# Supplementary material for: Cancer Stem Cells, not Bulk Tumor Cells, Determine Mechanisms of Resistance to SMO Inhibitors
Source: PubMed Central journal article supplement (PMC9853917; doi:10.1158/2767-9764.crc-22-0124), 2022-06-06
Supplement: NIHMS1809630-supplement-1.pdf [file NIHMS1809630-supplement-1.pdf]

| Supplementary Table 1: Characteristics of spontaneous Ptch;p53 MBs used in the study |                      |          |        |         |                     |                 |     |         |     |
|--------------------------------------------------------------------------------------|----------------------|----------|--------|---------|---------------------|-----------------|-----|---------|-----|
| subtype                                                                              | mice ID              | Ptch;p53 | gender | latency | # cells injected    | Tumor take rate |     | control | LDE |
| SI-CSC                                                                               | x16650               | het:hom  | M      | 60      | 2X10 <sup>6</sup>   | 18/20           | 90% | 6/6     | 5/5 |
| SI-CSC                                                                               | x17282               | het;hom  | M      | 50      | 3X10 <sup>6</sup>   | 18/20           | 90% | 6/6     | 6/6 |
| SD-CSC I                                                                             | x15924               | het:het  | F      | 145     | 3X10 <sup>6</sup>   | 5/10            | 50% | 4/4     | 1/1 |
| SD-CSC I                                                                             | F3572 (2' of x15924) | het;het  |        |         | 2X10 <sup>6</sup>   | 9/20            | 45% | 2/2     | 0/2 |
| SD-CSC I                                                                             | x15811               | het;wt   | M      | 181     | 3X10 <sup>6</sup>   | 5/10            | 50% | 2/4     | 0/1 |
| SD-CSC I                                                                             | F3590 (2' of x15811) | het;wt   |        |         | 2X10 <sup>6</sup>   | 7/20            | 35% | 1/2     | 0/3 |
| SD-CSC I                                                                             | x15762               | het;het  | F      | 218     | 3X10 <sup>6</sup>   | 6/10            | 60% | 3/3     | 0/3 |
| SD-CSC I                                                                             | x16660               | het;wt   | F      | 216     | 3.8X10 <sup>6</sup> | 14/16           | 88% | 4/4     | 4/4 |
| SD-CSC I                                                                             | x16598               | het;wt   | F      | 242     | 3.5X10 <sup>6</sup> | 11/16           | 69% | 3/3     | 3/3 |
| SD-CSC I                                                                             | x16934               | het;het  | F      | 193     | 2X10 <sup>6</sup>   | 12/20           | 60% | 1/1     | 3/3 |
| SD-CSC II                                                                            | F4479                | het;hom  | M      | 65      | 4X10 <sup>6</sup>   | 11/20           | 55% | 3/3     | 3/3 |
| SD-CSC II                                                                            | x16192               | het;het  | F      | 221     | 1X10 <sup>6</sup>   | 8/20            | 40% | 3/3     | 3/3 |

| Supplementary Table 2: Bisulfide sequencing sample information |                |            |           |           |
|----------------------------------------------------------------|----------------|------------|-----------|-----------|
| Sample ID                                                      | Source         | Tumor Type | Cell line | Treatment |
| LPMeseq1                                                       | 918 parental   | SD-CSC     | 918       | none      |
| LPMeseq2                                                       | 918 DMSO       | SD-CSC     | 918       | DMSO      |
| LPMeseq3                                                       | 918 LDEr       | SD-CSC     | 918       | LDE       |
| LPMeseq4                                                       | 2869 DMSO      | SD-CSC     | 2869      | DMSO      |
| LPMeseq5                                                       | 2869 LDEr      | SD-CSC     | 2869      | LDE       |
| LPMeseq6                                                       | 17282 parental | SI-CSC     | 17282     | none      |
| LPMeseq7                                                       | 17282 DMSO     | SI-CSC     | 17282     | DMSO      |
| LPMeseq8                                                       | 17282 LDEr     | SI-CSC     | 17282     | LDE       |
| LPMeseq9                                                       | 9410 DMSO      | SI-CSC     | 9410      | DMSO      |
| LPMeseq10                                                      | 9410 LDEr      | SI-CSC     | 9410      | LDE       |

# Supp Fig1

**A**

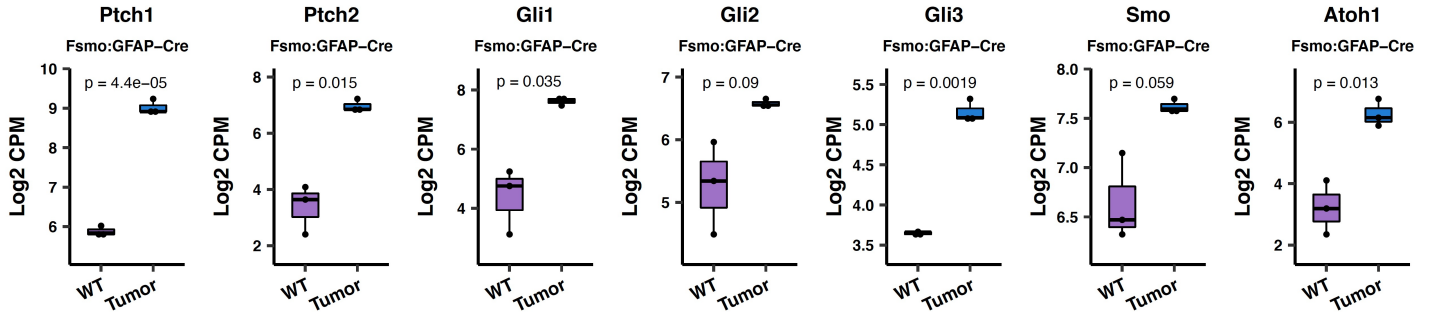

**B**

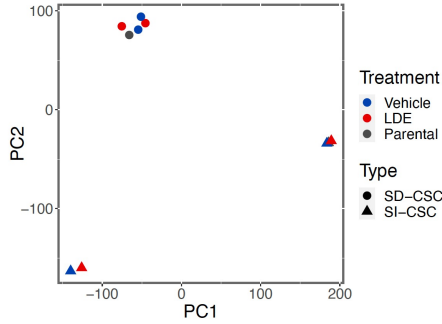

**C**

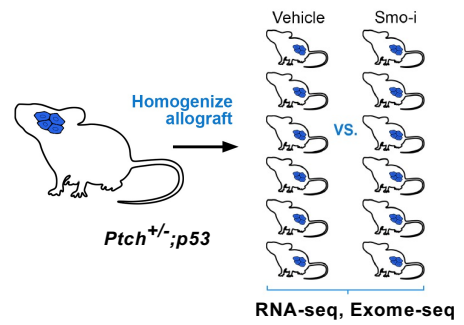

**D**

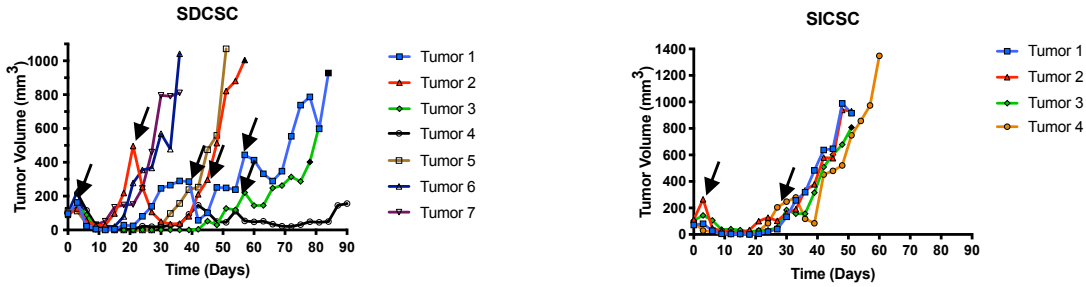

**E**

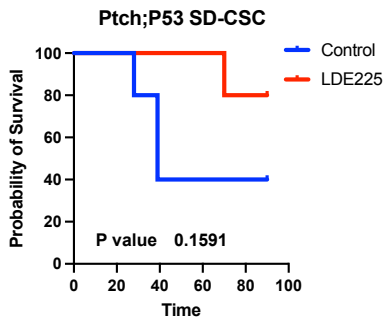

**F**

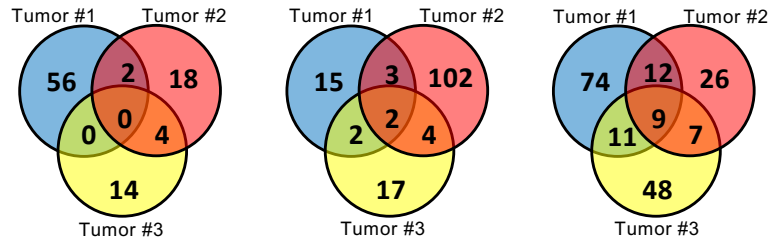

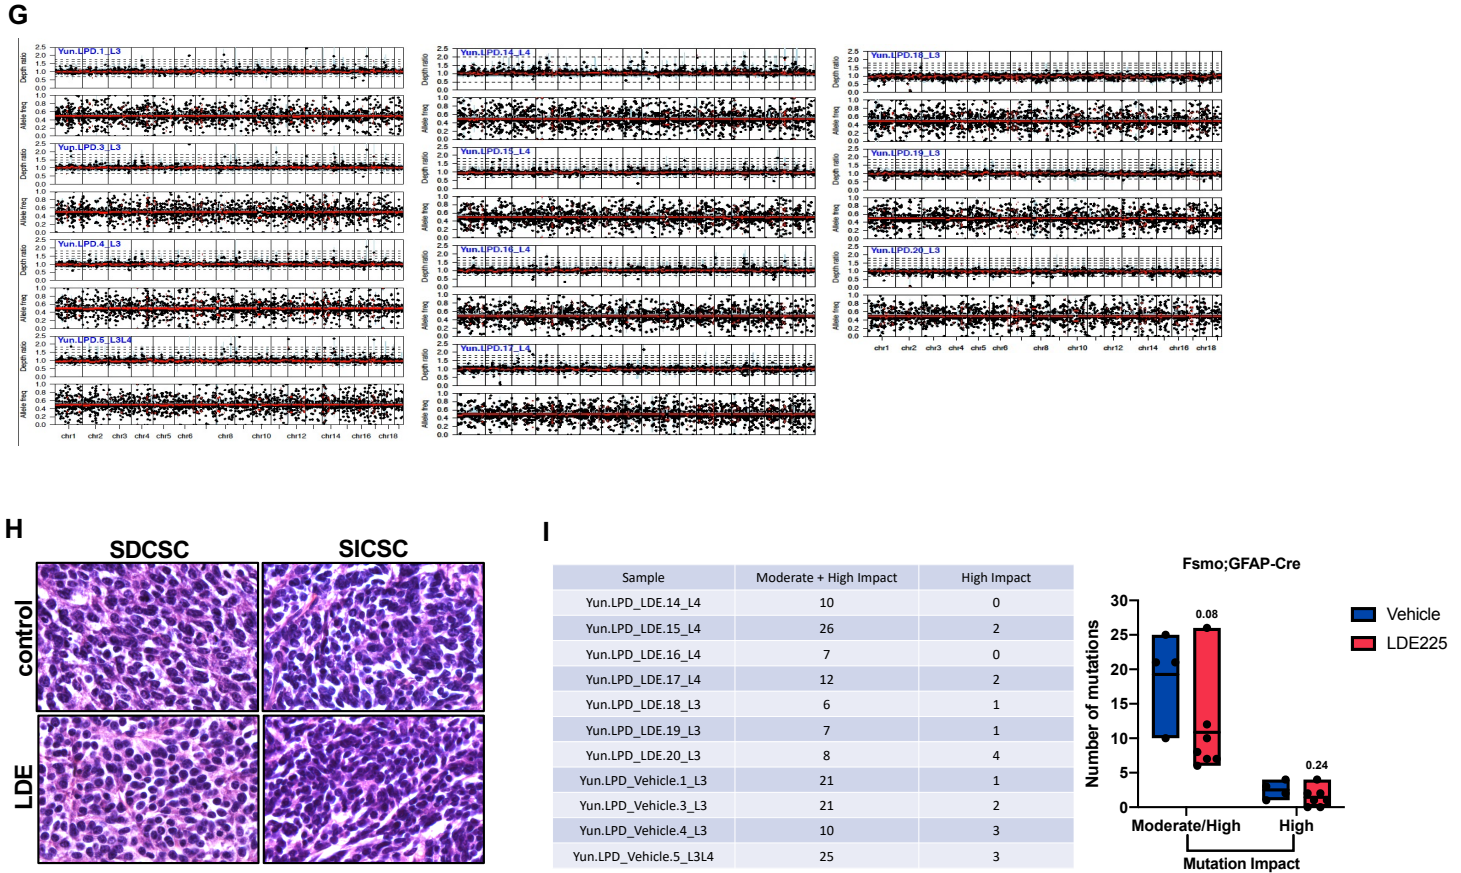

**Supplementary Figure 1. *FsmoM2;hGFAP-cre* and *Ptch;p53* SHH MB models treated with LDE225. A)** Elevated SHH signaling pathway genes in *FsmoM2;hGFAP-Cre* MB compared to wildtype cerebellum at p8. Box represents log<sub>2</sub>-scaled CPM range in RNA-seq data. Central line represents the mean. P-values were calculated using two-tailed Student's t-test. **B)** Whole-genome methylation profiles depict significant differences between SI-CSC and SD-CSCs. The dimensionality of methylation profiles of all the samples was reduced using Principal Component Analysis (PCA). A scatter plot on the two-dimensional plane using the first two principal components shows the significant differences between SD-CSCs and SI-CSCs. **C)** A schematic outlining experimental design: spontaneous *Ptch;p53* MBs tumor tissues were isolated, diced into small pieces, and admixed before injecting into a cohort of recipient mice that were randomly divided into two groups (vehicle vs. LDE225(SMOi) treatment). **D)** Representative growth profiles of SD-CSC and SI-CSC tumors treated with LDE225. **E)** Kaplan-Meier survival curve analysis showing survival difference between vehicle and LDE225 treated *Ptch;p53* SD-CSC tumors. **F)** Venn diagrams showing the number of treatment-induced SNPs in each subtype and their overlaps. Numbers indicate SNPs present in LDE-resistant tumors and absent in control-treated tumors from the matching parental tumor. See supplementary tables 3 and 4. **G)** A summary of identified mutations and copy number alterations in the SHH pathway genes in SMOi-resistant *Ptch;p53* SI-CSC and SD-CSC tumors. **H)** H&E staining of control and LDE225 treated tumors at harvest. N=3. **I)** Moderate and high impact mutations identified in vehicle and LDE225 treated *FsmoM2;hGFAP-Cre* MB MB, compared to normal tail DNA by whole exome sequencing analysis. Also see Supp Table 5.

A

Real Time-PCR analysis of acute treatment in vivo

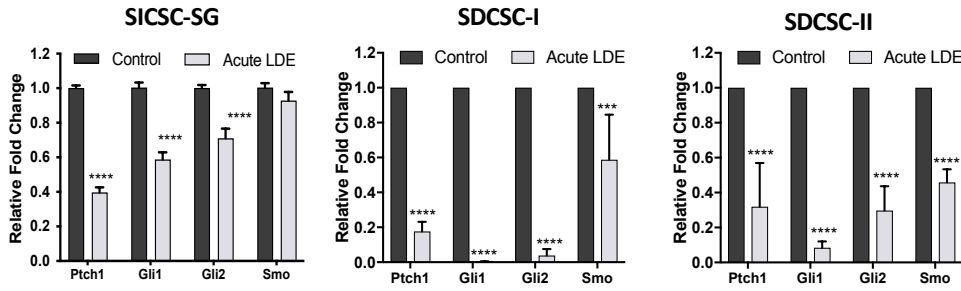

B

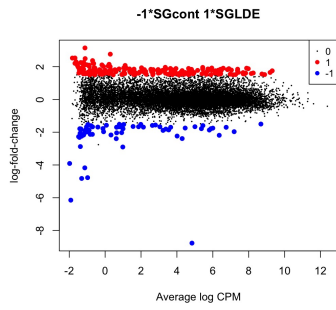

C

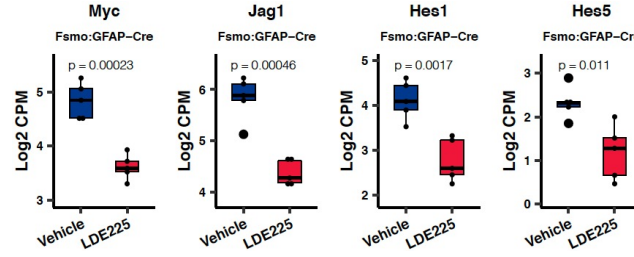

D

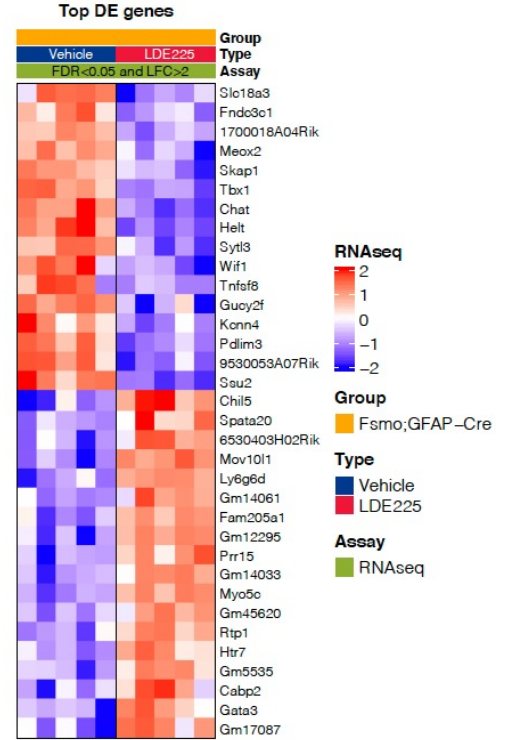

E

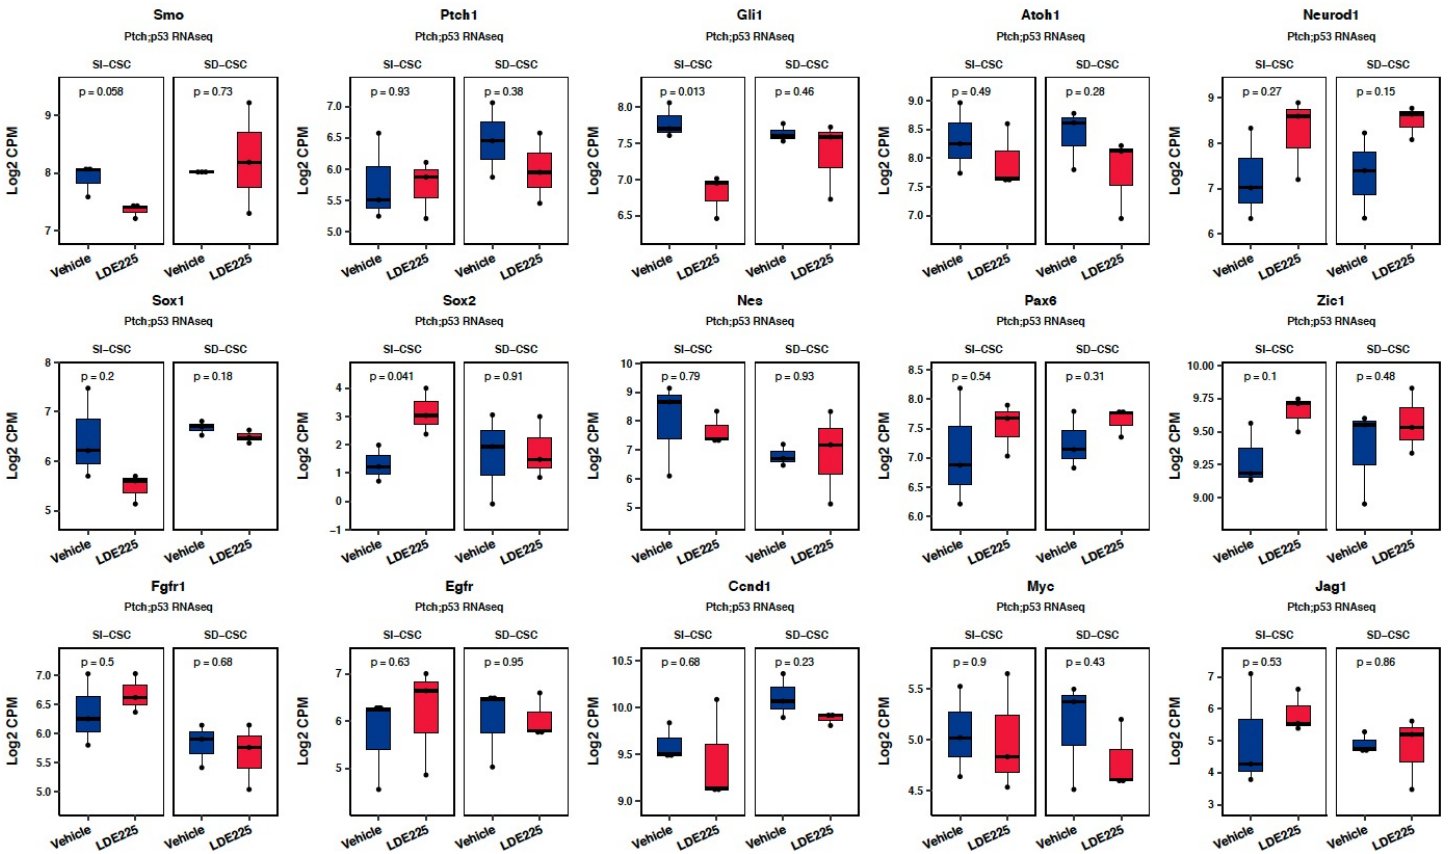

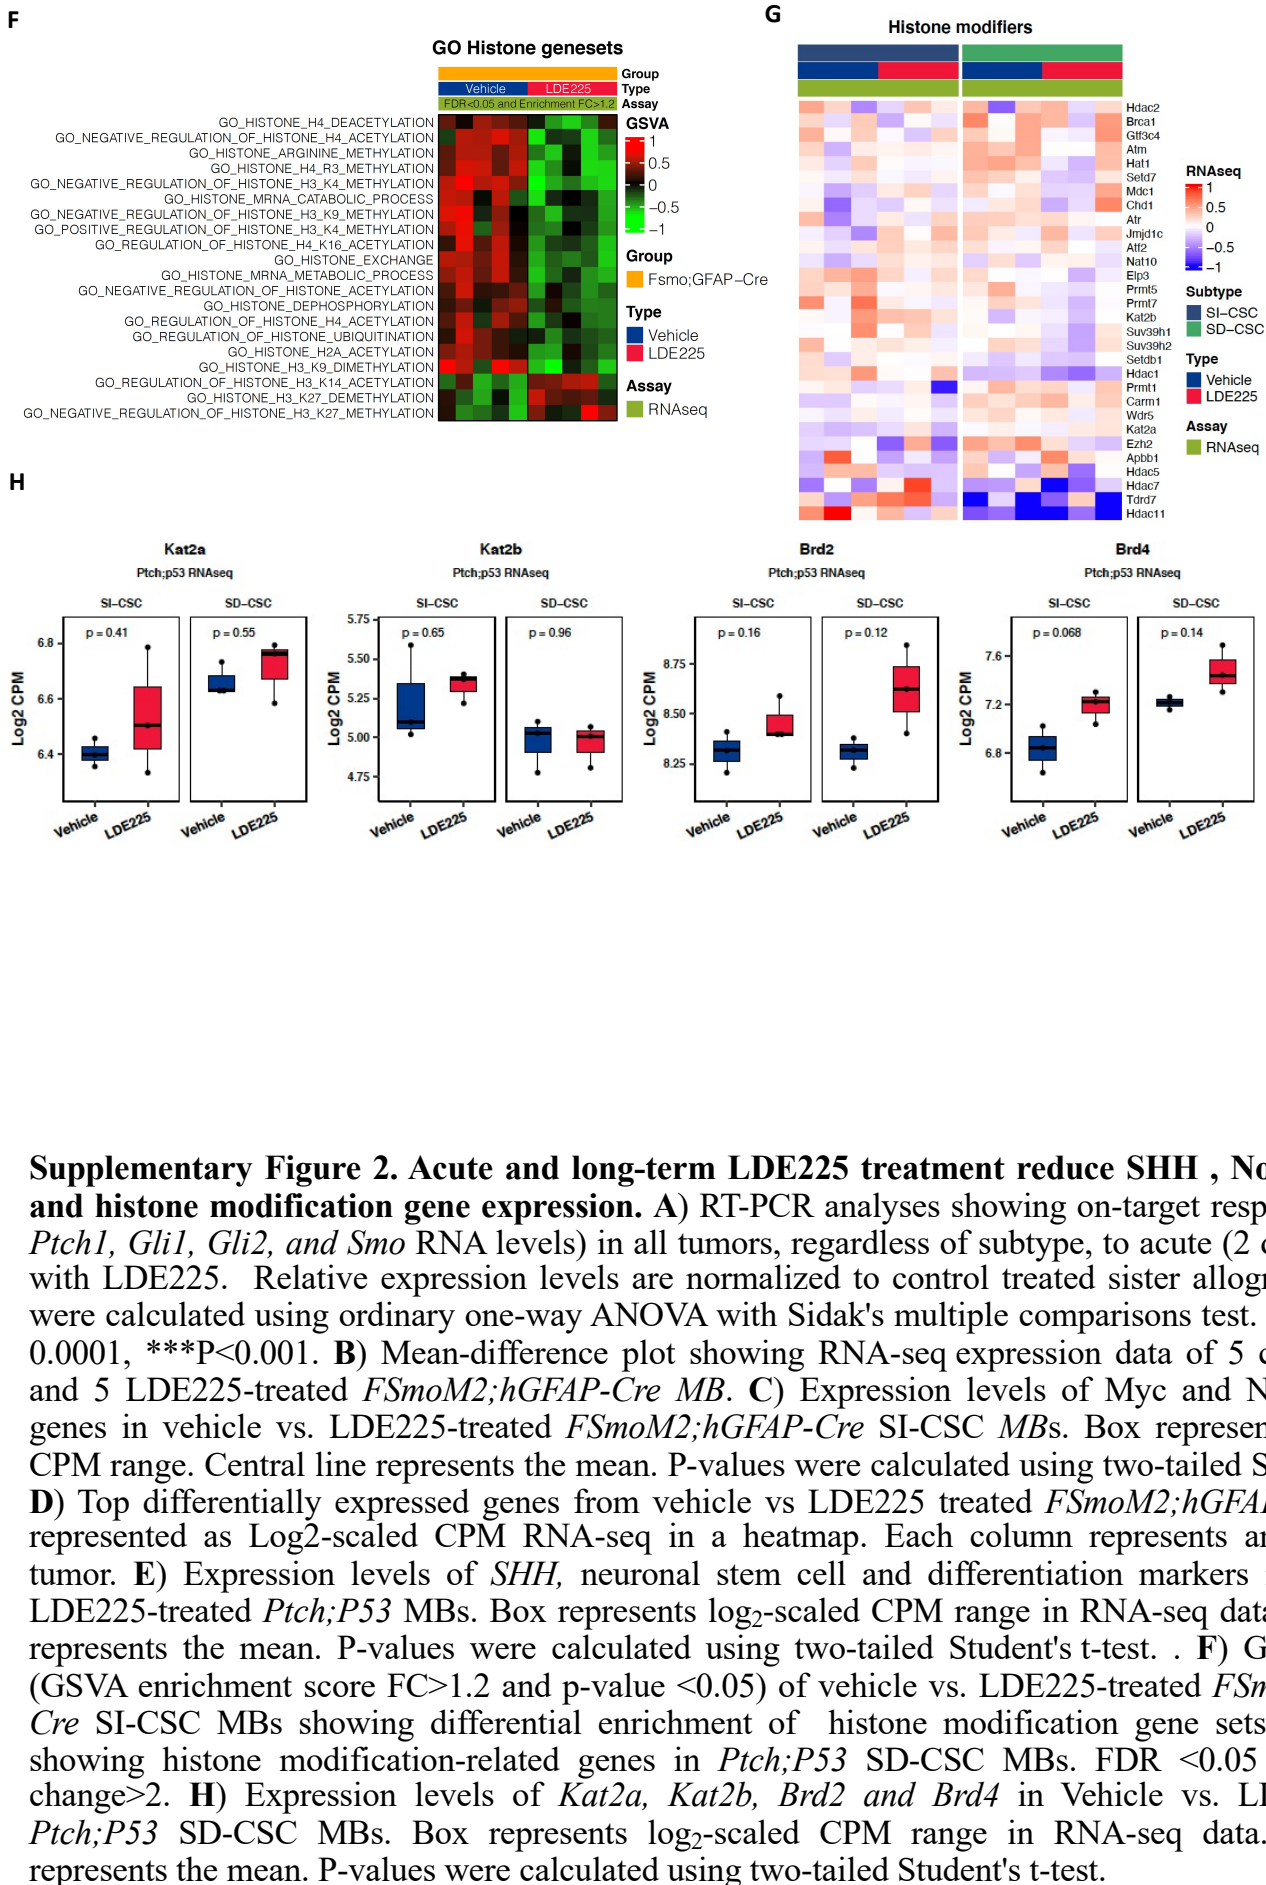

# SuppFig3

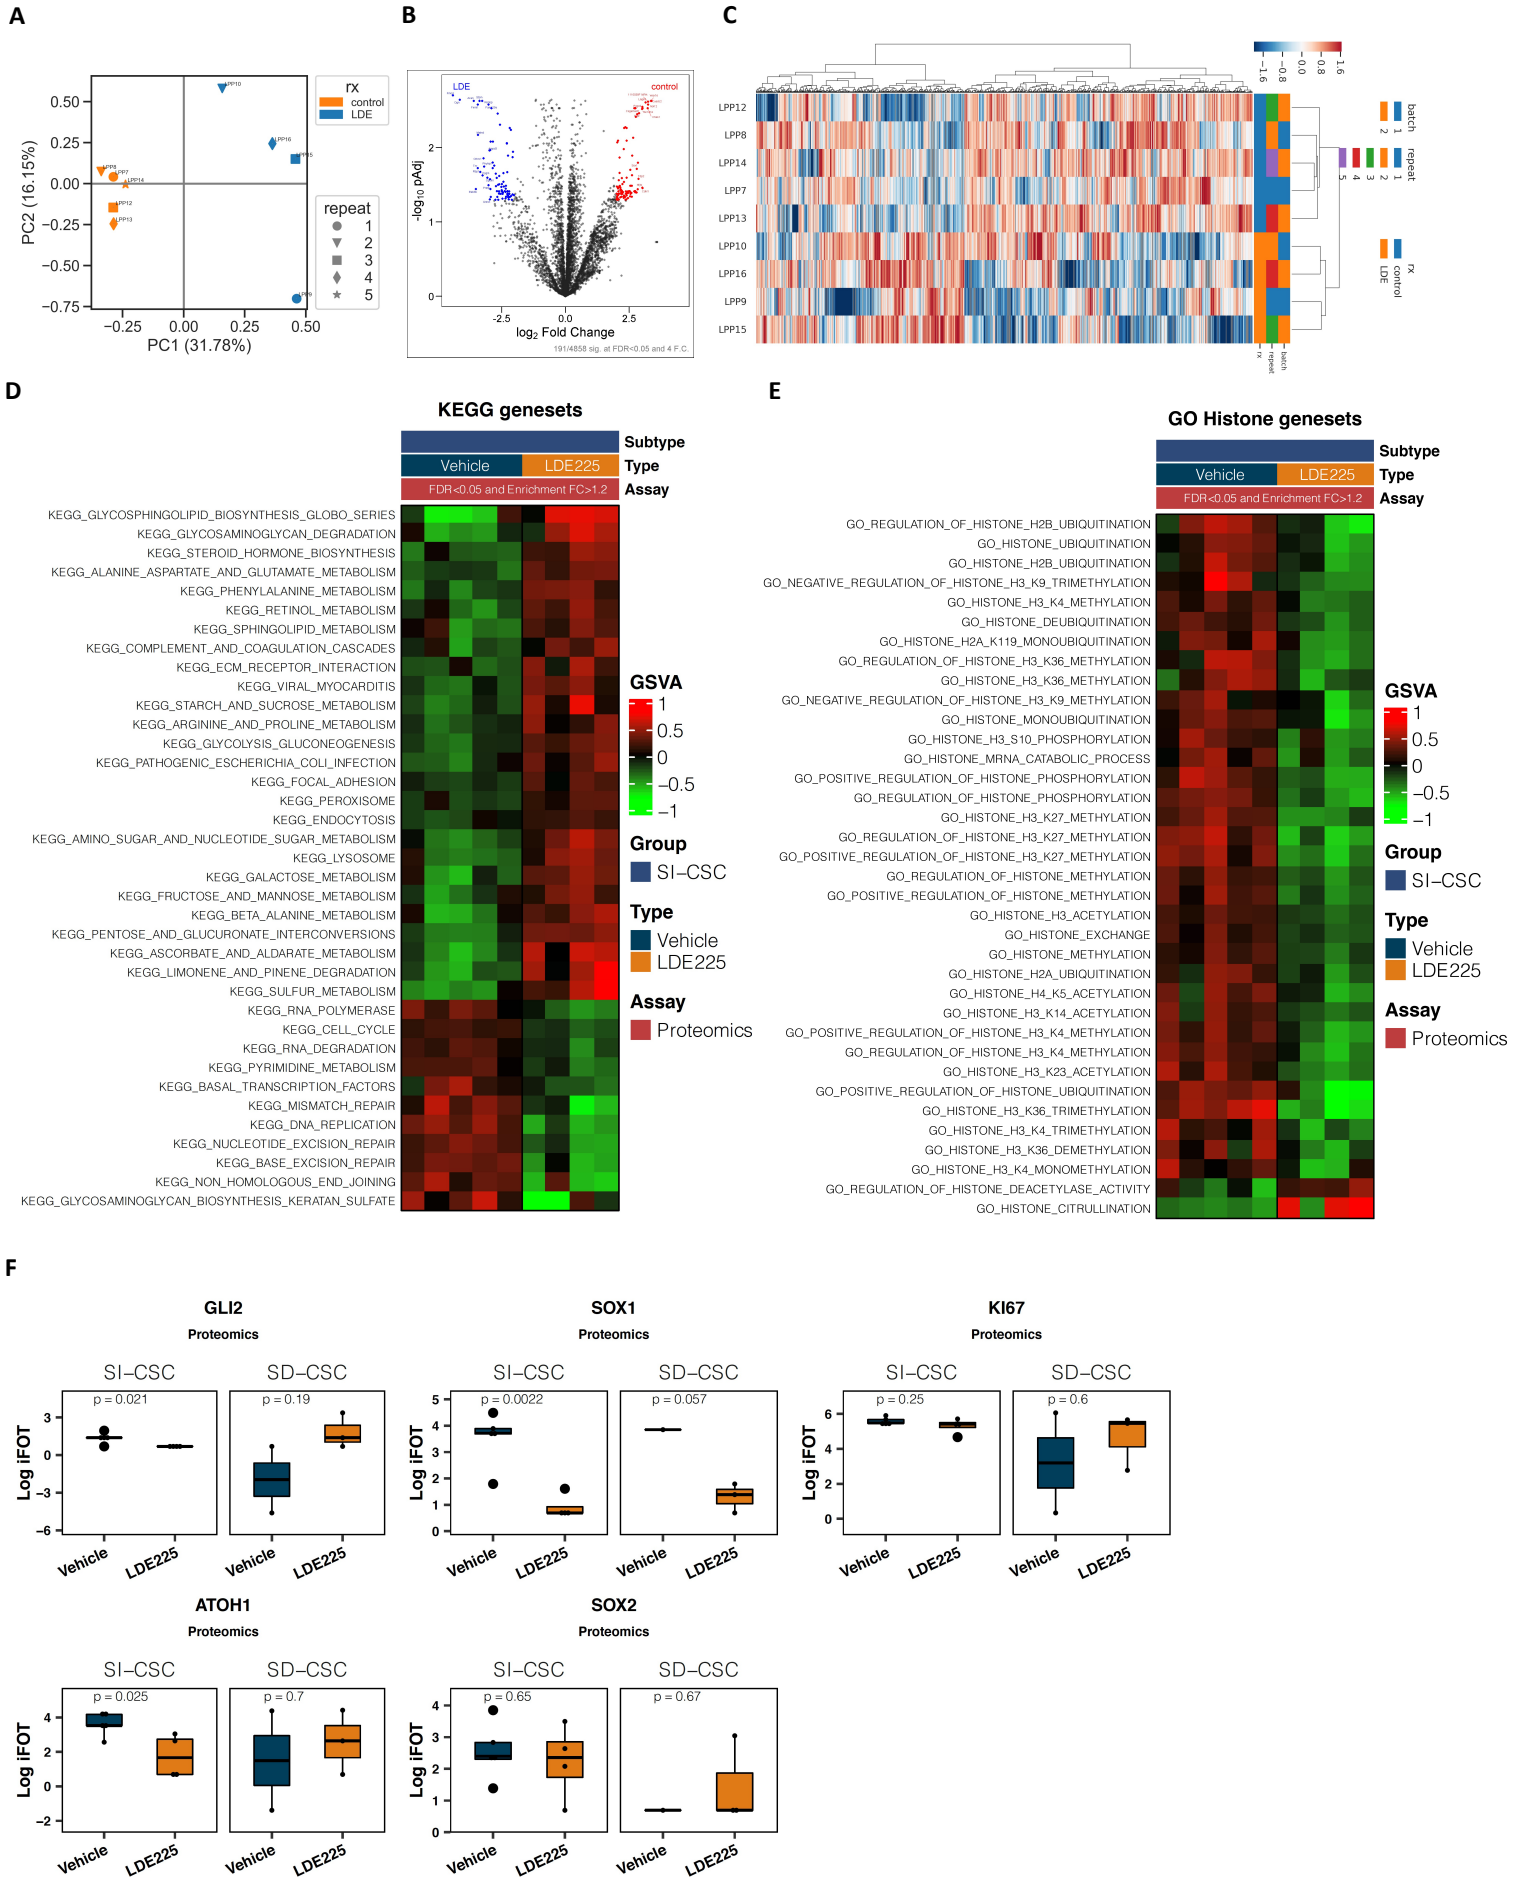

**Supplementary Figure 3. Proteomics analysis identifies differentially expressed proteins in LDE225 treated tumors.** **A)** Principal component analysis of the 5 vehicle and 4 LDE225-treated *Ptch;p53* SI-CSC MB samples analyzed by mass spectrometry. **B)** Volcano plots of protein expression changes between vehicle vs LDE225-treated *Ptch;p53* SI-CSC MBs. Blue dots represent the down-regulated proteins and red dots represent upregulated proteins. **C)** Heatmap showing differential expression of proteins in vehicle vs LDE225 treated *Ptch;p53* SI-CSC MBs. **D)** GSEA analyses (GSEA enrichment score  $FC > 1.2$  and  $FDR < 0.05$ ) of vehicle vs. LDE225-treated *Ptch;p53* SI-CSC MBs showing differential enrichment of KEGG gene sets. **E)** GSEA analyses (GSEA enrichment score  $FC > 1.2$  and  $FDR < 0.05$ ) of vehicle vs. LDE225-treated *Ptch;p53* SI-CSC MBs showing differential enrichment of GO Histone gene sets. **F)** Expression levels of GLI2, SOX1, SOX2, ATOH1 and KI67 proteins in vehicle vs. LDE225-treated *Ptch;p53* SI-CSC and SD-CSC MBs. Box represents  $\log_2$ -scaled iFOT range. Central line represents the mean. P-values were calculated using two-tailed Student's t-test.

SuppFig4

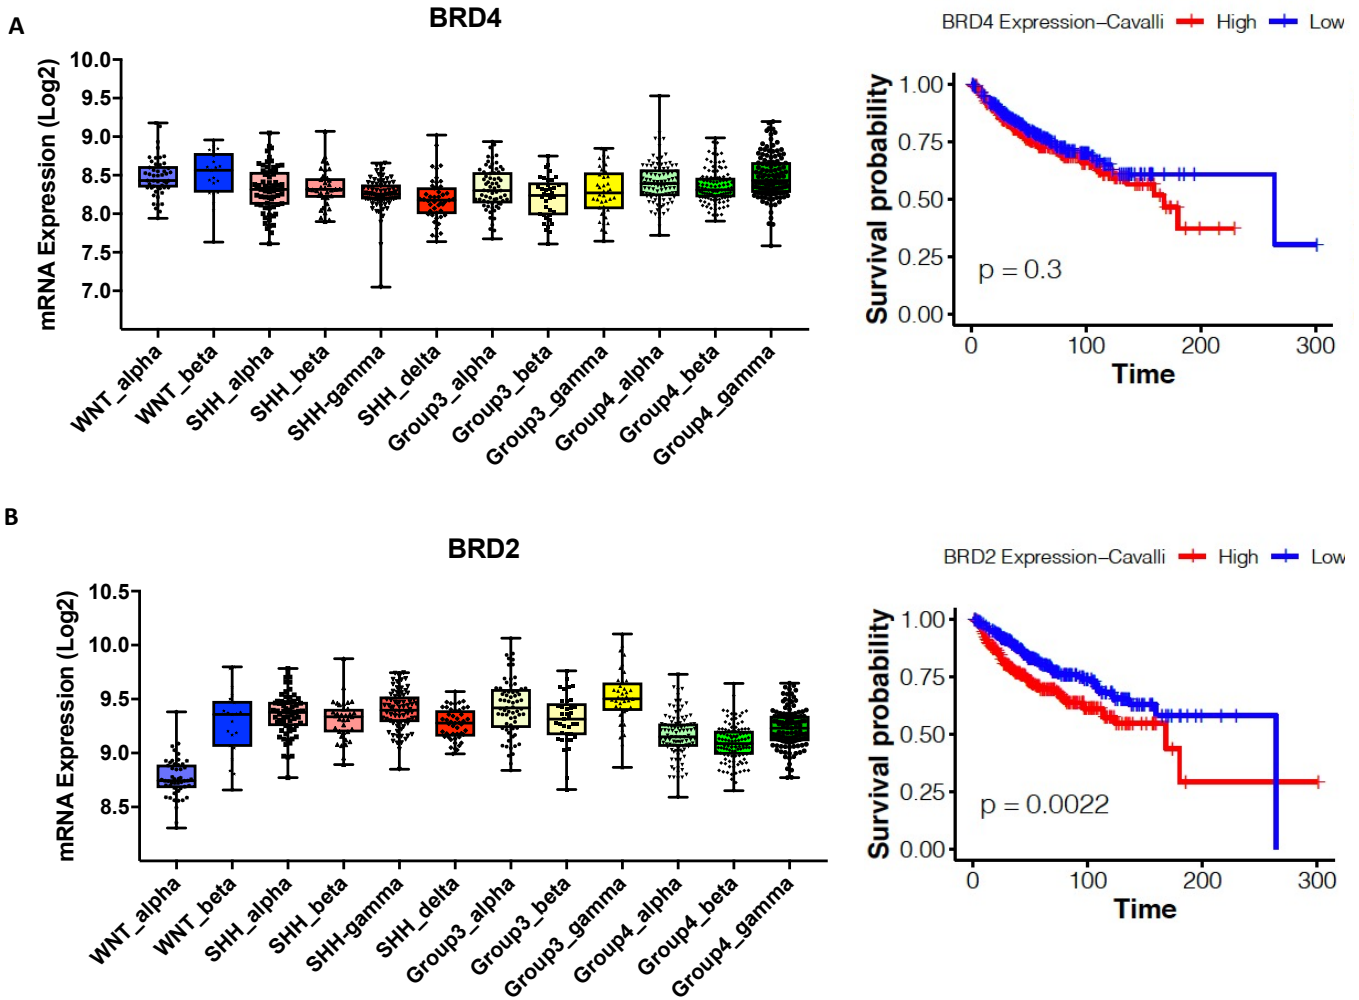

**Supplementary Figure 4. Meta-analysis of GSE85217 (Cavalli *et al*) data set using GlioVis. A, B) *BRD4* and *BRD2* mRNA expression levels in different human MB molecular subtypes (left), Kaplan-Meier survival curve analyses of human MB samples by subtypes (right). High and low expression cutoff was set at the median. P-values were calculated using ordinary one way ANOVA with Tukey's multiple comparisons test. (WNT: n = 70; SHH: n = 223; Gp3: n = 144; Gp4: n = 326).**



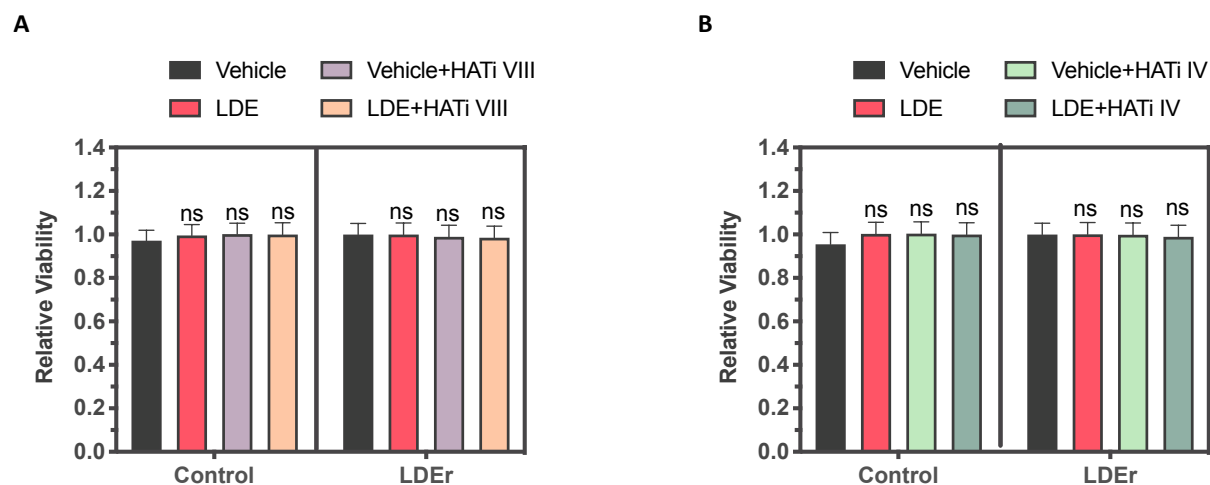

**Supplementary Figure 5. HAT inhibitors are ineffective in suppressing LDE-resistant SI-CSC tumorsphere growth in vitro. A, B) Vehicle and LDE-resistant *Ptch;p53* SI-CSC tumorspheres were treated with different HAT inhibitors *in vitro*. N=3.**

Supp Fig 6

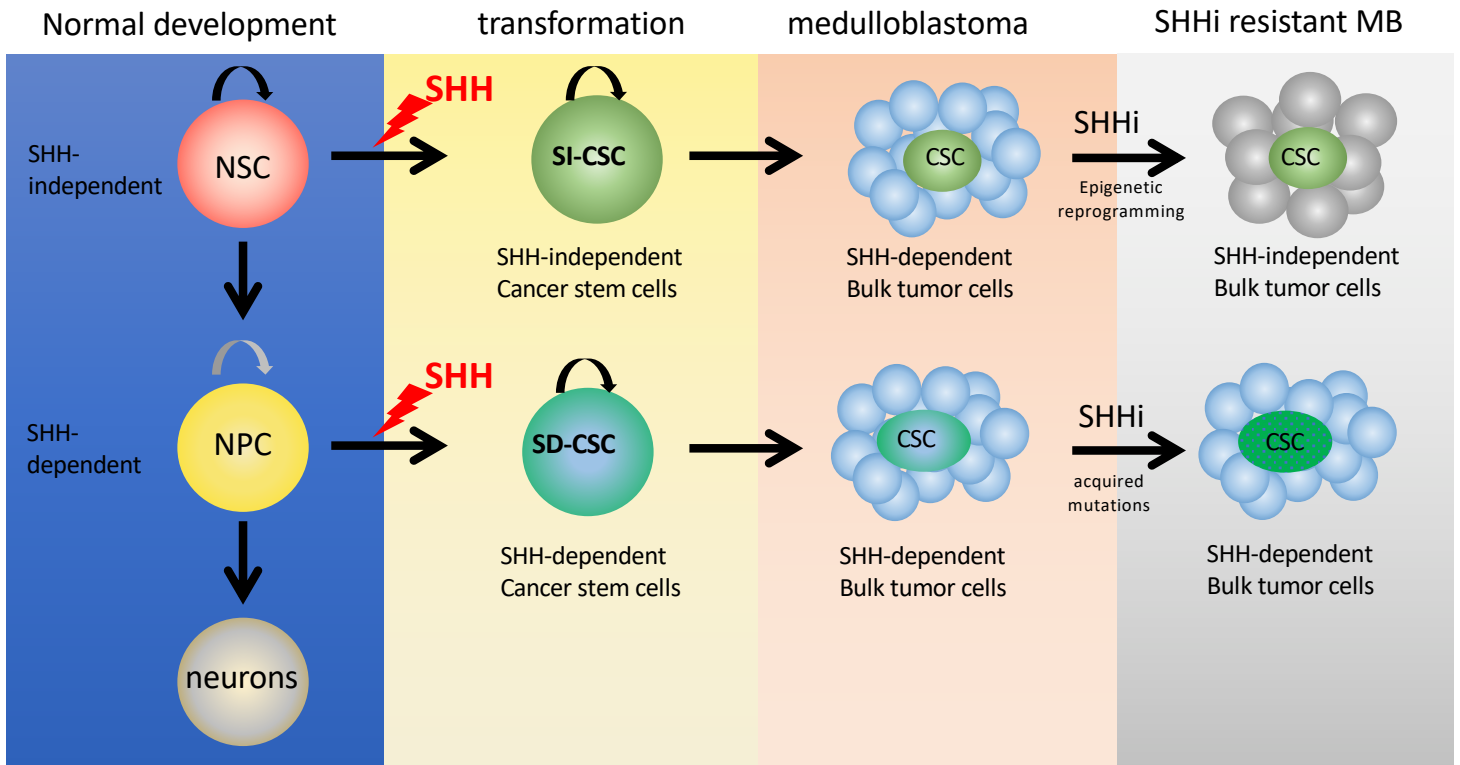

**Supplementary Figure 6. A schematic summary of our working model.** SHH MB can arise from transformation of either neural stem cells (NSCs, SHH-independent) or EGL neural progenitors (NPCs, SHH-dependent) in vivo. While bulk tumor cells in both tumor type depend on the SHH pathway, only the NPC-derived cancer stem cells (SD-CSC) depend on SHH signaling. SMOi treatment debulks both tumor types; however, acquired mutations within the SHH pathway occurs only in SD-CSC tumors. In SI-CSC subtype, CSCs are insensitive to SMOi and generate bulk tumor cells that deviates from normal NSC maturation through epigenetic reprogramming and generate SHH-independent progenitors/bulk tumor cells upon chronic SMOi exposure.
