# Supplementary material for: Cancer Stem Cells, not Bulk Tumor Cells, Determine Mechanisms of Resistance to SMO Inhibitors
Source: Cancer Res Commun. 2022 Jun 6;2(6):402–16. doi: 10.1158/2767-9764.CRC-22-0124 (PMC9853917; doi:10.1158/2767-9764.CRC-22-0124)
Supplement: Supplementary Table 3 — Mutational profiles for Ptch;p53 SD-CSC tumors [file crc-22-0124-s02.xlsx]

## Sheet: Sheet1
Supplementary Table 3 :Mutation profile of SDCSC tumors
SDCSC.1
_	CHROM	POS	ID	REF	ALT	C_QUAL	R1_QUAL	R2_QUAL	R3_QUAL	C_FILTER	R1_FILTER	R2_FILTER	R3_FILTER	C_MQ	R1_MQ	R2_MQ	R3_MQ	SNPEFF_EFFECT	SNPEFF_IMPACT	SNPEFF_FUNCTIONAL_CLASS	SNPEFF_CODON_CHANGE	SNPEFF_AMINO_ACID_CHANGE	SNPEFF_GENE_NAME	SNPEFF_GENE_BIOTYPE	SNPEFF_TRANSCRIPT_ID	SNPEFF_EXON_ID	SAMPLE_202325.GT	C_ALT_AF	R1_ALT_AF	R2_ALT_AF	R3_ALT_AF	C_ALT_AD	R1_ALT_AD	R2_ALT_AD	R3_ALT_AD	C_DP	R1_DP	R2_DP	R3_DP	SIM_DIFF	SOURCE	Mut_C_EF	Mut_R1_EF	Mut_R2_EF	Mut_R3_EF	Mut_C_E_DP	Mut_R1_E_DP	Mut_R2_E_DP	Mut_R3_E_DP
chr1_111859994_G_C	chr1	111859994	rs31396361	G	C	162.77	1152.77	2384.77	N/A	PASS	PASS	PASS	N/A	60	60	60	N/A	NON_SYNONYMOUS_CODING	MODERATE	MISSENSE	aCc/aGc	T937S	Dsel	protein_coding	ENSMUST00000035462	exon_1_111858702_111863640	G/C	0.186047	0.553846	0.634615	N/A	8	36	66	N/A	43	65	104	103	sim	F4390 F4393	0.642857	0.571429	0.4	0.722222	14	7	10	18
chr13_62518599_A_G	chr13	62518599	.	A	G	N/A	N/A	65.77	N/A	N/A	N/A	PASS	N/A	N/A	N/A	48.13	N/A	NON_SYNONYMOUS_CODING	MODERATE	MISSENSE	aTt/aCt	I107T	Zfp934	protein_coding	ENSMUST00000101547	exon_13_62517500_62518730	A/G	0	N/A	0.2	N/A	0	N/A	4	N/A	41	93	20	68	diff	F4393	0	0	0	0.75	54	45	18	4
chr6_34387803_G_T	chr6	34387803	rs13464107	G	T	521.77	9343.77	N/A	N/A	PASS	PASS	N/A	N/A	60	59.99	N/A	N/A	NON_SYNONYMOUS_CODING	MODERATE	MISSENSE	aaG/aaT	K38N	Akr1b10	protein_coding	ENSMUST00000115051	exon_6_34387756_34387839	G/T	0.256757	0.784615	N/A	N/A	19	255	N/A	N/A	74	325	73	114	diff	F4390	0.25	0.736842	0.272727	0.3	32	95	22	10
chr5_134624446_T_C	chr5	134624446	rs13496900	T	C	196.77	N/A	N/A	1180.77	PASS	N/A	N/A	PASS	60	N/A	N/A	60	NON_SYNONYMOUS_CODING	MODERATE	MISSENSE	aAc/aGc	N155S	Eif4h	protein_coding	ENSMUST00000036125	exon_5_134624441_134624500	T/C	0.241379	N/A	N/A	0.636364	7	N/A	N/A	28	29	49	35	44	diff	F4402	0.894737	0	0.938462	0.779412	57	182	65	68
chr6_34364301_G_A	chr6	34364301	rs225357632	G	A	522.77	5297.77	N/A	N/A	PASS	PASS	N/A	N/A	60	60	N/A	N/A	NON_SYNONYMOUS_CODING	MODERATE	MISSENSE	Gag/Aag	E242K	Akr1b8	protein_coding	ENSMUST00000038406	exon_6_34364237_34364318	G/A	0.293103	0.77551	N/A	N/A	17	152	N/A	N/A	58	196	53	100	diff	F4390	0	0	0.222222	0	3	3	9	5
chr6_29755576_C_T	chr6	29755576	.	C	T	N/A	1246.77	N/A	N/A	N/A	PASS	N/A	N/A	N/A	60	N/A	N/A	NON_SYNONYMOUS_CODING	MODERATE	MISSENSE	Ctt/Ttt	L416F	Smo	protein_coding	ENSMUST00000001812	exon_6_29755483_29755606	C/T	0	0.384615	N/A	N/A	0	40	N/A	N/A	66	104	51	90	diff	F4390	0	0.48248	0	0	188	371	183	88
chr6_34392983_G_A	chr6	34392983	rs37670452	G	A	413.77	5362.77	N/A	N/A	PASS	PASS	N/A	N/A	60	60	N/A	N/A	NON_SYNONYMOUS_CODING	MODERATE	MISSENSE	aGg/aAg	R215K	Akr1b10	protein_coding	ENSMUST00000115051	exon_6_34392915_34392996	G/A	0.302326	0.826816	N/A	N/A	13	148	N/A	N/A	43	179	32	58	diff	F4390	0.382353	0.78	0.416667	0.47619	34	100	24	21
chr7_67736816_G_A	chr7	67736816	rs36591435	G	A	135.77	604.77	N/A	N/A	PASS	PASS	N/A	N/A	60	60	N/A	N/A	NON_SYNONYMOUS_CODING	MODERATE	MISSENSE	gCa/gTa	A366V	Synm	protein_coding	ENSMUST00000051389	exon_7_67734460_67736906	G/A	0.3	0.791667	N/A	N/A	6	19	N/A	N/A	20	24	30	41	diff	F4390	0	0	0.666667	0	0	0	3	0
chr19_5647130_A_G	chr19	5647130	.	A	G	N/A	191.77	N/A	N/A	N/A	PASS	N/A	N/A	N/A	60	N/A	N/A	NON_SYNONYMOUS_CODING	MODERATE	MISSENSE	aAc/aGc	N455S	Rela	protein_coding	ENSMUST00000025867	exon_19_5646800_5648130	A/G	0	0.666667	N/A	N/A	0	6	N/A	N/A	9	9	10	18	diff	F4390	0	0.611111	0	0	38	54	46	30
chr6_34874508_C_A	chr6	34874508	rs238415835	C	A	283.77	1780.77	N/A	N/A	PASS	PASS	N/A	N/A	60	60	N/A	N/A	NON_SYNONYMOUS_CODING	MODERATE	MISSENSE	aGc/aTc	S137I	3110062M04Rik	protein_coding	ENSMUST00000055097	exon_6_34871771_34874695	C/A	0.23913	0.868852	N/A	N/A	11	53	N/A	N/A	46	61	28	36	diff	F4390	0	0.4	0	0	8	10	8	2
chr6_15770274_C_T	chr6	15770274	rs232168810	C	T	916.77	3925.77	N/A	N/A	PASS	PASS	N/A	N/A	60	60	N/A	N/A	NON_SYNONYMOUS_CODING	MODERATE	MISSENSE	aCa/aTa	T93I	Mdfic	protein_coding	ENSMUST00000101663	exon_6_15770214_15770492	C/T	0.341176	0.689441	N/A	N/A	29	111	N/A	N/A	85	161	75	100	diff	F4390	0.421053	0.730769	0.25	0	19	26	20	15
chr5_146955515_G_A	chr5	146955515	rs244918678	G	A	N/A	N/A	570.77	N/A	N/A	N/A	PASS	N/A	N/A	N/A	60	N/A	NON_SYNONYMOUS_CODING	MODERATE	MISSENSE	Gcc/Acc	A359T	Gtf3a	protein_coding	ENSMUST00000146511	exon_5_146955368_146955614	G/A	0	N/A	1	N/A	0	N/A	16	N/A	3	3	16	20	diff	F4393	0.982456	0.977273	0.94	0.984375	57	44	50	64
chr6_35190061_C_A	chr6	35190061	rs37147506	C	A	567.77	5766.77	N/A	N/A	PASS	PASS	N/A	N/A	60	60	N/A	N/A	NON_SYNONYMOUS_CODING	MODERATE	MISSENSE	gaC/gaA	D285E	Nup205	protein_coding	ENSMUST00000043815	exon_6_35189855_35190083	C/A	0.307692	0.829016	N/A	N/A	20	160	N/A	N/A	65	193	65	94	diff	F4390	0.375	0.753521	0.34	0.36	96	284	50	50
chr1_111859457_T_C	chr1	111859457	rs33265251	T	C	351.77	N/A	1697.77	N/A	PASS	N/A	PASS	N/A	60	N/A	60	N/A	NON_SYNONYMOUS_CODING	MODERATE	MISSENSE	aAt/aGt	N1116S	Dsel	protein_coding	ENSMUST00000035462	exon_1_111858702_111863640	T/C	0.37931	N/A	0.686567	N/A	11	N/A	46	N/A	29	47	67	73	diff	F4393	0.666667	0.625	0.4	0	6	8	5	11
chr7_67559948_G_A	chr7	67559948	rs37790502	G	A	509.77	N/A	913.77	N/A	PASS	N/A	PASS	N/A	60	N/A	60	N/A	NON_SYNONYMOUS_CODING	MODERATE	MISSENSE	Cgg/Tgg	R168W	Lrrc28	protein_coding	ENSMUST00000053950	exon_7_67559858_67560064	G/A	0.354167	N/A	0.717949	N/A	17	N/A	28	N/A	48	40	39	43	diff	F4393	0.666667	0.5	0.666667	0.4	12	4	6	5
chr3_15548731_T_C	chr3	15548731	.	T	C	N/A	307.77	N/A	N/A	N/A	PASS	N/A	N/A	N/A	55.97	N/A	N/A	NON_SYNONYMOUS_CODING	MODERATE	MISSENSE	aAc/aGc	N97S	Sirpb1b	protein_coding	ENSMUST00000091319	exon_3_15548591_15548947	T/C	0	0.228571	N/A	N/A	0	8	N/A	N/A	46	35	39	85	diff	F4390	0	0	0.5	0	0	2	4	4
chr12_111809776_T_G	chr12	111809776	rs29136105	T	G	N/A	N/A	120.77	251.77	N/A	N/A	PASS	PASS	N/A	N/A	60	60	SYNONYMOUS_CODING	LOW	SILENT	Aga/Cga	R128	Xrcc3	nonsense_mediated_decay	ENSMUST00000021715	exon_12_111809752_111809964	T/G	0	N/A	0.666667	0.5	0	N/A	4	8	12	3	6	16	sim	F4393 F4402	0.875	0.571429	0	0.9	8	7	5	10
chr16_91931526_A_G	chr16	91931526	rs264658642	A	G	N/A	N/A	515.77	1174.77	N/A	N/A	PASS	PASS	N/A	N/A	60	60	SYNONYMOUS_CODING	LOW	SILENT	tcT/tcC	S10	Atp5o	protein_coding	ENSMUST00000023677	exon_16_91931520_91931687	A/G	0	N/A	0.517241	0.47619	0	N/A	15	40	19	32	29	84	sim	F4393 F4402	1	1	0.994286	1	251	206	175	209
chr9_90226114_G_T	chr9	90226114	rs50706486	G	T	N/A	N/A	581.77	N/A	N/A	N/A	PASS	N/A	N/A	N/A	60	N/A	SYNONYMOUS_CODING	LOW	SILENT	gcC/gcA	A461	Tbc1d2b	protein_coding	ENSMUST00000041767	exon_9_90226021_90226404	G/T	0	N/A	0.73913	N/A	0	N/A	17	N/A	7	2	23	19	diff	F4393	0.35	0.333333	0.266667	0.6	20	18	15	25
chr12_35526790_G_A	chr12	35526790	rs3021561	G	A	726.77	N/A	1212.77	N/A	PASS	N/A	PASS	N/A	60	N/A	60	N/A	SYNONYMOUS_CODING	LOW	SILENT	gaC/gaT	D47	Ahr	protein_coding	ENSMUST00000116436	exon_12_35526681_35526868	G/A	0.352941	N/A	0.633333	N/A	24	N/A	38	N/A	68	63	60	95	diff	F4393	0	0	1	0	0	0	2	2
chr6_17553288_C_T	chr6	17553288	rs33565079	C	T	526.77	3759.77	N/A	N/A	PASS	PASS	N/A	N/A	60	60	N/A	N/A	SYNONYMOUS_CODING	LOW	SILENT	taC/taT	Y1024	Met	protein_coding	ENSMUST00000080469	exon_6_17553239_17553469	C/T	0.287879	0.63253	N/A	N/A	19	105	N/A	N/A	66	166	58	78	diff	F4390	0	0	0	0.5	2	1	2	4
chr6_17654125_C_T	chr6	17654125	rs47126577	C	T	251.77	2398.77	N/A	N/A	PASS	PASS	N/A	N/A	60	60	N/A	N/A	SYNONYMOUS_CODING	LOW	SILENT	Ctg/Ttg	L59	Capza2	processed_transcript	ENSMUST00000015877	exon_6_17654106_17654169	C/T	0.272727	0.702128	N/A	N/A	9	66	N/A	N/A	33	94	54	75	diff	F4390	0.772455	0.912935	0.701923	0.752381	167	402	104	105
chr9_90226096_T_C	chr9	90226096	rs224174565	T	C	N/A	N/A	637.77	N/A	N/A	N/A	PASS	N/A	N/A	N/A	60	N/A	SYNONYMOUS_CODING	LOW	SILENT	tcA/tcG	S467	Tbc1d2b	protein_coding	ENSMUST00000041767	exon_9_90226021_90226404	T/C	0	N/A	0.678571	N/A	0	N/A	19	N/A	7	3	28	26	diff	F4393	0.428571	0.45	0.363636	0.631579	21	20	11	19
chr6_35196547_C_A	chr6	35196547	rs37665474	C	A	861.77	9969.77	N/A	N/A	PASS	PASS	N/A	N/A	60	60	N/A	N/A	SYNONYMOUS_CODING	LOW	SILENT	ctC/ctA	L444	Nup205	protein_coding	ENSMUST00000043815	exon_6_35196434_35196550	C/A	0.302083	0.817109	N/A	N/A	29	277	N/A	N/A	96	339	94	155	diff	F4390	0.388889	0.792453	0.360656	0.384615	72	212	61	52
chr1_131672246_C_T	chr1	131672246	rs36687320	C	T	1167.77	N/A	2205.77	N/A	PASS	N/A	PASS	N/A	60	N/A	60	N/A	SYNONYMOUS_CODING	LOW	SILENT	tgC/tgT	C277	Ctse	protein_coding	ENSMUST00000073350	exon_1_131672204_131672345	C/T	0.507246	N/A	0.7625	N/A	35	N/A	61	N/A	69	42	80	52	diff	F4393	0	0	1	0	0	0	2	0
chr6_34387827_C_T	chr6	34387827	rs39339386	C	T	489.77	8352.77	N/A	N/A	PASS	PASS	N/A	N/A	60	59.98	N/A	N/A	SYNONYMOUS_CODING	LOW	SILENT	ttC/ttT	F46	Akr1b10	protein_coding	ENSMUST00000115051	exon_6_34387756_34387839	C/T	0.257576	0.799308	N/A	N/A	17	231	N/A	N/A	66	289	72	112	diff	F4390	0	0.709677	0.217391	0	40	93	23	14
chr1_111859603_A_G	chr1	111859603	rs33265249	A	G	367.77	N/A	1914.77	N/A	PASS	N/A	PASS	N/A	60	N/A	60	N/A	SYNONYMOUS_CODING	LOW	SILENT	aaT/aaC	N1067	Dsel	protein_coding	ENSMUST00000035462	exon_1_111858702_111863640	A/G	0.461538	N/A	0.776119	N/A	12	N/A	52	N/A	26	39	67	64	diff	F4393	0.428571	0.8	0	0.6	7	5	4	10
chr1_38813412_A_G	chr1	38813412	rs33058947	A	G	379.77	N/A	N/A	762.77	PASS	N/A	N/A	PASS	60	N/A	N/A	60	SYNONYMOUS_CODING	LOW	SILENT	tcT/tcC	S119	Lonrf2	protein_coding	ENSMUST00000039612	exon_1_38813213_38813420	A/G	0.333333	N/A	N/A	0.685714	13	N/A	N/A	24	39	32	31	35	diff	F4402	0.4375	0.6	0	0.625	32	5	5	16
chr6_35079961_T_C	chr6	35079961	rs37430528	T	C	510.77	5896.77	N/A	N/A	PASS	PASS	N/A	N/A	60	60	N/A	N/A	SYNONYMOUS_CODING	LOW	SILENT	aaA/aaG	K58	Cnot4	protein_coding	ENSMUST00000044163	exon_6_35079961_35080226	T/C	0.264706	0.822335	N/A	N/A	18	162	N/A	N/A	68	197	71	114	diff	F4390	0.941176	1	1	1	17	67	6	3
chr9_109105957_T_C	chr9	109105957	rs250190539	T	C	N/A	N/A	N/A	391.77	N/A	N/A	N/A	PASS	N/A	N/A	N/A	60	SYNONYMOUS_CODING	LOW	SILENT	agT/agC	S956	Plxnb1	protein_coding	ENSMUST00000072093	exon_9_109105916_109106038	T/C	0	N/A	N/A	0.483871	0	N/A	N/A	15	10	4	16	31	diff	F4402	0.769231	0.818182	0.666667	0.833333	13	11	18	18
chr6_13836799_A_C	chr6	13836799	rs241670682	A	C	1001.77	6349.77	N/A	N/A	PASS	PASS	N/A	N/A	60	60	N/A	N/A	SYNONYMOUS_CODING	LOW	SILENT	gtT/gtG	V35	Gpr85	protein_coding	ENSMUST00000060442	exon_6_13834458_13837073	A/C	0.394737	0.759657	N/A	N/A	30	177	N/A	N/A	76	233	87	152	diff	F4390	0.296053	0.633663	0.325301	0.25641	152	202	83	78
chr6_15378004_A_G	chr6	15378004	.	A	G	70.77	801.77	N/A	N/A	PASS	PASS	N/A	N/A	60	60	N/A	N/A	SYNONYMOUS_CODING	LOW	SILENT	caA/caG	Q150	Foxp2	protein_coding	ENSMUST00000115472	exon_6_15377951_15378088	A/G	0.166667	0.666667	N/A	N/A	4	24	N/A	N/A	24	36	14	31	diff	F4390	0.5	0	0	0	4	10	4	9
chr6_34392412_C_T	chr6	34392412	rs216093598	C	T	1244.77	12922.8	N/A	N/A	PASS	PASS	N/A	N/A	60	60	N/A	N/A	SYNONYMOUS_CODING	LOW	SILENT	acC/acT	T164	Akr1b10	protein_coding	ENSMUST00000115051	exon_6_34392389_34392495	C/T	0.251256	0.737945	N/A	N/A	50	352	N/A	N/A	199	477	153	280	diff	F4390	0.578947	0.930233	0.777778	0.4	19	86	9	5
chr6_34388847_T_G	chr6	34388847	rs13464106	T	G	501.77	4318.77	N/A	N/A	PASS	PASS	N/A	N/A	59.92	59.87	N/A	N/A	SYNONYMOUS_CODING	LOW	SILENT	ctT/ctG	L102	Akr1b10	protein_coding	ENSMUST00000038383	exon_6_34388776_34388892	T/G	0.457143	0.779221	N/A	N/A	16	120	N/A	N/A	35	154	37	56	diff	F4390	0.259259	0.741379	0	0.428571	27	116	28	14
chr1_111860215_G_A	chr1	111860215	rs31932688	G	A	764.77	N/A	3520.77	N/A	PASS	N/A	PASS	N/A	60	N/A	60	N/A	SYNONYMOUS_CODING	LOW	SILENT	ctC/ctT	L863	Dsel	protein_coding	ENSMUST00000035462	exon_1_111858702_111863640	G/A	0.387097	N/A	0.738095	N/A	24	N/A	93	N/A	62	67	126	124	diff	F4393	1	0	0	0	5	5	4	2
chr6_17934255_A_G	chr6	17934255	rs33590830	A	G	426.77	2794.77	N/A	N/A	PASS	PASS	N/A	N/A	60	60	N/A	N/A	SYNONYMOUS_CODING	LOW	SILENT	aaA/aaG	K476	St7	retained_intron	ENSMUST00000000674	exon_6_17934119_17934258	A/G	0.277778	0.623077	N/A	N/A	15	81	N/A	N/A	54	130	44	82	diff	F4390	0.233333	0.75	0.377358	0.311688	90	132	53	77
chr5_134624454_A_G	chr5	134624454	rs13486716	A	G	196.77	N/A	N/A	1180.77	PASS	N/A	N/A	PASS	60	N/A	N/A	60	SYNONYMOUS_CODING	LOW	SILENT	gaT/gaC	D152	Eif4h	protein_coding	ENSMUST00000036125	exon_5_134624441_134624500	A/G	0.25	N/A	N/A	0.604651	7	N/A	N/A	26	28	49	35	43	diff	F4402	0.847458	0.803571	0.857143	0.735294	59	56	70	68
chr6_28244227_A_G	chr6	28244227	rs4225722	A	G	924.77	6921.77	N/A	N/A	PASS	PASS	N/A	N/A	60	60	N/A	N/A	SYNONYMOUS_CODING	LOW	SILENT	gtT/gtC	V246	Zfp800	protein_coding	ENSMUST00000035930	exon_6_28242977_28244663	A/G	0.290909	0.681356	N/A	N/A	32	201	N/A	N/A	110	295	103	159	diff	F4390	0.24	0.641026	0.285714	0.214286	25	39	21	14
chr9_86550015_G_A	chr9	86550015	rs51494368	G	A	255.77	N/A	425.77	N/A	PASS	N/A	PASS	N/A	60	N/A	60	N/A	SYNONYMOUS_CODING	LOW	SILENT	ccG/ccA	P2267	Dopey1	protein_coding	ENSMUST00000034987	exon_9_86550003_86550167	G/A	0.28125	N/A	0.705882	N/A	9	N/A	12	N/A	32	28	17	39	diff	F4393	0.666667	0.8	1	0.777778	6	10	6	9
chr6_17555623_A_G	chr6	17555623	rs33569285	A	G	829.77	4616.77	N/A	N/A	PASS	PASS	N/A	N/A	60	60	N/A	N/A	SYNONYMOUS_CODING	LOW	SILENT	ttA/ttG	L1110	Met	protein_coding	ENSMUST00000080469	exon_6_17555547_17555627	A/G	0.402985	0.668449	N/A	N/A	27	125	N/A	N/A	67	187	62	103	diff	F4390	0	0	0	0.666667	3	1	1	3
chr1_106774142_T_A	chr1	106774142	rs49839167	T	A	272.77	N/A	708.77	N/A	PASS	N/A	PASS	N/A	60	N/A	60	N/A	SYNONYMOUS_CODING	LOW	SILENT	cgA/cgT	R366	Vps4b	protein_coding	ENSMUST00000094646	exon_1_106774007_106774147	T/A	0.3125	N/A	0.714286	N/A	10	N/A	20	N/A	32	36	28	72	diff	F4393	0.535354	0.391753	0.318681	0.506494	99	97	91	77
chr6_35223610_A_G	chr6	35223610	rs39339755	A	G	225.77	2126.77	N/A	N/A	PASS	PASS	N/A	N/A	60	60	N/A	N/A	SYNONYMOUS_CODING	LOW	SILENT	acA/acG	T1136	Nup205	protein_coding	ENSMUST00000043815	exon_6_35223513_35223662	A/G	0.347826	0.743902	N/A	N/A	8	61	N/A	N/A	23	82	34	44	diff	F4390	0.351064	0.80695	0.344262	0.355372	188	518	122	121
chr6_35227512_C_T	chr6	35227512	rs36423561	C	T	578.77	5166.77	N/A	N/A	PASS	PASS	N/A	N/A	60	60	N/A	N/A	SYNONYMOUS_CODING	LOW	SILENT	atC/atT	I1391	Nup205	protein_coding	ENSMUST00000043815	exon_6_35227303_35227570	C/T	0.290323	0.834356	N/A	N/A	18	136	N/A	N/A	62	163	53	64	diff	F4390	0.315068	0.794183	0.336283	0.343434	146	447	113	99
chr6_34746636_G_A	chr6	34746636	rs36933775	G	A	335.77	4013.77	N/A	N/A	PASS	PASS	N/A	N/A	60	60	N/A	N/A	SYNONYMOUS_CODING	LOW	SILENT	acG/acA	T412	Cald1	protein_coding	ENSMUST00000115027	exon_6_34745619_34746639	G/A	0.44	0.828358	N/A	N/A	11	111	N/A	N/A	25	134	30	38	diff	F4390	0	0.770538	0.290323	0	330	353	62	190
chr5_32736908_T_G	chr5	32736908	.	T	G	N/A	216.77	144.77	N/A	N/A	PASS	PASS	N/A	N/A	52.2	51.28	N/A	DOWNSTREAM	MODIFIER	NONE	N/A	N/A	Gm20671	protein_coding	ENSMUST00000144673	N/A	T/G	0	0.344828	0.4	N/A	0	10	6	N/A	31	29	15	37	sim	F4390 F4393	0.4	0.323529	0.56	0.392157	30	34	50	51
chr17_31114509_C_T	chr17	31114509	rs224801914;rs228652534;rs108240124	C	T	N/A	N/A	391.77	518.77	N/A	N/A	PASS	PASS	N/A	N/A	60	60	UTR_3_PRIME	MODIFIER	NONE	N/A	N/A	Abcg1	protein_coding	ENSMUST00000024829	N/A	C/T	0	N/A	0.465517	0.469136	0	N/A	27	38	67	82	58	81	sim	F4393 F4402	0	0	0.833333	0	0	0	6	0
chr1_79704054_G_A	chr1	79704054	rs246937806	G	A	N/A	N/A	611.77	875.77	N/A	N/A	PASS	PASS	N/A	N/A	54.55	55.01	UTR_3_PRIME	MODIFIER	NONE	N/A	N/A	Wdfy1	protein_coding	ENSMUST00000113512	N/A	G/A	0	N/A	0.318182	0.4	0	N/A	21	28	75	78	66	70	sim	F4393 F4402	0.25	0.857143	0.333333	0.625	8	7	6	8
chr6_37332410_A_C	chr6	37332410	.	A	C	98.77	2410.77	N/A	N/A	PASS	PASS	N/A	N/A	60	60	N/A	N/A	DOWNSTREAM	MODIFIER	NONE	N/A	N/A	Creb3l2	protein_coding	ENSMUST00000128534	N/A	A/C	0.208333	0.775281	N/A	N/A	5	69	N/A	N/A	24	89	16	16	diff	F4390	0	0.6	0.2	0	4	10	10	5
chr19_7198956_G_A	chr19	7198956	.	G	A	N/A	162.77	N/A	N/A	N/A	PASS	N/A	N/A	N/A	60	N/A	N/A	DOWNSTREAM	MODIFIER	NONE	N/A	N/A	Macrod1	protein_coding	ENSMUST00000040261	N/A	G/A	0	0.578947	N/A	N/A	0	11	N/A	N/A	12	19	29	20	diff	F4390	0.413793	0.466667	0.3125	0.2	29	30	16	20
chr6_17571989_A_G	chr6	17571989	rs33558142	A	G	N/A	4669.77	N/A	N/A	N/A	PASS	N/A	N/A	N/A	60	N/A	N/A	DOWNSTREAM	MODIFIER	NONE	N/A	N/A	Met	protein_coding	ENSMUST00000080469	N/A	A/G	0	0.525692	N/A	N/A	0	133	N/A	N/A	205	253	160	199	diff	F4390	0	0.5	0	0	0	4	0	2
chr6_34396659_A_G	chr6	34396659	rs36474090	A	G	887.77	6192.77	N/A	N/A	PASS	PASS	N/A	N/A	60	60	N/A	N/A	DOWNSTREAM	MODIFIER	NONE	N/A	N/A	Akr1b10	protein_coding	ENSMUST00000144072	N/A	A/G	0.36	0.812808	N/A	N/A	27	165	N/A	N/A	75	203	76	65	diff	F4390	0.310345	0.871287	0.294118	0.384615	29	101	17	13
chr6_13835688_T_C	chr6	13835688	rs221912029	T	C	928.77	6167.77	N/A	N/A	PASS	PASS	N/A	N/A	60	60	N/A	N/A	DOWNSTREAM	MODIFIER	NONE	N/A	N/A	Gpr85	protein_coding	ENSMUST00000127072	N/A	T/C	0.30303	0.682008	N/A	N/A	30	163	N/A	N/A	99	239	103	147	diff	F4390	0.261438	0.611354	0.235294	0.327586	153	229	102	116
chr6_37328898_A_C	chr6	37328898	rs255440240;rs13466628	A	C	609.77	5642.77	N/A	N/A	PASS	PASS	N/A	N/A	60	60	N/A	N/A	UTR_3_PRIME	MODIFIER	NONE	N/A	N/A	Creb3l2	protein_coding	ENSMUST00000041093	N/A	A/C	0.328125	0.763033	N/A	N/A	21	161	N/A	N/A	64	211	38	81	diff	F4390	0	0.85	0	0	2	20	7	6
chr1_34817253_G_T	chr1	34817253	rs31871849	G	T	398.77	N/A	924.77	N/A	PASS	N/A	PASS	N/A	60	N/A	60	N/A	DOWNSTREAM	MODIFIER	NONE	N/A	N/A	Arhgef4	protein_coding	ENSMUST00000047664	N/A	G/T	0.333333	N/A	0.641026	N/A	14	N/A	25	N/A	42	52	39	45	diff	F4393	0.455399	0.447368	0.511628	0.490991	213	190	172	222
chr1_134490177_G_A	chr1	134490177	rs32250857	G	A	1622.77	N/A	4041.77	N/A	PASS	N/A	PASS	N/A	60	N/A	60	N/A	DOWNSTREAM	MODIFIER	NONE	N/A	N/A	Klhl12	retained_intron	ENSMUST00000141458	N/A	G/A	0.5	N/A	0.771654	N/A	40	N/A	98	N/A	80	58	127	53	diff	F4393	0.581395	0.294118	0.235294	0.555556	43	34	17	36
chr6_34874765_C_T	chr6	34874765	rs258252347	C	T	647.77	3434.77	N/A	N/A	PASS	PASS	N/A	N/A	60	60	N/A	N/A	DOWNSTREAM	MODIFIER	NONE	N/A	N/A	3110062M04Rik	protein_coding	ENSMUST00000140458	N/A	C/T	0.416667	0.838983	N/A	N/A	20	99	N/A	N/A	48	118	31	42	diff	F4390	0	0.666667	0	0	13	15	16	11
chr2_121544443_G_A	chr2	121544443	.	G	A	N/A	N/A	N/A	146.77	N/A	N/A	N/A	PASS	N/A	N/A	N/A	60	DOWNSTREAM	MODIFIER	NONE	N/A	N/A	Frmd5	protein_coding	ENSMUST00000110592	N/A	G/A	0	N/A	N/A	0.233333	0	N/A	N/A	21	71	67	72	90	diff	F4402	0	0	0.272727	0	8	9	11	9
chr6_34391980_A_G	chr6	34391980	rs265378216	A	G	1265.77	8319.77	N/A	N/A	PASS	PASS	N/A	N/A	60	60	N/A	N/A	DOWNSTREAM	MODIFIER	NONE	N/A	N/A	Akr1b10	protein_coding	ENSMUST00000144384	N/A	A/G	0.316176	0.772414	N/A	N/A	43	224	N/A	N/A	136	290	115	125	diff	F4390	0.5	0.8	0	0	4	15	29	10
chr6_37330705_T_C	chr6	37330705	rs246662943	T	C	665.77	5344.77	N/A	N/A	PASS	PASS	N/A	N/A	60	60	N/A	N/A	DOWNSTREAM	MODIFIER	NONE	N/A	N/A	Creb3l2	protein_coding	ENSMUST00000128534	N/A	T/C	0.303371	0.746269	N/A	N/A	27	150	N/A	N/A	89	201	76	75	diff	F4390	0	0.5	0	0	2	6	6	5
chr6_17572941_T_C	chr6	17572941	rs30223658	T	C	1879.77	11439.8	N/A	N/A	PASS	PASS	N/A	N/A	60	60	N/A	N/A	DOWNSTREAM	MODIFIER	NONE	N/A	N/A	Met	protein_coding	ENSMUST00000080469	N/A	T/C	0.220077	0.637019	N/A	N/A	57	265	N/A	N/A	259	416	242	385	diff	F4390	0	0	0	0.333333	2	3	2	12
chrX_59062822_A_G	chrX	59062822	.	A	G	N/A	N/A	N/A	73.41	N/A	N/A	N/A	PASS	N/A	N/A	N/A	51.41	DOWNSTREAM	MODIFIER	NONE	N/A	N/A	Fgf13	protein_coding	ENSMUST00000138503	N/A	A/G	0	N/A	N/A	0.833333	0	N/A	N/A	5	7	8	12	6	diff	F4402	0.8	0.7	1	0.4	5	10	2	10
chr4_132186614_C_A	chr4	132186614	.	C	A	459.73	N/A	961.73	N/A	PASS	N/A	PASS	N/A	60.6	N/A	60.59	N/A	DOWNSTREAM	MODIFIER	NONE	N/A	N/A	Ythdf2	protein_coding	ENSMUST00000102570	N/A	C/A	0.488636	N/A	0.737226	N/A	43	N/A	101	N/A	88	288	137	266	diff	F4393	0.608696	0.736842	0.666667	0.5625	23	19	21	16
chrX_8239479_G_T	chrX	8239479	.	G	T	N/A	168.77	N/A	N/A	N/A	PASS	N/A	N/A	N/A	58.26	N/A	N/A	DOWNSTREAM	MODIFIER	NONE	N/A	N/A	Ftsj1	protein_coding	ENSMUST00000115594	N/A	G/T	0	0.428571	N/A	N/A	0	9	N/A	N/A	39	21	34	41	diff	F4390	0.3	0.5	0.428571	0	10	4	7	193
chr6_130323411_C_A	chr6	130323411	.	C	A	N/A	N/A	N/A	754.77	N/A	N/A	N/A	PASS	N/A	N/A	N/A	41.58	UTR_3_PRIME	MODIFIER	NONE	N/A	N/A	Klra3	protein_coding	ENSMUST00000088017	N/A	C/A	0	N/A	N/A	0.222222	0	N/A	N/A	10	102	120	98	45	diff	F4402	0	0	1	0	1	10	3	8
chr2_60599928_G_A	chr2	60599928	.	G	A	N/A	59.77	N/A	N/A	N/A	PASS	N/A	N/A	N/A	59.64	N/A	N/A	DOWNSTREAM	MODIFIER	NONE	N/A	N/A	Itgb6	protein_coding	ENSMUST00000028348	N/A	G/A	0	0.277778	N/A	N/A	0	10	N/A	N/A	53	36	35	46	diff	F4390	0	0	1	0	2	0	2	0
chr5_96265421_G_T	chr5	96265421	rs228191772;rs257752119	G	T	N/A	N/A	N/A	66.77	N/A	N/A	N/A	PASS	N/A	N/A	N/A	60	UTR_3_PRIME	MODIFIER	NONE	N/A	N/A	Mrpl1	protein_coding	ENSMUST00000036437	N/A	G/T	0	N/A	N/A	0.222222	0	N/A	N/A	8	28	19	19	36	diff	F4402	0.6	0	0	0	5	3	3	4
chr6_25749241_T_C	chr6	25749241	rs46782183	T	C	2234.77	10410.8	N/A	N/A	PASS	PASS	N/A	N/A	60	60	N/A	N/A	INTRON	MODIFIER	NONE	N/A	N/A	Pot1a	protein_coding	ENSMUST00000115330	N/A	T/C	0.328571	0.719481	N/A	N/A	69	277	N/A	N/A	210	385	216	315	diff	F4390	0.5	0.5	0.5	0	8	8	4	35
chr6_34774031_T_C	chr6	34774031	rs13474755	T	C	3873.77	13698.8	N/A	N/A	PASS	PASS	N/A	N/A	60	60	N/A	N/A	DOWNSTREAM	MODIFIER	NONE	N/A	N/A	Cald1	protein_coding	ENSMUST00000031775	N/A	T/C	0.316062	0.796875	N/A	N/A	122	357	N/A	N/A	386	448	482	748	diff	F4390	0.347826	0.790349	0.3	0.309278	115	601	110	97
chr6_34304283_T_C	chr6	34304283	rs8239445	T	C	285.77	2826.77	N/A	N/A	PASS	PASS	N/A	N/A	55.02	50.76	N/A	N/A	DOWNSTREAM	MODIFIER	NONE	N/A	N/A	Akr1b3	retained_intron	ENSMUST00000136559	N/A	T/C	0.22807	0.674419	N/A	N/A	13	87	N/A	N/A	57	129	52	61	diff	F4390	0.30303	0.767802	0.232558	0	132	323	129	101
chr6_37328060_G_A	chr6	37328060	rs13466624	G	A	364.77	4626.77	N/A	N/A	PASS	PASS	N/A	N/A	60	60	N/A	N/A	UTR_3_PRIME	MODIFIER	NONE	N/A	N/A	Creb3l2	protein_coding	ENSMUST00000041093	N/A	G/A	0.254902	0.825806	N/A	N/A	13	128	N/A	N/A	51	155	34	69	diff	F4390	0.428571	0.9375	0.5	0	7	16	10	9
chr6_37332113_T_G	chr6	37332113	rs38126459	T	G	394.77	4053.77	N/A	N/A	PASS	PASS	N/A	N/A	60	60	N/A	N/A	DOWNSTREAM	MODIFIER	NONE	N/A	N/A	Creb3l2	protein_coding	ENSMUST00000128534	N/A	T/G	0.348837	0.791367	N/A	N/A	15	110	N/A	N/A	43	139	40	57	diff	F4390	0	0.636364	0.444444	0	2	11	9	2
chr3_35894311_G_A	chr3	35894311	rs231670674	G	A	N/A	N/A	N/A	186.77	N/A	N/A	N/A	PASS	N/A	N/A	N/A	51.4	DOWNSTREAM	MODIFIER	NONE	N/A	N/A	Dcun1d1	protein_coding	ENSMUST00000128301	N/A	G/A	0	N/A	N/A	0.233333	0	N/A	N/A	7	43	44	51	30	diff	F4402	0.272727	0.38	0.372549	0.21875	44	50	51	32
chr4_43442665_A_C	chr4	43442665	rs32757793	A	C	N/A	N/A	331.77	N/A	N/A	N/A	PASS	N/A	N/A	N/A	60	N/A	DOWNSTREAM	MODIFIER	NONE	N/A	N/A	Cd72	protein_coding	ENSMUST00000098104	N/A	A/C	0	N/A	0.666667	N/A	0	N/A	10	N/A	14	12	15	15	diff	F4393	0	1	0	0.75	4	2	3	4
chr6_25749960_G_C	chr6	25749960	rs265731009	G	C	3135.77	11938.8	N/A	N/A	PASS	PASS	N/A	N/A	60	60	N/A	N/A	INTRON	MODIFIER	NONE	N/A	N/A	Pot1a	protein_coding	ENSMUST00000115330	N/A	G/C	0.316294	0.712054	N/A	N/A	99	319	N/A	N/A	313	448	287	556	diff	F4390	0.5	0.875	0	0	6	8	41	34
chr11_50257072_G_A	chr11	50257072	.	G	A	N/A	N/A	N/A	451.77	N/A	N/A	N/A	PASS	N/A	N/A	N/A	60	UTR_3_PRIME	MODIFIER	NONE	N/A	N/A	Maml1	protein_coding	ENSMUST00000059458	N/A	G/A	0	N/A	N/A	0.288462	0	N/A	N/A	15	63	72	66	52	diff	F4402	0	0	0.548387	0	32	21	31	20
chr9_96944277_C_T	chr9	96944277	rs227135951	C	T	N/A	N/A	N/A	322.77	N/A	N/A	N/A	PASS	N/A	N/A	N/A	60	TRANSCRIPT	MODIFIER	NONE	N/A	N/A	Spsb4	protein_coding	ENSMUST00000159298	N/A	C/T	0	N/A	N/A	0.424242	0	N/A	N/A	14	29	25	22	33	diff	F4402	0	0	0.571429	0	2	8	7	1
chr16_56017065_G_A	chr16	56017065	.	G	A	N/A	N/A	105.77	N/A	N/A	N/A	PASS	N/A	N/A	N/A	40.96	N/A	DOWNSTREAM	MODIFIER	NONE	N/A	N/A	Pcnp	protein_coding	ENSMUST00000096021	N/A	G/A	0	N/A	0.340426	N/A	0	N/A	16	N/A	104	183	47	99	diff	F4393	0.3125	0.234568	0	0.25	48	81	84	40
chr17_33821941_G_A	chr17	33821941	.	G	A	705.77	2051.77	N/A	N/A	PASS	PASS	N/A	N/A	60	60	N/A	N/A	DOWNSTREAM	MODIFIER	NONE	N/A	N/A	Rps28	protein_coding	ENSMUST00000087342	N/A	G/A	0.407407	0.670455	N/A	N/A	22	59	N/A	N/A	54	88	51	48	diff	F4390	0	0	0.4	0	271	333	5	257
chr6_34368262_A_G	chr6	34368262	rs13468960	A	G	771.77	6847.77	N/A	N/A	PASS	PASS	N/A	N/A	60	60	N/A	N/A	DOWNSTREAM	MODIFIER	NONE	N/A	N/A	Akr1b8	protein_coding	ENSMUST00000133370	N/A	A/G	0.396552	0.836283	N/A	N/A	23	189	N/A	N/A	58	226	60	76	diff	F4390	0	0.285714	0.222222	0	3	7	9	11
chr6_25744559_C_T	chr6	25744559	rs217280876	C	T	1149.77	6277.77	N/A	N/A	PASS	PASS	N/A	N/A	60	60	N/A	N/A	DOWNSTREAM	MODIFIER	NONE	N/A	N/A	Pot1a	protein_coding	ENSMUST00000115329	N/A	C/T	0.314516	0.664179	N/A	N/A	39	178	N/A	N/A	124	268	108	228	diff	F4390	0.255319	0.534483	0	0	47	58	45	36
chr6_13835456_G_T	chr6	13835456	rs257771985	G	T	4288.77	11228.8	N/A	N/A	PASS	PASS	N/A	N/A	60	60	N/A	N/A	DOWNSTREAM	MODIFIER	NONE	N/A	N/A	Gpr85	protein_coding	ENSMUST00000127072	N/A	G/T	0.364672	0.71875	N/A	N/A	128	299	N/A	N/A	351	416	384	624	diff	F4390	0	0.241379	0	0	58	87	34	50
chr6_34368328_C_T	chr6	34368328	rs13468961	C	T	1067.77	7930.77	N/A	N/A	PASS	PASS	N/A	N/A	60	60	N/A	N/A	DOWNSTREAM	MODIFIER	NONE	N/A	N/A	Akr1b8	protein_coding	ENSMUST00000133370	N/A	C/T	0.469697	0.826923	N/A	N/A	31	215	N/A	N/A	66	260	74	77	diff	F4390	0	0	0.35	0	2	3	20	4
chr4_75944787_G_T	chr4	75944787	.	G	T	N/A	N/A	N/A	178.73	N/A	N/A	N/A	PASS	N/A	N/A	N/A	60.09	DOWNSTREAM	MODIFIER	NONE	N/A	N/A	Ptprd	protein_coding	ENSMUST00000050757	N/A	G/T	0	N/A	N/A	0.252336	0	N/A	N/A	27	107	97	70	107	diff	F4402	0.27907	0	0	0	43	37	34	35
chr6_17572930_G_A	chr6	17572930	rs30015130	G	A	1879.77	11439.8	N/A	N/A	PASS	PASS	N/A	N/A	60	60	N/A	N/A	DOWNSTREAM	MODIFIER	NONE	N/A	N/A	Met	protein_coding	ENSMUST00000080469	N/A	G/A	0.224	0.643564	N/A	N/A	56	260	N/A	N/A	250	404	247	390	diff	F4390	0	0	0	0.333333	2	3	2	12
chr6_28240701_G_A	chr6	28240701	rs33819871	G	A	5134.77	11212.8	N/A	N/A	PASS	PASS	N/A	N/A	60	60	N/A	N/A	DOWNSTREAM	MODIFIER	NONE	N/A	N/A	Zfp800	protein_coding	ENSMUST00000115321	N/A	G/A	0.33547	0.654584	N/A	N/A	157	307	N/A	N/A	468	469	1048	1562	diff	F4390	0.428571	0.933333	0.4	0.5	7	15	5	10
chr16_20603118_G_A	chr16	20603118	.	G	A	N/A	144.77	N/A	N/A	N/A	PASS	N/A	N/A	N/A	58.98	N/A	N/A	DOWNSTREAM	MODIFIER	NONE	N/A	N/A	Alg3	protein_coding	ENSMUST00000045918	N/A	G/A	0	0.6	N/A	N/A	0	15	N/A	N/A	14	25	15	13	diff	F4390	0	1	0	0	4	2	7	5
chr4_137570259_T_C	chr4	137570259	.	T	C	N/A	N/A	N/A	789.77	N/A	N/A	N/A	PASS	N/A	N/A	N/A	61.46	DOWNSTREAM	MODIFIER	NONE	N/A	N/A	Hspg2	protein_coding	ENSMUST00000155648	N/A	T/C	0	N/A	N/A	0.863636	0	N/A	N/A	19	4	2	7	22	diff	F4402	0	0	0.75	0	0	0	4	1
chr11_104330114_G_A	chr11	104330114	rs258985221;rs225626524	G	A	N/A	N/A	N/A	267.77	N/A	N/A	N/A	PASS	N/A	N/A	N/A	60	DOWNSTREAM	MODIFIER	NONE	N/A	N/A	Kansl1	protein_coding	ENSMUST00000018556	N/A	G/A	0	N/A	N/A	0.209524	0	N/A	N/A	22	118	160	108	105	diff	F4402	0.333333	0	0	0	12	6	4	8
chr16_94694214_G_T	chr16	94694214	.	G	T	N/A	N/A	177.77	N/A	N/A	N/A	PASS	N/A	N/A	N/A	60	N/A	DOWNSTREAM	MODIFIER	NONE	N/A	N/A	Dyrk1a	protein_coding	ENSMUST00000122284	N/A	G/T	0	N/A	0.333333	N/A	0	N/A	10	N/A	44	36	30	41	diff	F4393	0.538462	0.454545	0.533333	0.4	13	22	15	10
chr4_132458875_C_A	chr4	132458875	rs262989598;rs215150353	C	A	N/A	775.77	N/A	N/A	N/A	PASS	N/A	N/A	N/A	60	N/A	N/A	DOWNSTREAM	MODIFIER	NONE	N/A	N/A	Med18	protein_coding	ENSMUST00000123604	N/A	C/A	0	0.84	N/A	N/A	0	21	N/A	N/A	72	25	49	60	diff	F4390	1	1	1	1	13	5	5	6
chr6_37567870_A_G	chr6	37567870	rs39333330	A	G	880.77	4627.77	N/A	N/A	PASS	PASS	N/A	N/A	60	60	N/A	N/A	UTR_3_PRIME	MODIFIER	NONE	N/A	N/A	Akr1d1	protein_coding	ENSMUST00000040987	N/A	A/G	0.358974	0.741176	N/A	N/A	28	126	N/A	N/A	78	170	64	81	diff	F4390	0	1	0	0	0	2	0	0
chr6_34390020_T_A	chr6	34390020	rs36510162	T	A	865.77	10174.8	N/A	N/A	PASS	PASS	N/A	N/A	60	60	N/A	N/A	DOWNSTREAM	MODIFIER	NONE	N/A	N/A	Akr1b10	protein_coding	ENSMUST00000144384	N/A	T/A	0.267857	0.783708	N/A	N/A	30	279	N/A	N/A	112	356	109	161	diff	F4390	0.6	0.911765	0.375	0	10	34	8	20
chr4_132458886_C_A	chr4	132458886	rs234075958	C	A	N/A	775.77	N/A	N/A	N/A	PASS	N/A	N/A	N/A	60	N/A	N/A	DOWNSTREAM	MODIFIER	NONE	N/A	N/A	Med18	protein_coding	ENSMUST00000123604	N/A	C/A	0	0.941176	N/A	N/A	0	16	N/A	N/A	70	17	57	60	diff	F4390	1	1	1	1	12	4	2	6
chr2_83881398_C_A	chr2	83881398	rs240430419;rs258428792	C	A	N/A	388.73	N/A	N/A	N/A	PASS	N/A	N/A	N/A	60	N/A	N/A	UTR_3_PRIME	MODIFIER	NONE	N/A	N/A	Fam171b	protein_coding	ENSMUST00000051454	N/A	C/A	0	0.432	N/A	N/A	0	54	N/A	N/A	125	125	119	138	diff	F4390	0	0	0	0.444444	17	11	8	18
SDCSC.2
_	CHROM	POS	ID	REF	ALT	C_QUAL	R1_QUAL	R2_QUAL	R3_QUAL	C_FILTER	R1_FILTER	R2_FILTER	R3_FILTER	C_MQ	R1_MQ	R2_MQ	R3_MQ	SNPEFF_EFFECT	SNPEFF_IMPACT	SNPEFF_FUNCTIONAL_CLASS	SNPEFF_CODON_CHANGE	SNPEFF_AMINO_ACID_CHANGE	SNPEFF_GENE_NAME	SNPEFF_GENE_BIOTYPE	SNPEFF_TRANSCRIPT_ID	SNPEFF_EXON_ID	SAMPLE_202325.GT	C_ALT_AF	R1_ALT_AF	R2_ALT_AF	R3_ALT_AF	C_ALT_AD	R1_ALT_AD	R2_ALT_AD	R3_ALT_AD	C_DP	R1_DP	R2_DP	R3_DP	SIM_DIFF	SOURCE	Mut_C_EF	Mut_R1_EF	Mut_R2_EF	Mut_R3_EF	Mut_C_E_DP	Mut_R1_E_DP	Mut_R2_E_DP	Mut_R3_E_DP
chr1_179763595_A_G	chr1	179763595	rs32653803	A	G	1962.77	N/A	1209.77	1855.77	PASS	N/A	PASS	PASS	60	N/A	60	60	NON_SYNONYMOUS_CODING	MODERATE	MISSENSE	Ttt/Ctt	F1207L	Ahctf1	protein_coding	ENSMUST00000027768	exon_1_179763470_179763673	A/G	0.42446	N/A	0.970588	0.791045	59	N/A	33	53	139	83	34	67	sim	F3847 F3852	0.493976	0.461538	1	0.925926	83	52	36	27
chr1_180333680_G_A	chr1	180333680	rs245399631	G	A	457.77	N/A	716.77	772.77	PASS	N/A	PASS	PASS	60	N/A	60	60	NON_SYNONYMOUS_CODING	MODERATE	MISSENSE	gGt/gAt	G457D	Itpkb	protein_coding	ENSMUST00000070181	exon_1_180332112_180334230	G/A	0.384615	N/A	1	0.785714	15	N/A	18	22	39	32	18	28	sim	F3847 F3852	0.541667	0.615385	0.75	0.5	24	26	8	4
chr1_179043861_T_C	chr1	179043861	rs13459055	T	C	327.77	N/A	301.78	519.77	PASS	N/A	PASS	PASS	60	N/A	60	60	NON_SYNONYMOUS_CODING	MODERATE	MISSENSE	Aac/Gac	N318D	Smyd3	protein_coding	ENSMUST00000128302	exon_1_179043737_179043911	T/C	0.407407	N/A	1	0.809524	11	N/A	8	17	27	23	8	21	sim	F3847 F3852	0.423077	0.411765	1	0.666667	26	17	15	3
chr13_17989507_T_C	chr13	17989507	rs46515521	T	C	N/A	370.77	219.77	N/A	N/A	PASS	PASS	N/A	N/A	45.52	46	N/A	NON_SYNONYMOUS_CODING	MODERATE	MISSENSE	cAt/cGt	H175R	Yae1d1	protein_coding	ENSMUST00000099735	exon_13_17986640_17989782	T/C	0	0.342857	0.347826	N/A	0	12	8	N/A	247	35	23	105	sim	F3844 F3847	0	0.573333	0.646154	0.530303	591	75	65	66
chr1_180084420_G_A	chr1	180084420	rs226076961	G	A	3200.06	N/A	1859.77	2891.77	PASS	N/A	PASS	PASS	60	N/A	60	60	NON_SYNONYMOUS_CODING	MODERATE	MISSENSE	cGa/cAa	R521Q	Cdc42bpa	protein_coding	ENSMUST00000076687	exon_1_180084372_180084505	G/A	0.462312	N/A	1	0.782178	92	N/A	48	79	199	110	48	101	sim	F3847 F3852	0.617647	0.416667	1	1	34	12	28	7
chr1_181831695_T_C	chr1	181831695	rs13475294	T	C	1433.77	N/A	1236.77	1871.77	PASS	N/A	PASS	PASS	60	N/A	60	60	NON_SYNONYMOUS_CODING	MODERATE	MISSENSE	Aca/Gca	T174A	Lbr	protein_coding	ENSMUST00000005003	exon_1_181831542_181831734	T/C	0.429907	N/A	0.969697	0.75	46	N/A	32	51	107	67	33	68	sim	F3847 F3852	0.574468	0.416667	1	0.96875	141	36	54	32
chr1_179762572_C_T	chr1	179762572	rs31903135;rs228331001	C	T	2179.77	N/A	1762.77	1932.77	PASS	N/A	PASS	PASS	60	N/A	60	60	NON_SYNONYMOUS_CODING	MODERATE	MISSENSE	Gct/Act	A1379T	Ahctf1	protein_coding	ENSMUST00000027768	exon_1_179762545_179762962	C/T	0.492958	N/A	1	0.766234	70	N/A	48	59	142	85	48	77	sim	F3847 F3852	0.78125	0.571429	1	1	32	14	22	24
chr1_178015198_A_C	chr1	178015198	rs31817214	A	C	3091.77	N/A	1814.77	2224.77	PASS	N/A	PASS	PASS	53.44	N/A	46.86	52.28	NON_SYNONYMOUS_CODING	MODERATE	MISSENSE	aAt/aCt	N63T	Gm16432	protein_coding	ENSMUST00000094273	exon_1_178015128_178015201	A/C	0.526012	N/A	1	0.75	91	N/A	47	60	173	92	47	80	sim	F3847 F3852	0	0	0	0.4	3	7	0	5
chr1_179753766_A_T	chr1	179753766	rs32655867	A	T	600.77	N/A	1127.77	921.77	PASS	N/A	PASS	PASS	60	N/A	60	60	NON_SYNONYMOUS_CODING	MODERATE	MISSENSE	Tgc/Agc	C1624S	Ahctf1	protein_coding	ENSMUST00000027768	exon_1_179752311_179754072	A/T	0.365385	N/A	1	0.722222	19	N/A	29	26	52	37	29	36	sim	F3847 F3852	0.444444	0.512821	1	0.925926	81	39	33	27
chr1_181117471_C_T	chr1	181117471	rs32753816	C	T	420.77	N/A	717.77	771.77	PASS	N/A	PASS	PASS	60	N/A	60	60	NON_SYNONYMOUS_CODING	MODERATE	MISSENSE	Gaa/Aaa	E513K	Nvl	protein_coding	ENSMUST00000027797	exon_1_181117436_181117685	C/T	0.371429	N/A	1	0.75	13	N/A	18	21	35	48	18	28	sim	F3847 F3852	0.590164	0.636364	1	0.933333	61	33	26	15
chr17_35380451_G_T	chr17	35380451	.	G	T	N/A	225.77	N/A	N/A	N/A	PASS	N/A	N/A	N/A	57.21	N/A	N/A	NON_SYNONYMOUS_CODING	MODERATE	MISSENSE	cGc/cTc	R170L	H2-Q4	retained_intron	ENSMUST00000081435	exon_17_35380361_35380636	G/T	0	0.203125	N/A	N/A	0	13	N/A	N/A	116	64	113	47	diff	F3844	0.242424	0	0.676056	0	132	805	71	620
chr12_34390216_G_T	chr12	34390216	rs50834600	G	T	466.77	649.77	N/A	N/A	PASS	PASS	N/A	N/A	60	60	N/A	N/A	NON_SYNONYMOUS_CODING	MODERATE	MISSENSE	aCc/aAc	T388N	Hdac9	protein_coding	ENSMUST00000110819	exon_12_34390142_34390352	G/T	0.32	0.689655	N/A	N/A	16	20	N/A	N/A	50	29	63	73	diff	F3844	0.375	0.9	0.322581	0.695652	32	10	62	23
chr1_143760026_C_T	chr1	143760026	rs30972583	C	T	623.77	811.77	N/A	N/A	PASS	PASS	N/A	N/A	60	60	N/A	N/A	NON_SYNONYMOUS_CODING	MODERATE	MISSENSE	Gca/Aca	A461T	Trove2	protein_coding	ENSMUST00000159879	exon_1_143759943_143760089	C/T	0.333333	0.705882	N/A	N/A	20	24	N/A	N/A	60	34	47	69	diff	F3844	0.482759	0.461538	0.603448	0.619048	29	26	58	21
chr1_179753463_T_G	chr1	179753463	rs31659605	T	G	1401.77	N/A	1524.77	N/A	PASS	N/A	PASS	N/A	60	N/A	60	N/A	NON_SYNONYMOUS_CODING	MODERATE	MISSENSE	Agc/Cgc	S1725R	Ahctf1	protein_coding	ENSMUST00000027768	exon_1_179752311_179754072	T/G	0.507042	N/A	1	N/A	36	N/A	36	N/A	71	33	36	30	diff	F3847	0.47619	0.351064	1	0.894737	105	94	31	19
chr18_88979698_T_C	chr18	88979698	rs257419541	T	C	383.77	N/A	512.77	N/A	PASS	N/A	PASS	N/A	60	N/A	60	N/A	NON_SYNONYMOUS_CODING	MODERATE	MISSENSE	Ttt/Ctt	F276L	Rttn	protein_coding	ENSMUST00000023828	exon_18_88979566_88979716	T/C	0.40625	N/A	0.833333	N/A	13	N/A	15	N/A	32	26	18	26	diff	F3847	0.5	0	0.571429	0.4	10	2	21	5
chr17_35028832_G_T	chr17	35028832	rs108772297;rs33561826	G	T	660.77	N/A	1486.77	N/A	PASS	N/A	PASS	N/A	60	N/A	60	N/A	NON_SYNONYMOUS_CODING	MODERATE	MISSENSE	aCg/aAg	T804K	Msh5	processed_transcript	ENSMUST00000007250	exon_17_35028605_35028852	G/T	0.355932	N/A	0.646154	N/A	21	N/A	42	N/A	59	47	65	80	diff	F3847	0.941176	0.8	1	0.454545	34	5	7	11
chr17_33997143_T_C	chr17	33997143	.	T	C	3857.77	N/A	7376.77	N/A	PASS	N/A	PASS	N/A	55.98	N/A	53.58	N/A	NON_SYNONYMOUS_CODING	MODERATE	MISSENSE	Act/Gct	T119A	H2-K1	protein_coding	ENSMUST00000087189	exon_17_33997038_33997157	T/C	0.375862	N/A	0.634218	N/A	109	N/A	215	N/A	290	244	339	414	diff	F3847	0	0	0.555556	0	291	574	18	568
chr17_22374870_A_C	chr17	22374870	rs33768715	A	C	310.77	N/A	N/A	1059.77	PASS	N/A	N/A	PASS	60	N/A	N/A	60	NON_SYNONYMOUS_CODING	MODERATE	MISSENSE	aaA/aaC	K112N	Zfp758	protein_coding	ENSMUST00000149699	exon_17_22374788_22377281	A/C	0.322581	N/A	N/A	0.644444	10	N/A	N/A	29	31	32	30	45	diff	F3852	0.454545	0.666667	0.882353	0.545455	11	9	17	11
chr17_35026403_G_T	chr17	35026403	rs107783804	G	T	644.77	N/A	1636.77	N/A	PASS	N/A	PASS	N/A	59.91	N/A	60	N/A	NON_SYNONYMOUS_CODING	MODERATE	MISSENSE	Cag/Aag	Q135K	Sapcd1	retained_intron	ENSMUST00000040151	exon_17_35025977_35026457	G/T	0.403846	N/A	0.707692	N/A	21	N/A	46	N/A	52	47	65	69	diff	F3847	0.8	0.6	0.8	0.9	5	10	10	10
chr1_184841383_C_T	chr1	184841383	rs13460778	C	T	194.77	N/A	472.77	N/A	PASS	N/A	PASS	N/A	60	N/A	60	N/A	NON_SYNONYMOUS_CODING	MODERATE	MISSENSE	cGc/cAc	R106H	Marc2	protein_coding	ENSMUST00000068725	exon_1_184841254_184841427	C/T	0.380952	N/A	1	N/A	8	N/A	12	N/A	21	18	12	23	diff	F3847	0.54717	0.333333	0.866667	0.428571	53	51	30	14
chr1_179753483_T_C	chr1	179753483	rs32302393	T	C	1084.77	N/A	1436.77	N/A	PASS	N/A	PASS	N/A	60	N/A	60	N/A	NON_SYNONYMOUS_CODING	MODERATE	MISSENSE	cAt/cGt	H1718R	Ahctf1	protein_coding	ENSMUST00000027768	exon_1_179752311_179754072	T/C	0.478261	N/A	1	N/A	33	N/A	38	N/A	69	38	38	32	diff	F3847	0.505495	0.428571	1	0.863636	91	91	28	22
chr14_19817069_T_C	chr14	19817069	.	T	C	N/A	N/A	N/A	215.77	N/A	N/A	N/A	PASS	N/A	N/A	N/A	60	NON_SYNONYMOUS_CODING	MODERATE	MISSENSE	aAc/aGc	N122S	2700060E02Rik	protein_coding	ENSMUST00000022341	exon_14_19817061_19817147	T/C	0	N/A	N/A	0.258065	0	N/A	N/A	8	37	21	34	31	diff	F3852	0	0.6	0	0.717949	466	20	327	39
chr13_13359406_T_C	chr13	13359406	rs48246783	T	C	N/A	N/A	145.77	N/A	N/A	N/A	PASS	N/A	N/A	N/A	51.74	N/A	NON_SYNONYMOUS_CODING	MODERATE	MISSENSE	tAt/tGt	Y355C	Gpr137b	protein_coding	ENSMUST00000021738	exon_13_13357623_13359423	T/C	0	N/A	0.454545	N/A	0	N/A	5	N/A	18	16	11	31	diff	F3847	0.789474	0.672897	0.737705	0.690909	57	107	61	55
chr17_27707905_A_C	chr17	27707905	rs33435921	A	C	247.77	N/A	915.77	N/A	PASS	N/A	PASS	N/A	60	N/A	60	N/A	NON_SYNONYMOUS_CODING	MODERATE	MISSENSE	Aca/Cca	T352P	Pacsin1	protein_coding	ENSMUST00000045896	exon_17_27707880_27708067	A/C	0.363636	N/A	0.777778	N/A	8	N/A	28	N/A	22	34	36	34	diff	F3847	0.764706	0.8	0.9	0.836364	17	5	50	55
chr13_17989625_T_C	chr13	17989625	rs50603381	T	C	498.77	N/A	497.77	N/A	PASS	N/A	PASS	N/A	57.78	N/A	55.45	N/A	NON_SYNONYMOUS_CODING	MODERATE	MISSENSE	Att/Gtt	I136V	Yae1d1	protein_coding	ENSMUST00000099735	exon_13_17986640_17989782	T/C	0.121359	N/A	0.52	N/A	25	N/A	13	N/A	206	60	25	72	diff	F3847	0	0.424242	0.588235	0.479167	682	99	102	96
chr1_179753544_A_G	chr1	179753544	rs32575544	A	G	888.77	N/A	1131.77	N/A	PASS	N/A	PASS	N/A	60	N/A	60	N/A	NON_SYNONYMOUS_CODING	MODERATE	MISSENSE	Tca/Cca	S1698P	Ahctf1	protein_coding	ENSMUST00000027768	exon_1_179752311_179754072	A/G	0.448276	N/A	1	N/A	26	N/A	28	N/A	58	46	28	35	diff	F3847	0.422535	0.451613	1	0.928571	71	62	21	28
chr17_24700324_G_C	chr17	24700324	rs108666100	G	C	546.77	N/A	1843.77	N/A	PASS	N/A	PASS	N/A	60	N/A	60	N/A	NON_SYNONYMOUS_CODING	MODERATE	MISSENSE	gGa/gCa	G340A	Noxo1	protein_coding	ENSMUST00000019464	exon_17_24700121_24700529	G/C	0.425	N/A	0.688312	N/A	17	N/A	53	N/A	40	32	77	58	diff	F3847	0	0	0.571429	0	4	4	7	1
chr17_24397505_G_A	chr17	24397505	rs45868931	G	A	893.77	N/A	1701.77	N/A	PASS	N/A	PASS	N/A	60	N/A	60	N/A	NON_SYNONYMOUS_CODING	MODERATE	MISSENSE	Ggc/Agc	G974S	Abca3	retained_intron	ENSMUST00000039013	exon_17_24397286_24397589	G/A	0.531915	N/A	0.818182	N/A	25	N/A	45	N/A	47	36	55	69	diff	F3847	0.411765	0.263158	0.633333	0.483871	17	19	30	31
chr13_17989411_G_A	chr13	17989411	rs47070183	G	A	N/A	N/A	260.77	N/A	N/A	N/A	PASS	N/A	N/A	N/A	43.94	N/A	NON_SYNONYMOUS_CODING	MODERATE	MISSENSE	gCa/gTa	A207V	Yae1d1	protein_coding	ENSMUST00000099735	exon_13_17986640_17989782	G/A	0	N/A	0.444444	N/A	0	N/A	8	N/A	218	43	18	82	diff	F3847	0	0.282609	0.387755	0.304348	535	46	49	23
chr1_179748643_A_T	chr1	179748643	rs13471301	A	T	648.77	N/A	427.77	N/A	PASS	N/A	PASS	N/A	60	N/A	60	N/A	NON_SYNONYMOUS_CODING	MODERATE	MISSENSE	Tta/Ata	L2125I	Ahctf1	protein_coding	ENSMUST00000027768	exon_1_179748557_179748690	A/T	0.487805	N/A	1	N/A	20	N/A	11	N/A	41	22	11	23	diff	F3847	0.506024	0.426471	0.9375	0.820513	83	68	16	39
chr17_34853867_C_T	chr17	34853867	rs8237907	C	T	811.77	N/A	1871.77	N/A	PASS	N/A	PASS	N/A	60	N/A	60	N/A	NON_SYNONYMOUS_CODING	MODERATE	MISSENSE	gCc/gTc	A155V	Nelfe	protein_coding	ENSMUST00000097343	exon_17_34853808_34854133	C/T	0.491228	N/A	0.753247	N/A	28	N/A	58	N/A	57	48	77	56	diff	F3847	0.55	0.294118	0.766355	0.742424	100	34	107	66
chr17_44101913_C_T	chr17	44101913	rs256632292	C	T	763.77	N/A	1840.77	N/A	PASS	N/A	PASS	N/A	60	N/A	60	N/A	NON_SYNONYMOUS_CODING	MODERATE	MISSENSE	atG/atA	M243I	Enpp4	protein_coding	ENSMUST00000024757	exon_17_44101807_44102664	C/T	0.442308	N/A	0.726027	N/A	23	N/A	53	N/A	52	49	73	70	diff	F3847	0	0.5	0.571429	0	2	14	7	3
chr12_4267865_G_A	chr12	4267865	.	G	A	1045.77	N/A	2301.77	N/A	PASS	N/A	PASS	N/A	60	N/A	60	N/A	NON_SYNONYMOUS_CODING	MODERATE	MISSENSE	Ctc/Ttc	L1156F	Ncoa1	protein_coding	ENSMUST00000085814	exon_12_4267607_4268009	G/A	0.517241	N/A	0.967213	N/A	30	N/A	59	N/A	58	85	61	90	diff	F3847	0.433333	0.25	0.9	0.411765	30	16	20	17
chr18_88979660_G_A	chr18	88979660	rs37838090	G	A	390.77	N/A	661.77	N/A	PASS	N/A	PASS	N/A	60	N/A	60	N/A	NON_SYNONYMOUS_CODING	MODERATE	MISSENSE	aGc/aAc	S263N	Rttn	protein_coding	ENSMUST00000023828	exon_18_88979566_88979716	G/A	0.388889	N/A	0.782609	N/A	14	N/A	18	N/A	36	29	23	32	diff	F3847	0.6	0	0.5	0	5	3	16	1
chr16_14220003_C_A	chr16	14220003	rs51806635	C	A	N/A	N/A	N/A	230.77	N/A	N/A	N/A	PASS	N/A	N/A	N/A	60	NON_SYNONYMOUS_CODING	MODERATE	MISSENSE	Gct/Tct	A906S	Myh11	protein_coding	ENSMUST00000090287	exon_16_14219860_14220066	C/A	0	N/A	N/A	0.333333	0	N/A	N/A	8	23	25	29	24	diff	F3852	0	1	0	1	0	16	0	7
chr13_17989601_C_T	chr13	17989601	rs46320765	C	T	442.77	N/A	527.77	N/A	PASS	N/A	PASS	N/A	57.52	N/A	54.61	N/A	NON_SYNONYMOUS_CODING	MODERATE	MISSENSE	Gta/Ata	V144I	Yae1d1	protein_coding	ENSMUST00000099735	exon_13_17986640_17989782	C/T	0.123348	N/A	0.516129	N/A	28	N/A	16	N/A	227	67	31	74	diff	F3847	0	0.433333	0.643564	0.469388	629	90	101	98
chr1_179753456_T_C	chr1	179753456	rs30904605	T	C	1401.77	N/A	1524.77	N/A	PASS	N/A	PASS	N/A	60	N/A	60	N/A	NON_SYNONYMOUS_CODING	MODERATE	MISSENSE	aAt/aGt	N1727S	Ahctf1	protein_coding	ENSMUST00000027768	exon_1_179752311_179754072	T/C	0.493333	N/A	1	N/A	37	N/A	30	N/A	75	27	30	27	diff	F3847	0.453608	0.325581	1	0.913043	97	86	34	23
chr5_32738412_T_C	chr5	32738412	.	T	C	N/A	92.77	N/A	N/A	N/A	PASS	N/A	N/A	N/A	46.57	N/A	N/A	NON_SYNONYMOUS_CODING	MODERATE	MISSENSE	Atc/Gtc	I240V	Pisd	protein_coding	ENSMUST00000071829	exon_5_32738388_32738534	T/C	0	0.571429	N/A	N/A	0	4	N/A	N/A	14	7	18	13	diff	F3844	0.652174	0.36	0.2	0	23	25	10	90
chr1_179753818_G_A	chr1	179753818	rs30948345	G	A	576.77	N/A	1174.77	736.77	PASS	N/A	PASS	PASS	60	N/A	60	60	SYNONYMOUS_CODING	LOW	SILENT	agC/agT	S1606	Ahctf1	protein_coding	ENSMUST00000027768	exon_1_179752311_179754072	G/A	0.404255	N/A	1	0.821429	19	N/A	32	23	47	30	32	28	sim	F3847 F3852	0.479167	0.545455	1	0.972973	96	44	36	37
chr1_180074589_A_G	chr1	180074589	rs32673946	A	G	4166.77	N/A	3217.75	5054.77	PASS	N/A	PASS	PASS	60	N/A	60	60	SYNONYMOUS_CODING	LOW	SILENT	caA/caG	Q470	Cdc42bpa	protein_coding	ENSMUST00000076687	exon_1_180074570_180074692	A/G	0.478927	N/A	0.975309	0.788235	125	N/A	79	134	261	160	81	170	sim	F3847 F3852	0.8	0.666667	1	0.941176	15	6	16	17
chr1_179753791_C_T	chr1	179753791	rs32655869	C	T	652.77	N/A	1307.77	882.77	PASS	N/A	PASS	PASS	60	N/A	60	60	SYNONYMOUS_CODING	LOW	SILENT	ccG/ccA	P1615	Ahctf1	protein_coding	ENSMUST00000027768	exon_1_179752311_179754072	C/T	0.388889	N/A	1	0.714286	21	N/A	34	25	54	33	34	35	sim	F3847 F3852	0.463636	0.5	1	0.970588	110	44	46	34
chr1_191582406_G_A	chr1	191582406	rs33838395	G	A	916.77	N/A	1445.77	1368.77	PASS	N/A	PASS	PASS	60	N/A	60	60	SYNONYMOUS_CODING	LOW	SILENT	agG/agA	R34	Ints7	protein_coding	ENSMUST00000045450	exon_1_191582399_191582528	G/A	0.430769	N/A	0.973684	0.76	28	N/A	37	38	65	56	38	50	sim	F3847 F3852	0.924242	0	1	1	66	49	44	18
chr1_179763518_T_A	chr1	179763518	rs32653800	T	A	2476.77	N/A	1847.77	2242.77	PASS	N/A	PASS	PASS	60	N/A	60	60	SYNONYMOUS_CODING	LOW	SILENT	acA/acT	T1232	Ahctf1	protein_coding	ENSMUST00000027768	exon_1_179763470_179763673	T/A	0.507143	N/A	0.979167	0.743902	71	N/A	47	61	140	87	48	82	sim	F3847 F3852	0.6	0.62069	1	0.866667	55	29	28	15
chr17_34064203_C_T	chr17	34064203	rs49469838	C	T	N/A	173.77	367.77	N/A	N/A	PASS	PASS	N/A	N/A	60	60	N/A	SYNONYMOUS_CODING	LOW	SILENT	atC/atT	I1468	Col11a2	protein_coding	ENSMUST00000087497	exon_17_34064024_34064291	C/T	0	0.285714	0.571429	N/A	0	6	12	N/A	29	21	21	10	sim	F3844 F3847	0.666667	0.563636	0.692308	1	3	55	26	3
chr1_181134957_C_T	chr1	181134957	rs13468389	C	T	1102.77	N/A	1285.77	1309.77	PASS	N/A	PASS	PASS	60	N/A	60	60	SYNONYMOUS_CODING	LOW	SILENT	acG/acA	T149	Nvl	protein_coding	ENSMUST00000027797	exon_1_181134792_181135064	C/T	0.432099	N/A	1	0.795918	35	N/A	33	39	81	57	33	49	sim	F3847 F3852	0.424658	0.292683	1	0.969697	73	41	44	33
chr1_179769018_C_T	chr1	179769018	rs32657722	C	T	1735.77	N/A	2252.77	2437.77	PASS	N/A	PASS	PASS	60	N/A	60	60	SYNONYMOUS_CODING	LOW	SILENT	gaG/gaA	E1070	Ahctf1	protein_coding	ENSMUST00000027768	exon_1_179768989_179769139	C/T	0.482759	N/A	0.982759	0.772727	56	N/A	57	68	116	75	58	88	sim	F3847 F3852	0.763158	0.666667	1	1	38	12	25	22
chr1_179784103_C_T	chr1	179784103	rs32653896	C	T	6037.77	N/A	4910.77	5718.77	PASS	N/A	PASS	PASS	60	N/A	60	60	SYNONYMOUS_CODING	LOW	SILENT	acG/acA	T567	Ahctf1	protein_coding	ENSMUST00000027768	exon_1_179784090_179784180	C/T	0.473118	N/A	0.968992	0.782828	176	N/A	125	155	372	187	129	198	sim	F3847 F3852	0.846154	0.571429	0.972222	1	26	7	36	24
chr1_180421313_C_T	chr1	180421313	rs32709252	C	T	693.77	N/A	528.18	943.96	PASS	N/A	PASS	PASS	60	N/A	60	60	SYNONYMOUS_CODING	LOW	SILENT	acC/acT	T860	Itpkb	protein_coding	ENSMUST00000070181	exon_1_180421275_180421346	C/T	0.511628	N/A	0.9375	0.928571	22	N/A	15	26	43	29	16	28	sim	F3847 F3852	0.6	0.764706	1	0.7	15	34	7	10
chr13_17989485_T_C	chr13	17989485	rs253272079;rs51214543;rs227413331	T	C	N/A	247.77	131.77	N/A	N/A	PASS	PASS	N/A	N/A	40	39.93	N/A	SYNONYMOUS_CODING	LOW	SILENT	gcA/gcG	A182	Yae1d1	protein_coding	ENSMUST00000099735	exon_13_17986640_17989782	T/C	0	0.36	0.333333	N/A	0	9	5	N/A	227	25	15	99	sim	F3844 F3847	0	0.517857	0.555556	0.52	632	56	45	50
chr1_180229432_G_A	chr1	180229432	rs243673074	G	A	110.77	N/A	390.22	562.77	PASS	N/A	PASS	PASS	60	N/A	60	60	SYNONYMOUS_CODING	LOW	SILENT	gcC/gcT	A341	Psen2	protein_coding	ENSMUST00000111104	exon_1_180229386_180229484	G/A	0.333333	N/A	0.923077	0.769231	6	N/A	12	20	18	14	13	26	sim	F3847 F3852	0.333333	0	1	0	6	10	8	4
chr1_179752506_G_A	chr1	179752506	rs32653726	G	A	1850.77	N/A	1515.77	633.77	PASS	N/A	PASS	PASS	60	N/A	60	60	SYNONYMOUS_CODING	LOW	SILENT	Ctg/Ttg	L2044	Ahctf1	protein_coding	ENSMUST00000027768	exon_1_179752311_179754072	G/A	0.504587	N/A	1	0.818182	55	N/A	37	18	109	72	37	22	sim	F3847 F3852	0.418182	0.478261	1	1	55	46	26	27
chr1_191586593_G_A	chr1	191586593	rs33836324	G	A	336.77	N/A	627.77	1120.77	PASS	N/A	PASS	PASS	60	N/A	60	60	SYNONYMOUS_CODING	LOW	SILENT	ctG/ctA	L147	Ints7	protein_coding	ENSMUST00000045450	exon_1_191586524_191586661	G/A	0.423077	N/A	1	0.882353	11	N/A	17	30	26	23	17	34	sim	F3847 F3852	0.534247	0.461538	1	1	73	26	25	25
chr1_179776029_C_T	chr1	179776029	rs32424340	C	T	3904.77	N/A	3482.77	3520.77	PASS	N/A	PASS	PASS	60	N/A	60	60	SYNONYMOUS_CODING	LOW	SILENT	ctG/ctA	L817	Ahctf1	protein_coding	ENSMUST00000027768	exon_1_179776008_179776154	C/T	0.470833	N/A	0.988636	0.811966	113	N/A	87	95	240	124	88	117	sim	F3847 F3852	0.888889	0.7	1	1	27	20	38	28
chr17_45408366_A_G	chr17	45408366	rs50562643	A	G	226.77	N/A	1119.77	N/A	PASS	N/A	PASS	N/A	60	N/A	60	N/A	SYNONYMOUS_CODING	LOW	SILENT	gcT/gcC	A540	Cdc5l	protein_coding	ENSMUST00000024727	exon_17_45408336_45408416	A/G	0.322581	N/A	0.744186	N/A	10	N/A	32	N/A	31	14	43	34	diff	F3847	0.798246	0.75	0.868421	0.907895	114	28	114	76
chr1_179610525_C_T	chr1	179610525	rs13476265	C	T	860.77	N/A	1008.77	N/A	PASS	N/A	PASS	N/A	60	N/A	60	N/A	SYNONYMOUS_CODING	LOW	SILENT	taC/taT	Y551	Cnst	protein_coding	ENSMUST00000040706	exon_1_179609786_179610666	C/T	0.464286	N/A	1	N/A	26	N/A	25	N/A	56	44	25	31	diff	F3847	0.485714	0.4375	1	0.944444	35	16	13	18
chr1_179043892_C_T	chr1	179043892	rs222845856	C	T	443.77	N/A	318.78	N/A	PASS	N/A	PASS	N/A	60	N/A	60	N/A	SYNONYMOUS_CODING	LOW	SILENT	gcG/gcA	A307	Smyd3	protein_coding	ENSMUST00000128302	exon_1_179043737_179043911	C/T	0.451613	N/A	1	N/A	14	N/A	9	N/A	31	27	9	16	diff	F3847	0.346154	0.545455	1	0.666667	26	22	14	3
chr12_34390181_G_A	chr12	34390181	rs38517973	G	A	611.77	683.77	N/A	N/A	PASS	PASS	N/A	N/A	60	60	N/A	N/A	SYNONYMOUS_CODING	LOW	SILENT	Ctg/Ttg	L400	Hdac9	protein_coding	ENSMUST00000110819	exon_12_34390142_34390352	G/A	0.37037	0.740741	N/A	N/A	20	20	N/A	N/A	54	27	51	93	diff	F3844	0.48	1	0.439024	0.75	25	10	41	16
chr17_50607875_G_A	chr17	50607875	rs48444289	G	A	919.77	N/A	1536.77	N/A	PASS	N/A	PASS	N/A	60	N/A	60	N/A	SYNONYMOUS_CODING	LOW	SILENT	tcG/tcA	S637	Plcl2	protein_coding	ENSMUST00000043938	exon_17_50606295_50608781	G/A	0.411765	N/A	0.672131	N/A	28	N/A	41	N/A	68	33	61	77	diff	F3847	0.414634	0.357143	0.522727	0.681818	41	14	44	44
chr1_184822399_G_A	chr1	184822399	rs13460779	G	A	471.77	N/A	799.77	N/A	PASS	N/A	PASS	N/A	60	N/A	60	N/A	SYNONYMOUS_CODING	LOW	SILENT	Ctg/Ttg	L183	42431	protein_coding	ENSMUST00000161821	exon_1_184822375_184822406	G/A	0.483871	N/A	1	N/A	15	N/A	22	N/A	31	26	22	22	diff	F3847	0.381579	0.413793	0.945946	0.636364	76	58	37	22
chr15_76881132_C_T	chr15	76881132	rs33885597	C	T	629.77	N/A	N/A	937.77	PASS	N/A	N/A	PASS	60	N/A	N/A	60	SYNONYMOUS_CODING	LOW	SILENT	gaC/gaT	D8	Zfp7	protein_coding	ENSMUST00000023179	exon_15_76881112_76881238	C/T	0.377358	N/A	N/A	0.682927	20	N/A	N/A	28	53	37	40	41	diff	F3852	0.75	0.777778	1	0	8	9	3	3
chr17_50607725_G_A	chr17	50607725	rs256013381	G	A	835.77	N/A	1594.77	N/A	PASS	N/A	PASS	N/A	60	N/A	60	N/A	SYNONYMOUS_CODING	LOW	SILENT	gaG/gaA	E587	Plcl2	protein_coding	ENSMUST00000043938	exon_17_50606295_50608781	G/A	0.342105	N/A	0.613333	N/A	26	N/A	46	N/A	76	51	75	90	diff	F3847	0.269231	0.45	0.707317	0.518519	26	20	41	54
chr17_31338016_C_T	chr17	31338016	rs52010903	C	T	N/A	N/A	N/A	266.77	N/A	N/A	N/A	PASS	N/A	N/A	N/A	60	SYNONYMOUS_CODING	LOW	SILENT	tcC/tcT	S385	Slc37a1	protein_coding	ENSMUST00000165149	exon_17_31337991_31338076	C/T	0	N/A	N/A	0.2	0	N/A	N/A	12	37	39	34	60	diff	F3852	0	0.833333	0	0.666667	3	6	2	6
chr13_17989659_T_C	chr13	17989659	rs46315138;rs265713122	T	C	381.77	N/A	454.77	N/A	PASS	N/A	PASS	N/A	55.3	N/A	52.93	N/A	SYNONYMOUS_CODING	LOW	SILENT	acA/acG	T124	Yae1d1	protein_coding	ENSMUST00000099735	exon_13_17986640_17989782	T/C	0.103226	N/A	0.590909	N/A	16	N/A	13	N/A	155	62	22	58	diff	F3847	0	0.446809	0.595506	0.397436	636	94	89	78
chr17_50607863_G_A	chr17	50607863	rs221521454	G	A	975.77	N/A	1505.77	N/A	PASS	N/A	PASS	N/A	60	N/A	60	N/A	SYNONYMOUS_CODING	LOW	SILENT	gaG/gaA	E633	Plcl2	protein_coding	ENSMUST00000043938	exon_17_50606295_50608781	G/A	0.414286	N/A	0.645161	N/A	29	N/A	40	N/A	70	33	62	84	diff	F3847	0.410256	0.4375	0.55102	0.612245	39	16	49	49
chr19_6481781_A_G	chr19	6481781	rs245641117	A	G	147.77	N/A	N/A	355.77	PASS	N/A	N/A	PASS	60	N/A	N/A	60	SYNONYMOUS_CODING	LOW	SILENT	gcA/gcG	A734	Nrxn2	protein_coding	ENSMUST00000113461	exon_19_6481672_6481875	A/G	0.184211	N/A	N/A	0.565217	7	N/A	N/A	13	38	28	34	23	diff	F3852	0.380952	0.727273	0.488889	0.371429	21	11	45	35
chr17_24499338_C_T	chr17	24499338	rs50017331	C	T	679.77	N/A	1591.77	N/A	PASS	N/A	PASS	N/A	60	N/A	60	N/A	SYNONYMOUS_CODING	LOW	SILENT	gaC/gaT	D307	Caskin1	protein_coding	ENSMUST00000024958	exon_17_24499253_24499347	C/T	0.488889	N/A	0.862745	N/A	22	N/A	44	N/A	45	34	51	49	diff	F3847	0.25	0.5	0.714286	0.625	8	10	28	16
chr17_50607824_C_A	chr17	50607824	.	C	A	972.77	N/A	1662.77	N/A	PASS	N/A	PASS	N/A	60	N/A	60	N/A	SYNONYMOUS_CODING	LOW	SILENT	tcC/tcA	S620	Plcl2	protein_coding	ENSMUST00000043938	exon_17_50606295_50608781	C/A	0.391892	N/A	0.631579	N/A	29	N/A	48	N/A	74	33	76	94	diff	F3847	0.451613	0.444444	0.585366	0.536585	31	18	41	41
chr13_17989634_A_G	chr13	17989634	rs48005007	A	G	498.77	N/A	497.77	N/A	PASS	N/A	PASS	N/A	58.06	N/A	56.1	N/A	SYNONYMOUS_CODING	LOW	SILENT	Ttg/Ctg	L133	Yae1d1	protein_coding	ENSMUST00000099735	exon_13_17986640_17989782	A/G	0.116751	N/A	0.5	N/A	23	N/A	13	N/A	197	61	26	73	diff	F3847	0	0.42	0.583333	0.458824	649	100	96	85
chr16_91926480_T_C	chr16	91926480	rs33598667	T	C	643.77	996.77	N/A	N/A	PASS	PASS	N/A	N/A	59.96	59.34	N/A	N/A	SYNONYMOUS_CODING	LOW	SILENT	ccA/ccG	P140	Atp5o	protein_coding	ENSMUST00000023677	exon_16_91926459_91926571	T/C	0.403846	0.717949	N/A	N/A	21	28	N/A	N/A	52	39	39	37	diff	F3844	0.612717	0.832353	0.815789	0.576577	692	340	304	222
chr1_191575881_G_T	chr1	191575881	rs33841111	G	T	172.77	N/A	406.77	N/A	PASS	N/A	PASS	N/A	60	N/A	60	N/A	SYNONYMOUS_CODING	LOW	SILENT	tcG/tcT	S8	Ints7	protein_coding	ENSMUST00000045450	exon_1_191575763_191575951	G/T	0.368421	N/A	1	N/A	7	N/A	11	N/A	19	12	11	8	diff	F3847	0.533333	0.596491	0.975	0.9	105	57	40	20
chr1_179795874_G_A	chr1	179795874	rs32659250	G	A	795.77	N/A	765.77	N/A	PASS	N/A	PASS	N/A	60	N/A	60	N/A	SYNONYMOUS_CODING	LOW	SILENT	Cta/Tta	L60	Ahctf1	protein_coding	ENSMUST00000027768	exon_1_179795677_179795930	G/A	0.46	N/A	1	N/A	23	N/A	18	N/A	50	46	18	35	diff	F3847	0.365854	0.275862	1	0.866667	41	29	29	15
chr14_108911595_C_T	chr14	108911595	.	C	T	278.77	N/A	N/A	832.77	PASS	N/A	N/A	PASS	60	N/A	N/A	60	SYNONYMOUS_CODING	LOW	SILENT	ccG/ccA	P561	Slitrk1	protein_coding	ENSMUST00000100322	exon_14_108909991_108914239	C/T	0.454545	N/A	N/A	0.88	10	N/A	N/A	22	22	23	27	25	diff	F3852	0.5	0.714286	0	0.777778	4	7	0	9
chr1_156625487_T_C	chr1	156625487	rs45853704	T	C	249.77	N/A	746.77	N/A	PASS	N/A	PASS	N/A	60	N/A	60	N/A	SYNONYMOUS_CODING	LOW	SILENT	gtT/gtC	V197	Abl2	protein_coding	ENSMUST00000027888	exon_1_156625288_156625583	T/C	0.28125	N/A	0.636364	N/A	9	N/A	21	N/A	32	30	33	40	diff	F3847	0.45	1	0.652174	0.666667	20	5	23	12
chr1_156625541_A_G	chr1	156625541	rs49186069	A	G	170.77	N/A	452.77	N/A	PASS	N/A	PASS	N/A	60	N/A	60	N/A	SYNONYMOUS_CODING	LOW	SILENT	ggA/ggG	G215	Abl2	protein_coding	ENSMUST00000027888	exon_1_156625288_156625583	A/G	0.233333	N/A	0.684211	N/A	7	N/A	13	N/A	30	23	19	33	diff	F3847	0.6875	0	0.62963	0.444444	16	5	27	9
chr17_51742748_A_G	chr17	51742748	rs108829291	A	G	428.77	N/A	N/A	1176.77	PASS	N/A	N/A	PASS	60	N/A	N/A	60	SYNONYMOUS_CODING	LOW	SILENT	ccT/ccC	P559	Satb1	protein_coding	ENSMUST00000024720	exon_17_51742646_51742849	A/G	0.380952	N/A	N/A	0.68	16	N/A	N/A	34	42	18	39	50	diff	F3852	0.439394	0.45	0.652174	0.66055	66	40	92	109
chr17_44080921_C_T	chr17	44080921	.	C	T	1151.77	N/A	1949.77	N/A	PASS	N/A	PASS	N/A	60	N/A	60	N/A	SYNONYMOUS_CODING	LOW	SILENT	gtC/gtT	V80	Enpp5	protein_coding	ENSMUST00000024756	exon_17_44080647_44081510	C/T	0.461538	N/A	0.695122	N/A	36	N/A	57	N/A	78	32	82	87	diff	F3847	0.555556	0.5	0.809524	0.473684	9	14	21	19
chr17_50607980_C_T	chr17	50607980	rs50061351	C	T	480.77	N/A	1112.77	N/A	PASS	N/A	PASS	N/A	60	N/A	60	N/A	SYNONYMOUS_CODING	LOW	SILENT	ttC/ttT	F672	Plcl2	protein_coding	ENSMUST00000043938	exon_17_50606295_50608781	C/T	0.405405	N/A	0.704545	N/A	15	N/A	31	N/A	37	32	44	48	diff	F3847	0.540541	0.272727	0.5	0.57377	37	22	52	61
chr17_50607683_G_A	chr17	50607683	rs229913486	G	A	625.77	N/A	1549.77	N/A	PASS	N/A	PASS	N/A	60	N/A	60	N/A	SYNONYMOUS_CODING	LOW	SILENT	ctG/ctA	L573	Plcl2	protein_coding	ENSMUST00000043938	exon_17_50606295_50608781	G/A	0.308824	N/A	0.623188	N/A	21	N/A	43	N/A	68	44	69	79	diff	F3847	0.322581	0.37037	0.68	0.64	31	27	50	50
chr17_24158470_G_A	chr17	24158470	rs13466214	G	A	847.77	N/A	1423.77	N/A	PASS	N/A	PASS	N/A	60	N/A	60	N/A	SYNONYMOUS_CODING	LOW	SILENT	ccC/ccT	P156	Amdhd2	processed_transcript	ENSMUST00000040735	exon_17_24158310_24158522	G/A	0.402985	N/A	0.719298	N/A	27	N/A	41	N/A	67	48	57	88	diff	F3847	0.347826	0.366667	0.529412	0.642857	46	30	34	14
chr17_50607926_G_T	chr17	50607926	rs260959786	G	T	673.77	N/A	1149.77	N/A	PASS	N/A	PASS	N/A	60	N/A	60	N/A	SYNONYMOUS_CODING	LOW	SILENT	gcG/gcT	A654	Plcl2	protein_coding	ENSMUST00000043938	exon_17_50606295_50608781	G/T	0.392157	N/A	0.659574	N/A	20	N/A	31	N/A	51	23	47	60	diff	F3847	0.475	0	0.512195	0.644068	40	16	41	59
chr1_179609904_G_A	chr1	179609904	rs31844992	G	A	298.77	N/A	419.77	N/A	PASS	N/A	PASS	N/A	60	N/A	60	N/A	SYNONYMOUS_CODING	LOW	SILENT	ggG/ggA	G344	Cnst	protein_coding	ENSMUST00000040706	exon_1_179609786_179610666	G/A	0.454545	N/A	1	N/A	10	N/A	12	N/A	22	20	12	10	diff	F3847	0.557377	0.526316	0.909091	0.8	61	19	22	15
chr17_24852882_C_T	chr17	24852882	rs13461757	C	T	614.77	N/A	1225.77	N/A	PASS	N/A	PASS	N/A	60	N/A	60	N/A	SYNONYMOUS_CODING	LOW	SILENT	atC/atT	I27	Hagh	protein_coding	ENSMUST00000024974	exon_17_24852731_24852906	C/T	0.413043	N/A	0.686275	N/A	19	N/A	35	N/A	46	32	51	58	diff	F3847	0.546875	0.487179	0.747368	0.653061	64	39	95	49
chr16_45157633_C_T	chr16	45157633	.	C	T	684.77	898.77	N/A	N/A	PASS	PASS	N/A	N/A	60	60	N/A	N/A	SYNONYMOUS_CODING	LOW	SILENT	ggG/ggA	G14	Slc35a5	protein_coding	ENSMUST00000114600	exon_16_45157461_45157646	C/T	0.415094	0.710526	N/A	N/A	22	27	N/A	N/A	53	38	44	50	diff	F3844	0.333333	0.555556	0.5	0.307692	9	18	24	13
chr1_139479676_A_T	chr1	139479676	rs51515710	A	T	463.77	N/A	1192.77	N/A	PASS	N/A	PASS	N/A	60	N/A	60	N/A	SYNONYMOUS_CODING	LOW	SILENT	tcA/tcT	S2100	Aspm	retained_intron	ENSMUST00000053364	exon_1_139477346_139481140	A/T	0.3125	N/A	0.583333	N/A	15	N/A	35	N/A	48	32	60	53	diff	F3847	0.505882	0.285714	0.508197	0.540541	85	14	61	37
chr1_190911607_G_A	chr1	190911607	rs36516068	G	A	480.77	N/A	516.41	N/A	PASS	N/A	PASS	N/A	60	N/A	60	N/A	SYNONYMOUS_CODING	LOW	SILENT	acC/acT	T18	Rps6kc1	nonsense_mediated_decay	ENSMUST00000061611	exon_1_190911556_190911770	G/A	0.447368	N/A	0.9375	N/A	17	N/A	15	N/A	38	26	16	3	diff	F3847	0.769231	0	1	0.714286	13	9	12	7
chr15_34316582_C_T	chr15	34316582	rs254437501	C	T	132.77	N/A	503.77	N/A	PASS	N/A	PASS	N/A	60	N/A	60	N/A	SYNONYMOUS_CODING	LOW	SILENT	ggC/ggT	G23	Matn2	protein_coding	ENSMUST00000022947	exon_15_34316491_34316655	C/T	0.318182	N/A	0.761905	N/A	7	N/A	16	N/A	22	14	21	33	diff	F3847	0	0.581395	0.833333	0	1	43	6	2
chr1_184905483_G_A	chr1	184905483	rs31733155	G	A	946.77	N/A	669.77	N/A	PASS	N/A	PASS	N/A	60	N/A	60	N/A	SYNONYMOUS_CODING	LOW	SILENT	caC/caT	H636	Mark1	protein_coding	ENSMUST00000027929	exon_1_184905403_184905654	G/A	0.571429	N/A	1	N/A	28	N/A	17	N/A	49	50	17	17	diff	F3847	0.666667	0.4	0.933333	0.714286	21	10	15	7
chr1_190911574_G_T	chr1	190911574	rs37654660	G	T	467.77	N/A	500.74	N/A	PASS	N/A	PASS	N/A	60	N/A	60	N/A	SYNONYMOUS_CODING	LOW	SILENT	gtC/gtA	V29	Rps6kc1	nonsense_mediated_decay	ENSMUST00000061611	exon_1_190911556_190911770	G/T	0.447368	N/A	0.9375	N/A	17	N/A	15	N/A	38	25	16	3	diff	F3847	0.833333	0	1	0.75	12	13	13	8
chr17_34112707_C_T	chr17	34112707	rs13474209	C	T	787.77	N/A	2072.77	N/A	PASS	N/A	PASS	N/A	60	N/A	60	N/A	SYNONYMOUS_CODING	LOW	SILENT	gcG/gcA	A363	Brd2	protein_coding	ENSMUST00000095347	exon_17_34112363_34112708	C/T	0.442308	N/A	0.717949	N/A	23	N/A	56	N/A	52	49	78	83	diff	F3847	0.486653	0.436364	0.680473	0.617699	487	330	507	565
chr17_40934761_C_T	chr17	40934761	rs33814304	C	T	615.77	N/A	N/A	610.77	PASS	N/A	N/A	PASS	60	N/A	N/A	60	START_GAINED	LOW	NONE	N/A	N/A	Cenpq	protein_coding	ENSMUST00000087114	exon_17_40934383_40935047	C/T	0.422222	N/A	N/A	0.791667	19	N/A	N/A	19	45	43	60	24	diff	F3852	0.615385	0.666667	0.75	0.666667	13	15	24	9
chr1_178015160_G_A	chr1	178015160	rs31335655	G	A	4282.77	N/A	2751.77	N/A	PASS	N/A	PASS	N/A	54.1	N/A	50.95	N/A	SYNONYMOUS_CODING	LOW	SILENT	gtG/gtA	V50	Gm16432	protein_coding	ENSMUST00000094273	exon_1_178015128_178015201	G/A	0.542601	N/A	1	N/A	121	N/A	67	N/A	223	110	67	94	diff	F3847	0	0	0	1	2	6	1	2
chr17_28057353_G_A	chr17	28057353	rs13482935	G	A	191.77	N/A	921.77	N/A	PASS	N/A	PASS	N/A	60	N/A	60	N/A	SYNONYMOUS_CODING	LOW	SILENT	cgG/cgA	R1002	Anks1	protein_coding	ENSMUST00000088027	exon_17_28057327_28057464	G/A	0.304348	N/A	0.736842	N/A	7	N/A	28	N/A	23	16	38	41	diff	F3847	0.736842	0.785714	0.868852	0.8	38	28	61	40
chr17_45639667_T_C	chr17	45639667	rs108267978	T	C	516.77	N/A	1695.77	N/A	PASS	N/A	PASS	N/A	60	N/A	60	N/A	SYNONYMOUS_CODING	LOW	SILENT	caA/caG	Q295	Capn11	protein_coding	ENSMUST00000120717	exon_17_45639623_45639708	T/C	0.390244	N/A	0.701493	N/A	16	N/A	47	N/A	41	31	67	79	diff	F3847	0.888889	1	0.75	0	9	2	4	0
chr17_35014678_C_T	chr17	35014678	rs13472121	C	T	314.77	N/A	1159.77	N/A	PASS	N/A	PASS	N/A	60	N/A	60	N/A	SYNONYMOUS_CODING	LOW	SILENT	gcC/gcT	A993	Vars	protein_coding	ENSMUST00000087315	exon_17_35014622_35014777	C/T	0.37037	N/A	0.809524	N/A	10	N/A	34	N/A	27	22	42	48	diff	F3847	0.441718	0.51	0.631068	0.671053	163	100	103	76
chr1_191306997_T_G	chr1	191306997	rs33839907	T	G	440.77	N/A	779.77	N/A	PASS	N/A	PASS	N/A	60	N/A	60	N/A	SYNONYMOUS_CODING	LOW	SILENT	cgA/cgC	R144	Nenf	protein_coding	ENSMUST00000046770	exon_1_191306789_191307089	T/G	0.378378	N/A	1	N/A	14	N/A	19	N/A	37	30	19	32	diff	F3847	0.317365	0.233333	0.875	0.755814	167	120	32	86
chr15_79312986_G_A	chr15	79312986	rs31602325	G	A	N/A	N/A	233.8	N/A	N/A	N/A	PASS	N/A	N/A	N/A	60	N/A	SYNONYMOUS_CODING	LOW	SILENT	ctC/ctT	L129	Pla2g6	protein_coding	ENSMUST00000047816	exon_15_79312948_79313163	G/A	0	N/A	0.875	N/A	0	N/A	7	N/A	7	4	8	5	diff	F3847	0.833333	0.708333	0.555556	0.777778	18	24	18	9
chr1_191328257_A_T	chr1	191328257	rs13472176	A	T	675.77	N/A	926.77	N/A	PASS	N/A	PASS	N/A	60	N/A	60	N/A	SYNONYMOUS_CODING	LOW	SILENT	gtA/gtT	V37	Tmem206	protein_coding	ENSMUST00000027940	exon_1_191328183_191328279	A/T	0.403846	N/A	1	N/A	21	N/A	24	N/A	52	48	24	38	diff	F3847	0.607143	0.428571	0.944444	0.928571	28	21	18	14
chr13_17989590_T_A	chr13	17989590	rs51363477	T	A	477.77	N/A	597.77	N/A	PASS	N/A	PASS	N/A	57.48	N/A	54.7	N/A	SYNONYMOUS_CODING	LOW	SILENT	tcA/tcT	S147	Yae1d1	protein_coding	ENSMUST00000099735	exon_13_17986640_17989782	T/A	0.126531	N/A	0.513514	N/A	31	N/A	19	N/A	245	64	37	81	diff	F3847	0	0.439252	0.638889	0.446602	670	107	108	103
chr1_179043850_G_A	chr1	179043850	rs38793308	G	A	340.77	N/A	259.8	N/A	PASS	N/A	PASS	N/A	60	N/A	60	N/A	SYNONYMOUS_CODING	LOW	SILENT	ccC/ccT	P321	Smyd3	protein_coding	ENSMUST00000128302	exon_1_179043737_179043911	G/A	0.423077	N/A	1	N/A	11	N/A	7	N/A	26	22	7	19	diff	F3847	0.464286	0.4	0.833333	0.5	28	20	12	4
chr17_32151353_G_A	chr17	32151353	.	G	A	392.77	N/A	1434.77	N/A	PASS	N/A	PASS	N/A	60	N/A	60	N/A	SYNONYMOUS_CODING	LOW	SILENT	tgC/tgT	C744	Notch3	protein_coding	ENSMUST00000087723	exon_17_32151286_32151437	G/A	0.351351	N/A	0.677419	N/A	13	N/A	42	N/A	37	31	62	38	diff	F3847	0	0	0	1	0	11	6	3
chr11_43420701_C_T	chr11	43420701	rs3023333	C	T	N/A	151.77	511.77	232.77	N/A	PASS	PASS	PASS	N/A	60	59.6	59.68	DOWNSTREAM	MODIFIER	NONE	N/A	N/A	Pttg1	protein_coding	ENSMUST00000020685	N/A	C/T	0	0.333333	0.5	0.388889	0	6	11	7	19	18	22	18	sim	F3844 F3847 F3852	1	0	1	0	2	73	3	54
chr13_17882136_C_T	chr13	17882136	rs51821417	C	T	661.77	714.77	1541.77	1189.77	PASS	PASS	PASS	PASS	60	60.17	60.19	60	UTR_3_PRIME	MODIFIER	NONE	N/A	N/A	Rala	protein_coding	ENSMUST00000009003	N/A	C/T	0.140969	0.34375	0.719298	0.352381	32	22	41	37	227	64	57	105	sim	F3844 F3847 F3852	0	0.357143	0.64	0.345455	197	14	50	55
chrX_6053825_G_A	chrX	6053825	.	G	A	N/A	N/A	1857.77	1365.77	N/A	N/A	PASS	PASS	N/A	N/A	60	60	UTR_3_PRIME	MODIFIER	NONE	N/A	N/A	Nudt11	protein_coding	ENSMUST00000103007	N/A	G/A	0	N/A	1	0.72549	0	N/A	45	37	42	32	45	51	sim	F3847 F3852	0	0	1	1	16	2	10	11
chr1_180424233_G_T	chr1	180424233	rs216250745	G	T	744.77	N/A	846.77	1268.77	PASS	N/A	PASS	PASS	60	N/A	60	60	UTR_3_PRIME	MODIFIER	NONE	N/A	N/A	Itpkb	protein_coding	ENSMUST00000070181	N/A	G/T	0.5	N/A	1	0.810811	20	N/A	19	30	40	35	19	37	sim	F3847 F3852	0.515152	0.516129	0.857143	0	33	62	7	13
chr1_182131875_G_C	chr1	182131875	rs50543168	G	C	3750.77	N/A	2881.77	3154.77	PASS	N/A	PASS	PASS	59.96	N/A	60	60	UTR_3_PRIME	MODIFIER	NONE	N/A	N/A	Srp9	protein_coding	ENSMUST00000027792	N/A	G/C	0.465217	N/A	0.986486	0.767857	107	N/A	73	86	230	149	74	112	sim	F3847 F3852	0.516667	0.333333	0.923077	0.959184	60	48	26	49
chr1_180801706_T_A	chr1	180801706	rs32435419	T	A	1348.77	N/A	1057.77	1611.77	PASS	N/A	PASS	PASS	60	N/A	60	60	DOWNSTREAM	MODIFIER	NONE	N/A	N/A	H3f3a	protein_coding	ENSMUST00000081026	N/A	T/A	0.494253	N/A	0.966667	0.854545	43	N/A	29	47	87	45	30	55	sim	F3847 F3852	0	0	1	0	3	2	2	0
chr1_180435881_T_C	chr1	180435881	rs253634165	T	C	498.77	N/A	597.96	715.77	PASS	N/A	PASS	PASS	60	N/A	60	60	DOWNSTREAM	MODIFIER	NONE	N/A	N/A	6330403A02Rik	protein_coding	ENSMUST00000179826	N/A	T/C	0.384615	N/A	0.941176	0.76	15	N/A	16	19	39	31	17	25	sim	F3847 F3852	0	1	0	0	0	2	0	0
chrX_42149400_G_A	chrX	42149400	.	G	A	N/A	1020.77	N/A	1113.77	N/A	PASS	N/A	PASS	N/A	53.97	N/A	54.89	UPSTREAM	MODIFIER	NONE	N/A	N/A	Stag2	protein_coding	ENSMUST00000069619	N/A	G/A	0	0.605263	N/A	0.423077	0	23	N/A	22	49	38	54	52	sim	F3844 F3852	1	1	0	0	3	2	3	5
chr1_178322681_C_T	chr1	178322681	rs13470654	C	T	1987.77	N/A	1522.77	1946.77	PASS	N/A	PASS	PASS	60	N/A	60	60	DOWNSTREAM	MODIFIER	NONE	N/A	N/A	Cox20	protein_coding	ENSMUST00000154437	N/A	C/T	0.491071	N/A	1	0.772727	55	N/A	37	51	112	63	37	66	sim	F3847 F3852	0.418033	0.514706	0.857143	0.789474	122	68	7	19
chrX_42149405_G_A	chrX	42149405	.	G	A	N/A	1020.77	N/A	1027.73	N/A	PASS	N/A	PASS	N/A	54.83	N/A	55.6	UPSTREAM	MODIFIER	NONE	N/A	N/A	Stag2	protein_coding	ENSMUST00000069619	N/A	G/A	0	0.454545	N/A	0.333333	0	20	N/A	20	50	44	58	60	sim	F3844 F3852	1	0.666667	0	0	3	3	3	5
chr1_179626841_T_A	chr1	179626841	rs31813731	T	A	5772.77	N/A	4052.77	4877.77	PASS	N/A	PASS	PASS	60	N/A	60	60	UTR_3_PRIME	MODIFIER	NONE	N/A	N/A	Cnst	protein_coding	ENSMUST00000040706	N/A	T/A	0.522796	N/A	0.964912	0.797753	172	N/A	110	142	329	192	114	178	sim	F3847 F3852	0.527778	0.3125	1	1	36	16	5	14
chr1_180424242_G_A	chr1	180424242	rs227771863	G	A	744.77	N/A	846.77	1268.77	PASS	N/A	PASS	PASS	60	N/A	60	60	UTR_3_PRIME	MODIFIER	NONE	N/A	N/A	Itpkb	protein_coding	ENSMUST00000070181	N/A	G/A	0.486486	N/A	1	0.789474	18	N/A	18	30	37	34	18	38	sim	F3847 F3852	0.53125	0.590909	0.857143	0	32	66	7	13
chr15_76711087_T_C	chr15	76711087	rs31757536	T	C	403.77	N/A	670.77	823.77	PASS	N/A	PASS	PASS	60	N/A	60	60	DOWNSTREAM	MODIFIER	NONE	N/A	N/A	Lrrc24	protein_coding	ENSMUST00000049956	N/A	T/C	0.318182	N/A	0.666667	0.609756	14	N/A	20	25	44	31	30	41	sim	F3847 F3852	0.222222	0.4	0.5	0.333333	9	5	4	6
chr4_88719123_G_A	chr4	88719123	rs234486136;rs249880267;rs243808597;rs215615035	G	A	N/A	N/A	240.73	507.73	N/A	N/A	PASS	PASS	N/A	N/A	60	60	UPSTREAM	MODIFIER	NONE	N/A	N/A		protein_coding	ENSMUST00000181601	N/A	G/A	0	N/A	0.27	0.371134	0	N/A	27	36	96	120	100	97	sim	F3847 F3852	0	0	0.3125	0.448276	28	29	32	29
chr1_191575851_C_T	chr1	191575851	rs33841113	C	T	165.77	N/A	361.77	238.8	PASS	N/A	PASS	PASS	60	N/A	60	60	UPSTREAM	MODIFIER	NONE	N/A	N/A	Dtl	protein_coding	ENSMUST00000027933	N/A	C/T	0.352941	N/A	1	1	6	N/A	10	7	17	11	10	7	sim	F3847 F3852	0.484848	0.567568	1	0.857143	66	37	23	14
chr17_24700556_G_A	chr17	24700556	rs108268294	G	A	268.77	N/A	1014.77	987.77	PASS	N/A	PASS	PASS	60	N/A	60	60	DOWNSTREAM	MODIFIER	NONE	N/A	N/A	Noxo1	protein_coding	ENSMUST00000019464	N/A	G/A	0.333333	N/A	0.682927	0.666667	10	N/A	28	30	30	22	41	45	sim	F3847 F3852	0	0	0.5	0.857143	6	1	6	7
chr9_61955288_C_G	chr9	61955288	.	C	G	1238.77	N/A	904.77	2056.77	PASS	N/A	PASS	PASS	60	N/A	60	60	DOWNSTREAM	MODIFIER	NONE	N/A	N/A	Paqr5	processed_transcript	ENSMUST00000113990	N/A	C/G	0.492958	N/A	0.961538	0.888889	35	N/A	25	56	71	29	26	63	sim	F3847 F3852	0	0	1	0	1	0	2	1
chr1_182895306_G_C	chr1	182895306	.	G	C	768.77	N/A	1118.82	847.77	PASS	N/A	PASS	PASS	60	N/A	60	60	DOWNSTREAM	MODIFIER	NONE	N/A	N/A	Susd4	processed_transcript	ENSMUST00000153348	N/A	G/C	0.45283	N/A	0.939394	0.827586	24	N/A	31	24	53	33	33	29	sim	F3847 F3852	0	0.5	1	1	1	4	12	4
chr1_179744980_A_T	chr1	179744980	rs32649512	A	T	8263.77	N/A	10048.8	11613.8	PASS	N/A	PASS	PASS	60	N/A	60	60	DOWNSTREAM	MODIFIER	NONE	N/A	N/A	Ahctf1	protein_coding	ENSMUST00000151734	N/A	A/T	0.482328	N/A	0.959559	0.766265	232	N/A	261	318	481	437	272	415	sim	F3847 F3852	0.333333	0.6	0	0.666667	6	5	1	3
chr1_178198281_A_G	chr1	178198281	rs228979238	A	G	3682.77	N/A	2884.77	3848.77	PASS	N/A	PASS	PASS	60	N/A	60	60	INTRON	MODIFIER	NONE	N/A	N/A	Desi2	protein_coding	ENSMUST00000027783	N/A	A/G	0.463415	N/A	0.986842	0.76087	114	N/A	75	105	246	126	76	138	sim	F3847 F3852	0.666667	0	0	0	3	13	20	10
chr1_191082535_G_A	chr1	191082535	rs31922497	G	A	543.77	N/A	1011.77	1038.77	PASS	N/A	PASS	PASS	60	N/A	60	60	UTR_3_PRIME	MODIFIER	NONE	N/A	N/A	Nsl1	protein_coding	ENSMUST00000078259	N/A	G/A	0.485714	N/A	1	0.833333	17	N/A	25	30	35	36	25	36	sim	F3847 F3852	0.552632	0.5625	1	1	38	16	7	13
chr4_59023876_C_T	chr4	59023876	.	C	T	N/A	N/A	N/A	140.77	N/A	N/A	N/A	PASS	N/A	N/A	N/A	60	DOWNSTREAM	MODIFIER	NONE	N/A	N/A	Dnajc25	protein_coding	ENSMUST00000148366	N/A	C/T	0	N/A	N/A	0.28125	0	N/A	N/A	9	45	34	32	32	diff	F3852	0	0	0.4	1	448	375	5	3
chr2_27016845_G_T	chr2	27016845	rs244549613	G	T	530.77	N/A	846.77	N/A	PASS	N/A	PASS	N/A	60	N/A	60	N/A	DOWNSTREAM	MODIFIER	NONE	N/A	N/A	Slc2a6	protein_coding	ENSMUST00000045702	N/A	G/T	0.36	N/A	0.657143	N/A	18	N/A	23	N/A	50	28	35	57	diff	F3847	0.692308	0.75	0.75	0.857143	13	4	4	7
chr1_180423357_A_G	chr1	180423357	rs245068236	A	G	1358.77	N/A	1378.77	N/A	PASS	N/A	PASS	N/A	60	N/A	60	N/A	UTR_3_PRIME	MODIFIER	NONE	N/A	N/A	Itpkb	protein_coding	ENSMUST00000070181	N/A	A/G	0.506494	N/A	0.972222	N/A	39	N/A	35	N/A	77	45	36	34	diff	F3847	0.375	0.857143	0	0	8	7	1	0
chr1_181168618_C_T	chr1	181168618	rs32758619	C	T	401.77	N/A	393.77	N/A	PASS	N/A	PASS	N/A	60	N/A	60	N/A	DOWNSTREAM	MODIFIER	NONE	N/A	N/A	Cnih4	protein_coding	ENSMUST00000075968	N/A	C/T	0.5	N/A	1	N/A	12	N/A	11	N/A	24	17	11	14	diff	F3847	0.636364	0.5625	1	1	22	16	17	14
chr7_132984190_G_A	chr7	132984190	.	G	A	N/A	598.73	N/A	N/A	N/A	PASS	N/A	N/A	N/A	59.31	N/A	N/A	DOWNSTREAM	MODIFIER	NONE	N/A	N/A	Ctbp2	nonsense_mediated_decay	ENSMUST00000033269	N/A	G/A	0	0.349206	N/A	N/A	0	22	N/A	N/A	123	63	84	106	diff	F3844	0	0	0.428571	0	24	15	7	18
chr8_36569023_G_A	chr8	36569023	rs247638270	G	A	N/A	N/A	N/A	254.77	N/A	N/A	N/A	PASS	N/A	N/A	N/A	58.01	DOWNSTREAM	MODIFIER	NONE	N/A	N/A	Dlc1	protein_coding	ENSMUST00000156312	N/A	G/A	0	N/A	N/A	0.705882	0	N/A	N/A	12	13	4	6	17	diff	F3852	0	0.8	0	0.8	3	5	3	10
chr17_35238119_T_C	chr17	35238119	rs107894721;rs33121269	T	C	782.77	N/A	1737.77	N/A	PASS	N/A	PASS	N/A	60	N/A	60	N/A	DOWNSTREAM	MODIFIER	NONE	N/A	N/A	Atp6v1g2	retained_intron	ENSMUST00000118384	N/A	T/C	0.451613	N/A	0.684932	N/A	28	N/A	50	N/A	62	44	73	91	diff	F3847	0.666667	0.285714	0.823529	0.5625	3	7	17	16
chr1_179745390_T_C	chr1	179745390	rs32650548	T	C	1295.77	N/A	911.77	N/A	PASS	N/A	PASS	N/A	60	N/A	60	N/A	DOWNSTREAM	MODIFIER	NONE	N/A	N/A	Ahctf1	protein_coding	ENSMUST00000151734	N/A	T/C	0.616667	N/A	0.96	N/A	37	N/A	24	N/A	60	37	25	47	diff	F3847	0.529412	0.375	0.9375	0.823529	34	24	16	17
chr1_181168361_G_A	chr1	181168361	rs32757820	G	A	980.77	N/A	514.77	N/A	PASS	N/A	PASS	N/A	60	N/A	60	N/A	DOWNSTREAM	MODIFIER	NONE	N/A	N/A	Cnih4	protein_coding	ENSMUST00000075968	N/A	G/A	0.509091	N/A	1	N/A	28	N/A	13	N/A	55	39	13	29	diff	F3847	0.666667	0.529412	1	0.826087	33	34	17	23
chr17_31114516_T_C	chr17	31114516	.	T	C	N/A	N/A	N/A	150.77	N/A	N/A	N/A	PASS	N/A	N/A	N/A	60	UTR_3_PRIME	MODIFIER	NONE	N/A	N/A	Abcg1	protein_coding	ENSMUST00000024829	N/A	T/C	0	N/A	N/A	0.271429	0	N/A	N/A	19	62	39	81	70	diff	F3852	0.6	0	0	0	5	3	5	6
chr1_106770392_T_C	chr1	106770392	rs50318829	T	C	141.77	417.77	N/A	N/A	PASS	PASS	N/A	N/A	60	60	N/A	N/A	INTRON	MODIFIER	NONE	N/A	N/A	Vps4b	protein_coding	ENSMUST00000112736	N/A	T/C	0.24	0.684211	N/A	N/A	6	13	N/A	N/A	25	19	28	29	diff	F3844	0.571429	0.222222	0.571429	0.25	7	9	14	8
chr7_104862191_C_T	chr7	104862191	.	C	T	N/A	112.77	N/A	N/A	N/A	PASS	N/A	N/A	N/A	41.88	N/A	N/A	UTR_3_PRIME	MODIFIER	NONE	N/A	N/A	Usp17la	protein_coding	ENSMUST00000067695	N/A	C/T	0	0.416667	N/A	N/A	0	5	N/A	N/A	15	12	19	15	diff	F3844	0	0.5	0	0.4	78	6	53	5
chr17_23736413_C_T	chr17	23736413	rs249387112	C	T	646.77	N/A	1330.77	N/A	PASS	N/A	PASS	N/A	60	N/A	60	N/A	DOWNSTREAM	MODIFIER	NONE	N/A	N/A	Kremen2	protein_coding	ENSMUST00000046525	N/A	C/T	0.392157	N/A	0.65	N/A	20	N/A	39	N/A	51	37	60	76	diff	F3847	0	0	0.288136	0	76	60	59	177
chr17_45449136_G_A	chr17	45449136	rs257825510	G	A	918.77	N/A	1959.77	N/A	PASS	N/A	PASS	N/A	60	N/A	60	N/A	UTR_3_PRIME	MODIFIER	NONE	N/A	N/A	Spats1	protein_coding	ENSMUST00000024731	N/A	G/A	0.405405	N/A	0.695122	N/A	30	N/A	57	N/A	74	62	82	81	diff	F3847	0.666667	1	0.727273	1	6	3	11	2
chr17_35026054_C_T	chr17	35026054	rs108112954	C	T	2348.77	N/A	5028.77	N/A	PASS	N/A	PASS	N/A	60	N/A	60	N/A	DOWNSTREAM	MODIFIER	NONE	N/A	N/A	Msh5	processed_transcript	ENSMUST00000007250	N/A	C/T	0.393617	N/A	0.658986	N/A	74	N/A	143	N/A	188	163	217	271	diff	F3847	1	1	0	0.75	3	3	1	4
chr7_142081488_G_T	chr7	142081488	rs229662604	G	T	N/A	67.77	N/A	N/A	N/A	PASS	N/A	N/A	N/A	60	N/A	N/A	DOWNSTREAM	MODIFIER	NONE	N/A	N/A	Dusp8	protein_coding	ENSMUST00000143661	N/A	G/T	0	0.230769	N/A	N/A	0	6	N/A	N/A	47	26	31	46	diff	F3844	0.285714	0	0.416667	0	14	2	12	13
chr1_181168190_G_A	chr1	181168190	rs32757814	G	A	986.77	N/A	876.53	N/A	PASS	N/A	PASS	N/A	60	N/A	60	N/A	DOWNSTREAM	MODIFIER	NONE	N/A	N/A	Cnih4	protein_coding	ENSMUST00000075968	N/A	G/A	0.47541	N/A	0.92	N/A	29	N/A	23	N/A	61	51	25	46	diff	F3847	0.645161	0.542857	1	0.878788	31	35	15	33
chr1_191306816_C_T	chr1	191306816	rs33839909	C	T	407.77	N/A	545.77	N/A	PASS	N/A	PASS	N/A	60	N/A	60	N/A	UTR_3_PRIME	MODIFIER	NONE	N/A	N/A	Nenf	protein_coding	ENSMUST00000046770	N/A	C/T	0.433333	N/A	1	N/A	13	N/A	15	N/A	30	24	15	26	diff	F3847	0.304348	0	0.875	0.6875	23	15	8	16
chr1_23369743_A_T	chr1	23369743	.	A	T	N/A	N/A	195.77	N/A	N/A	N/A	PASS	N/A	N/A	N/A	60	N/A	UTR_3_PRIME	MODIFIER	NONE	N/A	N/A	Ogfrl1	protein_coding	ENSMUST00000027343	N/A	A/T	0	N/A	0.25641	N/A	0	N/A	10	N/A	45	24	39	47	diff	F3847	0	0	0	0.333333	8	2	1	9
chr1_181093803_A_G	chr1	181093803	rs32751221	A	G	482.77	N/A	290.78	N/A	PASS	N/A	PASS	N/A	60	N/A	60	N/A	UTR_3_PRIME	MODIFIER	NONE	N/A	N/A	Nvl	protein_coding	ENSMUST00000027797	N/A	A/G	0.472222	N/A	1	N/A	17	N/A	8	N/A	36	23	8	25	diff	F3847	0.5	0.290323	1	1	40	31	16	14
chr7_132984200_G_A	chr7	132984200	.	G	A	N/A	N/A	607.77	N/A	N/A	N/A	PASS	N/A	N/A	N/A	58.82	N/A	DOWNSTREAM	MODIFIER	NONE	N/A	N/A	Ctbp2	nonsense_mediated_decay	ENSMUST00000033269	N/A	G/A	0	N/A	0.20202	N/A	0	N/A	20	N/A	146	83	99	135	diff	F3847	0	0	0.272727	0.666667	32	20	11	9
chr16_14474968_T_C	chr16	14474968	rs4164280	T	C	N/A	N/A	N/A	900.77	N/A	N/A	N/A	PASS	N/A	N/A	N/A	60	DOWNSTREAM	MODIFIER	NONE	N/A	N/A	Abcc1	nonsense_mediated_decay	ENSMUST00000130671	N/A	T/C	0	N/A	N/A	0.20625	0	N/A	N/A	33	233	148	205	160	diff	F3852	0	0	0	1	2	0	1	2
chr12_112181324_C_A	chr12	112181324	rs228892783	C	A	N/A	158.77	N/A	N/A	N/A	PASS	N/A	N/A	N/A	60	N/A	N/A	UTR_3_PRIME	MODIFIER	NONE	N/A	N/A	Kif26a	protein_coding	ENSMUST00000128402	N/A	C/A	0	0.357143	N/A	N/A	0	15	N/A	N/A	64	42	60	63	diff	F3844	0	0	0	0.375	0	3	1	8
chr17_5343793_G_A	chr17	5343793	rs51912657	G	A	1654.77	N/A	3274.77	N/A	PASS	N/A	PASS	N/A	60	N/A	60	N/A	DOWNSTREAM	MODIFIER	NONE	N/A	N/A	Arid1b	processed_transcript	ENSMUST00000092723	N/A	G/A	0.477876	N/A	0.682119	N/A	54	N/A	103	N/A	113	83	151	141	diff	F3847	0.617647	0.633333	0.731707	0.8	34	30	41	30
chr18_69684362_G_A	chr18	69684362	.	G	A	N/A	N/A	186.77	N/A	N/A	N/A	PASS	N/A	N/A	N/A	58.99	N/A	DOWNSTREAM	MODIFIER	NONE	N/A	N/A	Tcf4	protein_coding	ENSMUST00000066717	N/A	G/A	0	N/A	0.27907	N/A	0	N/A	12	N/A	45	34	43	52	diff	F3847	0.366071	0	0.466667	0.366071	112	47	75	112
chr17_34593546_C_A	chr17	34593546	.	C	A	649.77	N/A	1263.77	N/A	PASS	N/A	PASS	N/A	60	N/A	60	N/A	DOWNSTREAM	MODIFIER	NONE	N/A	N/A	Gpsm3	protein_coding	ENSMUST00000038244	N/A	C/A	0.428571	N/A	0.692308	N/A	21	N/A	36	N/A	49	22	52	65	diff	F3847	0	0	0.75	0	67	29	4	46
chr5_23963665_C_T	chr5	23963665	rs32048901	C	T	534.77	N/A	1071.77	N/A	PASS	N/A	PASS	N/A	60	N/A	60	N/A	DOWNSTREAM	MODIFIER	NONE	N/A	N/A	Fam126a	processed_transcript	ENSMUST00000115109	N/A	C/T	0.339286	N/A	0.673913	N/A	19	N/A	31	N/A	56	30	46	40	diff	F3847	0.576923	0.461538	0.433333	0	26	13	30	27
chr1_178321887_C_G	chr1	178321887	rs264659755	C	G	1261.77	N/A	1677.77	N/A	PASS	N/A	PASS	N/A	60	N/A	60	N/A	DOWNSTREAM	MODIFIER	NONE	N/A	N/A	Hnrnpu	nonsense_mediated_decay	ENSMUST00000161769	N/A	C/G	0.5625	N/A	0.97619	N/A	36	N/A	41	N/A	64	42	42	50	diff	F3847	0	0.240506	0.236842	0.572917	394	158	38	96
chr1_181167969_A_G	chr1	181167969	rs32756022	A	G	814.77	N/A	622.77	N/A	PASS	N/A	PASS	N/A	60	N/A	60	N/A	DOWNSTREAM	MODIFIER	NONE	N/A	N/A	Cnih4	protein_coding	ENSMUST00000075968	N/A	A/G	0.560976	N/A	1	N/A	23	N/A	16	N/A	41	36	16	40	diff	F3847	0.612903	0.625	1	1	31	16	34	16
chr4_21875275_A_T	chr4	21875275	.	A	T	N/A	N/A	N/A	2899.77	N/A	N/A	N/A	PASS	N/A	N/A	N/A	60	DOWNSTREAM	MODIFIER	NONE	N/A	N/A	Sfrs18	protein_coding	ENSMUST00000108229	N/A	A/T	0	N/A	N/A	0.287926	0	N/A	N/A	93	387	258	265	323	diff	F3852	0	0	0	0.274194	53	31	42	62
chr16_56017065_G_A	chr16	56017065	.	G	A	N/A	N/A	N/A	181.77	N/A	N/A	N/A	PASS	N/A	N/A	N/A	39.3	DOWNSTREAM	MODIFIER	NONE	N/A	N/A	Pcnp	protein_coding	ENSMUST00000096021	N/A	G/A	0	N/A	N/A	0.416667	0	N/A	N/A	20	121	58	99	48	diff	F3852	0.357143	0.333333	0.344262	0.333333	56	48	61	48
chr17_51812402_A_G	chr17	51812402	rs108664905	A	G	1261.77	N/A	2398.77	N/A	PASS	N/A	PASS	N/A	60	N/A	60	N/A	INTRON	MODIFIER	NONE	N/A	N/A	Satb1	protein_coding	ENSMUST00000024720	N/A	A/G	0.5	N/A	0.704082	N/A	38	N/A	69	N/A	76	63	98	107	diff	F3847	0.5	0.714286	0.541667	0.714286	12	7	24	14
chr11_102162670_G_A	chr11	102162670	.	G	A	N/A	N/A	303.77	N/A	N/A	N/A	PASS	N/A	N/A	N/A	60	N/A	DOWNSTREAM	MODIFIER	NONE	N/A	N/A	Lsm12	protein_coding	ENSMUST00000137930	N/A	G/A	0	N/A	0.52381	N/A	0	N/A	11	N/A	27	22	21	31	diff	F3847	0.666667	0.615385	0.428571	0.5	15	13	14	10
chr17_51738419_C_T	chr17	51738419	rs47976538	C	T	926.77	N/A	1666.77	N/A	PASS	N/A	PASS	N/A	60	N/A	60	N/A	DOWNSTREAM	MODIFIER	NONE	N/A	N/A	Satb1	protein_coding	ENSMUST00000024720	N/A	C/T	0.464286	N/A	0.741935	N/A	26	N/A	46	N/A	56	41	62	73	diff	F3847	0.454545	0	0.6	0.652174	11	2	35	23
chr13_17897074_T_C	chr13	17897074	rs13474467	T	C	448.77	N/A	615.77	N/A	PASS	N/A	PASS	N/A	60	N/A	60	N/A	UTR_5_PRIME	MODIFIER	NONE	N/A	N/A	Rala	protein_coding	ENSMUST00000009003	exon_13_17896953_17897102	T/C	0.171171	N/A	0.692308	N/A	19	N/A	18	N/A	111	22	26	35	diff	F3847	0	0.322581	0.559524	0.430556	565	62	84	72
chr4_4763464_C_T	chr4	4763464	rs223635955;rs250028419	C	T	N/A	N/A	157.77	N/A	N/A	N/A	PASS	N/A	N/A	N/A	60	N/A	UTR_3_PRIME	MODIFIER	NONE	N/A	N/A	Impad1	protein_coding	ENSMUST00000084949	N/A	C/T	0	N/A	0.333333	N/A	0	N/A	16	N/A	63	38	48	55	diff	F3847	0.227273	0	0.214286	0.277778	22	18	28	18
chr17_49993343_G_T	chr17	49993343	rs29613068	G	T	755.77	N/A	1886.77	N/A	PASS	N/A	PASS	N/A	60	N/A	60	N/A	UTR_3_PRIME	MODIFIER	NONE	N/A	N/A	Rftn1	protein_coding	ENSMUST00000044503	N/A	G/T	0.372881	N/A	0.627907	N/A	22	N/A	54	N/A	59	46	86	80	diff	F3847	0.492063	0.542857	0.722222	0.5	63	70	18	40
chr17_44083610_G_A	chr17	44083610	rs47085385	G	A	782.77	N/A	1696.77	N/A	PASS	N/A	PASS	N/A	60	N/A	60	N/A	INTRON	MODIFIER	NONE	N/A	N/A	Enpp5	protein_coding	ENSMUST00000024756	N/A	G/A	0.45098	N/A	0.701493	N/A	23	N/A	47	N/A	51	35	67	90	diff	F3847	0	0.666667	0.666667	0	7	3	3	15
chr15_99038010_C_T	chr15	99038010	rs50392322	C	T	447.77	N/A	871.77	N/A	PASS	N/A	PASS	N/A	56.22	N/A	51.07	N/A	UTR_3_PRIME	MODIFIER	NONE	N/A	N/A	Tuba1c	protein_coding	ENSMUST00000058914	N/A	C/T	0.261538	N/A	0.553191	N/A	17	N/A	26	N/A	65	40	47	67	diff	F3847	0.333333	0.292683	0.465116	0.491228	147	41	43	57
chr11_52246538_C_T	chr11	52246538	rs218084921;rs243515672	C	T	N/A	197.73	N/A	N/A	N/A	PASS	N/A	N/A	N/A	60	N/A	N/A	DOWNSTREAM	MODIFIER	NONE	N/A	N/A	Skp1a	nonsense_mediated_decay	ENSMUST00000116595	N/A	C/T	0	0.397059	N/A	N/A	0	27	N/A	N/A	125	68	94	143	diff	F3844	0.392857	0.396396	0.3875	0.443983	420	222	240	241
chr4_138206484_G_A	chr4	138206484	.	G	A	N/A	N/A	N/A	157.77	N/A	N/A	N/A	PASS	N/A	N/A	N/A	59.62	DOWNSTREAM	MODIFIER	NONE	N/A	N/A	Eif4g3	protein_coding	ENSMUST00000148074	N/A	G/A	0	N/A	N/A	0.223529	0	N/A	N/A	19	161	123	104	85	diff	F3852	0.470588	0	0	0	17	16	2	10
chr1_191306837_C_T	chr1	191306837	rs33839908	C	T	434.77	N/A	569.77	N/A	PASS	N/A	PASS	N/A	60	N/A	60	N/A	UTR_3_PRIME	MODIFIER	NONE	N/A	N/A	Nenf	protein_coding	ENSMUST00000046770	N/A	C/T	0.368421	N/A	1	N/A	14	N/A	16	N/A	38	30	16	26	diff	F3847	0.242424	0	0.888889	0.65	33	29	9	20
chr10_81530600_G_T	chr10	81530600	.	G	T	N/A	92.77	N/A	N/A	N/A	PASS	N/A	N/A	N/A	60.33	N/A	N/A	DOWNSTREAM	MODIFIER	NONE	N/A	N/A	Gna11	protein_coding	ENSMUST00000134354	N/A	G/T	0	0.212121	N/A	N/A	0	7	N/A	N/A	53	33	48	68	diff	F3844	0.717391	0	0.75	0.567568	46	21	16	37
chr1_179626288_T_C	chr1	179626288	rs31982496	T	C	1077.77	N/A	944.77	N/A	PASS	N/A	PASS	N/A	60	N/A	60	N/A	UTR_3_PRIME	MODIFIER	NONE	N/A	N/A	Cnst	protein_coding	ENSMUST00000040706	N/A	T/C	0.52459	N/A	1	N/A	32	N/A	23	N/A	61	39	23	37	diff	F3847	0.52381	0.307692	1	1	42	13	7	18
chr17_44604806_G_A	chr17	44604806	rs229083993	G	A	738.77	N/A	1771.77	N/A	PASS	N/A	PASS	N/A	60	N/A	60	N/A	DOWNSTREAM	MODIFIER	NONE	N/A	N/A	Runx2	nonsense_mediated_decay	ENSMUST00000113568	N/A	G/A	0.44898	N/A	0.695652	N/A	22	N/A	48	N/A	49	24	69	53	diff	F3847	0	0.666667	0	0	0	3	4	7
chr17_40923458_G_A	chr17	40923458	.	G	A	1072.77	N/A	2141.77	N/A	PASS	N/A	PASS	N/A	60	N/A	60	N/A	DOWNSTREAM	MODIFIER	NONE	N/A	N/A	Cenpq	protein_coding	ENSMUST00000130890	N/A	G/A	0.426667	N/A	0.659091	N/A	32	N/A	58	N/A	75	39	88	64	diff	F3847	0.492308	0.384615	0.6	0.71875	65	26	55	32
chr17_27580441_A_G	chr17	27580441	rs225784395;rs229209019;rs29520140	A	G	N/A	N/A	64.73	N/A	N/A	N/A	PASS	N/A	N/A	N/A	60	N/A	DOWNSTREAM	MODIFIER	NONE	N/A	N/A	Nudt3	protein_coding	ENSMUST00000062397	N/A	A/G	0	N/A	0.648649	N/A	0	N/A	24	N/A	27	19	37	34	diff	F3847	0.29703	0	0.344444	0.369863	101	34	90	73
chr17_35238037_A_T	chr17	35238037	rs108071304;rs254920651;rs33056240	A	T	855.77	N/A	1789.77	N/A	PASS	N/A	PASS	N/A	60	N/A	60	N/A	DOWNSTREAM	MODIFIER	NONE	N/A	N/A	Atp6v1g2	retained_intron	ENSMUST00000118384	N/A	A/T	0.41791	N/A	0.722222	N/A	28	N/A	52	N/A	67	44	72	95	diff	F3847	0.666667	0.875	0.75	0.6	6	8	12	10
chr1_180422305_A_G	chr1	180422305	rs32749025	A	G	1276.77	N/A	1405.77	N/A	PASS	N/A	PASS	N/A	60	N/A	60	N/A	UTR_3_PRIME	MODIFIER	NONE	N/A	N/A	Itpkb	protein_coding	ENSMUST00000070181	N/A	A/G	0.513158	N/A	0.948718	N/A	39	N/A	37	N/A	76	41	39	42	diff	F3847	0.428571	0.46	1	0	21	50	10	4
chr1_153744770_C_T	chr1	153744770	rs31285118	C	T	1503.77	N/A	1829.77	N/A	PASS	N/A	PASS	N/A	60.08	N/A	60	N/A	UPSTREAM	MODIFIER	NONE	N/A	N/A	Rnasel	protein_coding	ENSMUST00000086209	N/A	C/T	0.358779	N/A	0.586957	N/A	47	N/A	54	N/A	131	80	92	122	diff	F3847	0	0	0.333333	0	1	34	12	14
chr16_94694214_G_T	chr16	94694214	.	G	T	N/A	262.77	N/A	N/A	N/A	PASS	N/A	N/A	N/A	60	N/A	N/A	DOWNSTREAM	MODIFIER	NONE	N/A	N/A	Dyrk1a	protein_coding	ENSMUST00000122284	N/A	G/T	0	0.342105	N/A	N/A	0	13	N/A	N/A	37	38	22	26	diff	F3844	0.272727	0	0	0.363636	11	9	9	11
chr1_93507880_C_T	chr1	93507880	.	C	T	N/A	N/A	931.77	N/A	N/A	N/A	PASS	N/A	N/A	N/A	60	N/A	DOWNSTREAM	MODIFIER	NONE	N/A	N/A	42615	protein_coding	ENSMUST00000152476	N/A	C/T	0	N/A	0.546667	N/A	0	N/A	41	N/A	102	74	75	92	diff	F3847	0.351852	0.363636	0.37037	0.380952	54	33	54	21
chr1_191350146_C_T	chr1	191350146	rs33840808;rs33840807	C	T	1971.77	N/A	1468.77	N/A	PASS	N/A	PASS	N/A	60	N/A	60	N/A	DOWNSTREAM	MODIFIER	NONE	N/A	N/A	Ppp2r5a	protein_coding	ENSMUST00000067976	N/A	C/T	0.563107	N/A	1	N/A	58	N/A	37	N/A	103	52	37	55	diff	F3847	0.45	0.466667	0.882353	0.954545	40	30	17	22
chr17_35039373_T_G	chr17	35039373	rs108586330;rs33151903	T	G	319.77	N/A	1139.77	N/A	PASS	N/A	PASS	N/A	60	N/A	60	N/A	DOWNSTREAM	MODIFIER	NONE	N/A	N/A	Msh5	processed_transcript	ENSMUST00000172491	N/A	T/G	0.297297	N/A	0.695652	N/A	11	N/A	32	N/A	37	24	46	52	diff	F3847	0	1	0	0	21	2	7	3
chr8_70094816_A_G	chr8	70094816	rs212302696	A	G	N/A	N/A	108.77	N/A	N/A	N/A	PASS	N/A	N/A	N/A	56.57	N/A	DOWNSTREAM	MODIFIER	NONE	N/A	N/A	Hapln4	protein_coding	ENSMUST00000007738	N/A	A/G	0	N/A	1	N/A	0	N/A	5	N/A	4	0	5	4	diff	F3847	0.6	0.25	0.444444	0	5	8	9	1082
chr17_24685617_C_T	chr17	24685617	.	C	T	319.77	N/A	1105.77	N/A	PASS	N/A	PASS	N/A	60	N/A	60	N/A	DOWNSTREAM	MODIFIER	NONE	N/A	N/A	Syngr3	protein_coding	ENSMUST00000130936	N/A	C/T	0.37931	N/A	0.74	N/A	11	N/A	37	N/A	29	29	50	53	diff	F3847	0.535714	0.52381	0.622642	0.641026	28	21	53	39
chr1_180424531_A_G	chr1	180424531	rs13465654	A	G	692.77	N/A	724.77	N/A	PASS	N/A	PASS	N/A	60	N/A	60	N/A	UTR_3_PRIME	MODIFIER	NONE	N/A	N/A	Itpkb	protein_coding	ENSMUST00000070181	N/A	A/G	0.423077	N/A	1	N/A	22	N/A	18	N/A	52	39	18	40	diff	F3847	0.485714	0.479452	1	0	35	73	8	10
chr18_69684370_G_A	chr18	69684370	.	G	A	N/A	N/A	186.77	N/A	N/A	N/A	PASS	N/A	N/A	N/A	59.13	N/A	DOWNSTREAM	MODIFIER	NONE	N/A	N/A	Tcf4	protein_coding	ENSMUST00000066717	N/A	G/A	0	N/A	0.2	N/A	0	N/A	10	N/A	47	39	50	60	diff	F3847	0.307692	0	0.352113	0.333333	104	45	71	105
chr17_28060305_C_T	chr17	28060305	rs33089713	C	T	310.77	N/A	N/A	818.77	PASS	N/A	N/A	PASS	60	N/A	N/A	60	INTRON	MODIFIER	NONE	N/A	N/A	Anks1	protein_coding	ENSMUST00000114842	N/A	C/T	0.392857	N/A	N/A	0.785714	11	N/A	N/A	22	28	26	58	28	diff	F3852	0.333333	0.285714	0.6	0.571429	9	7	15	21
