# Supplementary material for: Cancer Stem Cells, not Bulk Tumor Cells, Determine Mechanisms of Resistance to SMO Inhibitors
Source: Cancer Res Commun. 2022 Jun 6;2(6):402–16. doi: 10.1158/2767-9764.CRC-22-0124 (PMC9853917; doi:10.1158/2767-9764.CRC-22-0124)
Supplement: Supplementary Table 4 — mutational profiles for Ptch;p53 SI-CSC tumors [file crc-22-0124-s03.xlsx]

## Sheet: Sheet1
Supplementary Table 4: Mutation profile of SICSC tumors
SICSC
_	CHROM	POS	ID	REF	ALT	C_QUAL	R1_QUAL	R2_QUAL	R3_QUAL	C_FILTER	R1_FILTER	R2_FILTER	R3_FILTER	C_MQ	R1_MQ	R2_MQ	R3_MQ	SNPEFF_EFFECT	SNPEFF_IMPACT	SNPEFF_FUNCTIONAL_CLASS	SNPEFF_CODON_CHANGE	SNPEFF_AMINO_ACID_CHANGE	SNPEFF_GENE_NAME	SNPEFF_GENE_BIOTYPE	SNPEFF_TRANSCRIPT_ID	SNPEFF_EXON_ID	SAMPLE_202325.GT	C_ALT_AF	R1_ALT_AF	R2_ALT_AF	R3_ALT_AF	C_ALT_AD	R1_ALT_AD	R2_ALT_AD	R3_ALT_AD	C_DP	R1_DP	R2_DP	R3_DP	SIM_DIFF	SOURCE	Mut_C_EF	Mut_R1_EF	Mut_R2_EF	Mut_R3_EF	Mut_C_E_DP	Mut_R1_E_DP	Mut_R2_E_DP	Mut_R3_E_DP
chr8_77572509_G_A	chr8	77572509	rs51911193	G	A	935.77	1374.77	1355.77	1626.77	PASS	PASS	PASS	PASS	60	60	60	60	NON_SYNONYMOUS_CODING	MODERATE	MISSENSE	Gtg/Atg	V611M	Prmt10	protein_coding	ENSMUST00000056237	exon_8_77572009_77572726	G/A	0.286885	0.518987	0.594595	0.520408	35	41	44	51	122	79	74	98	sim	F3863 F3865 F3872	0.264151	0.588235	0.724138	0.37931	53	34	29	29
chr8_79687671_C_T	chr8	79687671	rs36883189	C	T	961.77	1710.77	N/A	1752.77	PASS	PASS	N/A	PASS	60	60	N/A	60	NON_SYNONYMOUS_CODING	MODERATE	MISSENSE	Gtc/Atc	V504I	Abce1	protein_coding	ENSMUST00000080536	exon_8_79687664_79687806	C/T	0.289256	0.525773	N/A	0.604651	35	51	N/A	52	121	97	74	86	sim	F3863 F3872	0.927928	0.981651	0.987342	0.970588	111	109	79	102
chr13_13359406_T_C	chr13	13359406	rs48246783	T	C	N/A	N/A	182.77	97.78	N/A	N/A	PASS	PASS	N/A	N/A	48.43	44.06	NON_SYNONYMOUS_CODING	MODERATE	MISSENSE	tAt/tGt	Y355C	Gpr137b	protein_coding	ENSMUST00000021738	exon_13_13357623_13359423	T/C	0	N/A	0.545455	0.8	0	N/A	6	4	33	92	11	5	sim	F3865 F3872	0.777778	0.803279	0.869565	0.814815	54	183	23	54
chr8_123936937_G_C	chr8	123936937	rs31820089	G	C	769.77	N/A	866.77	1531.77	PASS	N/A	PASS	PASS	60	N/A	60	60	NON_SYNONYMOUS_CODING	MODERATE	MISSENSE	aCg/aGg	T289R	Nup133	protein_coding	ENSMUST00000044795	exon_8_123936831_123936986	G/C	0.260163	N/A	0.5	0.529412	32	N/A	31	45	123	82	62	85	sim	F3865 F3872	0.419753	0.473684	0.447761	0.460526	81	57	67	76
chr6_48659305_A_G	chr6	48659305	rs37474540	A	G	1856.77	7873.77	N/A	N/A	PASS	PASS	N/A	N/A	60	60	N/A	N/A	NON_SYNONYMOUS_CODING	MODERATE	MISSENSE	cAt/cGt	H668R	Gimap8	protein_coding	ENSMUST00000078223	exon_6_48658723_48660875	A/G	0.394904	0.731013	N/A	N/A	62	231	N/A	N/A	157	316	157	193	diff	F3863	0	1	0	0.6	4	2	1	10
chr6_48656204_G_A	chr6	48656204	rs29977715	G	A	1643.77	5541.77	N/A	N/A	PASS	PASS	N/A	N/A	60	60	N/A	N/A	NON_SYNONYMOUS_CODING	MODERATE	MISSENSE	cGg/cAg	R319Q	Gimap8	protein_coding	ENSMUST00000078223	exon_6_48656042_48656668	G/A	0.504587	0.758454	N/A	N/A	55	157	N/A	N/A	109	207	113	104	diff	F3863	0	0.666667	0	1	3	6	1	5
chr6_34387803_G_T	chr6	34387803	rs13464107	G	T	1630.77	2959.77	N/A	N/A	PASS	PASS	N/A	N/A	60	60	N/A	N/A	NON_SYNONYMOUS_CODING	MODERATE	MISSENSE	aaG/aaT	K38N	Akr1b10	protein_coding	ENSMUST00000115051	exon_6_34387756_34387839	G/T	0.398551	0.738095	N/A	N/A	55	93	N/A	N/A	138	126	121	124	diff	F3863	0.357143	0.538462	0.413043	0.291667	14	39	46	24
chr8_124028495_G_T	chr8	124028495	rs31830559	G	T	454.77	N/A	640.77	N/A	PASS	N/A	PASS	N/A	60	N/A	60	N/A	NON_SYNONYMOUS_CODING	MODERATE	MISSENSE	Gca/Tca	A314S	Urb2	nonsense_mediated_decay	ENSMUST00000034457	exon_8_124027859_124031189	G/T	0.294118	N/A	0.633333	N/A	15	N/A	19	N/A	51	51	30	47	diff	F3865	0.25	0.411765	0.666667	0.583333	28	17	9	12
chr8_116957262_A_G	chr8	116957262	rs36583869	A	G	300.77	656.77	N/A	N/A	PASS	PASS	N/A	N/A	60	60	N/A	N/A	NON_SYNONYMOUS_CODING	MODERATE	MISSENSE	Atg/Gtg	M554V	Atmin	protein_coding	ENSMUST00000109099	exon_8_116956253_116960445	A/G	0.220339	0.536585	N/A	N/A	13	22	N/A	N/A	59	41	49	37	diff	F3863	0.333333	0.510638	0.435897	0.342857	54	47	39	35
chr18_80197280_G_A	chr18	80197280	rs13460633	G	A	579.77	975.77	N/A	N/A	PASS	PASS	N/A	N/A	60	60	N/A	N/A	NON_SYNONYMOUS_CODING	MODERATE	MISSENSE	tCg/tTg	S156L	Rbfa	protein_coding	ENSMUST00000025462	exon_18_80197250_80197362	G/A	0.322581	0.576271	N/A	N/A	20	34	N/A	N/A	62	59	52	61	diff	F3863	0.571429	0.75	0.52381	0.666667	7	4	21	9
chr8_77563983_A_G	chr8	77563983	rs51757131	A	G	621.77	1163.77	N/A	N/A	PASS	PASS	N/A	N/A	60	60	N/A	N/A	NON_SYNONYMOUS_CODING	MODERATE	MISSENSE	gAa/gGa	E285G	Prmt10	protein_coding	ENSMUST00000056237	exon_8_77563976_77564082	A/G	0.25	0.515152	N/A	N/A	25	34	N/A	N/A	100	66	74	76	diff	F3863	0.7	0.8125	1	1	10	16	11	18
chr13_17989507_T_C	chr13	17989507	rs46515521	T	C	827.77	N/A	N/A	1048.77	PASS	N/A	N/A	PASS	45.75	N/A	N/A	46.96	NON_SYNONYMOUS_CODING	MODERATE	MISSENSE	cAt/cGt	H175R	Yae1d1	protein_coding	ENSMUST00000099735	exon_13_17986640_17989782	T/C	0.279279	N/A	N/A	0.695652	31	N/A	N/A	32	111	329	110	46	diff	F3872	0.551282	0.346154	0.65	0.606061	78	182	60	99
chr2_76710390_C_T	chr2	76710390	rs27947939	C	T	453.77	N/A	N/A	999.77	PASS	N/A	N/A	PASS	60	N/A	N/A	60	NON_SYNONYMOUS_CODING	MODERATE	MISSENSE	cGa/cAa	R25757Q	Ttn	protein_coding	ENSMUST00000011934	exon_2_76708776_76714212	C/T	0.298246	N/A	N/A	0.546875	17	N/A	N/A	35	57	63	51	64	diff	F3872	0	1	0	0	0	2	0	0
chr18_76994439_C_T	chr18	76994439	.	C	T	343.77	N/A	N/A	1121.77	PASS	N/A	N/A	PASS	60	N/A	N/A	60	NON_SYNONYMOUS_CODING	MODERATE	MISSENSE	cGc/cAc	R128H	Katnal2	protein_coding	ENSMUST00000137354	exon_18_76994394_76994504	C/T	0.3	N/A	N/A	0.586207	12	N/A	N/A	34	40	55	53	58	diff	F3872	0.666667	1	0.833333	0.25	9	2	6	8
chr13_21717881_A_G	chr13	21717881	.	A	G	714.77	N/A	745.77	N/A	PASS	N/A	PASS	N/A	39.52	N/A	40	N/A	NON_SYNONYMOUS_CODING	MODERATE	MISSENSE	Atc/Gtc	I75V	Hist1h3h	protein_coding	ENSMUST00000091754	exon_13_21717628_21718115	A/G	0.348485	N/A	0.724138	N/A	23	N/A	21	N/A	66	225	29	3	diff	F3865	0.230769	0	0.222222	0	13	119	9	83
chr1_171573786_C_A	chr1	171573786	rs107856459	C	A	N/A	N/A	N/A	609.77	N/A	N/A	N/A	PASS	N/A	N/A	N/A	59.03	NON_SYNONYMOUS_CODING	MODERATE	MISSENSE	aCa/aAa	T56K	Cd244	protein_coding	ENSMUST00000004829	exon_1_171573681_171574004	C/A	0	N/A	N/A	0.222222	0	N/A	N/A	14	52	57	47	63	diff	F3872	0	0	0	1	2	1	0	2
chr1_104953986_G_A	chr1	104953986	.	G	A	N/A	N/A	1081.77	N/A	N/A	N/A	PASS	N/A	N/A	N/A	60	N/A	NON_SYNONYMOUS_CODING	MODERATE	MISSENSE	gGc/gAc	G392D	Cdh20	protein_coding	ENSMUST00000062528	exon_1_104953829_104954082	G/A	0	N/A	0.540541	N/A	0	N/A	40	N/A	109	91	74	86	diff	F3865	0	0	0.472973	0	224	134	148	126
chr8_123929323_G_A	chr8	123929323	rs31826515	G	A	419.77	984.77	N/A	N/A	PASS	PASS	N/A	N/A	60	60	N/A	N/A	NON_SYNONYMOUS_CODING	MODERATE	MISSENSE	aCt/aTt	T473I	Nup133	protein_coding	ENSMUST00000044795	exon_8_123929244_123929401	G/A	0.264706	0.571429	N/A	N/A	18	32	N/A	N/A	68	56	53	51	diff	F3863	0.485437	0.372093	0.576923	0.595238	103	43	52	84
chr6_48572260_C_A	chr6	48572260	rs13461292	C	A	667.77	2206.77	N/A	N/A	PASS	PASS	N/A	N/A	60	60	N/A	N/A	NON_SYNONYMOUS_CODING	MODERATE	MISSENSE	tGc/tTc	C3F	Rarres2	protein_coding	ENSMUST00000009425	exon_6_48572088_48572290	C/A	0.470588	0.747126	N/A	N/A	24	65	N/A	N/A	51	87	59	57	diff	F3863	0	0	0	0.75	3	18	2	4
chr13_17989601_C_T	chr13	17989601	rs46320765	C	T	2141.77	N/A	N/A	1723.77	PASS	N/A	N/A	PASS	55.54	N/A	N/A	56.2	NON_SYNONYMOUS_CODING	MODERATE	MISSENSE	Gta/Ata	V144I	Yae1d1	protein_coding	ENSMUST00000099735	exon_13_17986640_17989782	C/T	0.443396	N/A	N/A	0.847458	47	N/A	N/A	50	106	271	87	59	diff	F3872	0.458904	0.361789	0.645833	0.504	146	246	96	125
chr6_42310599_A_C	chr6	42310599	rs36671711	A	C	565.77	1476.77	N/A	N/A	PASS	PASS	N/A	N/A	60	60	N/A	N/A	NON_SYNONYMOUS_CODING	MODERATE	MISSENSE	Aac/Cac	N428H	Clcn1	protein_coding	ENSMUST00000114684	exon_6_42310527_42310665	A/C	0.454545	0.741935	N/A	N/A	20	46	N/A	N/A	44	62	46	58	diff	F3863	0.666667	0.666667	0	0.8	3	3	2	5
chr11_120065911_C_A	chr11	120065911	rs27013828	C	A	888.77	N/A	1407.77	N/A	PASS	N/A	PASS	N/A	60	N/A	60	N/A	NON_SYNONYMOUS_CODING	MODERATE	MISSENSE	cGt/cTt	R901L	Azi1	protein_coding	ENSMUST00000106227	exon_11_120065911_120066053	C/A	0.444444	N/A	0.704918	N/A	32	N/A	43	N/A	72	72	61	83	diff	F3865	0.861111	0.872727	0.807692	0.896552	36	55	26	29
chr8_124559305_G_A	chr8	124559305	rs13470880	G	A	626.77	N/A	N/A	698.77	PASS	N/A	N/A	PASS	60	N/A	N/A	60	NON_SYNONYMOUS_CODING	MODERATE	MISSENSE	aCc/aTc	T346I	Agt	protein_coding	ENSMUST00000063278	exon_8_124559230_124559497	G/A	0.359375	N/A	N/A	0.666667	23	N/A	N/A	20	64	48	33	30	diff	F3872	0.666667	0	0.4	0	3	2	5	0
chr13_17989625_T_C	chr13	17989625	rs50603381	T	C	2141.77	N/A	N/A	1972.77	PASS	N/A	N/A	PASS	55.66	N/A	N/A	55.73	NON_SYNONYMOUS_CODING	MODERATE	MISSENSE	Att/Gtt	I136V	Yae1d1	protein_coding	ENSMUST00000099735	exon_13_17986640_17989782	T/C	0.43617	N/A	N/A	0.842105	41	N/A	N/A	48	94	244	85	57	diff	F3872	0.402878	0.2875	0.575221	0.53211	139	240	113	109
chr8_53517823_T_C	chr8	53517823	rs217547607	T	C	848.77	N/A	N/A	1311.77	PASS	N/A	N/A	PASS	60	N/A	N/A	60	NON_SYNONYMOUS_CODING	MODERATE	MISSENSE	Tct/Cct	S193P	Aga	protein_coding	ENSMUST00000033920	exon_8_53517754_53517868	T/C	0.303571	N/A	N/A	0.511905	34	N/A	N/A	43	112	107	86	84	diff	F3872	0.25	0.434783	0.6875	0	16	23	16	13
chr5_107507616_G_A	chr5	107507616	.	G	A	N/A	1014.77	N/A	N/A	N/A	PASS	N/A	N/A	N/A	60	N/A	N/A	NON_SYNONYMOUS_CODING	MODERATE	MISSENSE	Gaa/Aaa	E582K	A830010M20Rik	protein_coding	ENSMUST00000100951	exon_5_107506876_107509122	G/A	0	0.407895	N/A	N/A	0	31	N/A	N/A	77	76	97	75	diff	F3863	0	0.363636	0	0	14	11	23	17
chr1_184841383_C_T	chr1	184841383	rs13460778	C	T	738.77	1524.77	N/A	N/A	PASS	PASS	N/A	N/A	60	60	N/A	N/A	NON_SYNONYMOUS_CODING	MODERATE	MISSENSE	cGc/cAc	R106H	Marc2	protein_coding	ENSMUST00000068725	exon_1_184841254_184841427	C/T	0.403509	0.647059	N/A	N/A	23	44	N/A	N/A	57	68	55	64	diff	F3863	0.355556	0.315789	0.5625	0.486111	45	57	48	72
chr8_124030080_C_T	chr8	124030080	rs31826955	C	T	897.77	1224.77	N/A	N/A	PASS	PASS	N/A	N/A	60	60	N/A	N/A	NON_SYNONYMOUS_CODING	MODERATE	MISSENSE	tCt/tTt	S842F	Urb2	nonsense_mediated_decay	ENSMUST00000034457	exon_8_124027859_124031189	C/T	0.309091	0.569231	N/A	N/A	34	37	N/A	N/A	110	65	76	88	diff	F3863	0.419355	0.357143	0.619048	0.6	31	28	21	35
chr6_35190061_C_A	chr6	35190061	rs37147506	C	A	618.77	2425.77	N/A	N/A	PASS	PASS	N/A	N/A	60	60	N/A	N/A	NON_SYNONYMOUS_CODING	MODERATE	MISSENSE	gaC/gaA	D285E	Nup205	protein_coding	ENSMUST00000043815	exon_6_35189855_35190083	C/A	0.328571	0.651376	N/A	N/A	23	71	N/A	N/A	70	109	79	80	diff	F3863	0.541667	0.563218	0.385965	0.48	48	87	57	50
chr8_84832502_C_T	chr8	84832502	rs33181488	C	T	N/A	133.77	N/A	N/A	N/A	PASS	N/A	N/A	N/A	60	N/A	N/A	NON_SYNONYMOUS_CODING	MODERATE	MISSENSE	cCc/cTc	P71L	Gadd45gip1	protein_coding	ENSMUST00000036734	exon_8_84831522_84832640	C/T	0	0.466667	N/A	N/A	0	7	N/A	N/A	44	15	3	1	diff	F3863	0.338028	0.507692	0.478261	0.526882	71	65	69	93
chr13_14005207_G_A	chr13	14005207	rs50483850	G	A	179.77	N/A	N/A	718.77	PASS	N/A	N/A	PASS	60	N/A	N/A	60	NON_SYNONYMOUS_CODING	MODERATE	MISSENSE	gCg/gTg	A348V	Tbce	nonsense_mediated_decay	ENSMUST00000039894	exon_13_14005143_14005283	G/A	0.36	N/A	N/A	0.875	9	N/A	N/A	21	25	125	38	24	diff	F3872	0.375	0	0.703704	0.672414	32	240	27	58
chr7_110628598_G_C	chr7	110628598	.	G	C	N/A	N/A	1916.77	N/A	N/A	N/A	PASS	N/A	N/A	N/A	60	N/A	NON_SYNONYMOUS_CODING	MODERATE	MISSENSE	Gat/Cat	D58H	Adm	protein_coding	ENSMUST00000033054	exon_7_110628525_110628674	G/C	0	N/A	0.963636	N/A	0	N/A	53	N/A	72	90	55	52	diff	F3865	0	0	1	0	1	19	2	6
chr13_19139370_G_A	chr13	19139370	rs29224801	G	A	846.77	N/A	N/A	1440.77	PASS	N/A	N/A	PASS	60	N/A	N/A	60	NON_SYNONYMOUS_CODING	MODERATE	MISSENSE	Gtg/Atg	V597M	Amph	protein_coding	ENSMUST00000003345	exon_13_19139172_19139432	G/A	0.405405	N/A	N/A	0.84	30	N/A	N/A	42	74	140	54	50	diff	F3872	0.490909	0.241935	0.705882	0.672566	55	186	51	113
chr6_49042802_G_A	chr6	49042802	rs13478745	G	A	1164.77	3489.77	N/A	N/A	PASS	PASS	N/A	N/A	60	60	N/A	N/A	NON_SYNONYMOUS_CODING	MODERATE	MISSENSE	Gat/Aat	D36N	Gpnmb	protein_coding	ENSMUST00000031840	exon_6_49042767_49042919	G/A	0.433735	0.742857	N/A	N/A	36	104	N/A	N/A	83	140	59	86	diff	F3863	0	0.591837	0.555556	0	16	49	9	28
chr10_12690799_T_G	chr10	12690799	.	T	G	1074.77	1376.77	N/A	N/A	PASS	PASS	N/A	N/A	60	60	N/A	N/A	NON_SYNONYMOUS_CODING	MODERATE	MISSENSE	gaA/gaC	E1206D	Utrn	protein_coding	ENSMUST00000076817	exon_10_12690730_12690909	T/G	0.45	0.676923	N/A	N/A	36	44	N/A	N/A	80	65	74	75	diff	F3863	0	0.75	0.666667	0.764706	4	4	6	17
chr13_17989411_G_A	chr13	17989411	rs47070183	G	A	283.77	N/A	N/A	433.77	PASS	N/A	N/A	PASS	47.96	N/A	N/A	45.4	NON_SYNONYMOUS_CODING	MODERATE	MISSENSE	gCa/gTa	A207V	Yae1d1	protein_coding	ENSMUST00000099735	exon_13_17986640_17989782	G/A	0.152381	N/A	N/A	0.541667	16	N/A	N/A	13	105	248	68	24	diff	F3872	0.344828	0	0.272727	0.372093	58	229	33	43
chr17_40951761_T_C	chr17	40951761	rs218791958	T	C	811.77	N/A	N/A	6513.77	PASS	N/A	N/A	PASS	60	N/A	N/A	60	NON_SYNONYMOUS_CODING	MODERATE	MISSENSE	Tat/Cat	Y445H	Mut	protein_coding	ENSMUST00000169611	exon_17_40951755_40951866	T/C	0.268519	N/A	N/A	0.598513	29	N/A	N/A	161	108	239	241	269	diff	F3872	0.904762	1	0.909091	1	21	16	11	24
chr13_13752094_G_A	chr13	13752094	rs49840746	G	A	3437.77	N/A	N/A	3483.89	PASS	N/A	N/A	PASS	60	N/A	N/A	60	NON_SYNONYMOUS_CODING	MODERATE	MISSENSE	cGa/cAa	R3495Q	Lyst	protein_coding	ENSMUST00000110559	exon_13_13751943_13752132	G/A	0.460177	N/A	N/A	0.92233	104	N/A	N/A	95	226	590	154	103	diff	F3872	0.411765	0.25	0.5	0.65	17	52	10	20
chr6_39080997_A_G	chr6	39080997	rs232192557	A	G	676.77	2271.77	N/A	N/A	PASS	PASS	N/A	N/A	60	60	N/A	N/A	NON_SYNONYMOUS_CODING	MODERATE	MISSENSE	Aca/Gca	T429A	Tbxas1	protein_coding	ENSMUST00000003017	exon_6_39080939_39081076	A/G	0.396552	0.676768	N/A	N/A	23	67	N/A	N/A	58	99	52	58	diff	F3863	0	0	0	0.5	7	6	1	6
chr8_53520237_T_C	chr8	53520237	rs225115305	T	C	174.77	941.77	691.77	702.77	PASS	PASS	PASS	PASS	60	60	60	60	SYNONYMOUS_CODING	LOW	SILENT	ggT/ggC	G233	Aga	protein_coding	ENSMUST00000033920	exon_8_53520237_53520344	T/C	0.155172	0.516667	0.578947	0.522727	9	31	22	23	58	60	38	44	sim	F3863 F3865 F3872	1	1	1	0.75	6	7	8	4
chr13_20449492_T_C	chr13	20449492	rs13481720	T	C	331.77	614.77	557.77	678.77	PASS	PASS	PASS	PASS	60	60	60	60	SYNONYMOUS_CODING	LOW	SILENT	ttT/ttC	F441	Elmo1	protein_coding	ENSMUST00000072519	exon_13_20449470_20449606	T/C	0.24	1	0.53125	1	12	18	17	17	50	18	32	17	sim	F3863 F3865 F3872	0	0.75	0.714286	1	5	4	7	4
chr8_58911545_C_T	chr8	58911545	rs32647622	C	T	1258.77	2259.77	2263.77	2618.77	PASS	PASS	PASS	PASS	60	60	60	60	START_GAINED	LOW	NONE	N/A	N/A	Galntl6	protein_coding	ENSMUST00000077447	exon_8_58911337_58911627	C/T	0.222707	0.445161	0.503311	0.482759	51	69	76	84	229	155	151	174	sim	F3863 F3865 F3872	0	0	0	1	0	0	3	2
chr8_116956556_G_A	chr8	116956556	rs37051552	G	A	723.77	1457.77	1106.77	1295.77	PASS	PASS	PASS	PASS	60	60	60	60	SYNONYMOUS_CODING	LOW	SILENT	gaG/gaA	E318	Atmin	protein_coding	ENSMUST00000109099	exon_8_116956253_116960445	G/A	0.256637	0.486486	0.4625	0.468085	29	54	37	44	113	111	80	94	sim	F3863 F3865 F3872	0	0.290323	0.45	0.466667	45	31	40	30
chr8_84219938_G_A	chr8	84219938	rs32696917	G	A	327.77	684.77	N/A	862.77	PASS	PASS	N/A	PASS	60	60	N/A	60	SYNONYMOUS_CODING	LOW	SILENT	caC/caT	H696	Zswim4	protein_coding	ENSMUST00000039480	exon_8_84219826_84219980	G/A	0.237288	0.534884	N/A	0.586957	14	23	N/A	27	59	43	60	46	sim	F3863 F3872	0.291667	0.352941	0.619048	0.6	24	34	21	35
chr11_119253260_A_G	chr11	119253260	rs251736689	A	G	N/A	455.77	235.77	N/A	N/A	PASS	PASS	N/A	N/A	60	60	N/A	SYNONYMOUS_CODING	LOW	SILENT	gcA/gcG	A870	Ccdc40	protein_coding	ENSMUST00000035935	exon_11_119253250_119253419	A/G	0	0.695652	0.6	N/A	0	16	9	N/A	16	23	15	21	sim	F3863 F3865	0	0	0	1	2	1	2	2
chr8_58472855_G_A	chr8	58472855	rs51147017	G	A	917.77	1077.77	N/A	967.77	PASS	PASS	N/A	PASS	60	60	N/A	60	SYNONYMOUS_CODING	LOW	SILENT	atC/atT	I125	Galntl6	protein_coding	ENSMUST00000077447	exon_8_58472844_58472982	G/A	0.316832	0.642857	N/A	0.574074	32	36	N/A	31	101	56	57	54	sim	F3863 F3872	0	0	1	1	0	0	2	3
chr8_60938573_A_G	chr8	60938573	rs32985863	A	G	956.77	1306.77	N/A	1547.77	PASS	PASS	N/A	PASS	60	60	N/A	60	SYNONYMOUS_CODING	LOW	SILENT	gtT/gtC	V104	Clcn3	protein_coding	ENSMUST00000056508	exon_8_60938548_60938647	A/G	0.286822	0.516129	N/A	0.551724	37	48	N/A	48	129	93	76	87	sim	F3863 F3872	0.774194	0.96	0.87931	0.915254	31	25	58	59
chr8_116507552_C_T	chr8	116507552	rs242223244	C	T	393.77	874.77	796.77	N/A	PASS	PASS	PASS	N/A	60	60	60	N/A	SYNONYMOUS_CODING	LOW	SILENT	atC/atT	I18	Dynlrb2	protein_coding	ENSMUST00000078170	exon_8_116507502_116507577	C/T	0.2	0.458333	0.477273	N/A	12	22	21	N/A	60	48	44	51	sim	F3863 F3865	1	0	0	0	2	0	0	0
chr8_60941350_C_T	chr8	60941350	rs13466965	C	T	1261.77	1873.77	1250.77	N/A	PASS	PASS	PASS	N/A	60	60	60	N/A	SYNONYMOUS_CODING	LOW	SILENT	ttG/ttA	L17	Clcn3	protein_coding	ENSMUST00000093490	exon_8_60941257_60941414	C/T	0.3	0.58	0.527778	N/A	42	58	38	N/A	140	100	72	103	sim	F3863 F3865	0	0.526316	0.486111	0.366667	69	38	72	60
chr17_44080921_C_T	chr17	44080921	.	C	T	641.77	1505.77	N/A	1485.77	PASS	PASS	N/A	PASS	60	60	N/A	60	SYNONYMOUS_CODING	LOW	SILENT	gtC/gtT	V80	Enpp5	protein_coding	ENSMUST00000024756	exon_17_44080647_44081510	C/T	0.252874	0.516129	N/A	0.485714	22	48	N/A	51	87	93	97	105	sim	F3863 F3872	0	0.642857	0.384615	0	2	14	13	34
chr18_78032999_T_C	chr18	78032999	rs37216255	T	C	395.77	1313.77	N/A	1275.77	PASS	PASS	N/A	PASS	60	60	N/A	60	SYNONYMOUS_CODING	LOW	SILENT	ctT/ctC	L2537	Epg5	protein_coding	ENSMUST00000044622	exon_18_78032925_78035027	T/C	0.282609	0.611111	N/A	0.561404	13	33	N/A	32	46	54	42	57	sim	F3863 F3872	0.888889	0.8	0.941176	0.444444	9	5	17	27
chr8_116971515_G_A	chr8	116971515	rs37935155	G	A	339.77	746.77	N/A	944.77	PASS	PASS	N/A	PASS	60	60	N/A	60	SYNONYMOUS_CODING	LOW	SILENT	agC/agT	S284	1700030J22Rik	protein_coding	ENSMUST00000070577	exon_8_116969599_116972156	G/A	0.266667	0.545455	N/A	0.666667	16	24	N/A	28	60	44	34	42	sim	F3863 F3872	0	1	0	0	3	4	0	0
chr8_79673460_G_A	chr8	79673460	rs37137057	G	A	491.77	1337.77	N/A	1608.77	PASS	PASS	N/A	PASS	60	60	N/A	60	SYNONYMOUS_CODING	LOW	SILENT	tcG/tcA	S933	Otud4	protein_coding	ENSMUST00000173286	exon_8_79672768_79677672	G/A	0.186441	0.465116	N/A	0.5875	22	40	N/A	47	118	86	80	80	sim	F3863 F3872	0.338983	0.440678	0.596774	0.518987	118	118	62	79
chr8_99279486_C_T	chr8	99279486	rs32921877	C	T	1223.77	N/A	1316.77	2269.77	PASS	N/A	PASS	PASS	60	N/A	60	60	SYNONYMOUS_CODING	LOW	SILENT	aaG/aaA	K156	Cdh8	protein_coding	ENSMUST00000093249	exon_8_99279407_99279701	C/T	0.306122	N/A	0.54878	0.563025	45	N/A	45	67	147	95	82	119	sim	F3865 F3872	0.363636	0	0.32	0.542373	11	7	25	59
chr11_116871307_C_T	chr11	116871307	rs226244123	C	T	119.77	356.77	430.77	N/A	PASS	PASS	PASS	N/A	60	60	60	N/A	SYNONYMOUS_CODING	LOW	SILENT	ttC/ttT	F244	Mfsd11	nonsense_mediated_decay	ENSMUST00000153084	exon_11_116871294_116871468	C/T	0.227273	0.6875	0.705882	N/A	5	11	12	N/A	22	16	17	29	sim	F3863 F3865	0.777778	0.636364	0.909091	0.9	9	11	11	10
chr8_116957552_G_A	chr8	116957552	rs251281903	G	A	496.77	1103.77	N/A	848.77	PASS	PASS	N/A	PASS	60	60	N/A	60	SYNONYMOUS_CODING	LOW	SILENT	gaG/gaA	E650	Atmin	protein_coding	ENSMUST00000109099	exon_8_116956253_116960445	G/A	0.240506	0.539683	N/A	0.466667	19	34	N/A	28	79	63	41	60	sim	F3863 F3872	0.290323	0.487179	0.652174	0.657143	31	39	23	35
chr17_28057353_G_A	chr17	28057353	rs13482935	G	A	112.77	825.77	572.77	N/A	PASS	PASS	PASS	N/A	60	60	60	N/A	SYNONYMOUS_CODING	LOW	SILENT	cgG/cgA	R1002	Anks1	protein_coding	ENSMUST00000088027	exon_17_28057327_28057464	G/A	0.241379	0.576923	0.62069	N/A	7	30	18	N/A	29	52	29	54	sim	F3863 F3865	0.722222	0.75	0.813953	0.653061	18	20	43	49
chr6_34746636_G_A	chr6	34746636	rs36933775	G	A	405.77	1222.77	921.77	N/A	PASS	PASS	PASS	N/A	60	60	60	N/A	SYNONYMOUS_CODING	LOW	SILENT	acG/acA	T412	Cald1	protein_coding	ENSMUST00000115027	exon_6_34745619_34746639	G/A	0.307692	0.603175	0.568627	N/A	16	38	29	N/A	52	63	51	55	sim	F3863 F3865	0.37931	0.4	0.428571	0.230769	29	20	21	26
chr2_80331307_C_G	chr2	80331307	rs28069404	C	G	1166.77	N/A	1774.77	N/A	PASS	N/A	PASS	N/A	60	N/A	60	N/A	SYNONYMOUS_CODING	LOW	SILENT	gcC/gcG	A296	Dnajc10	processed_transcript	ENSMUST00000028392	exon_2_80331269_80331406	C/G	0.357798	N/A	0.617021	N/A	39	N/A	58	N/A	109	141	94	158	diff	F3865	0.591837	0.626866	0.638889	0.765625	49	67	36	64
chr6_48596534_C_T	chr6	48596534	rs30312849	C	T	668.77	1582.77	N/A	N/A	PASS	PASS	N/A	N/A	60	60	N/A	N/A	SYNONYMOUS_CODING	LOW	SILENT	gcC/gcT	A76	Repin1	protein_coding	ENSMUST00000009420	exon_6_48596293_48599081	C/T	0.464286	0.708333	N/A	N/A	26	51	N/A	N/A	56	72	17	3	diff	F3863	0	0.784615	0.5	0.513514	12	65	20	37
chr1_156446678_T_C	chr1	156446678	rs31277518	T	C	320.77	N/A	528.77	N/A	PASS	N/A	PASS	N/A	60	N/A	60	N/A	SYNONYMOUS_CODING	LOW	SILENT	ctA/ctG	L54	Soat1	protein_coding	ENSMUST00000051396	exon_1_156446541_156446692	T/C	0.275	N/A	0.615385	N/A	11	N/A	16	N/A	40	38	26	49	diff	F3865	0.571429	0.375	0.5	0.2	14	8	12	10
chr6_49244926_C_T	chr6	49244926	rs36390902	C	T	1437.77	5473.77	N/A	N/A	PASS	PASS	N/A	N/A	60	60	N/A	N/A	SYNONYMOUS_CODING	LOW	SILENT	tcG/tcA	S260	Tra2a	protein_coding	ENSMUST00000031841	exon_6_49244868_49244935	C/T	0.401709	0.744076	N/A	N/A	47	157	N/A	N/A	117	211	119	140	diff	F3863	0.697561	0.90566	0.72028	0.631579	205	318	143	190
chr1_139458014_T_C	chr1	139458014	rs30922156	T	C	962.77	1858.77	N/A	N/A	PASS	PASS	N/A	N/A	60	60	N/A	N/A	SYNONYMOUS_CODING	LOW	SILENT	tcT/tcC	S465	Aspm	retained_intron	ENSMUST00000053364	exon_1_139457037_139458444	T/C	0.336957	0.619565	N/A	N/A	31	57	N/A	N/A	92	92	104	107	diff	F3863	0.590909	0.51087	0.548387	0.54902	66	92	62	102
chr8_88314124_C_T	chr8	88314124	rs48305439	C	T	230.77	712.77	N/A	N/A	PASS	PASS	N/A	N/A	60	60	N/A	N/A	SYNONYMOUS_CODING	LOW	SILENT	gaC/gaT	D330	Adcy7	protein_coding	ENSMUST00000098521	exon_8_88314089_88314216	C/T	0.219512	0.518519	N/A	N/A	9	28	N/A	N/A	41	54	27	40	diff	F3863	0	0	0	0.625	0	9	0	8
chr13_11566875_T_C	chr13	11566875	rs259707676	T	C	652.77	N/A	N/A	1031.77	PASS	N/A	N/A	PASS	60	N/A	N/A	60	SYNONYMOUS_CODING	LOW	SILENT	ccA/ccG	P4801	Ryr2	protein_coding	ENSMUST00000021750	exon_13_11566848_11566982	T/C	0.392857	N/A	N/A	0.815789	22	N/A	N/A	31	56	148	45	38	diff	F3872	0	0	1	1	0	0	2	4
chr8_124028302_T_C	chr8	124028302	rs31829633	T	C	358.77	N/A	678.77	N/A	PASS	N/A	PASS	N/A	60	N/A	60	N/A	SYNONYMOUS_CODING	LOW	SILENT	gaT/gaC	D249	Urb2	nonsense_mediated_decay	ENSMUST00000034457	exon_8_124027859_124031189	T/C	0.259259	N/A	0.605263	N/A	14	N/A	23	N/A	54	60	38	50	diff	F3865	0.714286	0.470588	0.4	0.513514	28	17	30	37
chr6_48619658_G_T	chr6	48619658	rs30313340	G	T	613.77	3149.77	N/A	N/A	PASS	PASS	N/A	N/A	60	60	N/A	N/A	SYNONYMOUS_CODING	LOW	SILENT	acG/acT	T155	Zfp775	protein_coding	ENSMUST00000061720	exon_6_48619225_48623227	G/T	0.458333	0.77193	N/A	N/A	22	88	N/A	N/A	48	114	52	42	diff	F3863	0.333333	0.704918	0.769231	0.727273	12	61	13	11
chr8_117190721_G_A	chr8	117190721	rs36244801	G	A	714.77	1249.77	N/A	N/A	PASS	PASS	N/A	N/A	60	60	N/A	N/A	SYNONYMOUS_CODING	LOW	SILENT	cgG/cgA	R303	Gan	protein_coding	ENSMUST00000064488	exon_8_117190664_117190785	G/A	0.346154	0.6	N/A	N/A	27	42	N/A	N/A	78	70	61	71	diff	F3863	0.333333	0.777778	0	0.625	9	9	11	24
chr6_42320798_A_G	chr6	42320798	rs217294897	A	G	1223.77	2601.77	N/A	N/A	PASS	PASS	N/A	N/A	60	60	N/A	N/A	SYNONYMOUS_CODING	LOW	SILENT	cgT/cgC	R124	Fam131b	protein_coding	ENSMUST00000095974	exon_6_42320788_42320985	A/G	0.454545	0.66087	N/A	N/A	40	76	N/A	N/A	88	115	85	116	diff	F3863	0.9375	0.94	1	0.846154	16	50	2	13
chr6_49056218_G_A	chr6	49056218	rs30014223	G	A	706.77	1764.77	N/A	N/A	PASS	PASS	N/A	N/A	60	60	N/A	N/A	SYNONYMOUS_CODING	LOW	SILENT	aaG/aaA	K543	Gpnmb	protein_coding	ENSMUST00000031840	exon_6_49056161_49058182	G/A	0.55814	0.833333	N/A	N/A	24	50	N/A	N/A	43	60	27	49	diff	F3863	0.25	0.484848	0.214286	0	8	66	14	18
chr8_69228845_C_T	chr8	69228845	.	C	T	171.77	N/A	N/A	415.77	PASS	N/A	N/A	PASS	60	N/A	N/A	60	SYNONYMOUS_CODING	LOW	SILENT	ctC/ctT	L396	Zfp930	protein_coding	ENSMUST00000110216	exon_8_69227843_69228980	C/T	0.2	N/A	N/A	0.541667	10	N/A	N/A	13	50	31	37	24	diff	F3872	0.444444	0.485714	0.432432	0.548387	54	35	37	31
chr6_34387827_C_T	chr6	34387827	rs39339386	C	T	1780.77	2982.77	N/A	N/A	PASS	PASS	N/A	N/A	60	60	N/A	N/A	SYNONYMOUS_CODING	LOW	SILENT	ttC/ttT	F46	Akr1b10	protein_coding	ENSMUST00000115051	exon_6_34387756_34387839	C/T	0.425373	0.728814	N/A	N/A	57	86	N/A	N/A	134	118	106	107	diff	F3863	0.375	0.514286	0.365854	0.24	16	35	41	25
chr10_29344545_G_A	chr10	29344545	rs49119394	G	A	573.77	N/A	828.77	N/A	PASS	N/A	PASS	N/A	60	N/A	60	N/A	SYNONYMOUS_CODING	LOW	SILENT	acG/acA	T232	Echdc1	protein_coding	ENSMUST00000160399	exon_10_29344341_29345560	G/A	0.358491	N/A	0.636364	N/A	19	N/A	28	N/A	53	68	44	57	diff	F3865	0.486486	0.609756	0.575758	0.671429	74	82	66	70
chr8_60934572_G_A	chr8	60934572	rs37111880	G	A	1454.77	N/A	N/A	2128.77	PASS	N/A	N/A	PASS	60	N/A	N/A	60	SYNONYMOUS_CODING	LOW	SILENT	taC/taT	Y156	Clcn3	protein_coding	ENSMUST00000093490	exon_8_60934485_60934607	G/A	0.307229	N/A	N/A	0.515385	51	N/A	N/A	67	166	126	132	130	diff	F3872	0	0.382353	0.575	0.564103	40	34	40	39
chr8_79343837_G_A	chr8	79343837	rs36961475	G	A	1028.77	1429.77	N/A	N/A	PASS	PASS	N/A	N/A	60	60	N/A	N/A	SYNONYMOUS_CODING	LOW	SILENT	agC/agT	S357	Smad1	protein_coding	ENSMUST00000066091	exon_8_79343654_79343910	G/A	0.304	0.526316	N/A	N/A	38	50	N/A	N/A	125	95	55	86	diff	F3863	0.257143	0.340426	0.365854	0.431373	35	47	41	51
chr13_17989659_T_C	chr13	17989659	rs46315138;rs265713122	T	C	2141.77	N/A	N/A	1406.77	PASS	N/A	N/A	PASS	54.8	N/A	N/A	54.07	SYNONYMOUS_CODING	LOW	SILENT	acA/acG	T124	Yae1d1	protein_coding	ENSMUST00000099735	exon_13_17986640_17989782	T/C	0.402439	N/A	N/A	0.851064	33	N/A	N/A	40	82	208	64	47	diff	F3872	0.378378	0.303571	0.521739	0.586538	111	224	115	104
chr17_35010527_C_T	chr17	35010527	.	C	T	536.77	1061.77	N/A	N/A	PASS	PASS	N/A	N/A	60	60	N/A	N/A	SYNONYMOUS_CODING	LOW	SILENT	acC/acT	T373	Vars	protein_coding	ENSMUST00000087315	exon_17_35010506_35010670	C/T	0.345455	0.6875	N/A	N/A	19	33	N/A	N/A	55	48	55	58	diff	F3863	0.844444	0.821429	0.711538	0.822785	45	56	52	79
chr6_49045318_A_C	chr6	49045318	rs30606480	A	C	449.77	1686.77	N/A	N/A	PASS	PASS	N/A	N/A	60	60	N/A	N/A	SYNONYMOUS_CODING	LOW	SILENT	acA/acC	T127	Gpnmb	protein_coding	ENSMUST00000031840	exon_6_49045305_49045478	A/C	0.5	0.79661	N/A	N/A	14	47	N/A	N/A	28	59	21	37	diff	F3863	0	0.68	1	0.75	5	25	4	4
chr11_114793972_G_A	chr11	114793972	rs254325799	G	A	258.77	N/A	N/A	802.77	PASS	N/A	N/A	PASS	60	N/A	N/A	60	SYNONYMOUS_CODING	LOW	SILENT	ttC/ttT	F80	Btbd17	processed_transcript	ENSMUST00000000206	exon_11_114793850_114794126	G/A	0.289474	N/A	N/A	0.604651	11	N/A	N/A	26	38	46	56	43	diff	F3872	0.653846	0.514286	0.6	0.464646	26	35	95	99
chr6_13836799_A_C	chr6	13836799	rs241670682	A	C	524.77	1413.77	N/A	N/A	PASS	PASS	N/A	N/A	60	60	N/A	N/A	SYNONYMOUS_CODING	LOW	SILENT	gtT/gtG	V35	Gpr85	protein_coding	ENSMUST00000060442	exon_6_13834458_13837073	A/C	0.375	0.632353	N/A	N/A	18	43	N/A	N/A	48	68	46	51	diff	F3863	0.432432	0.7	0.621622	0.428571	74	140	74	98
chr6_39497133_T_C	chr6	39497133	rs38985899	T	C	477.77	1787.77	N/A	N/A	PASS	PASS	N/A	N/A	60	60	N/A	N/A	SYNONYMOUS_CODING	LOW	SILENT	gaA/gaG	E422	Dennd2a	protein_coding	ENSMUST00000036877	exon_6_39496974_39497174	T/C	0.461538	0.743243	N/A	N/A	18	55	N/A	N/A	39	74	46	70	diff	F3863	0.445161	0.630631	0.506024	0.557214	155	222	166	201
chr13_17989634_A_G	chr13	17989634	rs48005007	A	G	2141.77	N/A	N/A	1972.77	PASS	N/A	N/A	PASS	56.02	N/A	N/A	55.78	SYNONYMOUS_CODING	LOW	SILENT	Ttg/Ctg	L133	Yae1d1	protein_coding	ENSMUST00000099735	exon_13_17986640_17989782	A/G	0.434783	N/A	N/A	0.839286	40	N/A	N/A	47	92	241	81	56	diff	F3872	0.409449	0.304721	0.556522	0.572816	127	233	115	103
chr8_99400735_G_A	chr8	99400735	rs47725346	G	A	4381.77	N/A	5541.77	N/A	PASS	N/A	PASS	N/A	60	N/A	60	N/A	SYNONYMOUS_CODING	LOW	SILENT	ctC/ctT	L81	Cdh8	protein_coding	ENSMUST00000093249	exon_8_99400726_99401177	G/A	0.293436	N/A	0.523392	N/A	152	N/A	179	N/A	518	359	342	415	diff	F3865	0.333333	0.75	0.866667	0.878788	6	4	15	33
chr6_39419543_A_G	chr6	39419543	.	A	G	932.77	2099.77	N/A	N/A	PASS	PASS	N/A	N/A	60	60	N/A	N/A	START_GAINED	LOW	NONE	N/A	N/A	Mkrn1	protein_coding	ENSMUST00000114823	exon_6_39419467_39419776	A/G	0.461538	0.706522	N/A	N/A	30	65	N/A	N/A	65	92	73	84	diff	F3863	1	0	0	0	2	151	79	128
chr16_45663369_A_G	chr16	45663369	rs4181616	A	G	315.77	N/A	N/A	770.77	PASS	N/A	N/A	PASS	60	N/A	N/A	60	SYNONYMOUS_CODING	LOW	SILENT	agT/agC	S290	Tmprss7	protein_coding	ENSMUST00000036617	exon_16_45663269_45663385	A/G	0.325	N/A	N/A	0.685714	13	N/A	N/A	24	40	36	33	35	diff	F3872	0	0	1	0	0	1	2	1
chr8_84223828_G_A	chr8	84223828	rs48692185	G	A	231.77	N/A	N/A	379.77	PASS	N/A	N/A	PASS	60	N/A	N/A	60	SYNONYMOUS_CODING	LOW	SILENT	ctC/ctT	L584	Zswim4	protein_coding	ENSMUST00000039480	exon_8_84223671_84223925	G/A	0.263158	N/A	N/A	0.6875	10	N/A	N/A	11	38	33	22	16	diff	F3872	0	0.346154	0.515152	0.424242	31	26	33	33
chr14_70925902_C_T	chr14	70925902	rs31299376	C	T	565.77	N/A	N/A	1173.77	PASS	N/A	N/A	PASS	60	N/A	N/A	60	SYNONYMOUS_CODING	LOW	SILENT	ttC/ttT	F208	Gfra2	protein_coding	ENSMUST00000022699	exon_14_70925718_70926072	C/T	0.45	N/A	N/A	0.72549	18	N/A	N/A	37	40	61	39	51	diff	F3872	0.666667	0.8125	0.727273	0.731707	6	16	11	41
chr11_120287060_G_A	chr11	120287060	.	G	A	898.77	N/A	814.77	N/A	PASS	N/A	PASS	N/A	60	N/A	60	N/A	SYNONYMOUS_CODING	LOW	SILENT	gcG/gcA	A2148	Bahcc1	protein_coding	ENSMUST00000044985	exon_11_120286924_120288104	G/A	0.407895	N/A	0.685714	N/A	31	N/A	24	N/A	76	89	35	25	diff	F3865	0.490196	0.521277	0.551724	0.56338	51	94	29	71
chr6_39357469_G_A	chr6	39357469	.	G	A	317.77	1012.77	N/A	N/A	PASS	PASS	N/A	N/A	60	60	N/A	N/A	SYNONYMOUS_CODING	LOW	SILENT	agC/agT	S102	Slc37a3	protein_coding	ENSMUST00000090243	exon_6_39357400_39357483	G/A	0.384615	0.731707	N/A	N/A	10	30	N/A	N/A	26	41	22	27	diff	F3863	0.617647	0.769231	0.488372	0.425532	34	39	43	47
chr17_24700181_G_A	chr17	24700181	rs236783527	G	A	853.77	N/A	N/A	1458.77	PASS	N/A	N/A	PASS	60	N/A	N/A	60	SYNONYMOUS_CODING	LOW	SILENT	tcG/tcA	S292	Noxo1	protein_coding	ENSMUST00000019464	exon_17_24700121_24700529	G/A	0.393939	N/A	N/A	0.623377	26	N/A	N/A	48	66	77	83	77	diff	F3872	0	0.454545	1	0	2	11	2	4
chr13_11577803_C_T	chr13	11577803	rs265086389	C	T	1081.77	N/A	N/A	1501.77	PASS	N/A	N/A	PASS	60	N/A	N/A	60	SYNONYMOUS_CODING	LOW	SILENT	aaG/aaA	K4688	Ryr2	protein_coding	ENSMUST00000021750	exon_13_11577780_11577913	C/T	0.458333	N/A	N/A	0.849057	33	N/A	N/A	45	72	160	49	53	diff	F3872	0	0	0	1	1	0	1	3
chr13_11665924_G_A	chr13	11665924	rs50120436	G	A	1512.77	N/A	N/A	1295.77	PASS	N/A	N/A	PASS	60	N/A	N/A	60	SYNONYMOUS_CODING	LOW	SILENT	aaC/aaT	N3178	Ryr2	protein_coding	ENSMUST00000021750	exon_13_11665881_11666011	G/A	0.423729	N/A	N/A	0.857143	50	N/A	N/A	42	118	187	94	49	diff	F3872	0	0	1	1	0	0	5	6
chr8_116957444_A_G	chr8	116957444	rs220490311	A	G	630.77	913.77	N/A	N/A	PASS	PASS	N/A	N/A	60	60	N/A	N/A	SYNONYMOUS_CODING	LOW	SILENT	ggA/ggG	G614	Atmin	protein_coding	ENSMUST00000109099	exon_8_116956253_116960445	A/G	0.278481	0.596154	N/A	N/A	22	31	N/A	N/A	79	52	47	49	diff	F3863	0.317073	0.452381	0.666667	0.53125	41	42	27	32
chr6_48620183_C_A	chr6	48620183	rs13467006	C	A	687.77	2771.77	N/A	N/A	PASS	PASS	N/A	N/A	60	60	N/A	N/A	SYNONYMOUS_CODING	LOW	SILENT	acC/acA	T330	Zfp775	protein_coding	ENSMUST00000061720	exon_6_48619225_48623227	C/A	0.47619	0.786408	N/A	N/A	20	81	N/A	N/A	42	103	40	13	diff	F3863	0	0.72973	0.272727	0.266667	6	37	11	15
chr8_124550308_C_T	chr8	124550308	rs13471017	C	T	764.77	N/A	1355.77	N/A	PASS	N/A	PASS	N/A	60	N/A	60	N/A	SYNONYMOUS_CODING	LOW	SILENT	atC/atT	I684	Cog2	protein_coding	ENSMUST00000034460	exon_8_124550167_124550350	C/T	0.333333	N/A	0.602941	N/A	28	N/A	41	N/A	84	56	68	61	diff	F3865	0.340426	0.439024	0.555556	0.545455	47	41	36	44
chr8_84246655_G_A	chr8	84246655	rs13459771	G	A	588.77	1081.77	N/A	N/A	PASS	PASS	N/A	N/A	60	60	N/A	N/A	SYNONYMOUS_CODING	LOW	SILENT	gaC/gaT	D61	D8Ertd738e	protein_coding	ENSMUST00000019506	exon_8_84246237_84246693	G/A	0.255102	0.481481	N/A	N/A	25	39	N/A	N/A	98	81	61	66	diff	F3863	0.27191	0.455128	0.501976	0.44358	445	312	253	257
chr6_39081024_C_T	chr6	39081024	rs36306039	C	T	807.77	2385.77	N/A	N/A	PASS	PASS	N/A	N/A	60	60	N/A	N/A	SYNONYMOUS_CODING	LOW	SILENT	Cta/Tta	L438	Tbxas1	protein_coding	ENSMUST00000003017	exon_6_39080939_39081076	C/T	0.397059	0.706422	N/A	N/A	27	77	N/A	N/A	68	109	61	66	diff	F3863	0	0	0	0.428571	7	5	2	7
chr6_35079961_T_C	chr6	35079961	rs37430528	T	C	1219.77	2657.77	N/A	N/A	PASS	PASS	N/A	N/A	60	60	N/A	N/A	SYNONYMOUS_CODING	LOW	SILENT	aaA/aaG	K58	Cnot4	protein_coding	ENSMUST00000044163	exon_6_35079961_35080226	T/C	0.458824	0.738318	N/A	N/A	39	79	N/A	N/A	85	107	79	79	diff	F3863	1	1	1	1	12	27	17	18
chr8_78505771_A_G	chr8	78505771	rs13460417	A	G	1285.77	N/A	1761.77	N/A	PASS	N/A	PASS	N/A	53.98	N/A	54.27	N/A	SYNONYMOUS_CODING	LOW	SILENT	cgT/cgC	R314	Rbmxl1	protein_coding	ENSMUST00000049245	exon_8_78505271_78506863	A/G	0.317568	N/A	0.533981	N/A	47	N/A	55	N/A	148	118	103	149	diff	F3865	0.333333	0.518072	0.493776	0.492701	459	415	241	274
chr8_116973587_C_G	chr8	116973587	rs37330444	C	G	163.77	N/A	N/A	724.77	PASS	N/A	N/A	PASS	60	N/A	N/A	60	SYNONYMOUS_CODING	LOW	SILENT	acG/acC	T25	1700030J22Rik	protein_coding	ENSMUST00000070577	exon_8_116973452_116973699	C/G	0.210526	N/A	N/A	0.52381	8	N/A	N/A	22	38	32	29	42	diff	F3872	0	0	0.666667	0	0	1	3	0
chr6_35223610_A_G	chr6	35223610	rs39339755	A	G	555.77	1736.77	N/A	N/A	PASS	PASS	N/A	N/A	60	60	N/A	N/A	SYNONYMOUS_CODING	LOW	SILENT	acA/acG	T1136	Nup205	protein_coding	ENSMUST00000043815	exon_6_35223513_35223662	A/G	0.370968	0.6875	N/A	N/A	23	55	N/A	N/A	62	80	56	57	diff	F3863	0.495238	0.578947	0.518182	0.475	105	190	110	120
chr6_48708049_C_T	chr6	48708049	rs30714312	C	T	197.77	1398.77	N/A	N/A	PASS	PASS	N/A	N/A	60	60	N/A	N/A	SYNONYMOUS_CODING	LOW	SILENT	tcG/tcA	S34	Gimap6	protein_coding	ENSMUST00000053661	exon_6_48707959_48708225	C/T	0.37037	0.707692	N/A	N/A	10	46	N/A	N/A	27	65	49	44	diff	F3863	0	0	0.666667	0.230769	13	4	3	13
chr13_17989590_T_A	chr13	17989590	rs51363477	T	A	2141.77	N/A	N/A	1772.77	PASS	N/A	N/A	PASS	55.39	N/A	N/A	55.91	SYNONYMOUS_CODING	LOW	SILENT	tcA/tcT	S147	Yae1d1	protein_coding	ENSMUST00000099735	exon_13_17986640_17989782	T/A	0.435185	N/A	N/A	0.85	47	N/A	N/A	51	108	280	93	60	diff	F3872	0.49375	0.358974	0.591837	0.525926	160	273	98	135
chr6_49044058_T_C	chr6	49044058	rs30318156	T	C	601.77	2937.77	N/A	N/A	PASS	PASS	N/A	N/A	60	60	N/A	N/A	SYNONYMOUS_CODING	LOW	SILENT	acT/acC	T95	Gpnmb	protein_coding	ENSMUST00000031840	exon_6_49043997_49044140	T/C	0.468085	0.763158	N/A	N/A	22	87	N/A	N/A	47	114	66	60	diff	F3863	0.666667	0.306122	0.384615	0.521739	3	49	13	23
chr16_3928616_G_A	chr16	3928616	rs32218374	G	A	943.77	N/A	N/A	1838.77	PASS	N/A	N/A	PASS	60	N/A	N/A	60	SYNONYMOUS_CODING	LOW	SILENT	gaG/gaA	E280	Cluap1	protein_coding	ENSMUST00000040881	exon_16_3928490_3928631	G/A	0.365591	N/A	N/A	0.61	34	N/A	N/A	61	93	124	115	100	diff	F3872	0.490196	0.744186	0.7	0.363636	51	43	40	22
chr13_17989485_T_C	chr13	17989485	rs253272079;rs51214543;rs227413331	T	C	781.77	N/A	N/A	993.77	PASS	N/A	N/A	PASS	43.01	N/A	N/A	43.56	SYNONYMOUS_CODING	LOW	SILENT	gcA/gcG	A182	Yae1d1	protein_coding	ENSMUST00000099735	exon_13_17986640_17989782	T/C	0.284483	N/A	N/A	0.688889	33	N/A	N/A	31	116	313	105	45	diff	F3872	0.521127	0.34127	0.692308	0.594203	71	126	52	69
chr6_49055667_C_T	chr6	49055667	rs30667356	C	T	602.77	2054.77	N/A	N/A	PASS	PASS	N/A	N/A	60	60	N/A	N/A	SYNONYMOUS_CODING	LOW	SILENT	atC/atT	I508	Gpnmb	protein_coding	ENSMUST00000031840	exon_6_49055621_49055714	C/T	0.469388	0.831169	N/A	N/A	23	64	N/A	N/A	49	77	49	56	diff	F3863	0.333333	0.685714	0	0.25	6	35	10	16
chr13_17989536_T_C	chr13	17989536	rs47386470;rs217448312	T	C	980.77	N/A	N/A	1387.77	PASS	N/A	N/A	PASS	48.64	N/A	N/A	50.93	SYNONYMOUS_CODING	LOW	SILENT	ccA/ccG	P165	Yae1d1	protein_coding	ENSMUST00000099735	exon_13_17986640_17989782	T/C	0.318584	N/A	N/A	0.733333	36	N/A	N/A	44	113	341	105	60	diff	F3872	0.535088	0.3875	0.689189	0.571429	114	240	74	133
chr11_120563849_A_G	chr11	120563849	rs26966826	A	G	264.77	677.77	N/A	N/A	PASS	PASS	N/A	N/A	60	60	N/A	N/A	SYNONYMOUS_CODING	LOW	SILENT	aaT/aaC	N234	P4hb	protein_coding	ENSMUST00000026122	exon_11_120563816_120563920	A/G	0.277778	0.6	N/A	N/A	10	21	N/A	N/A	36	35	42	57	diff	F3863	0.726415	0.728155	0.741935	0.753623	212	206	248	276
chr8_60672082_C_A	chr8	60672082	rs37664490	C	A	743.77	1425.77	1229.77	1429.77	PASS	PASS	PASS	PASS	60	60	60	60	UTR_3_PRIME	MODIFIER	NONE	N/A	N/A	Mfap3l	protein_coding	ENSMUST00000034066	N/A	C/A	0.284211	0.5	0.493333	0.5	27	46	37	44	95	92	75	88	sim	F3863 F3865 F3872	0	0.5	0.625	0.636364	5	6	16	22
chr8_78805819_G_C	chr8	78805819	rs39199322	G	C	1260.77	1787.77	1400.77	1758.77	PASS	PASS	PASS	PASS	60	60	60	60	DOWNSTREAM	MODIFIER	NONE	N/A	N/A	Lsm6	protein_coding	ENSMUST00000051867	N/A	G/C	0.27439	0.487179	0.481481	0.486726	45	57	52	55	164	117	108	113	sim	F3863 F3865 F3872	0.428571	0.2	0.769231	0.578947	21	10	13	19
chr8_78808068_A_G	chr8	78808068	rs36762211	A	G	754.77	1213.77	1411.77	1127.77	PASS	PASS	PASS	PASS	58.63	57.77	55.91	57.82	TRANSCRIPT	MODIFIER	NONE	N/A	N/A	Lsm6	protein_coding	ENSMUST00000126174	N/A	A/G	0.256881	0.486111	0.577465	0.466667	28	35	41	35	109	72	71	75	sim	F3863 F3865 F3872	0	0.288136	0.24	0.275	99	59	50	40
chr8_47093560_T_C	chr8	47093560	rs38715211	T	C	1491.77	2172.77	1827.77	2157.77	PASS	PASS	PASS	PASS	60	60	60	60	TRANSCRIPT	MODIFIER	NONE	N/A	N/A	Enpp6	retained_intron	ENSMUST00000123066	N/A	T/C	0.251185	0.52381	0.47541	0.52	53	66	58	65	211	126	122	125	sim	F3863 F3865 F3872	1	0	0	0	2	0	0	0
chr8_78808053_G_A	chr8	78808053	rs37462586	G	A	840.77	1158.77	1105.77	N/A	PASS	PASS	PASS	N/A	59.17	59.17	58.76	N/A	DOWNSTREAM	MODIFIER	NONE	N/A	N/A	Lsm6	protein_coding	ENSMUST00000146824	N/A	G/A	0.25641	0.492754	0.485294	N/A	30	34	33	N/A	117	69	68	84	sim	F3863 F3865	0.308642	0.352941	0.354167	0.395349	81	51	48	43
chr8_57958316_C_G	chr8	57958316	rs48572859	C	G	220.77	582.77	784.77	N/A	PASS	PASS	PASS	N/A	60	60	60	N/A	INTRAGENIC	MODIFIER	NONE	N/A	N/A	Galntl6	protein_coding	N/A	N/A	C/G	0.22449	0.488889	0.531915	N/A	11	22	25	N/A	49	45	47	43	sim	F3863 F3865	0	0	0	1	1	0	1	6
chr8_116993483_G_A	chr8	116993483	rs253122447	G	A	1544.77	1460.77	665.77	N/A	PASS	PASS	PASS	N/A	60	60	60	N/A	DOWNSTREAM	MODIFIER	NONE	N/A	N/A	Pkd1l2	protein_coding	ENSMUST00000098375	N/A	G/A	0.340782	0.583333	0.617647	N/A	61	49	21	N/A	179	84	34	26	sim	F3863 F3865	0.272727	0.75	0.333333	0.6875	11	12	6	16
chr8_77596050_T_A	chr8	77596050	.	T	A	3781.77	N/A	4833.77	5118.77	PASS	N/A	PASS	PASS	60	N/A	60	60	UTR_3_PRIME	MODIFIER	NONE	N/A	N/A	Tmem184c	protein_coding	ENSMUST00000034030	N/A	T/A	0.354108	N/A	0.582677	0.567376	125	N/A	148	160	353	317	254	282	sim	F3865 F3872	0.230769	0.375	0.25	0	13	8	8	6
chr8_47094056_A_G	chr8	47094056	rs36764207	A	G	621.77	1178.77	906.77	N/A	PASS	PASS	PASS	N/A	60	60	60	N/A	TRANSCRIPT	MODIFIER	NONE	N/A	N/A	Enpp6	retained_intron	ENSMUST00000123066	N/A	A/G	0.23301	0.474359	0.482759	N/A	24	37	28	N/A	103	78	58	74	sim	F3863 F3865	0	1	0	0	0	2	1	0
chr6_38288196_T_A	chr6	38288196	rs236347976	T	A	N/A	N/A	82.73	91.73	N/A	N/A	PASS	PASS	N/A	N/A	60	60	UTR_3_PRIME	MODIFIER	NONE	N/A	N/A	Zc3hav1l	protein_coding	ENSMUST00000058524	N/A	T/A	0	N/A	0.636364	0.6	0	N/A	7	6	18	18	11	10	sim	F3865 F3872	0	0.230769	0	0	11	13	3	12
chr8_84250581_T_C	chr8	84250581	rs32889280	T	C	1450.77	N/A	2494.77	2548.77	PASS	N/A	PASS	PASS	60	N/A	60	60	DOWNSTREAM	MODIFIER	NONE	N/A	N/A	Mri1	protein_coding	ENSMUST00000140850	N/A	T/C	0.260274	N/A	0.59854	0.484277	57	N/A	82	77	219	150	137	159	sim	F3865 F3872	0.2	0.4	0	0.3	10	5	3	10
chr13_3650889_G_T	chr13	3650889	rs29932940	G	T	1576.77	1687.77	N/A	1884.77	PASS	PASS	N/A	PASS	60	60	N/A	60	DOWNSTREAM	MODIFIER	NONE	N/A	N/A	Asb13	protein_coding	ENSMUST00000141147	N/A	G/T	0.511111	0.884615	N/A	0.811111	69	69	N/A	73	135	78	143	90	sim	F3863 F3872	0	1	0.6	0.454545	14	4	10	11
chr6_37332113_T_G	chr6	37332113	rs38126459	T	G	811.77	1633.77	957.77	N/A	PASS	PASS	PASS	N/A	60	60	60	N/A	DOWNSTREAM	MODIFIER	NONE	N/A	N/A	Creb3l2	protein_coding	ENSMUST00000128534	N/A	T/G	0.366197	0.676056	0.659091	N/A	26	48	29	N/A	71	71	44	58	sim	F3863 F3865	0	0.571429	0.5	0.545455	5	7	8	11
chr8_77243939_C_T	chr8	77243939	rs230983100	C	T	912.77	965.77	N/A	1451.77	PASS	PASS	N/A	PASS	60	60	N/A	60	DOWNSTREAM	MODIFIER	NONE	N/A	N/A	Nr3c2	protein_coding	ENSMUST00000034031	N/A	C/T	0.302521	0.516667	N/A	0.607595	36	31	N/A	48	119	60	91	79	sim	F3863 F3872	0	0.5	0	0	5	4	1	1
chr8_47093508_T_C	chr8	47093508	rs262274520	T	C	1980.77	2985.77	2512.77	N/A	PASS	PASS	PASS	N/A	60	60	60	N/A	TRANSCRIPT	MODIFIER	NONE	N/A	N/A	Enpp6	retained_intron	ENSMUST00000123066	N/A	T/C	0.276423	0.517442	0.486667	N/A	68	89	73	N/A	246	172	150	169	sim	F3863 F3865	1	0	0	0	2	0	0	0
chr8_66468778_C_A	chr8	66468778	rs31892133	C	A	426.77	N/A	1020.77	887.77	PASS	N/A	PASS	PASS	60	N/A	60	60	TRANSCRIPT	MODIFIER	NONE	N/A	N/A	42430	processed_transcript	ENSMUST00000152320	N/A	C/A	0.28125	N/A	0.53125	0.555556	18	N/A	34	30	64	44	64	54	sim	F3865 F3872	0	0	0.4	0.588235	2	10	5	17
chr8_79343357_T_C	chr8	79343357	rs243473631	T	C	751.77	N/A	N/A	1349.77	PASS	N/A	N/A	PASS	60	N/A	N/A	60	INTRON	MODIFIER	NONE	N/A	N/A	Smad1	protein_coding	ENSMUST00000066091	N/A	T/C	0.3625	N/A	N/A	0.615385	29	N/A	N/A	40	80	52	54	65	diff	F3872	0	0	0	0.833333	50	52	38	6
chr1_37986360_T_C	chr1	37986360	rs32966677	T	C	669.77	1701.77	N/A	N/A	PASS	PASS	N/A	N/A	60	60	N/A	N/A	DOWNSTREAM	MODIFIER	NONE	N/A	N/A	Txndc9	protein_coding	ENSMUST00000072243	N/A	T/C	0.411765	0.666667	N/A	N/A	21	54	N/A	N/A	51	81	68	79	diff	F3863	0.272727	0.6875	0.421053	0.652174	11	16	38	23
chr2_72937194_G_T	chr2	72937194	.	G	T	N/A	N/A	113.77	N/A	N/A	N/A	PASS	N/A	N/A	N/A	60	N/A	DOWNSTREAM	MODIFIER	NONE	N/A	N/A	Sp3	protein_coding	ENSMUST00000129565	N/A	G/T	0	N/A	0.611111	N/A	0	N/A	11	N/A	21	12	18	15	diff	F3865	0.210526	0.578947	0.285714	0.384615	19	19	14	13
chr1_38177976_T_A	chr1	38177976	.	T	A	1073.77	N/A	N/A	1998.77	PASS	N/A	N/A	PASS	60	N/A	N/A	60	DOWNSTREAM	MODIFIER	NONE	N/A	N/A	Aff3	protein_coding	ENSMUST00000136641	N/A	T/A	0.433735	N/A	N/A	0.638298	36	N/A	N/A	60	83	80	90	94	diff	F3872	0.484848	0.527273	0.464286	0.43662	33	55	56	71
chr13_13826304_C_T	chr13	13826304	.	C	T	1546.77	N/A	N/A	1674.77	PASS	N/A	N/A	PASS	60	N/A	N/A	60	UTR_3_PRIME	MODIFIER	NONE	N/A	N/A	Gng4	processed_transcript	ENSMUST00000021734	N/A	C/T	0.427083	N/A	N/A	0.930233	41	N/A	N/A	40	96	293	69	43	diff	F3872	1	0	0	0	2	4	1	0
chr8_88331348_G_A	chr8	88331348	rs234702280	G	A	820.77	N/A	N/A	1727.77	PASS	N/A	N/A	PASS	60	N/A	N/A	60	DOWNSTREAM	MODIFIER	NONE	N/A	N/A	Adcy7	protein_coding	ENSMUST00000098521	N/A	G/A	0.281553	N/A	N/A	0.619048	29	N/A	N/A	52	103	86	67	84	diff	F3872	0.229167	0.34375	0.560976	0.486486	48	32	41	37
chr8_124369605_T_C	chr8	124369605	rs4227449	T	C	1139.77	N/A	N/A	1331.77	PASS	N/A	N/A	PASS	60	N/A	N/A	60	DOWNSTREAM	MODIFIER	NONE	N/A	N/A	Pgbd5	protein_coding	ENSMUST00000128312	N/A	T/C	0.349515	N/A	N/A	0.575758	36	N/A	N/A	38	103	65	61	66	diff	F3872	0.7	0.466667	0.714286	0.888889	10	15	7	9
chr6_42280932_A_C	chr6	42280932	rs16788872	A	C	1001.77	1972.77	N/A	N/A	PASS	PASS	N/A	N/A	60	60	N/A	N/A	DOWNSTREAM	MODIFIER	NONE	N/A	N/A	Casp2	protein_coding	ENSMUST00000132398	N/A	A/C	0.478873	0.694118	N/A	N/A	34	59	N/A	N/A	71	85	52	55	diff	F3863	0.450704	0.555556	0.581081	0.435294	71	81	74	85
chr2_93642510_C_G	chr2	93642510	.	C	G	N/A	139.73	N/A	N/A	N/A	PASS	N/A	N/A	N/A	60	N/A	N/A	UTR_5_PRIME	MODIFIER	NONE	N/A	N/A	Alx4	protein_coding	ENSMUST00000042078	exon_2_93642384_93643088	C/G	0	0.5	N/A	N/A	0	11	N/A	N/A	25	22	32	17	diff	F3863	0	1	0	0.333333	94	9	100	6
chr6_53816387_A_C	chr6	53816387	rs218212385	A	C	2389.77	6356.77	N/A	N/A	PASS	PASS	N/A	N/A	60	60	N/A	N/A	UPSTREAM	MODIFIER	NONE	N/A	N/A	Gm16499	protein_coding	ENSMUST00000104970	N/A	A/C	0.440476	0.78355	N/A	N/A	74	181	N/A	N/A	168	231	147	156	diff	F3863	0	1	0	0	1	2	2	1
chr8_78806865_G_A	chr8	78806865	rs38193180	G	A	1562.77	N/A	N/A	2319.77	PASS	N/A	N/A	PASS	60	N/A	N/A	60	DOWNSTREAM	MODIFIER	NONE	N/A	N/A	Lsm6	protein_coding	ENSMUST00000126174	N/A	G/A	0.319277	N/A	N/A	0.537313	53	N/A	N/A	72	166	119	96	134	diff	F3872	0	0.467742	0.4375	0.480769	67	62	32	52
chr6_48570195_G_A	chr6	48570195	rs36609702	G	A	1573.77	3997.77	N/A	N/A	PASS	PASS	N/A	N/A	60	60	N/A	N/A	DOWNSTREAM	MODIFIER	NONE	N/A	N/A	Lrrc61	protein_coding	ENSMUST00000146245	N/A	G/A	0.5	0.704142	N/A	N/A	48	119	N/A	N/A	96	169	81	109	diff	F3863	0.636364	0.758065	0.666667	0.571429	11	62	15	21
chr16_33769346_T_G	chr16	33769346	.	T	G	N/A	N/A	346.77	N/A	N/A	N/A	PASS	N/A	N/A	N/A	60.51	N/A	DOWNSTREAM	MODIFIER	NONE	N/A	N/A	Heg1	protein_coding	ENSMUST00000128105	N/A	T/G	0	N/A	0.619048	N/A	0	N/A	13	N/A	17	18	21	15	diff	F3865	0	0	0.615385	0	11	15	26	14
chr6_39462743_G_A	chr6	39462743	rs36733603	G	A	1381.77	3337.77	N/A	N/A	PASS	PASS	N/A	N/A	59.34	58.42	N/A	N/A	DOWNSTREAM	MODIFIER	NONE	N/A	N/A	Dennd2a	protein_coding	ENSMUST00000149162	N/A	G/A	0.372881	0.578313	N/A	N/A	44	96	N/A	N/A	118	166	117	138	diff	F3863	0.386861	0.474576	0.361111	0.317365	137	177	108	167
chr14_73197164_C_G	chr14	73197164	rs246951019	C	G	N/A	N/A	291.77	N/A	N/A	N/A	PASS	N/A	N/A	N/A	60	N/A	INTRON	MODIFIER	NONE	N/A	N/A	Rcbtb2	protein_coding	ENSMUST00000171767	N/A	C/G	0	N/A	0.289474	N/A	0	N/A	11	N/A	36	38	38	40	diff	F3865	0	0	0.5	0	80	100	44	109
chr6_34391980_A_G	chr6	34391980	rs265378216	A	G	2258.77	5571.77	N/A	N/A	PASS	PASS	N/A	N/A	60	60	N/A	N/A	DOWNSTREAM	MODIFIER	NONE	N/A	N/A	Akr1b10	protein_coding	ENSMUST00000144384	N/A	A/G	0.44586	0.65587	N/A	N/A	70	162	N/A	N/A	157	247	156	181	diff	F3863	1	0	0	0	3	22	18	15
chr10_10545758_G_T	chr10	10545758	rs250776315	G	T	849.77	N/A	N/A	1380.77	PASS	N/A	N/A	PASS	60	N/A	N/A	60	UTR_3_PRIME	MODIFIER	NONE	N/A	N/A	Rab32	protein_coding	ENSMUST00000019974	N/A	G/T	0.376623	N/A	N/A	0.597222	29	N/A	N/A	43	77	72	82	72	diff	F3872	0	0.222222	0.461538	0.615385	11	9	13	13
chr17_23736413_C_T	chr17	23736413	rs249387112	C	T	867.77	N/A	1923.77	N/A	PASS	N/A	PASS	N/A	60.63	N/A	61.45	N/A	DOWNSTREAM	MODIFIER	NONE	N/A	N/A	Kremen2	protein_coding	ENSMUST00000046525	N/A	C/T	0.371134	N/A	0.59375	N/A	36	N/A	57	N/A	97	105	96	108	diff	F3865	0.205882	0	0.470588	0	34	100	17	48
chr8_85079869_T_A	chr8	85079869	rs32854979	T	A	580.77	986.77	N/A	N/A	PASS	PASS	N/A	N/A	60	60	N/A	N/A	DOWNSTREAM	MODIFIER	NONE	N/A	N/A	Dhps	protein_coding	ENSMUST00000078665	N/A	T/A	0.302632	0.557692	N/A	N/A	23	29	N/A	N/A	76	52	67	50	diff	F3863	0	0.363636	0.375	0.6875	137	33	32	32
chr13_17897074_T_C	chr13	17897074	rs13474467	T	C	938.77	N/A	N/A	1401.56	PASS	N/A	N/A	PASS	60	N/A	N/A	60	UTR_5_PRIME	MODIFIER	NONE	N/A	N/A	Rala	protein_coding	ENSMUST00000009003	exon_13_17896953_17897102	T/C	0.478873	N/A	N/A	0.916667	34	N/A	N/A	44	71	135	48	48	diff	F3872	0.484848	0.277567	0.596491	0.533333	66	263	57	105
chr6_53816545_T_G	chr6	53816545	rs236840376	T	G	1675.77	5125.77	N/A	N/A	PASS	PASS	N/A	N/A	60	60	N/A	N/A	UPSTREAM	MODIFIER	NONE	N/A	N/A	Gm16499	protein_coding	ENSMUST00000104970	N/A	T/G	0.393701	0.778947	N/A	N/A	50	148	N/A	N/A	127	190	94	124	diff	F3863	0.6	0.666667	0	0.714286	5	9	5	7
chr2_93642488_G_C	chr2	93642488	.	G	C	N/A	148.77	N/A	N/A	N/A	PASS	N/A	N/A	N/A	60	N/A	N/A	UTR_5_PRIME	MODIFIER	NONE	N/A	N/A	Alx4	protein_coding	ENSMUST00000042078	exon_2_93642384_93643088	G/C	0	0.454545	N/A	N/A	0	5	N/A	N/A	18	11	17	10	diff	F3863	0	0.666667	0.266667	0.333333	95	9	15	6
chr2_131026138_G_A	chr2	131026138	rs27259002	G	A	1253.77	N/A	1915.77	N/A	PASS	N/A	PASS	N/A	60	N/A	60	N/A	UTR_3_PRIME	MODIFIER	NONE	N/A	N/A	Atrn	protein_coding	ENSMUST00000028781	N/A	G/A	0.414141	N/A	0.655556	N/A	41	N/A	59	N/A	99	86	90	99	diff	F3865	0.421053	0.444444	0.5	0.470588	19	27	32	34
chr18_61193982_G_A	chr18	61193982	.	G	A	N/A	285.77	N/A	N/A	N/A	PASS	N/A	N/A	N/A	59.11	N/A	N/A	DOWNSTREAM	MODIFIER	NONE	N/A	N/A	Slc26a2	protein_coding	ENSMUST00000037603	N/A	G/A	0	0.541667	N/A	N/A	0	13	N/A	N/A	39	24	35	30	diff	F3863	0	1	0	0	3	2	1	1
chr1_151368376_C_T	chr1	151368376	rs250107720;rs214920857	C	T	N/A	98.77	N/A	N/A	N/A	PASS	N/A	N/A	N/A	60	N/A	N/A	DOWNSTREAM	MODIFIER	NONE	N/A	N/A	Ivns1abp	protein_coding	ENSMUST00000023918	N/A	C/T	0	0.333333	N/A	N/A	0	8	N/A	N/A	35	24	47	47	diff	F3863	1	0.875	0	0	2	8	8	4
chr6_42709968_C_A	chr6	42709968	rs38476792	C	A	84.77	814.77	N/A	N/A	PASS	PASS	N/A	N/A	60	60	N/A	N/A	TRANSCRIPT	MODIFIER	NONE	N/A	N/A	Fam115a	protein_coding	ENSMUST00000151021	N/A	C/A	0.222222	0.774194	N/A	N/A	4	24	N/A	N/A	18	31	21	14	diff	F3863	0.928571	0.945652	1	0.96	42	92	36	50
chr6_142402091_G_T	chr6	142402091	.	G	T	N/A	N/A	N/A	93.77	N/A	N/A	N/A	PASS	N/A	N/A	N/A	60	DOWNSTREAM	MODIFIER	NONE	N/A	N/A	Golt1b	protein_coding	ENSMUST00000146508	N/A	G/T	0	N/A	N/A	0.212121	0	N/A	N/A	7	37	52	54	33	diff	F3872	0.272727	0.30303	0.238095	0	11	33	21	20
chr6_49334042_C_T	chr6	49334042	rs30170580	C	T	554.77	2566.77	N/A	N/A	PASS	PASS	N/A	N/A	60	60	N/A	N/A	UTR_5_PRIME	MODIFIER	NONE	N/A	N/A	Ccdc126	protein_coding	ENSMUST00000055559	exon_6_49333911_49334297	C/T	0.5	0.770833	N/A	N/A	19	74	N/A	N/A	38	96	35	62	diff	F3863	0.333333	0.85	0.7	0.533333	6	20	10	15
chr8_78808122_G_A	chr8	78808122	rs237806813	G	A	903.77	N/A	1319.77	N/A	PASS	N/A	PASS	N/A	57.33	N/A	54.55	N/A	TRANSCRIPT	MODIFIER	NONE	N/A	N/A	Lsm6	protein_coding	ENSMUST00000126174	N/A	G/A	0.324786	N/A	0.586667	N/A	38	N/A	44	N/A	117	83	75	102	diff	F3865	0	0.447059	0.348624	0.337748	236	170	109	151
chr8_77243087_C_T	chr8	77243087	rs215323576	C	T	3480.77	N/A	N/A	4359.77	PASS	N/A	N/A	PASS	60	N/A	N/A	60	DOWNSTREAM	MODIFIER	NONE	N/A	N/A	Nr3c2	protein_coding	ENSMUST00000034031	N/A	C/T	0.358306	N/A	N/A	0.562212	110	N/A	N/A	122	307	267	238	217	diff	F3872	0	0	0.75	0	2	3	4	1
chr9_65903099_G_T	chr9	65903099	.	G	T	N/A	N/A	59.77	N/A	N/A	N/A	PASS	N/A	N/A	N/A	60	N/A	INTRON	MODIFIER	NONE	N/A	N/A	Trip4	protein_coding	ENSMUST00000119245	N/A	G/T	0	N/A	0.30303	N/A	0	N/A	10	N/A	66	58	33	56	diff	F3865	0.26	0.287879	0.413793	0.25	50	66	29	36
chr10_115432626_A_C	chr10	115432626	.	A	C	N/A	N/A	1347.77	N/A	N/A	N/A	PASS	N/A	N/A	N/A	60	N/A	DOWNSTREAM	MODIFIER	NONE	N/A	N/A	Zfc3h1	protein_coding	ENSMUST00000141246	N/A	A/C	0	N/A	0.463918	N/A	0	N/A	45	N/A	100	122	97	84	diff	F3865	0	0	0.560976	0	46	92	41	55
chr6_6877971_A_G	chr6	6877971	rs245770742;rs248200110	A	G	N/A	1268.77	N/A	N/A	N/A	PASS	N/A	N/A	N/A	63.03	N/A	N/A	UTR_3_PRIME	MODIFIER	NONE	N/A	N/A	Dlx5	protein_coding	ENSMUST00000052609	N/A	A/G	0	0.554455	N/A	N/A	0	56	N/A	N/A	108	101	95	87	diff	F3863	0	0	0	0.5	0	2	0	6
chr6_39139954_T_C	chr6	39139954	rs212002055	T	C	2103.77	5019.77	N/A	N/A	PASS	PASS	N/A	N/A	60	59.81	N/A	N/A	DOWNSTREAM	MODIFIER	NONE	N/A	N/A	Jhdm1d	protein_coding	ENSMUST00000127036	N/A	T/C	0.425676	0.648402	N/A	N/A	63	142	N/A	N/A	148	219	144	174	diff	F3863	0.625	0.588235	0.5	0.296296	8	17	32	27
chr8_79071359_G_C	chr8	79071359	rs258851160	G	C	350.77	N/A	N/A	1005.77	PASS	N/A	N/A	PASS	59.23	N/A	N/A	58.59	INTRON	MODIFIER	NONE	N/A	N/A	Zfp827	protein_coding	ENSMUST00000098614	N/A	G/C	0.22449	N/A	N/A	0.658537	11	N/A	N/A	27	49	42	26	41	diff	F3872	0	0	0	0.5	1178	1476	1086	4
chr6_34368328_C_T	chr6	34368328	rs13468961	C	T	898.77	2256.77	N/A	N/A	PASS	PASS	N/A	N/A	60	60	N/A	N/A	DOWNSTREAM	MODIFIER	NONE	N/A	N/A	Akr1b8	protein_coding	ENSMUST00000133370	N/A	C/T	0.37037	0.744186	N/A	N/A	30	64	N/A	N/A	81	86	85	88	diff	F3863	0	0.6	0	0.75	7	25	2	8
chr6_34368262_A_G	chr6	34368262	rs13468960	A	G	866.77	1883.77	N/A	N/A	PASS	PASS	N/A	N/A	60	60	N/A	N/A	DOWNSTREAM	MODIFIER	NONE	N/A	N/A	Akr1b8	protein_coding	ENSMUST00000133370	N/A	A/G	0.388235	0.674419	N/A	N/A	33	58	N/A	N/A	85	86	61	68	diff	F3863	0	0.533333	0.5	0.666667	10	15	4	3
chr11_115348212_T_C	chr11	115348212	rs13459569	T	C	758.77	N/A	901.77	N/A	PASS	N/A	PASS	N/A	60	N/A	60	N/A	DOWNSTREAM	MODIFIER	NONE	N/A	N/A	Hid1	protein_coding	ENSMUST00000146256	N/A	T/C	0.284211	N/A	0.536232	N/A	27	N/A	37	N/A	95	85	69	90	diff	F3865	0.333333	0.375	0.470588	0.325	30	24	51	40
chr6_39601575_G_A	chr6	39601575	rs226890449	G	A	339.77	1116.77	N/A	N/A	PASS	PASS	N/A	N/A	54.35	51.09	N/A	N/A	DOWNSTREAM	MODIFIER	NONE	N/A	N/A	Adck2	protein_coding	ENSMUST00000126621	N/A	G/A	0.375	0.704545	N/A	N/A	12	31	N/A	N/A	32	44	28	42	diff	F3863	0	0.6	0.714286	0	2	5	7	7
chr8_88332182_G_T	chr8	88332182	rs32764808	G	T	3642.77	N/A	N/A	5421.77	PASS	N/A	N/A	PASS	60	N/A	N/A	60	DOWNSTREAM	MODIFIER	NONE	N/A	N/A	Adcy7	protein_coding	ENSMUST00000098521	N/A	G/T	0.309091	N/A	N/A	0.519737	119	N/A	N/A	158	385	406	336	304	diff	F3872	0.222222	0.238095	0.423077	0.419355	36	21	26	31
chr6_53694109_C_T	chr6	53694109	.	C	T	206.77	1579.77	N/A	N/A	PASS	PASS	N/A	N/A	60	60	N/A	N/A	UTR_3_PRIME	MODIFIER	NONE	N/A	N/A	Creb5	protein_coding	ENSMUST00000047450	N/A	C/T	0.388889	0.807018	N/A	N/A	7	46	N/A	N/A	18	57	23	41	diff	F3863	0	0.428571	0.307692	0	1	7	13	13
chr8_75223623_T_C	chr8	75223623	.	T	C	1051.77	1004.77	N/A	N/A	PASS	PASS	N/A	N/A	60	60	N/A	N/A	DOWNSTREAM	MODIFIER	NONE	N/A	N/A	Rasd2	protein_coding	ENSMUST00000132133	N/A	T/C	0.464789	0.744186	N/A	N/A	33	32	N/A	N/A	71	43	44	66	diff	F3863	0	0	1	1	1	3	2	2
chr8_95836209_C_G	chr8	95836209	rs32135478	C	G	1687.77	N/A	N/A	2219.77	PASS	N/A	N/A	PASS	60	N/A	N/A	60	DOWNSTREAM	MODIFIER	NONE	N/A	N/A	Slc38a7	protein_coding	ENSMUST00000142881	N/A	C/G	0.323699	N/A	N/A	0.595238	56	N/A	N/A	75	173	158	120	126	diff	F3872	0.416667	0.344828	0.47619	0.266667	24	29	21	15
chr16_30314069_G_A	chr16	30314069	rs13460615	G	A	1285.77	N/A	N/A	1953.77	PASS	N/A	N/A	PASS	60	N/A	N/A	60	UPSTREAM	MODIFIER	NONE	N/A	N/A	Gp5	protein_coding	ENSMUST00000061190	N/A	G/A	0.613208	N/A	N/A	0.817308	65	N/A	N/A	85	106	140	110	104	diff	F3872	0	0	0.263158	0	24	25	19	11
chr8_40493031_A_T	chr8	40493031	rs232826354;rs258419332;rs13473279	A	T	1181.77	1369.77	N/A	N/A	PASS	PASS	N/A	N/A	60	60	N/A	N/A	DOWNSTREAM	MODIFIER	NONE	N/A	N/A	Cnot7	protein_coding	ENSMUST00000132740	N/A	A/T	0.307018	0.507042	N/A	N/A	35	36	N/A	N/A	114	71	70	65	diff	F3863	0	0	0	0.292683	143	105	67	41
chr13_13825381_A_G	chr13	13825381	rs46170118	A	G	1361.77	N/A	N/A	1547.77	PASS	N/A	N/A	PASS	60	N/A	N/A	60	UTR_3_PRIME	MODIFIER	NONE	N/A	N/A	Gng4	processed_transcript	ENSMUST00000021734	N/A	A/G	0.466667	N/A	N/A	0.956522	42	N/A	N/A	44	90	263	62	46	diff	F3872	0	0	0	0.75	0	0	2	4
chr17_27710265_C_T	chr17	27710265	rs33213451	C	T	824.77	N/A	1464.77	N/A	PASS	N/A	PASS	N/A	60	N/A	60	N/A	DOWNSTREAM	MODIFIER	NONE	N/A	N/A	Pacsin1	protein_coding	ENSMUST00000097360	N/A	C/T	0.465517	N/A	0.709677	N/A	27	N/A	44	N/A	58	71	62	54	diff	F3865	0	0.4	0.684211	0.423077	2	20	19	26
chr2_93642496_C_G	chr2	93642496	rs226658322	C	G	N/A	143.73	N/A	N/A	N/A	PASS	N/A	N/A	N/A	60	N/A	N/A	UTR_5_PRIME	MODIFIER	NONE	N/A	N/A	Alx4	protein_coding	ENSMUST00000042078	exon_2_93642384_93643088	C/G	0	0.5	N/A	N/A	0	11	N/A	N/A	21	22	23	13	diff	F3863	0.666667	1	0.571429	0.333333	3	8	14	6
chr6_42673324_T_C	chr6	42673324	rs216526129	T	C	806.77	1916.77	N/A	N/A	PASS	PASS	N/A	N/A	60	60	N/A	N/A	DOWNSTREAM	MODIFIER	NONE	N/A	N/A	Fam115a	protein_coding	ENSMUST00000152100	N/A	T/C	0.397059	0.712329	N/A	N/A	27	52	N/A	N/A	68	73	43	55	diff	F3863	0.666667	0.636364	0	0.363636	9	11	77	11
chr16_49912860_A_T	chr16	49912860	.	A	T	N/A	N/A	280.77	N/A	N/A	N/A	PASS	N/A	N/A	N/A	59.88	N/A	DOWNSTREAM	MODIFIER	NONE	N/A	N/A	Cd47	protein_coding	ENSMUST00000114496	N/A	A/T	0	N/A	0.309524	N/A	0	N/A	13	N/A	48	53	42	48	diff	F3865	0	0.285714	0	0	2	7	10	9
chr1_172002589_T_A	chr1	172002589	rs220693624;rs32066769;rs256274334	T	A	N/A	129.73	N/A	N/A	N/A	PASS	N/A	N/A	N/A	60	N/A	N/A	DOWNSTREAM	MODIFIER	NONE	N/A	N/A	Vangl2	protein_coding	ENSMUST00000111264	N/A	T/A	0	0.516129	N/A	N/A	0	16	N/A	N/A	31	31	16	33	diff	F3863	0.375	0.333333	0.5	0.4	8	15	14	10
chr2_131993060_G_A	chr2	131993060	rs246623183	G	A	N/A	N/A	109.77	N/A	N/A	N/A	PASS	N/A	N/A	N/A	60	N/A	UTR_3_PRIME	MODIFIER	NONE	N/A	N/A	Rassf2	protein_coding	ENSMUST00000028814	N/A	G/A	0	N/A	0.34375	N/A	0	N/A	11	N/A	34	22	32	44	diff	F3865	0	0	0.333333	0.4	8	13	6	5
chr6_17573324_C_T	chr6	17573324	rs13472832	C	T	1663.77	3089.77	N/A	N/A	PASS	PASS	N/A	N/A	60	60	N/A	N/A	DOWNSTREAM	MODIFIER	NONE	N/A	N/A	Met	protein_coding	ENSMUST00000080469	N/A	C/T	0.449153	0.678832	N/A	N/A	53	93	N/A	N/A	118	137	102	101	diff	F3863	0	0.666667	0	0	0	3	0	0
chr8_95837469_A_T	chr8	95837469	rs32136167	A	T	1311.77	N/A	N/A	2200.77	PASS	N/A	N/A	PASS	60	N/A	N/A	60	DOWNSTREAM	MODIFIER	NONE	N/A	N/A	Slc38a7	protein_coding	ENSMUST00000142881	N/A	A/T	0.279762	N/A	N/A	0.540323	47	N/A	N/A	67	168	141	115	124	diff	F3872	0.222222	0.380952	0.76	0.47619	27	21	25	21
chr5_32736878_G_C	chr5	32736878	rs246750538	G	C	N/A	N/A	N/A	131.77	N/A	N/A	N/A	PASS	N/A	N/A	N/A	55.39	DOWNSTREAM	MODIFIER	NONE	N/A	N/A	Gm20671	protein_coding	ENSMUST00000144673	N/A	G/C	0	N/A	N/A	0.205128	0	N/A	N/A	8	34	36	39	39	diff	F3872	0.71028	0.633028	0.56338	0.59434	107	109	71	106
chr1_180422305_A_G	chr1	180422305	rs32749025	A	G	1006.77	1345.77	N/A	N/A	PASS	PASS	N/A	N/A	60	60	N/A	N/A	UTR_3_PRIME	MODIFIER	NONE	N/A	N/A	Itpkb	protein_coding	ENSMUST00000070181	N/A	A/G	0.3875	0.640625	N/A	N/A	31	41	N/A	N/A	80	64	77	66	diff	F3863	0.692308	0.625	0.625	0.7	13	16	8	30
chr8_123502571_G_A	chr8	123502571	rs248360555	G	A	872.77	N/A	1050.77	N/A	PASS	N/A	PASS	N/A	60	N/A	60	N/A	DOWNSTREAM	MODIFIER	NONE	N/A	N/A	Afg3l1	protein_coding	ENSMUST00000146795	N/A	G/A	0.336957	N/A	0.592593	N/A	31	N/A	32	N/A	92	56	54	58	diff	F3865	0.26087	0.56	0.307692	0.653846	23	25	26	26
chr6_39462758_T_C	chr6	39462758	rs36439737	T	C	1845.77	3288.77	N/A	N/A	PASS	PASS	N/A	N/A	59.17	58.18	N/A	N/A	DOWNSTREAM	MODIFIER	NONE	N/A	N/A	Dennd2a	protein_coding	ENSMUST00000149162	N/A	T/C	0.372881	0.576923	N/A	N/A	44	90	N/A	N/A	118	156	116	129	diff	F3863	0.414286	0.490099	0.393443	0.411429	140	202	122	175
chr13_17882136_C_T	chr13	17882136	rs51821417	C	T	1507.77	N/A	N/A	2071.77	PASS	N/A	N/A	PASS	60	N/A	N/A	60	UTR_3_PRIME	MODIFIER	NONE	N/A	N/A	Rala	protein_coding	ENSMUST00000009003	N/A	C/T	0.357664	N/A	N/A	0.948276	49	N/A	N/A	55	137	284	100	58	diff	F3872	0.469697	0.225352	0.527778	0.416667	66	142	36	48
chr2_71139004_C_T	chr2	71139004	rs226789581	C	T	N/A	435.77	N/A	N/A	N/A	PASS	N/A	N/A	N/A	60	N/A	N/A	UTR_3_PRIME	MODIFIER	NONE	N/A	N/A	Cybrd1	protein_coding	ENSMUST00000028403	N/A	C/T	0	0.551724	N/A	N/A	0	16	N/A	N/A	37	29	49	57	diff	F3863	0	0	0	0.4	2	4	3	5
chr8_79355562_T_C	chr8	79355562	rs38594114	T	C	1387.77	1663.77	N/A	N/A	PASS	PASS	N/A	N/A	60	60	N/A	N/A	INTRON	MODIFIER	NONE	N/A	N/A	Smad1	protein_coding	ENSMUST00000066091	N/A	T/C	0.326241	0.532609	N/A	N/A	46	49	N/A	N/A	141	92	105	106	diff	F3863	0	0	0	0.75	38	45	26	4
chr6_95127293_T_G	chr6	95127293	rs30936204	T	G	3711.77	7582.77	N/A	N/A	PASS	PASS	N/A	N/A	60	60	N/A	N/A	UTR_3_PRIME	MODIFIER	NONE	N/A	N/A	Kbtbd8	processed_transcript	ENSMUST00000032107	N/A	T/G	0.43346	0.637427	N/A	N/A	114	218	N/A	N/A	263	342	265	255	diff	F3863	0	0.733333	0.846154	0.368421	12	15	13	19
chr1_178015160_G_A	chr1	178015160	rs31335655	G	A	4282.77	N/A	2751.77	N/A	PASS	N/A	PASS	N/A	54.1	N/A	50.95	N/A	SYNONYMOUS_CODING	LOW	SILENT	gtG/gtA	V50	Gm16432	protein_coding	ENSMUST00000094273	exon_1_178015128_178015201	G/A	0.542601	N/A	1	N/A	121	N/A	67	N/A	223	110	67	94	diff	F3847	0	0	0	1	2	6	1	2
chr17_28057353_G_A	chr17	28057353	rs13482935	G	A	191.77	N/A	921.77	N/A	PASS	N/A	PASS	N/A	60	N/A	60	N/A	SYNONYMOUS_CODING	LOW	SILENT	cgG/cgA	R1002	Anks1	protein_coding	ENSMUST00000088027	exon_17_28057327_28057464	G/A	0.304348	N/A	0.736842	N/A	7	N/A	28	N/A	23	16	38	41	diff	F3847	0.736842	0.785714	0.868852	0.8	38	28	61	40
chr17_45639667_T_C	chr17	45639667	rs108267978	T	C	516.77	N/A	1695.77	N/A	PASS	N/A	PASS	N/A	60	N/A	60	N/A	SYNONYMOUS_CODING	LOW	SILENT	caA/caG	Q295	Capn11	protein_coding	ENSMUST00000120717	exon_17_45639623_45639708	T/C	0.390244	N/A	0.701493	N/A	16	N/A	47	N/A	41	31	67	79	diff	F3847	0.888889	1	0.75	0	9	2	4	0
chr17_35014678_C_T	chr17	35014678	rs13472121	C	T	314.77	N/A	1159.77	N/A	PASS	N/A	PASS	N/A	60	N/A	60	N/A	SYNONYMOUS_CODING	LOW	SILENT	gcC/gcT	A993	Vars	protein_coding	ENSMUST00000087315	exon_17_35014622_35014777	C/T	0.37037	N/A	0.809524	N/A	10	N/A	34	N/A	27	22	42	48	diff	F3847	0.441718	0.51	0.631068	0.671053	163	100	103	76
chr1_191306997_T_G	chr1	191306997	rs33839907	T	G	440.77	N/A	779.77	N/A	PASS	N/A	PASS	N/A	60	N/A	60	N/A	SYNONYMOUS_CODING	LOW	SILENT	cgA/cgC	R144	Nenf	protein_coding	ENSMUST00000046770	exon_1_191306789_191307089	T/G	0.378378	N/A	1	N/A	14	N/A	19	N/A	37	30	19	32	diff	F3847	0.317365	0.233333	0.875	0.755814	167	120	32	86
chr15_79312986_G_A	chr15	79312986	rs31602325	G	A	N/A	N/A	233.8	N/A	N/A	N/A	PASS	N/A	N/A	N/A	60	N/A	SYNONYMOUS_CODING	LOW	SILENT	ctC/ctT	L129	Pla2g6	protein_coding	ENSMUST00000047816	exon_15_79312948_79313163	G/A	0	N/A	0.875	N/A	0	N/A	7	N/A	7	4	8	5	diff	F3847	0.833333	0.708333	0.555556	0.777778	18	24	18	9
chr1_191328257_A_T	chr1	191328257	rs13472176	A	T	675.77	N/A	926.77	N/A	PASS	N/A	PASS	N/A	60	N/A	60	N/A	SYNONYMOUS_CODING	LOW	SILENT	gtA/gtT	V37	Tmem206	protein_coding	ENSMUST00000027940	exon_1_191328183_191328279	A/T	0.403846	N/A	1	N/A	21	N/A	24	N/A	52	48	24	38	diff	F3847	0.607143	0.428571	0.944444	0.928571	28	21	18	14
chr13_17989590_T_A	chr13	17989590	rs51363477	T	A	477.77	N/A	597.77	N/A	PASS	N/A	PASS	N/A	57.48	N/A	54.7	N/A	SYNONYMOUS_CODING	LOW	SILENT	tcA/tcT	S147	Yae1d1	protein_coding	ENSMUST00000099735	exon_13_17986640_17989782	T/A	0.126531	N/A	0.513514	N/A	31	N/A	19	N/A	245	64	37	81	diff	F3847	0	0.439252	0.638889	0.446602	670	107	108	103
chr1_179043850_G_A	chr1	179043850	rs38793308	G	A	340.77	N/A	259.8	N/A	PASS	N/A	PASS	N/A	60	N/A	60	N/A	SYNONYMOUS_CODING	LOW	SILENT	ccC/ccT	P321	Smyd3	protein_coding	ENSMUST00000128302	exon_1_179043737_179043911	G/A	0.423077	N/A	1	N/A	11	N/A	7	N/A	26	22	7	19	diff	F3847	0.464286	0.4	0.833333	0.5	28	20	12	4
chr17_32151353_G_A	chr17	32151353	.	G	A	392.77	N/A	1434.77	N/A	PASS	N/A	PASS	N/A	60	N/A	60	N/A	SYNONYMOUS_CODING	LOW	SILENT	tgC/tgT	C744	Notch3	protein_coding	ENSMUST00000087723	exon_17_32151286_32151437	G/A	0.351351	N/A	0.677419	N/A	13	N/A	42	N/A	37	31	62	38	diff	F3847	0	0	0	1	0	11	6	3
chr11_43420701_C_T	chr11	43420701	rs3023333	C	T	N/A	151.77	511.77	232.77	N/A	PASS	PASS	PASS	N/A	60	59.6	59.68	DOWNSTREAM	MODIFIER	NONE	N/A	N/A	Pttg1	protein_coding	ENSMUST00000020685	N/A	C/T	0	0.333333	0.5	0.388889	0	6	11	7	19	18	22	18	sim	F3844 F3847 F3852	1	0	1	0	2	73	3	54
chr13_17882136_C_T	chr13	17882136	rs51821417	C	T	661.77	714.77	1541.77	1189.77	PASS	PASS	PASS	PASS	60	60.17	60.19	60	UTR_3_PRIME	MODIFIER	NONE	N/A	N/A	Rala	protein_coding	ENSMUST00000009003	N/A	C/T	0.140969	0.34375	0.719298	0.352381	32	22	41	37	227	64	57	105	sim	F3844 F3847 F3852	0	0.357143	0.64	0.345455	197	14	50	55
chrX_6053825_G_A	chrX	6053825	.	G	A	N/A	N/A	1857.77	1365.77	N/A	N/A	PASS	PASS	N/A	N/A	60	60	UTR_3_PRIME	MODIFIER	NONE	N/A	N/A	Nudt11	protein_coding	ENSMUST00000103007	N/A	G/A	0	N/A	1	0.72549	0	N/A	45	37	42	32	45	51	sim	F3847 F3852	0	0	1	1	16	2	10	11
chr1_180424233_G_T	chr1	180424233	rs216250745	G	T	744.77	N/A	846.77	1268.77	PASS	N/A	PASS	PASS	60	N/A	60	60	UTR_3_PRIME	MODIFIER	NONE	N/A	N/A	Itpkb	protein_coding	ENSMUST00000070181	N/A	G/T	0.5	N/A	1	0.810811	20	N/A	19	30	40	35	19	37	sim	F3847 F3852	0.515152	0.516129	0.857143	0	33	62	7	13
chr1_182131875_G_C	chr1	182131875	rs50543168	G	C	3750.77	N/A	2881.77	3154.77	PASS	N/A	PASS	PASS	59.96	N/A	60	60	UTR_3_PRIME	MODIFIER	NONE	N/A	N/A	Srp9	protein_coding	ENSMUST00000027792	N/A	G/C	0.465217	N/A	0.986486	0.767857	107	N/A	73	86	230	149	74	112	sim	F3847 F3852	0.516667	0.333333	0.923077	0.959184	60	48	26	49
chr1_180801706_T_A	chr1	180801706	rs32435419	T	A	1348.77	N/A	1057.77	1611.77	PASS	N/A	PASS	PASS	60	N/A	60	60	DOWNSTREAM	MODIFIER	NONE	N/A	N/A	H3f3a	protein_coding	ENSMUST00000081026	N/A	T/A	0.494253	N/A	0.966667	0.854545	43	N/A	29	47	87	45	30	55	sim	F3847 F3852	0	0	1	0	3	2	2	0
chr1_180435881_T_C	chr1	180435881	rs253634165	T	C	498.77	N/A	597.96	715.77	PASS	N/A	PASS	PASS	60	N/A	60	60	DOWNSTREAM	MODIFIER	NONE	N/A	N/A	6330403A02Rik	protein_coding	ENSMUST00000179826	N/A	T/C	0.384615	N/A	0.941176	0.76	15	N/A	16	19	39	31	17	25	sim	F3847 F3852	0	1	0	0	0	2	0	0
chrX_42149400_G_A	chrX	42149400	.	G	A	N/A	1020.77	N/A	1113.77	N/A	PASS	N/A	PASS	N/A	53.97	N/A	54.89	UPSTREAM	MODIFIER	NONE	N/A	N/A	Stag2	protein_coding	ENSMUST00000069619	N/A	G/A	0	0.605263	N/A	0.423077	0	23	N/A	22	49	38	54	52	sim	F3844 F3852	1	1	0	0	3	2	3	5
chr1_178322681_C_T	chr1	178322681	rs13470654	C	T	1987.77	N/A	1522.77	1946.77	PASS	N/A	PASS	PASS	60	N/A	60	60	DOWNSTREAM	MODIFIER	NONE	N/A	N/A	Cox20	protein_coding	ENSMUST00000154437	N/A	C/T	0.491071	N/A	1	0.772727	55	N/A	37	51	112	63	37	66	sim	F3847 F3852	0.418033	0.514706	0.857143	0.789474	122	68	7	19
chrX_42149405_G_A	chrX	42149405	.	G	A	N/A	1020.77	N/A	1027.73	N/A	PASS	N/A	PASS	N/A	54.83	N/A	55.6	UPSTREAM	MODIFIER	NONE	N/A	N/A	Stag2	protein_coding	ENSMUST00000069619	N/A	G/A	0	0.454545	N/A	0.333333	0	20	N/A	20	50	44	58	60	sim	F3844 F3852	1	0.666667	0	0	3	3	3	5
chr1_179626841_T_A	chr1	179626841	rs31813731	T	A	5772.77	N/A	4052.77	4877.77	PASS	N/A	PASS	PASS	60	N/A	60	60	UTR_3_PRIME	MODIFIER	NONE	N/A	N/A	Cnst	protein_coding	ENSMUST00000040706	N/A	T/A	0.522796	N/A	0.964912	0.797753	172	N/A	110	142	329	192	114	178	sim	F3847 F3852	0.527778	0.3125	1	1	36	16	5	14
chr1_180424242_G_A	chr1	180424242	rs227771863	G	A	744.77	N/A	846.77	1268.77	PASS	N/A	PASS	PASS	60	N/A	60	60	UTR_3_PRIME	MODIFIER	NONE	N/A	N/A	Itpkb	protein_coding	ENSMUST00000070181	N/A	G/A	0.486486	N/A	1	0.789474	18	N/A	18	30	37	34	18	38	sim	F3847 F3852	0.53125	0.590909	0.857143	0	32	66	7	13
chr15_76711087_T_C	chr15	76711087	rs31757536	T	C	403.77	N/A	670.77	823.77	PASS	N/A	PASS	PASS	60	N/A	60	60	DOWNSTREAM	MODIFIER	NONE	N/A	N/A	Lrrc24	protein_coding	ENSMUST00000049956	N/A	T/C	0.318182	N/A	0.666667	0.609756	14	N/A	20	25	44	31	30	41	sim	F3847 F3852	0.222222	0.4	0.5	0.333333	9	5	4	6
chr4_88719123_G_A	chr4	88719123	rs234486136;rs249880267;rs243808597;rs215615035	G	A	N/A	N/A	240.73	507.73	N/A	N/A	PASS	PASS	N/A	N/A	60	60	UPSTREAM	MODIFIER	NONE	N/A	N/A		protein_coding	ENSMUST00000181601	N/A	G/A	0	N/A	0.27	0.371134	0	N/A	27	36	96	120	100	97	sim	F3847 F3852	0	0	0.3125	0.448276	28	29	32	29
chr1_191575851_C_T	chr1	191575851	rs33841113	C	T	165.77	N/A	361.77	238.8	PASS	N/A	PASS	PASS	60	N/A	60	60	UPSTREAM	MODIFIER	NONE	N/A	N/A	Dtl	protein_coding	ENSMUST00000027933	N/A	C/T	0.352941	N/A	1	1	6	N/A	10	7	17	11	10	7	sim	F3847 F3852	0.484848	0.567568	1	0.857143	66	37	23	14
chr17_24700556_G_A	chr17	24700556	rs108268294	G	A	268.77	N/A	1014.77	987.77	PASS	N/A	PASS	PASS	60	N/A	60	60	DOWNSTREAM	MODIFIER	NONE	N/A	N/A	Noxo1	protein_coding	ENSMUST00000019464	N/A	G/A	0.333333	N/A	0.682927	0.666667	10	N/A	28	30	30	22	41	45	sim	F3847 F3852	0	0	0.5	0.857143	6	1	6	7
chr9_61955288_C_G	chr9	61955288	.	C	G	1238.77	N/A	904.77	2056.77	PASS	N/A	PASS	PASS	60	N/A	60	60	DOWNSTREAM	MODIFIER	NONE	N/A	N/A	Paqr5	processed_transcript	ENSMUST00000113990	N/A	C/G	0.492958	N/A	0.961538	0.888889	35	N/A	25	56	71	29	26	63	sim	F3847 F3852	0	0	1	0	1	0	2	1
chr1_182895306_G_C	chr1	182895306	.	G	C	768.77	N/A	1118.82	847.77	PASS	N/A	PASS	PASS	60	N/A	60	60	DOWNSTREAM	MODIFIER	NONE	N/A	N/A	Susd4	processed_transcript	ENSMUST00000153348	N/A	G/C	0.45283	N/A	0.939394	0.827586	24	N/A	31	24	53	33	33	29	sim	F3847 F3852	0	0.5	1	1	1	4	12	4
chr1_179744980_A_T	chr1	179744980	rs32649512	A	T	8263.77	N/A	10048.8	11613.8	PASS	N/A	PASS	PASS	60	N/A	60	60	DOWNSTREAM	MODIFIER	NONE	N/A	N/A	Ahctf1	protein_coding	ENSMUST00000151734	N/A	A/T	0.482328	N/A	0.959559	0.766265	232	N/A	261	318	481	437	272	415	sim	F3847 F3852	0.333333	0.6	0	0.666667	6	5	1	3
chr1_178198281_A_G	chr1	178198281	rs228979238	A	G	3682.77	N/A	2884.77	3848.77	PASS	N/A	PASS	PASS	60	N/A	60	60	INTRON	MODIFIER	NONE	N/A	N/A	Desi2	protein_coding	ENSMUST00000027783	N/A	A/G	0.463415	N/A	0.986842	0.76087	114	N/A	75	105	246	126	76	138	sim	F3847 F3852	0.666667	0	0	0	3	13	20	10
chr1_191082535_G_A	chr1	191082535	rs31922497	G	A	543.77	N/A	1011.77	1038.77	PASS	N/A	PASS	PASS	60	N/A	60	60	UTR_3_PRIME	MODIFIER	NONE	N/A	N/A	Nsl1	protein_coding	ENSMUST00000078259	N/A	G/A	0.485714	N/A	1	0.833333	17	N/A	25	30	35	36	25	36	sim	F3847 F3852	0.552632	0.5625	1	1	38	16	7	13
chr4_59023876_C_T	chr4	59023876	.	C	T	N/A	N/A	N/A	140.77	N/A	N/A	N/A	PASS	N/A	N/A	N/A	60	DOWNSTREAM	MODIFIER	NONE	N/A	N/A	Dnajc25	protein_coding	ENSMUST00000148366	N/A	C/T	0	N/A	N/A	0.28125	0	N/A	N/A	9	45	34	32	32	diff	F3852	0	0	0.4	1	448	375	5	3
chr2_27016845_G_T	chr2	27016845	rs244549613	G	T	530.77	N/A	846.77	N/A	PASS	N/A	PASS	N/A	60	N/A	60	N/A	DOWNSTREAM	MODIFIER	NONE	N/A	N/A	Slc2a6	protein_coding	ENSMUST00000045702	N/A	G/T	0.36	N/A	0.657143	N/A	18	N/A	23	N/A	50	28	35	57	diff	F3847	0.692308	0.75	0.75	0.857143	13	4	4	7
chr1_180423357_A_G	chr1	180423357	rs245068236	A	G	1358.77	N/A	1378.77	N/A	PASS	N/A	PASS	N/A	60	N/A	60	N/A	UTR_3_PRIME	MODIFIER	NONE	N/A	N/A	Itpkb	protein_coding	ENSMUST00000070181	N/A	A/G	0.506494	N/A	0.972222	N/A	39	N/A	35	N/A	77	45	36	34	diff	F3847	0.375	0.857143	0	0	8	7	1	0
chr1_181168618_C_T	chr1	181168618	rs32758619	C	T	401.77	N/A	393.77	N/A	PASS	N/A	PASS	N/A	60	N/A	60	N/A	DOWNSTREAM	MODIFIER	NONE	N/A	N/A	Cnih4	protein_coding	ENSMUST00000075968	N/A	C/T	0.5	N/A	1	N/A	12	N/A	11	N/A	24	17	11	14	diff	F3847	0.636364	0.5625	1	1	22	16	17	14
chr7_132984190_G_A	chr7	132984190	.	G	A	N/A	598.73	N/A	N/A	N/A	PASS	N/A	N/A	N/A	59.31	N/A	N/A	DOWNSTREAM	MODIFIER	NONE	N/A	N/A	Ctbp2	nonsense_mediated_decay	ENSMUST00000033269	N/A	G/A	0	0.349206	N/A	N/A	0	22	N/A	N/A	123	63	84	106	diff	F3844	0	0	0.428571	0	24	15	7	18
chr8_36569023_G_A	chr8	36569023	rs247638270	G	A	N/A	N/A	N/A	254.77	N/A	N/A	N/A	PASS	N/A	N/A	N/A	58.01	DOWNSTREAM	MODIFIER	NONE	N/A	N/A	Dlc1	protein_coding	ENSMUST00000156312	N/A	G/A	0	N/A	N/A	0.705882	0	N/A	N/A	12	13	4	6	17	diff	F3852	0	0.8	0	0.8	3	5	3	10
chr17_35238119_T_C	chr17	35238119	rs107894721;rs33121269	T	C	782.77	N/A	1737.77	N/A	PASS	N/A	PASS	N/A	60	N/A	60	N/A	DOWNSTREAM	MODIFIER	NONE	N/A	N/A	Atp6v1g2	retained_intron	ENSMUST00000118384	N/A	T/C	0.451613	N/A	0.684932	N/A	28	N/A	50	N/A	62	44	73	91	diff	F3847	0.666667	0.285714	0.823529	0.5625	3	7	17	16
chr1_179745390_T_C	chr1	179745390	rs32650548	T	C	1295.77	N/A	911.77	N/A	PASS	N/A	PASS	N/A	60	N/A	60	N/A	DOWNSTREAM	MODIFIER	NONE	N/A	N/A	Ahctf1	protein_coding	ENSMUST00000151734	N/A	T/C	0.616667	N/A	0.96	N/A	37	N/A	24	N/A	60	37	25	47	diff	F3847	0.529412	0.375	0.9375	0.823529	34	24	16	17
chr1_181168361_G_A	chr1	181168361	rs32757820	G	A	980.77	N/A	514.77	N/A	PASS	N/A	PASS	N/A	60	N/A	60	N/A	DOWNSTREAM	MODIFIER	NONE	N/A	N/A	Cnih4	protein_coding	ENSMUST00000075968	N/A	G/A	0.509091	N/A	1	N/A	28	N/A	13	N/A	55	39	13	29	diff	F3847	0.666667	0.529412	1	0.826087	33	34	17	23
chr17_31114516_T_C	chr17	31114516	.	T	C	N/A	N/A	N/A	150.77	N/A	N/A	N/A	PASS	N/A	N/A	N/A	60	UTR_3_PRIME	MODIFIER	NONE	N/A	N/A	Abcg1	protein_coding	ENSMUST00000024829	N/A	T/C	0	N/A	N/A	0.271429	0	N/A	N/A	19	62	39	81	70	diff	F3852	0.6	0	0	0	5	3	5	6
chr1_106770392_T_C	chr1	106770392	rs50318829	T	C	141.77	417.77	N/A	N/A	PASS	PASS	N/A	N/A	60	60	N/A	N/A	INTRON	MODIFIER	NONE	N/A	N/A	Vps4b	protein_coding	ENSMUST00000112736	N/A	T/C	0.24	0.684211	N/A	N/A	6	13	N/A	N/A	25	19	28	29	diff	F3844	0.571429	0.222222	0.571429	0.25	7	9	14	8
chr7_104862191_C_T	chr7	104862191	.	C	T	N/A	112.77	N/A	N/A	N/A	PASS	N/A	N/A	N/A	41.88	N/A	N/A	UTR_3_PRIME	MODIFIER	NONE	N/A	N/A	Usp17la	protein_coding	ENSMUST00000067695	N/A	C/T	0	0.416667	N/A	N/A	0	5	N/A	N/A	15	12	19	15	diff	F3844	0	0.5	0	0.4	78	6	53	5
chr17_23736413_C_T	chr17	23736413	rs249387112	C	T	646.77	N/A	1330.77	N/A	PASS	N/A	PASS	N/A	60	N/A	60	N/A	DOWNSTREAM	MODIFIER	NONE	N/A	N/A	Kremen2	protein_coding	ENSMUST00000046525	N/A	C/T	0.392157	N/A	0.65	N/A	20	N/A	39	N/A	51	37	60	76	diff	F3847	0	0	0.288136	0	76	60	59	177
chr17_45449136_G_A	chr17	45449136	rs257825510	G	A	918.77	N/A	1959.77	N/A	PASS	N/A	PASS	N/A	60	N/A	60	N/A	UTR_3_PRIME	MODIFIER	NONE	N/A	N/A	Spats1	protein_coding	ENSMUST00000024731	N/A	G/A	0.405405	N/A	0.695122	N/A	30	N/A	57	N/A	74	62	82	81	diff	F3847	0.666667	1	0.727273	1	6	3	11	2
chr17_35026054_C_T	chr17	35026054	rs108112954	C	T	2348.77	N/A	5028.77	N/A	PASS	N/A	PASS	N/A	60	N/A	60	N/A	DOWNSTREAM	MODIFIER	NONE	N/A	N/A	Msh5	processed_transcript	ENSMUST00000007250	N/A	C/T	0.393617	N/A	0.658986	N/A	74	N/A	143	N/A	188	163	217	271	diff	F3847	1	1	0	0.75	3	3	1	4
chr7_142081488_G_T	chr7	142081488	rs229662604	G	T	N/A	67.77	N/A	N/A	N/A	PASS	N/A	N/A	N/A	60	N/A	N/A	DOWNSTREAM	MODIFIER	NONE	N/A	N/A	Dusp8	protein_coding	ENSMUST00000143661	N/A	G/T	0	0.230769	N/A	N/A	0	6	N/A	N/A	47	26	31	46	diff	F3844	0.285714	0	0.416667	0	14	2	12	13
chr1_181168190_G_A	chr1	181168190	rs32757814	G	A	986.77	N/A	876.53	N/A	PASS	N/A	PASS	N/A	60	N/A	60	N/A	DOWNSTREAM	MODIFIER	NONE	N/A	N/A	Cnih4	protein_coding	ENSMUST00000075968	N/A	G/A	0.47541	N/A	0.92	N/A	29	N/A	23	N/A	61	51	25	46	diff	F3847	0.645161	0.542857	1	0.878788	31	35	15	33
chr1_191306816_C_T	chr1	191306816	rs33839909	C	T	407.77	N/A	545.77	N/A	PASS	N/A	PASS	N/A	60	N/A	60	N/A	UTR_3_PRIME	MODIFIER	NONE	N/A	N/A	Nenf	protein_coding	ENSMUST00000046770	N/A	C/T	0.433333	N/A	1	N/A	13	N/A	15	N/A	30	24	15	26	diff	F3847	0.304348	0	0.875	0.6875	23	15	8	16
chr1_23369743_A_T	chr1	23369743	.	A	T	N/A	N/A	195.77	N/A	N/A	N/A	PASS	N/A	N/A	N/A	60	N/A	UTR_3_PRIME	MODIFIER	NONE	N/A	N/A	Ogfrl1	protein_coding	ENSMUST00000027343	N/A	A/T	0	N/A	0.25641	N/A	0	N/A	10	N/A	45	24	39	47	diff	F3847	0	0	0	0.333333	8	2	1	9
chr1_181093803_A_G	chr1	181093803	rs32751221	A	G	482.77	N/A	290.78	N/A	PASS	N/A	PASS	N/A	60	N/A	60	N/A	UTR_3_PRIME	MODIFIER	NONE	N/A	N/A	Nvl	protein_coding	ENSMUST00000027797	N/A	A/G	0.472222	N/A	1	N/A	17	N/A	8	N/A	36	23	8	25	diff	F3847	0.5	0.290323	1	1	40	31	16	14
chr7_132984200_G_A	chr7	132984200	.	G	A	N/A	N/A	607.77	N/A	N/A	N/A	PASS	N/A	N/A	N/A	58.82	N/A	DOWNSTREAM	MODIFIER	NONE	N/A	N/A	Ctbp2	nonsense_mediated_decay	ENSMUST00000033269	N/A	G/A	0	N/A	0.20202	N/A	0	N/A	20	N/A	146	83	99	135	diff	F3847	0	0	0.272727	0.666667	32	20	11	9
chr16_14474968_T_C	chr16	14474968	rs4164280	T	C	N/A	N/A	N/A	900.77	N/A	N/A	N/A	PASS	N/A	N/A	N/A	60	DOWNSTREAM	MODIFIER	NONE	N/A	N/A	Abcc1	nonsense_mediated_decay	ENSMUST00000130671	N/A	T/C	0	N/A	N/A	0.20625	0	N/A	N/A	33	233	148	205	160	diff	F3852	0	0	0	1	2	0	1	2
chr12_112181324_C_A	chr12	112181324	rs228892783	C	A	N/A	158.77	N/A	N/A	N/A	PASS	N/A	N/A	N/A	60	N/A	N/A	UTR_3_PRIME	MODIFIER	NONE	N/A	N/A	Kif26a	protein_coding	ENSMUST00000128402	N/A	C/A	0	0.357143	N/A	N/A	0	15	N/A	N/A	64	42	60	63	diff	F3844	0	0	0	0.375	0	3	1	8
chr17_5343793_G_A	chr17	5343793	rs51912657	G	A	1654.77	N/A	3274.77	N/A	PASS	N/A	PASS	N/A	60	N/A	60	N/A	DOWNSTREAM	MODIFIER	NONE	N/A	N/A	Arid1b	processed_transcript	ENSMUST00000092723	N/A	G/A	0.477876	N/A	0.682119	N/A	54	N/A	103	N/A	113	83	151	141	diff	F3847	0.617647	0.633333	0.731707	0.8	34	30	41	30
chr18_69684362_G_A	chr18	69684362	.	G	A	N/A	N/A	186.77	N/A	N/A	N/A	PASS	N/A	N/A	N/A	58.99	N/A	DOWNSTREAM	MODIFIER	NONE	N/A	N/A	Tcf4	protein_coding	ENSMUST00000066717	N/A	G/A	0	N/A	0.27907	N/A	0	N/A	12	N/A	45	34	43	52	diff	F3847	0.366071	0	0.466667	0.366071	112	47	75	112
chr17_34593546_C_A	chr17	34593546	.	C	A	649.77	N/A	1263.77	N/A	PASS	N/A	PASS	N/A	60	N/A	60	N/A	DOWNSTREAM	MODIFIER	NONE	N/A	N/A	Gpsm3	protein_coding	ENSMUST00000038244	N/A	C/A	0.428571	N/A	0.692308	N/A	21	N/A	36	N/A	49	22	52	65	diff	F3847	0	0	0.75	0	67	29	4	46
chr5_23963665_C_T	chr5	23963665	rs32048901	C	T	534.77	N/A	1071.77	N/A	PASS	N/A	PASS	N/A	60	N/A	60	N/A	DOWNSTREAM	MODIFIER	NONE	N/A	N/A	Fam126a	processed_transcript	ENSMUST00000115109	N/A	C/T	0.339286	N/A	0.673913	N/A	19	N/A	31	N/A	56	30	46	40	diff	F3847	0.576923	0.461538	0.433333	0	26	13	30	27
chr1_178321887_C_G	chr1	178321887	rs264659755	C	G	1261.77	N/A	1677.77	N/A	PASS	N/A	PASS	N/A	60	N/A	60	N/A	DOWNSTREAM	MODIFIER	NONE	N/A	N/A	Hnrnpu	nonsense_mediated_decay	ENSMUST00000161769	N/A	C/G	0.5625	N/A	0.97619	N/A	36	N/A	41	N/A	64	42	42	50	diff	F3847	0	0.240506	0.236842	0.572917	394	158	38	96
chr1_181167969_A_G	chr1	181167969	rs32756022	A	G	814.77	N/A	622.77	N/A	PASS	N/A	PASS	N/A	60	N/A	60	N/A	DOWNSTREAM	MODIFIER	NONE	N/A	N/A	Cnih4	protein_coding	ENSMUST00000075968	N/A	A/G	0.560976	N/A	1	N/A	23	N/A	16	N/A	41	36	16	40	diff	F3847	0.612903	0.625	1	1	31	16	34	16
chr4_21875275_A_T	chr4	21875275	.	A	T	N/A	N/A	N/A	2899.77	N/A	N/A	N/A	PASS	N/A	N/A	N/A	60	DOWNSTREAM	MODIFIER	NONE	N/A	N/A	Sfrs18	protein_coding	ENSMUST00000108229	N/A	A/T	0	N/A	N/A	0.287926	0	N/A	N/A	93	387	258	265	323	diff	F3852	0	0	0	0.274194	53	31	42	62
chr16_56017065_G_A	chr16	56017065	.	G	A	N/A	N/A	N/A	181.77	N/A	N/A	N/A	PASS	N/A	N/A	N/A	39.3	DOWNSTREAM	MODIFIER	NONE	N/A	N/A	Pcnp	protein_coding	ENSMUST00000096021	N/A	G/A	0	N/A	N/A	0.416667	0	N/A	N/A	20	121	58	99	48	diff	F3852	0.357143	0.333333	0.344262	0.333333	56	48	61	48
chr17_51812402_A_G	chr17	51812402	rs108664905	A	G	1261.77	N/A	2398.77	N/A	PASS	N/A	PASS	N/A	60	N/A	60	N/A	INTRON	MODIFIER	NONE	N/A	N/A	Satb1	protein_coding	ENSMUST00000024720	N/A	A/G	0.5	N/A	0.704082	N/A	38	N/A	69	N/A	76	63	98	107	diff	F3847	0.5	0.714286	0.541667	0.714286	12	7	24	14
chr11_102162670_G_A	chr11	102162670	.	G	A	N/A	N/A	303.77	N/A	N/A	N/A	PASS	N/A	N/A	N/A	60	N/A	DOWNSTREAM	MODIFIER	NONE	N/A	N/A	Lsm12	protein_coding	ENSMUST00000137930	N/A	G/A	0	N/A	0.52381	N/A	0	N/A	11	N/A	27	22	21	31	diff	F3847	0.666667	0.615385	0.428571	0.5	15	13	14	10
chr17_51738419_C_T	chr17	51738419	rs47976538	C	T	926.77	N/A	1666.77	N/A	PASS	N/A	PASS	N/A	60	N/A	60	N/A	DOWNSTREAM	MODIFIER	NONE	N/A	N/A	Satb1	protein_coding	ENSMUST00000024720	N/A	C/T	0.464286	N/A	0.741935	N/A	26	N/A	46	N/A	56	41	62	73	diff	F3847	0.454545	0	0.6	0.652174	11	2	35	23
chr13_17897074_T_C	chr13	17897074	rs13474467	T	C	448.77	N/A	615.77	N/A	PASS	N/A	PASS	N/A	60	N/A	60	N/A	UTR_5_PRIME	MODIFIER	NONE	N/A	N/A	Rala	protein_coding	ENSMUST00000009003	exon_13_17896953_17897102	T/C	0.171171	N/A	0.692308	N/A	19	N/A	18	N/A	111	22	26	35	diff	F3847	0	0.322581	0.559524	0.430556	565	62	84	72
chr4_4763464_C_T	chr4	4763464	rs223635955;rs250028419	C	T	N/A	N/A	157.77	N/A	N/A	N/A	PASS	N/A	N/A	N/A	60	N/A	UTR_3_PRIME	MODIFIER	NONE	N/A	N/A	Impad1	protein_coding	ENSMUST00000084949	N/A	C/T	0	N/A	0.333333	N/A	0	N/A	16	N/A	63	38	48	55	diff	F3847	0.227273	0	0.214286	0.277778	22	18	28	18
chr17_49993343_G_T	chr17	49993343	rs29613068	G	T	755.77	N/A	1886.77	N/A	PASS	N/A	PASS	N/A	60	N/A	60	N/A	UTR_3_PRIME	MODIFIER	NONE	N/A	N/A	Rftn1	protein_coding	ENSMUST00000044503	N/A	G/T	0.372881	N/A	0.627907	N/A	22	N/A	54	N/A	59	46	86	80	diff	F3847	0.492063	0.542857	0.722222	0.5	63	70	18	40
chr17_44083610_G_A	chr17	44083610	rs47085385	G	A	782.77	N/A	1696.77	N/A	PASS	N/A	PASS	N/A	60	N/A	60	N/A	INTRON	MODIFIER	NONE	N/A	N/A	Enpp5	protein_coding	ENSMUST00000024756	N/A	G/A	0.45098	N/A	0.701493	N/A	23	N/A	47	N/A	51	35	67	90	diff	F3847	0	0.666667	0.666667	0	7	3	3	15
chr15_99038010_C_T	chr15	99038010	rs50392322	C	T	447.77	N/A	871.77	N/A	PASS	N/A	PASS	N/A	56.22	N/A	51.07	N/A	UTR_3_PRIME	MODIFIER	NONE	N/A	N/A	Tuba1c	protein_coding	ENSMUST00000058914	N/A	C/T	0.261538	N/A	0.553191	N/A	17	N/A	26	N/A	65	40	47	67	diff	F3847	0.333333	0.292683	0.465116	0.491228	147	41	43	57
chr11_52246538_C_T	chr11	52246538	rs218084921;rs243515672	C	T	N/A	197.73	N/A	N/A	N/A	PASS	N/A	N/A	N/A	60	N/A	N/A	DOWNSTREAM	MODIFIER	NONE	N/A	N/A	Skp1a	nonsense_mediated_decay	ENSMUST00000116595	N/A	C/T	0	0.397059	N/A	N/A	0	27	N/A	N/A	125	68	94	143	diff	F3844	0.392857	0.396396	0.3875	0.443983	420	222	240	241
chr4_138206484_G_A	chr4	138206484	.	G	A	N/A	N/A	N/A	157.77	N/A	N/A	N/A	PASS	N/A	N/A	N/A	59.62	DOWNSTREAM	MODIFIER	NONE	N/A	N/A	Eif4g3	protein_coding	ENSMUST00000148074	N/A	G/A	0	N/A	N/A	0.223529	0	N/A	N/A	19	161	123	104	85	diff	F3852	0.470588	0	0	0	17	16	2	10
chr1_191306837_C_T	chr1	191306837	rs33839908	C	T	434.77	N/A	569.77	N/A	PASS	N/A	PASS	N/A	60	N/A	60	N/A	UTR_3_PRIME	MODIFIER	NONE	N/A	N/A	Nenf	protein_coding	ENSMUST00000046770	N/A	C/T	0.368421	N/A	1	N/A	14	N/A	16	N/A	38	30	16	26	diff	F3847	0.242424	0	0.888889	0.65	33	29	9	20
chr10_81530600_G_T	chr10	81530600	.	G	T	N/A	92.77	N/A	N/A	N/A	PASS	N/A	N/A	N/A	60.33	N/A	N/A	DOWNSTREAM	MODIFIER	NONE	N/A	N/A	Gna11	protein_coding	ENSMUST00000134354	N/A	G/T	0	0.212121	N/A	N/A	0	7	N/A	N/A	53	33	48	68	diff	F3844	0.717391	0	0.75	0.567568	46	21	16	37
chr1_179626288_T_C	chr1	179626288	rs31982496	T	C	1077.77	N/A	944.77	N/A	PASS	N/A	PASS	N/A	60	N/A	60	N/A	UTR_3_PRIME	MODIFIER	NONE	N/A	N/A	Cnst	protein_coding	ENSMUST00000040706	N/A	T/C	0.52459	N/A	1	N/A	32	N/A	23	N/A	61	39	23	37	diff	F3847	0.52381	0.307692	1	1	42	13	7	18
chr17_44604806_G_A	chr17	44604806	rs229083993	G	A	738.77	N/A	1771.77	N/A	PASS	N/A	PASS	N/A	60	N/A	60	N/A	DOWNSTREAM	MODIFIER	NONE	N/A	N/A	Runx2	nonsense_mediated_decay	ENSMUST00000113568	N/A	G/A	0.44898	N/A	0.695652	N/A	22	N/A	48	N/A	49	24	69	53	diff	F3847	0	0.666667	0	0	0	3	4	7
chr17_40923458_G_A	chr17	40923458	.	G	A	1072.77	N/A	2141.77	N/A	PASS	N/A	PASS	N/A	60	N/A	60	N/A	DOWNSTREAM	MODIFIER	NONE	N/A	N/A	Cenpq	protein_coding	ENSMUST00000130890	N/A	G/A	0.426667	N/A	0.659091	N/A	32	N/A	58	N/A	75	39	88	64	diff	F3847	0.492308	0.384615	0.6	0.71875	65	26	55	32
chr17_27580441_A_G	chr17	27580441	rs225784395;rs229209019;rs29520140	A	G	N/A	N/A	64.73	N/A	N/A	N/A	PASS	N/A	N/A	N/A	60	N/A	DOWNSTREAM	MODIFIER	NONE	N/A	N/A	Nudt3	protein_coding	ENSMUST00000062397	N/A	A/G	0	N/A	0.648649	N/A	0	N/A	24	N/A	27	19	37	34	diff	F3847	0.29703	0	0.344444	0.369863	101	34	90	73
chr17_35238037_A_T	chr17	35238037	rs108071304;rs254920651;rs33056240	A	T	855.77	N/A	1789.77	N/A	PASS	N/A	PASS	N/A	60	N/A	60	N/A	DOWNSTREAM	MODIFIER	NONE	N/A	N/A	Atp6v1g2	retained_intron	ENSMUST00000118384	N/A	A/T	0.41791	N/A	0.722222	N/A	28	N/A	52	N/A	67	44	72	95	diff	F3847	0.666667	0.875	0.75	0.6	6	8	12	10
chr1_180422305_A_G	chr1	180422305	rs32749025	A	G	1276.77	N/A	1405.77	N/A	PASS	N/A	PASS	N/A	60	N/A	60	N/A	UTR_3_PRIME	MODIFIER	NONE	N/A	N/A	Itpkb	protein_coding	ENSMUST00000070181	N/A	A/G	0.513158	N/A	0.948718	N/A	39	N/A	37	N/A	76	41	39	42	diff	F3847	0.428571	0.46	1	0	21	50	10	4
chr1_153744770_C_T	chr1	153744770	rs31285118	C	T	1503.77	N/A	1829.77	N/A	PASS	N/A	PASS	N/A	60.08	N/A	60	N/A	UPSTREAM	MODIFIER	NONE	N/A	N/A	Rnasel	protein_coding	ENSMUST00000086209	N/A	C/T	0.358779	N/A	0.586957	N/A	47	N/A	54	N/A	131	80	92	122	diff	F3847	0	0	0.333333	0	1	34	12	14
chr16_94694214_G_T	chr16	94694214	.	G	T	N/A	262.77	N/A	N/A	N/A	PASS	N/A	N/A	N/A	60	N/A	N/A	DOWNSTREAM	MODIFIER	NONE	N/A	N/A	Dyrk1a	protein_coding	ENSMUST00000122284	N/A	G/T	0	0.342105	N/A	N/A	0	13	N/A	N/A	37	38	22	26	diff	F3844	0.272727	0	0	0.363636	11	9	9	11
chr1_93507880_C_T	chr1	93507880	.	C	T	N/A	N/A	931.77	N/A	N/A	N/A	PASS	N/A	N/A	N/A	60	N/A	DOWNSTREAM	MODIFIER	NONE	N/A	N/A	42615	protein_coding	ENSMUST00000152476	N/A	C/T	0	N/A	0.546667	N/A	0	N/A	41	N/A	102	74	75	92	diff	F3847	0.351852	0.363636	0.37037	0.380952	54	33	54	21
chr1_191350146_C_T	chr1	191350146	rs33840808;rs33840807	C	T	1971.77	N/A	1468.77	N/A	PASS	N/A	PASS	N/A	60	N/A	60	N/A	DOWNSTREAM	MODIFIER	NONE	N/A	N/A	Ppp2r5a	protein_coding	ENSMUST00000067976	N/A	C/T	0.563107	N/A	1	N/A	58	N/A	37	N/A	103	52	37	55	diff	F3847	0.45	0.466667	0.882353	0.954545	40	30	17	22
chr17_35039373_T_G	chr17	35039373	rs108586330;rs33151903	T	G	319.77	N/A	1139.77	N/A	PASS	N/A	PASS	N/A	60	N/A	60	N/A	DOWNSTREAM	MODIFIER	NONE	N/A	N/A	Msh5	processed_transcript	ENSMUST00000172491	N/A	T/G	0.297297	N/A	0.695652	N/A	11	N/A	32	N/A	37	24	46	52	diff	F3847	0	1	0	0	21	2	7	3
chr8_70094816_A_G	chr8	70094816	rs212302696	A	G	N/A	N/A	108.77	N/A	N/A	N/A	PASS	N/A	N/A	N/A	56.57	N/A	DOWNSTREAM	MODIFIER	NONE	N/A	N/A	Hapln4	protein_coding	ENSMUST00000007738	N/A	A/G	0	N/A	1	N/A	0	N/A	5	N/A	4	0	5	4	diff	F3847	0.6	0.25	0.444444	0	5	8	9	1082
chr17_24685617_C_T	chr17	24685617	.	C	T	319.77	N/A	1105.77	N/A	PASS	N/A	PASS	N/A	60	N/A	60	N/A	DOWNSTREAM	MODIFIER	NONE	N/A	N/A	Syngr3	protein_coding	ENSMUST00000130936	N/A	C/T	0.37931	N/A	0.74	N/A	11	N/A	37	N/A	29	29	50	53	diff	F3847	0.535714	0.52381	0.622642	0.641026	28	21	53	39
chr1_180424531_A_G	chr1	180424531	rs13465654	A	G	692.77	N/A	724.77	N/A	PASS	N/A	PASS	N/A	60	N/A	60	N/A	UTR_3_PRIME	MODIFIER	NONE	N/A	N/A	Itpkb	protein_coding	ENSMUST00000070181	N/A	A/G	0.423077	N/A	1	N/A	22	N/A	18	N/A	52	39	18	40	diff	F3847	0.485714	0.479452	1	0	35	73	8	10
chr18_69684370_G_A	chr18	69684370	.	G	A	N/A	N/A	186.77	N/A	N/A	N/A	PASS	N/A	N/A	N/A	59.13	N/A	DOWNSTREAM	MODIFIER	NONE	N/A	N/A	Tcf4	protein_coding	ENSMUST00000066717	N/A	G/A	0	N/A	0.2	N/A	0	N/A	10	N/A	47	39	50	60	diff	F3847	0.307692	0	0.352113	0.333333	104	45	71	105
chr17_28060305_C_T	chr17	28060305	rs33089713	C	T	310.77	N/A	N/A	818.77	PASS	N/A	N/A	PASS	60	N/A	N/A	60	INTRON	MODIFIER	NONE	N/A	N/A	Anks1	protein_coding	ENSMUST00000114842	N/A	C/T	0.392857	N/A	N/A	0.785714	11	N/A	N/A	22	28	26	58	28	diff	F3852	0.333333	0.285714	0.6	0.571429	9	7	15	21
