# Supplementary material for: Cancer Stem Cells, not Bulk Tumor Cells, Determine Mechanisms of Resistance to SMO Inhibitors
Source: Cancer Res Commun. 2022 Jun 6;2(6):402–16. doi: 10.1158/2767-9764.CRC-22-0124 (PMC9853917; doi:10.1158/2767-9764.CRC-22-0124)
Supplement: Supplementary Table 5 — mutational profiles for Fsmo;GFAP-cre SD-CSC tumors [file crc-22-0124-s04.xlsx]

## Sheet: Sheet1
Supplementary Table 5 :Mutation profile of FSmo;GFAPcre tumors
CHROM	POS	ID	REF	ALT	C_FILTER	SNPEFF_EFFECT	SNPEFF_IMPACT	SNPEFF_FUNCTIONAL_CLASS	SNPEFF_CODON_CHANGE	SNPEFF_AMINO_ACID_CHANGE	SNPEFF_GENE_NAME	SNPEFF_GENE_BIOTYPE	SNPEFF_TRANSCRIPT_ID	SNPEFF_EXON_ID	SIM_DIFF	SOURCE	HGVS.c	HGVS.p	GT_Yun.LPD.1_L3	GT_Yun.LPD.11_L3	GT_Yun.LPD.12_L3	GT_Yun.LPD.14_L4	GT_Yun.LPD.15_L4	GT_Yun.LPD.3_L3	GT_Yun.LPD.4_L3	GT_Yun.LPD.5_L3L4	GT_Yun.LPD.6_L3L4	GT_Yun.LPD.7_L3L4	GT_Yun.LPD.8_L3L4
chr10	41926794		TCTCA	T	PASS	retained_intron	HIGH	splice_donor_variant&splice_region_variant&intron_variant			Armc2	retained_intron	ENSMUST00000105503.8				n.2436+2_2436+5delTGAG		-	-	-	-	-	-	0/1	-	-	-	-
chr11	58317471		GCCATA	G	PASS	protein_coding	HIGH	frameshift_variant			Zfp672	protein_coding	ENSMUST00000057836.11				c.18_22delTATGG	p.Met7fs	-	-	-	-	0/1	-	-	-	-	-	-
chr12	83778805		C	A	PASS	protein_coding	HIGH	stop_gained			Papln	protein_coding	ENSMUST00000121733.7				c.1859C>A	p.Ser620*	-	-	-	-	-	0/1	-	-	-	-	-
chr12	88027394		T	TTTGATGATATTGGAGATGATGATGAAGATATTGATGATATATAACCTAATCTAAGCATTCTATG	PASS	protein_coding	HIGH	frameshift_variant&stop_gained			Gm2056	protein_coding	ENSMUST00000178852.1				c.419_420insTATTGATGATATATAACCTAATCTAAGCATTCTATGTTGATGATATTGGAGATGATGATGAAGA	p.Ile141fs	-	-	-	0/1	-	-	-	-	-	-	-
chr12	111542312		T	A	PASS	protein_coding	HIGH	splice_donor_variant&intron_variant			Eif5	protein_coding	ENSMUST00000050993.9				c.738+2T>A		-	-	-	-	-	-	-	-	-	0/1	-
chr13	30815391		C	CTTTTTGTCCGCACCACTTGCAAGCTGAGGCAGGGCCTCCAGGGCCTGTTTAAAACTAGACCTGCTTTCCGAGGT	PASS	protein_coding	HIGH	splice_acceptor_variant&intron_variant			Exoc2	protein_coding	ENSMUST00000021785.6				c.2682-1_2682insACCTCGGAAAGCAGGTCTAGTTTTAAACAGGCCCTGGAGGCCCTGCCTCAGCTTGCAAGTGGTGCGGACAAAAA		-	-	-	-	-	-	-	0/1	-	-	-
chr18	25115810		C	T	PASS	protein_coding	HIGH	stop_gained			Fhod3	protein_coding	ENSMUST00000037097.7				c.4045C>T	p.Gln1349*	-	-	-	-	-	-	-	0/1	-	-	-
chr18	37505583		TGA	T	PASS	protein_coding	HIGH	frameshift_variant			Pcdhb20	protein_coding	ENSMUST00000052179.7				c.1162_1163delGA	p.Asp388fs	-	-	-	-	-	-	0/1	-	-	-	-
chr2	119613011		C	G	PASS	protein_coding	HIGH	splice_donor_variant&intron_variant			Oip5	protein_coding	ENSMUST00000123818.1				c.576+1G>C		-	-	-	-	-	-	-	-	0/1	-	-
chr3	37714907		GGTTGA	G	PASS	protein_coding	HIGH	frameshift_variant			Gm5148	protein_coding	ENSMUST00000079755.4				c.158_162delTCAAC	p.Leu53fs	-	0/1	-	-	-	-	-	-	-	-	-
chr4	14818489		C	CCGTCTCTTT	PASS	protein_coding	HIGH	splice_acceptor_variant&intron_variant			Otud6b	protein_coding	ENSMUST00000117268.7				c.412-2_412-1insAAAGAGACG	-	0/1	-	-	-	-	-	-	-	-	-	-
chr5	11684707		A	T	PASS	protein_coding	HIGH	stop_gained			Gm8922	protein_coding	ENSMUST00000170057.7				c.337A>T	p.Arg113*	-	-	-	-	-	-	-	-	-	-	0/1
chr5	137613002		TC	T	PASS	protein_coding	HIGH	frameshift_variant			Fbxo24	protein_coding	ENSMUST00000031732.13				c.1524delG	p.Ser509fs	-	-	-	-	-	-	-	-	-	0/1	-
chr6	124908567		CCCCA	C	PASS	protein_coding	HIGH	frameshift_variant			Lag3	protein_coding	ENSMUST00000032217.1				c.845_848delTGGG	p.Val282fs	-	-	-	-	-	-	-	-	0/1	-	-
chr7	7916398		C	A	PASS	unprocessed_pseudogene	HIGH	splice_donor_variant&intron_variant			Gm7230	unprocessed_pseudogene	ENSMUST00000173026.1				n.319+1G>T		-	-	-	-	-	-	-	-	-	0/1	-
chrX	56980176		AT	A	PASS	protein_coding	HIGH	frameshift_variant			Adgrg4	protein_coding	ENSMUST00000096431.9				c.559delT	p.Ser187fs	-	-	-	-	-	-	-	0/1	-	-	-
chrX	73194308		T	G	PASS	protein_coding	HIGH	splice_donor_variant&intron_variant			Xlr3b	protein_coding	ENSMUST00000101486.4				c.106+2T>G		-	-	-	-	-	-	-	0/1	-	-	-
chrX	76161764		C	T	PASS	unprocessed_pseudogene	HIGH	splice_acceptor_variant&intron_variant			Gm14710	unprocessed_pseudogene	ENSMUST00000146082.1				n.132-1G>A		-	-	-	-	-	-	-	0/1	-	-	-
chrX	79624666		GGT	G	PASS	protein_coding	HIGH	frameshift_variant			Mageb16	protein_coding	ENSMUST00000052283.6				c.111_112delAC	p.Pro38fs	-	-	-	-	-	-	-	0/1	-	-	-
