# Supplementary material for: Cancer Stem Cells, not Bulk Tumor Cells, Determine Mechanisms of Resistance to SMO Inhibitors
Source: Cancer Res Commun. 2022 Jun 6;2(6):402–16. doi: 10.1158/2767-9764.CRC-22-0124 (PMC9853917; doi:10.1158/2767-9764.CRC-22-0124)
Supplement: Supplementary Table 6 — DEG in LDE vs control treated fSMO;GFAP-cre tumors [file crc-22-0124-s05.xlsx]

## Sheet: Sheet1
Supplementary Table 6: List of Top Differentially expressed genes in LDE treated vs Control FSmo;GFAPcre tumors
Gene Symbol	logFC	logCPM	F	PValue	FDR
Helt	-4.83029	-1.40592	44.8705	6.79449e-06	0.000172924
Ssu2	-4.77619	-1.07467	43.3003	8.33708e-06	0.000191753
Chat	-4.18069	-1.23172	39.4682	1.40793e-05	0.000260063
Wif1	-2.91192	0.885623	24.6793	0.000400429	0.00259836
Sytl3	-2.88723	-1.47695	20.5976	0.000383456	0.00251263
Gm28746	-2.7838	-1.44692	28.3727	8.20729e-05	0.000826666
Slc18a3	-2.40288	0.523723	35.7563	2.6319e-05	0.000382167
9530053A07Rik	-2.39312	4.19404	36.6296	0.000175166	0.00140531
RP24-115M13.2	-2.29493	-0.270157	26.3756	0.000118413	0.00106348
Tbx1	-2.24028	3.91255	93.2687	7.73856e-07	5.99199e-05
Gm45529	-2.21654	0.256957	58.9323	1.34431e-06	7.70697e-05
Pdlim3	-2.19142	6.25984	41.8352	0.000138155	0.00118702
Fndc3c1	-2.18181	-1.29602	16.3585	0.00104086	0.00546587
Gucy2f	-2.18176	0.227477	17.1777	0.00113835	0.0058482
Gm20559	-2.14885	2.33928	32.5317	0.000129756	0.00113493
Meox2	-2.14276	-0.925382	18.5634	0.000608843	0.00359662
Skap1	-2.13787	-0.808695	25.4026	0.000142524	0.00121208
Hist1h2bl	-2.10011	-0.989766	16.1565	0.00109548	0.00568033
1700018A04Rik	-2.05319	-1.23866	23.1253	0.000224126	0.00168181
Gm13237	-2.04791	-0.505599	24.2551	0.000178428	0.00142121
Kcnn4	-2.04159	0.541493	23.4064	0.000257246	0.00186031
4930538E20Rik	-2.01565	-1.02086	20.1417	0.000424265	0.00271541
Hus1b	-1.98562	-1.07948	16.0789	0.00111733	0.0057671
Lama5	-1.97152	7.09157	33.6321	0.000302251	0.00210622
Slit1	-1.90283	3.12796	17.5475	0.00214527	0.00963118
Pgpep1l	-1.90251	-1.20906	19.5891	0.000480494	0.00300407
Vsx2	-1.87257	5.71253	25.2056	0.000810947	0.00451339
Edaradd	-1.86689	3.44561	31.0162	0.000231932	0.00172639
Gm43353	-1.81721	-1.0768	14.926	0.00150792	0.00727027
Igf2bp1	-1.81533	3.28376	53.3415	9.87926e-06	0.000211924
Orm2	-1.79107	0.897091	28.8202	7.57833e-05	0.000783014
D630003M21Rik	-1.79044	5.80265	84.8812	3.15444e-06	0.000114711
Adamts14	-1.78743	5.266	39.0194	0.000130426	0.00113874
Gm6567	-1.78177	-0.219619	17.5512	0.000775014	0.00436718
Loxl1	-1.75949	5.90525	33.7882	0.000268251	0.00191601
Foxa2	-1.75321	4.36598	23.2505	0.000881899	0.00480642
Slc22a3	-1.73895	0.863071	24.0352	0.00020124	0.00155203
Shox2	-1.70892	0.539788	21.1152	0.000345086	0.00232078
Rbp4	-1.70477	3.55594	50.4739	1.5225e-05	0.000274998
Slitrk6	-1.6986	2.03645	23.4593	0.000401609	0.00260089
Tmem171	-1.69622	-0.503464	23.9212	0.000190728	0.00149457
Gm44022	-1.68804	0.0456551	18.9596	0.000555135	0.00335585
Zbtb7c	-1.67453	0.672531	26.5971	0.000113594	0.00103308
Alx4	-1.66851	4.90623	48.8421	3.53838e-05	0.000462464
Adamts19	-1.65906	1.45963	47.6635	4.78451e-06	0.00014552
AI838599	-1.62015	0.145914	14.5397	0.00170399	0.00798966
Akna	-1.59933	5.34832	35.4246	0.000182895	0.00145025
9030622O22Rik	-1.59198	2.53552	21.5401	0.000680073	0.00393376
Gm42810	-1.5802	0.850662	21.0587	0.000359036	0.00239542
2700046A07Rik	-1.56885	2.70368	44.0867	1.21036e-05	0.000236653
A930032L01Rik	-1.55405	0.727049	23.0108	0.000229458	0.00171322
Hist1h1d	-1.5357	0.115352	14.7328	0.00158757	0.00757536
AW551984	-1.52892	0.694269	19.4199	0.000499373	0.00309382
Gm14230	-1.52844	1.88834	56.7004	1.7005e-06	8.53077e-05
Gpr153	-1.50704	8.58336	44.0624	6.95644e-05	0.000739597
Foxf2	-1.50317	3.72959	69.3179	1.06317e-06	6.74925e-05
Cbln4	-1.49805	3.30118	50.0402	8.04409e-06	0.000187679
Jag1	-1.48992	5.22006	59.5483	1.08596e-05	0.000223104
Irx6	-1.48753	-1.14563	15.1989	0.00140306	0.00688424
RP24-141K13.3	-1.48744	0.786354	14.6773	0.00184149	0.00850509
Cldn2	-1.48327	0.965008	36.9363	2.03298e-05	0.000322802
Igf2os	-1.48222	2.14636	29.9601	8.28764e-05	0.000831975
Vwa3b	-1.47866	1.01525	33.7681	3.30701e-05	0.000445432
Flnc	-1.47788	5.70643	53.2258	2.64222e-05	0.00038322
Foxo6os	-1.46985	1.33761	35.6848	2.45455e-05	0.000366673
Upp1	-1.43995	1.69325	32.4656	4.07797e-05	0.000508373
Rnf125	-1.43902	0.711675	30.0086	6.157e-05	0.000680073
Gm42739	-1.43714	-0.696827	15.0491	0.00145954	0.00709154
Grip1os2	-1.43425	-0.373624	13.6795	0.00211567	0.00950998
Actc1	-1.41943	1.07872	15.8013	0.0013858	0.00681676
Col28a1	-1.39757	3.38306	28.0341	0.000239033	0.00176975
RP24-422N15.4	-1.39292	1.15371	23.6345	0.000202061	0.00155589
Gm10182	-1.38773	0.409826	15.8257	0.00119212	0.00606198
Hhip	-1.38715	5.79225	22.9617	0.000985261	0.00524005
Gm42435	-1.38054	-0.103163	14.1705	0.00184795	0.0085268
Gm5447	-1.37258	-0.168711	13.9222	0.00197817	0.0090037
Ccnd1	-1.35242	7.71534	32.9441	0.000247067	0.00181367
Gm44874	-1.35083	1.71847	27.4043	9.78191e-05	0.000932974
Pcdh18	-1.35001	4.73107	37.1363	9.53313e-05	0.000916303
Nes	-1.34983	6.11796	33.6666	0.000227899	0.00170447
Hes1	-1.3449	3.55149	27.2539	0.000279696	0.0019839
Megf6	-1.34291	3.83481	30.7608	0.000170492	0.00137892
C1ql2	-1.33738	1.44017	30.2011	5.95647e-05	0.00066646
Hist1h2bk	-1.33594	-0.446033	17.3489	0.000814104	0.00452577
Gsx1	-1.33391	0.00870209	23.3931	0.000212197	0.00161222
Epha2	-1.33232	3.02467	38.3166	2.60494e-05	0.00038094
Gm44758	-1.32868	1.03996	20.8696	0.00036123	0.00240758
Arsj	-1.32404	0.22489	25.9838	0.000127518	0.00112141
Gsg1l	-1.32081	7.73879	105.279	2.81863e-07	4.34763e-05
Col5a2	-1.31487	5.46256	53.9569	1.62673e-05	0.000286372
Gm38031	-1.31479	1.73224	33.8241	3.27777e-05	0.000443
Angptl2	-1.31173	6.42814	32.6309	0.000256357	0.00185906
Pgf	-1.30898	2.93766	18.9385	0.00110163	0.00570178
Gm12064	-1.30561	0.0185877	14.9632	0.00149312	0.00721563
4930405N21Rik	-1.30202	-0.145503	14.7783	0.00156838	0.00750589
Cracr2a	-1.30192	2.52622	27.6246	0.000129402	0.00113336
Smco4	-1.30095	4.29298	102.236	3.96384e-08	2.66613e-05
Sox18	-1.29896	6.94068	56.9692	1.72679e-05	0.000294646
Cdh4	-1.2983	6.19202	31.5909	0.000288531	0.00203174
Foxo6	-1.27331	5.84314	71.3081	3.43343e-06	0.000119181
Lrig3	-1.27049	6.72235	32.2553	0.000264913	0.00190022
Prokr1	-1.26488	2.2577	27.826	9.88658e-05	0.00094189
Gm44645	-1.26257	2.63676	28.4261	0.000110039	0.00101236
Gm24270	-1.25894	5.66891	22.6666	0.000951717	0.00510315
Lsp1	-1.2566	4.29941	35.9113	8.24637e-05	0.000829545
Myc	-1.25082	4.28159	65.8963	1.3085e-06	7.54618e-05
Rprml	-1.22654	3.47435	21.8742	0.000666879	0.00387965
C230057A21Rik	-1.20953	1.03361	28.3047	8.3079e-05	0.000833148
Pdgfa	-1.20127	5.632	28.8612	0.000354198	0.00237129
Fbln2	-1.1837	3.6061	19.7732	0.00102533	0.00540473
Eya4	-1.18275	4.31779	72.5443	4.77085e-07	5.07474e-05
Egr2	-1.1735	1.55782	31.3344	4.91582e-05	0.000582911
Thsd7b	-1.17121	1.28803	18.4648	0.000623115	0.00366533
Pcna-ps2	-1.16894	0.585932	21.7108	0.000301245	0.00210147
Gm38285	-1.15599	0.373384	16.684	0.000959242	0.00513012
Cmtm7	-1.1559	2.33007	27.7343	9.20966e-05	0.000896742
Gas1	-1.15115	5.58728	52.4725	1.49136e-05	0.000270884
Cxcr4	-1.14925	6.01346	38.1941	0.000102624	0.000965162
Ier5	-1.14921	7.37858	70.9032	3.09808e-06	0.000114036
Ajuba	-1.14753	3.43289	53.2676	2.47777e-06	0.000103117
Gm37194	-1.14553	2.46782	42.8853	8.80864e-06	0.000199065
Pqlc1	-1.1444	5.7014	60.1943	6.69447e-06	0.000172761
Lrrc46	-1.14253	-0.181864	17.7889	0.0007318	0.00417696
Gm3550	-1.14212	-0.0663118	15.6588	0.00124454	0.00626622
Smoc1	-1.13961	6.74086	58.9392	1.03687e-05	0.000217897
Mr1	-1.12055	4.68827	79.6888	2.35262e-07	4.20027e-05
Whrn	-1.11878	6.4468	24.2511	0.000743386	0.00422571
Hes5	-1.11876	1.83451	15.7521	0.00135663	0.00670893
Smc2	-1.10476	8.00919	33.3779	0.000184931	0.00146163
Gypc	-1.10451	2.93493	48.9831	4.07632e-06	0.000133023
Slc5a7	-1.0994	3.4229	41.3808	1.28538e-05	0.000245217
Lrr1	-1.0986	1.99106	40.2709	1.25771e-05	0.000241799
Elfn1	-1.09345	2.55395	24.5446	0.000183869	0.00145619
Gm37311	-1.08822	1.15439	17.2182	0.000840551	0.00463699
Peg12	-1.08762	3.51755	94.0322	6.89338e-08	3.08889e-05
Gli1	-1.0863	7.34749	20.7821	0.00127405	0.00638996
Mical1	-1.08148	5.26846	59.8862	3.61614e-06	0.000123091
Kcng2	-1.08072	1.43593	17.6327	0.000759876	0.00429808
Gpc3	-1.08007	3.64131	58.0556	1.47304e-06	7.98068e-05
Kl	-1.07929	2.55255	28.2037	8.46006e-05	0.000844486
Rad51b	-1.07726	1.41893	19.9321	0.000444666	0.00281776
Nr3c2	-1.07724	3.74166	50.9789	3.38134e-06	0.000118298
Hsd11b2	-1.07532	6.33794	111.673	5.90492e-08	2.98671e-05
Piezo2	-1.07399	1.58617	18.8824	0.000565164	0.0033964
Ror2	-1.07175	4.25576	34.8625	6.52904e-05	0.000710083
Rmst	-1.06704	0.930324	14.1073	0.00188017	0.00863659
Pou3f4	-1.06504	5.20949	53.0177	7.75691e-06	0.000184298
Slc25a13	-1.06339	2.6587	28.7546	7.66697e-05	0.000789653
Rflna	-1.06272	2.93247	28.8122	8.54215e-05	0.000848323
Sox1	-1.05456	6.27093	43.3259	5.1011e-05	0.000600847
4930558J18Rik	-1.05439	0.871014	15.9042	0.00116836	0.00596611
Gm35040	-1.05367	5.39071	43.1952	3.31686e-05	0.000445432
Cklf	-1.04968	6.00424	87.1409	3.57957e-07	4.58161e-05
Mmp14	-1.0438	6.60752	85.3993	5.21704e-07	5.07474e-05
Ccnb1	-1.04238	6.57235	48.375	2.65354e-05	0.000384575
Ticam2	-1.0404	2.65204	45.1717	6.53713e-06	0.000172553
Phldb2	-1.03901	4.11354	29.6551	0.000142568	0.00121208
Acss3	-1.0382	1.67362	31.5032	4.77927e-05	0.000571969
Kif2c	-1.0369	5.67677	38.8339	6.83826e-05	0.000731996
Ccnb2	-1.03408	5.13719	53.6394	5.93489e-06	0.000162686
Ngfr	-1.03362	5.55662	27.0349	0.000382562	0.00251032
Cdk6	-1.03025	8.79138	76.9061	5.42421e-07	5.10063e-05
Nin	-1.02948	6.80891	72.0133	1.90511e-06	8.98823e-05
Itga9	-1.02897	4.1497	16.273	0.00221886	0.00990209
Fbln1	-1.02887	4.17899	18.1942	0.00144989	0.0070517
Ncapg	-1.02858	5.50383	60.2135	3.55798e-06	0.000121861
Cdh20	-1.02416	6.94473	59.7144	6.89105e-06	0.000173694
Gm36948	-1.02413	0.632035	16.2406	0.00107236	0.00559647
Gm28727	-1.02147	0.691172	26.3056	0.000119984	0.00107312
Adamts20	-1.01511	4.82251	21.2292	0.00086834	0.00474851
Col4a1	-1.01206	7.64303	25.2447	0.000578031	0.00345663
Neurod4	-1.00629	3.88884	43.7128	9.36182e-06	0.000206944
Stk32b	-1.00453	0.889397	15.6005	0.00126345	0.00634338
Dchs2	-1.0023	0.965268	14.3267	0.00177106	0.00824643
Fstl1	-1.00192	6.1	97.4196	1.16228e-07	3.61491e-05
Trpm3	1.00012	5.86723	30.0192	0.000250676	0.00183292
Zfr2	1.00108	4.92358	57.6576	2.51369e-06	0.000103176
Slc35g2	1.00161	2.67383	42.6621	9.07469e-06	0.000202487
Dusp26	1.00247	5.14076	29.7147	0.00020078	0.00155094
Sv2a	1.0026	7.2943	39.2827	7.53489e-05	0.000780328
Necab1	1.00338	3.95603	19.3145	0.00102669	0.00540811
Ttc34	1.00351	0.389882	14.8155	0.00155287	0.00745739
Cntn3	1.00501	1.65525	37.2436	1.94243e-05	0.000314069
Col19a1	1.00676	2.17353	23.4374	0.000210298	0.00160081
Syn2	1.00793	7.06369	87.3022	3.44129e-07	4.58092e-05
Tenm2	1.00925	4.57026	46.6506	9.60887e-06	0.000209594
Gabbr2	1.00948	7.01498	25.896	0.000527234	0.00323345
Epha1	1.00948	1.24423	21.1493	0.000339901	0.00229693
Cdh8	1.01005	4.81935	20.9611	0.000909237	0.00492778
Car11	1.01135	4.14166	24.8686	0.000347678	0.00233487
Susd2	1.01285	0.896239	18.9514	0.000556196	0.00336056
Pclo	1.01297	7.70258	105.721	5.73908e-08	2.98671e-05
Plp1	1.01299	9.83642	17.8843	0.00180957	0.00838354
Me3	1.01351	3.73751	22.0658	0.000533594	0.00326283
Fam13a	1.01384	4.92509	41.8666	2.54401e-05	0.000375992
Cdh23	1.01444	0.779305	18.1015	0.000679062	0.00393217
Rasd2	1.01488	2.55836	23.7167	0.000199096	0.0015416
Camk2b	1.01514	7.78642	43.6118	4.11533e-05	0.000511063
Des	1.01566	1.54327	31.394	4.86711e-05	0.00057961
Tmem132c	1.01649	2.42878	18.7294	0.000657145	0.00383762
Gpr22	1.01769	3.86677	27.34	0.00018573	0.00146461
Gm42878	1.02067	1.47326	20.2737	0.000411962	0.00265555
Abcc12	1.02115	1.56711	24.2515	0.000178556	0.00142165
Ptpn3	1.02171	3.21845	51.4044	3.06431e-06	0.000113038
Gm26782	1.02245	1.49794	37.2305	1.94619e-05	0.000314157
Zfp385b	1.02311	5.45657	77.0495	4.6988e-07	5.07474e-05
Nap1l3	1.02436	4.26941	47.4098	7.46782e-06	0.000181419
Nefl	1.02475	5.22778	25.2306	0.000465931	0.00293339
Ndrg3	1.0254	7.94833	58.016	7.47705e-06	0.000181419
Fa2h	1.02691	4.72246	33.404	9.57661e-05	0.000919573
Spock2	1.02701	8.75246	58.0743	4.90142e-06	0.000146552
Hspa1b	1.02824	1.31196	24.3294	0.000175813	0.00140714
Mmp23	1.02837	1.63936	25.6339	0.000136325	0.00117389
Lrrc75b	1.02893	4.05187	21.253	0.000716812	0.00410951
Gm14964	1.02917	1.12502	18.536	0.000612771	0.00360887
Pdlim2	1.02971	2.21254	37.3182	1.92115e-05	0.000312448
Tspan4	1.02983	5.30166	24.8996	0.000506589	0.00312955
Tmem56	1.03042	5.0973	44.8475	2.00746e-05	0.000320583
Gm26835	1.03075	1.06532	15.4777	0.0013044	0.0065287
Tex15	1.0314	1.54223	14.6739	0.00161277	0.0076805
Kcnip2	1.03194	2.24002	24.7667	0.000161288	0.00132486
Lancl3	1.03293	1.22037	14.508	0.00168632	0.00792208
Gm12198	1.03385	0.395784	13.7007	0.00210323	0.0094622
Inha	1.03483	3.26158	37.3981	1.91644e-05	0.000312184
Larp6	1.03494	3.69359	28.0019	0.000155084	0.00128806
Trpv2	1.03538	3.53613	49.4187	3.86919e-06	0.000128543
Map7	1.03588	3.66465	22.6302	0.000476935	0.00299189
Fads6	1.03633	4.60176	35.2014	6.86512e-05	0.000733596
Gm26811	1.03673	0.63606	17.3528	0.000813329	0.00452405
Gm16638	1.03704	0.961159	26.8398	0.000108566	0.00100475
Nab2	1.03722	3.0211	34.6714	2.86935e-05	0.000405173
RP23-433H22.3	1.0374	2.66244	34.6779	2.86644e-05	0.000405173
Synpr	1.03814	6.33296	28.8374	0.000351802	0.0023585
Kiss1r	1.03876	1.65523	27.8546	9.01064e-05	0.000884007
Tmem8	1.03949	2.96505	37.9798	1.74352e-05	0.000296201
Pard6b	1.03974	1.97128	30.7408	5.43259e-05	0.000625859
Hhatl	1.04028	1.68333	16.5424	0.000993822	0.00527298
Prkar1b	1.04151	5.64156	38.7111	6.8963e-05	0.000735997
Syngr1	1.04153	7.62988	41.1729	6.17248e-05	0.000680953
Afap1l2	1.04631	5.45115	34.7637	0.000111784	0.0010214
Slco2a1	1.04827	3.22185	70.2996	4.49632e-07	4.99349e-05
Cntnap2	1.04897	4.98398	54.6806	4.73518e-06	0.000144471
Gm44562	1.04934	0.712436	17.0671	0.000872337	0.004765
Rps6kl1	1.05061	3.88246	65.6263	6.92036e-07	5.65324e-05
Syt3	1.05227	4.63072	64.3144	1.0432e-06	6.74106e-05
Hapln1	1.05254	1.65533	24.3279	0.000175865	0.00140714
Ltbp2	1.05384	4.75646	55.9769	3.38595e-06	0.000118298
Ankrd34b	1.05415	3.48284	35.8081	3.2259e-05	0.000438429
Syp	1.05416	7.4189	52.1275	1.66749e-05	0.000289613
Tbr1	1.05555	0.676416	18.5574	0.000609705	0.00359843
Tmem102	1.05605	0.384217	22.556	0.000252098	0.00183865
Rara	1.05679	3.01464	18.2508	0.00100926	0.0053374
Nebl	1.0573	5.71787	27.1471	0.000409146	0.00264178
Rell2	1.05741	3.23483	23.4163	0.000330523	0.00225235
Hecw1	1.05775	3.83545	52.2599	2.82532e-06	0.00010982
Sprn	1.05875	4.14557	40.9012	2.09384e-05	0.000328705
Epb41l4b	1.05937	5.56738	33.3789	0.000150333	0.00126208
Gm26871	1.06049	1.96264	29.4842	6.74311e-05	0.000726454
Spock3	1.06119	3.88731	47.9785	5.64117e-06	0.000159587
Gm15513	1.06183	3.05785	35.8518	2.39295e-05	0.000359961
Rgs17	1.06286	5.39731	64.8499	2.09329e-06	9.50381e-05
Gm44829	1.06311	1.31506	20.287	0.000410744	0.00264945
Sel1l3	1.06377	6.9008	97.0673	1.88693e-07	3.91771e-05
Neb	1.06423	3.55625	44.3337	8.00943e-06	0.000187321
Col20a1	1.06445	2.20279	33.4921	3.4555e-05	0.000454745
Azin2	1.06455	3.41433	28.4493	0.000128508	0.00112808
Snap91	1.06531	7.30812	83.2677	6.54166e-07	5.54233e-05
Pla2g3	1.06537	2.48827	19.8127	0.000543004	0.00329884
Abcc8	1.06542	5.68552	110.015	3.15202e-08	2.66613e-05
Gm42946	1.06608	0.462124	16.8148	0.000928503	0.0050131
Clec2l	1.06816	4.9973	19.3253	0.00138548	0.00681676
Svep1	1.06874	3.40325	24.5192	0.000292941	0.00205906
Unc80	1.07035	6.88207	43.918	4.81273e-05	0.000574541
AI854703	1.07082	2.89376	62.0457	9.79979e-07	6.64301e-05
Slc43a2	1.07148	6.69496	65.6648	4.33022e-06	0.000136867
Snph	1.07213	5.1429	73.8148	5.94471e-07	5.41716e-05
Trabd2b	1.07262	2.54195	15.3006	0.00185169	0.008538
Pcdha3	1.07268	1.75158	27.5532	9.51896e-05	0.000916303
Cabyr	1.07275	1.59133	23.6734	0.00020048	0.00154924
Brinp1	1.07347	5.72903	32.2687	0.000188737	0.00148266
6430548M08Rik	1.07378	6.51061	63.1079	5.75438e-06	0.000160656
Sptb	1.07486	7.34424	44.9755	4.21869e-05	0.000520242
Lgi3	1.07563	5.73942	39.139	7.44321e-05	0.000773576
Rasgrp1	1.07663	3.3529	22.5401	0.000450095	0.00284568
Dhrs11	1.07692	3.30368	57.8455	1.50594e-06	8.10748e-05
Lrp8	1.07719	7.06998	61.8299	6.43241e-06	0.000171018
Radil	1.07739	4.27595	40.9889	2.37328e-05	0.000357832
Jakmip1	1.08145	3.40534	67.0679	6.04241e-07	5.41716e-05
Penk	1.08394	3.523	20.1314	0.000837607	0.00462731
Syt5	1.08422	3.11187	38.1216	1.70792e-05	0.000293758
AF529169	1.08425	3.88797	61.1309	1.07389e-06	6.77634e-05
6430573F11Rik	1.08617	5.42273	34.5561	0.000123384	0.00109406
Gm29514	1.08636	0.855884	22.7467	0.000242309	0.0017872
Cygb	1.08642	4.87661	38.3411	5.32462e-05	0.000615244
Tekt2	1.087	1.84962	22.7799	0.00024065	0.00177969
Atcayos	1.08724	1.33107	32.3757	4.13827e-05	0.000512602
Cntnap5a	1.08985	1.89165	21.683	0.000303036	0.00210988
Thrsp	1.09	3.47938	51.5036	3.02939e-06	0.000112574
Ache	1.09	4.31287	48.0126	8.50834e-06	0.000194541
Reep6	1.09033	3.59313	50.3972	3.45862e-06	0.000119181
B3galt5	1.09328	3.46775	29.4466	0.000116165	0.00105171
Dpf3	1.09332	5.32328	77.8754	5.01902e-07	5.07474e-05
Unc13d	1.09361	1.32557	18.6184	0.000601048	0.00356465
Clstn3	1.09562	7.32557	34.5591	0.000162402	0.00133008
Ntm	1.09805	7.35056	30.8796	0.000272165	0.00193827
Kcnab1	1.10038	4.7052	23.2335	0.00063465	0.00372529
Sync	1.10106	1.68979	23.0569	0.000227294	0.0017023
Thy1	1.10271	6.01366	20.2101	0.00139729	0.00686458
Rsph10b	1.10341	1.26722	29.4271	6.81071e-05	0.000731206
Cdkl2	1.10395	2.53673	21.8624	0.000351166	0.00235586
Xk	1.10408	3.60358	43.7319	1.02485e-05	0.000217207
Chl1	1.10445	7.32508	30.3842	0.000292278	0.00205514
Gm1043	1.10466	0.978796	15.7505	0.00121541	0.00615465
Tmem145	1.10476	6.33797	54.4977	1.55045e-05	0.000278221
Abca8b	1.10482	3.92979	70.3204	4.48791e-07	4.99349e-05
Car7	1.10482	3.21155	19.2363	0.000931003	0.00502055
Svop	1.10491	4.71837	43.1139	2.49089e-05	0.000370715
Slc2a6	1.10501	3.47721	57.6143	1.5431e-06	8.21649e-05
Ano5	1.10838	0.880539	24.7485	0.000161863	0.00132791
Ndrg4	1.11096	8.01703	38.2717	9.54834e-05	0.000917311
Gm11190	1.11222	1.62957	40.3479	1.24428e-05	0.000241158
Slc39a2	1.11236	1.76967	39.4248	1.4166e-05	0.000261211
Fnbp1	1.11281	7.91501	109.704	6.50854e-08	3.08521e-05
Scn4b	1.11374	3.80173	28.8397	0.000165955	0.00135008
Etnk2	1.11375	1.89649	32.5333	4.03319e-05	0.000504408
Nrip3	1.11375	4.25882	46.7923	1.05525e-05	0.000219773
Syne4	1.11657	2.25912	34.6647	2.87235e-05	0.000405173
C77080	1.11668	4.93473	66.938	1.22803e-06	7.21048e-05
2010107G23Rik	1.1168	3.74656	54.8635	2.18591e-06	9.63339e-05
Skor2	1.1178	2.10319	19.151	0.000591954	0.00352039
Car10	1.11781	6.42586	45.4805	4.40218e-05	0.000537095
Gm14204	1.11788	1.91885	36.4054	2.20089e-05	0.000339861
Hpcal4	1.11799	3.44891	51.9838	2.86656e-06	0.00011032
Tmem25	1.11832	4.73558	62.8229	1.74454e-06	8.60726e-05
Vgf	1.11899	3.84768	19.5153	0.00108536	0.00564765
Pak1	1.12084	6.91823	49.4503	2.79311e-05	0.000398809
Plekhd1	1.12098	4.31622	21.2664	0.000862847	0.00472645
Wscd2	1.12113	6.33321	82.5091	1.03601e-06	6.74106e-05
Lrtm1	1.12116	1.57613	15.3151	0.00141281	0.006921
Zdhhc22	1.12124	3.45437	37.6156	2.6886e-05	0.000388209
Itgb4	1.12141	2.85784	32.665	4.18484e-05	0.000517381
Nyx	1.1215	2.72033	44.5508	7.08041e-06	0.000175969
Lgi2	1.12298	4.51711	24.0478	0.000538686	0.00328399
Ppip5k1	1.12416	5.60357	110.102	3.97792e-08	2.66613e-05
Ptprr	1.12468	5.2177	23.2789	0.000729465	0.00416852
Gm37928	1.12524	1.31865	25.2209	0.000147621	0.00124415
Zbtb46	1.12555	5.99321	52.5122	1.77398e-05	0.000299023
Gabrg2	1.12579	5.66437	32.9584	0.000180236	0.00143326
Iqsec3	1.12678	4.64331	49.7362	9.57636e-06	0.00020912
Tceal5	1.12683	3.86927	26.0567	0.000296011	0.00207314
Ripply2	1.12905	0.560941	23.5117	0.000207148	0.00158376
Gls2	1.12925	2.73891	40.6131	1.19926e-05	0.000234956
Ccdc92	1.13008	5.1558	55.639	6.73533e-06	0.000172761
Rasal1	1.13027	2.59305	37.4286	1.89011e-05	0.000310257
Adarb1	1.13028	7.06194	91.1298	4.45057e-07	4.99349e-05
Tfap2a	1.13337	1.53492	21.4709	0.000317114	0.0021845
Slc24a2	1.13343	5.84864	29.3329	0.000330141	0.00225212
Rapgef4	1.13586	5.13674	35.0741	0.000107693	0.000999054
Phf24	1.13774	4.02674	50.4187	5.57334e-06	0.000158591
Selenom	1.13964	5.58443	53.5424	1.2784e-05	0.000244305
Trim62	1.14161	6.66169	76.0092	2.00626e-06	9.31081e-05
Sez6l2	1.14189	7.14939	75.4611	2.04646e-06	9.3977e-05
Cds1	1.14315	4.54577	38.4807	5.09334e-05	0.000600297
4930594M22Rik	1.14343	0.618992	14.7961	0.00156094	0.00747949
Cldn3	1.14428	0.394482	18.1538	0.000670663	0.00389666
Nrsn2	1.14438	1.98336	21.5519	0.00031372	0.00216836
Pip5k1b	1.14472	3.00801	20.0901	0.000729723	0.00416877
Rgs7bp	1.14485	6.20854	24.4154	0.000728033	0.00416279
Krt222	1.1457	3.26885	61.8622	9.98049e-07	6.64301e-05
Asic2	1.14682	4.76168	22.8416	0.000715945	0.00410746
Cacna2d3	1.14704	5.95378	62.3577	6.42006e-06	0.000170923
Itpr3	1.14766	2.96805	26.9561	0.000150854	0.00126482
Clmn	1.14796	5.74932	20.5007	0.00131967	0.00658309
Hpcal1	1.14832	6.12399	26.7843	0.000512263	0.00315958
Srcin1	1.14949	8.24638	83.9342	6.99245e-07	5.67014e-05
Ccdc183	1.15102	0.179251	13.7295	0.00208649	0.00940203
Gm45603	1.1545	-0.205899	17.554	0.000774487	0.00436548
Ank1	1.15518	6.94622	48.8042	3.16994e-05	0.000433049
Slc30a3	1.15587	0.402198	21.1924	0.000336741	0.00228193
Gm16701	1.15641	1.29925	17.3726	0.000809413	0.00450872
Lingo3	1.15677	4.55897	27.5198	0.000303734	0.00211277
Hapln4	1.15752	4.47404	35.8781	7.53628e-05	0.000780328
Fgf14	1.15755	4.36278	39.7346	3.9171e-05	0.000493382
Slco4a1	1.15759	1.80354	31.6647	4.65259e-05	0.000560589
Gm37111	1.15834	1.1911	16.7535	0.000942756	0.00506725
Chchd10	1.1585	1.40251	20.3143	0.000408262	0.00263958
Rtn4rl1	1.15915	4.03037	26.8415	0.000285223	0.00201638
Spock1	1.16096	6.32201	30.6601	0.000301927	0.00210547
Itgb7	1.1618	1.5345	30.5578	5.60413e-05	0.000638586
Mical2	1.16299	5.45752	27.4867	0.000401381	0.00260089
Ak4	1.16388	4.23271	77.9919	2.32349e-07	4.20027e-05
Itga3	1.16466	4.5388	41.8471	3.19337e-05	0.000435649
Kcnh6	1.16493	1.14976	19.5121	0.00048898	0.00304399
Vat1l	1.16633	6.64447	77.9795	1.82226e-06	8.8539e-05
Rasa4	1.16685	4.36855	39.4444	4.20195e-05	0.000518837
Sytl2	1.16769	3.58375	28.2204	0.000185067	0.0014621
Gm26846	1.16869	1.32152	14.8794	0.00157968	0.00754513
Etv1	1.16884	6.34288	33.552	0.000203043	0.00156221
Pax2	1.17071	1.51739	23.1636	0.000222373	0.00167123
L1cam	1.17153	7.51283	115.498	6.2229e-08	3.02355e-05
Gm42492	1.17284	2.77463	72.4549	3.71504e-07	4.59884e-05
Stac2	1.17287	2.37229	26.9067	0.000112426	0.00102568
Dpp6	1.17487	7.25566	36.0173	0.000149246	0.00125567
Spry3	1.17552	3.60073	38.4141	2.93496e-05	0.000411551
Ppp1r1b	1.17731	3.90701	17.2641	0.00187944	0.00863659
Rapgefl1	1.17781	5.2737	49.3746	1.85153e-05	0.000306511
2900072N19Rik	1.17785	1.07273	30.4831	5.67595e-05	0.000644384
Grb7	1.17794	0.563769	20.1111	0.000427172	0.00273185
Tmem151a	1.17886	4.75415	68.0823	1.15481e-06	6.99179e-05
Jph4	1.17991	7.63629	81.8148	1.19567e-06	7.17219e-05
Atp1b1	1.18036	7.69004	27.909	0.000441937	0.00280687
Unc5c	1.18102	6.49875	84.9313	1.05577e-06	6.74925e-05
Gm44830	1.18274	0.0229255	18.1822	0.000666151	0.00387857
Nrk	1.1829	3.57428	16.5801	0.00207623	0.00936664
Arntl2	1.18417	1.00159	19.9751	0.000440385	0.00279976
Ryr2	1.18543	7.31239	84.2892	1.04402e-06	6.74106e-05
Cntfr	1.1873	5.57277	38.0233	9.42897e-05	0.000911248
Gm13416	1.18767	0.586734	29.0339	7.29732e-05	0.000764959
Rtl1	1.18799	1.0354	14.6566	0.00162026	0.00770674
Mctp1	1.18847	4.43162	40.5179	3.89806e-05	0.00049226
Stx1b	1.18861	7.91395	81.4938	1.20359e-06	7.19378e-05
Cadm3	1.18985	9.40778	62.3053	3.99846e-06	0.000131489
Shank1	1.19085	7.12106	50.306	2.85072e-05	0.000403817
Slc4a10	1.19199	5.75526	30.2533	0.000297057	0.00207823
Cdk5r2	1.19237	5.12287	30.987	0.000215441	0.00162922
Pcdha6	1.1924	0.728188	15.2487	0.00138481	0.00681676
Cpne9	1.19261	5.05535	46.7656	2.30007e-05	0.000350054
Rhbdf2	1.19274	3.16132	37.5532	2.50157e-05	0.00037113
A330023F24Rik	1.19277	3.36424	46.476	6.79318e-06	0.000172924
Gm9908	1.19388	-0.432922	14.345	0.00176228	0.00820947
Plcxd2	1.1951	5.41919	26.3061	0.000493482	0.0030671
Kcnd2	1.19538	6.40717	38.7793	0.000110981	0.00101749
Spag17os	1.19576	0.884635	17.6113	0.000763822	0.00431412
Rasgef1a	1.19641	4.07803	36.2264	6.23005e-05	0.000686011
Syt7	1.19642	6.38462	38.283	0.000118128	0.00106238
Fn3k	1.19661	2.83324	44.7486	6.90196e-06	0.000173694
Col9a1	1.19706	2.2713	26.2885	0.000127381	0.00112071
Camk2a	1.1981	4.55759	17.636	0.00198195	0.00901668
Fam135b	1.20049	2.09235	29.0364	7.2942e-05	0.000764959
Pnck	1.20094	4.11801	32.3076	0.000121846	0.00108478
Itpka	1.2013	3.69272	18.9053	0.00129523	0.00648615
Mpp3	1.20217	6.92341	73.6534	2.92744e-06	0.000111727
Arhgef37	1.20225	2.10864	38.1146	1.70965e-05	0.000293758
Sycp2	1.20233	1.42639	25.5009	0.000139853	0.00119738
Slc45a3	1.20415	0.683972	19.5355	0.000486389	0.0030298
Casq2	1.2054	2.79453	24.5841	0.000251724	0.00183734
Trnp1	1.20599	5.18654	49.4445	1.84911e-05	0.00030648
Zfyve28	1.20656	5.68585	38.3439	9.75633e-05	0.000931766
Elmod1	1.20687	4.66664	33.3242	0.000130198	0.00113726
Ankrd35	1.20798	1.4282	21.8217	0.000294214	0.00206577
Unc5a	1.20802	3.67999	52.0291	4.09907e-06	0.000133443
A930018M24Rik	1.20851	2.21959	39.4794	1.4057e-05	0.000260063
Echdc3	1.20908	0.126902	16.4756	0.00101062	0.0053388
Fabp3	1.20927	4.01615	21.9184	0.000768128	0.00433466
Atp6ap1l	1.20956	0.675749	20.7315	0.000372327	0.00246296
9430041J12Rik	1.21117	0.659984	23.618	0.000202738	0.00156048
Gm10516	1.21123	0.716447	31.882	4.48804e-05	0.000544137
Epha10	1.21192	1.69128	20.0649	0.000439634	0.00279591
Gpr150	1.21197	1.49123	35.5749	2.49608e-05	0.000370715
Doc2b	1.21331	5.06734	18.5531	0.0017933	0.00833002
Kirrel3	1.21463	5.30686	45.1814	3.41524e-05	0.000452147
Akain1	1.2148	2.60657	16.189	0.00174544	0.00814665
Cpne6	1.21499	1.3046	19.2982	0.000513471	0.00316603
Gm29017	1.22421	1.2268	19.6447	0.000474471	0.00298039
Atp6v1g2	1.22579	5.748	78.0932	1.46761e-06	7.98068e-05
Htr1b	1.22589	1.90407	19.3825	0.000581194	0.0034734
Napb	1.22774	6.41668	50.613	2.99538e-05	0.000416716
Marveld2	1.22774	1.85623	30.8732	5.31228e-05	0.000614548
Gm11611	1.23027	4.36925	78.6798	3.06865e-07	4.48842e-05
Cacnb4	1.23172	6.13648	32.997	0.000228353	0.00170628
Klhl3	1.2322	3.8726	39.9585	3.15972e-05	0.00043295
Jph3	1.23394	5.90821	42.4744	6.60301e-05	0.000716125
Cdh7	1.23436	3.89043	21.7937	0.000776991	0.00437387
Lipc	1.23469	-0.369905	16.4878	0.00100753	0.00533115
D130043K22Rik	1.23576	1.47647	56.4597	1.74492e-06	8.60726e-05
Scn1b	1.23594	6.04428	32.2359	0.000248858	0.00182443
Pacsin1	1.23936	6.83412	56.1447	1.71421e-05	0.000293789
Dlg2	1.23983	7.34752	41.8261	7.85973e-05	0.000803414
Gm26721	1.24054	0.0739816	14.6074	0.00164181	0.0077761
Kifc2	1.2409	5.96346	28.0981	0.000437055	0.00278224
Slc6a5	1.2411	2.99274	31.3356	7.53276e-05	0.000780328
Rian	1.24245	6.85159	55.4136	1.85999e-05	0.000306867
Fam78b	1.24297	4.57171	73.2816	7.06032e-07	5.67014e-05
Lhx5	1.24674	2.61871	25.3633	0.000201994	0.00155589
Gbp2	1.24708	0.705473	13.789	0.00205233	0.00928685
Slc13a1	1.24722	2.06656	28.7757	7.63828e-05	0.000787533
Frmpd4	1.24913	3.7392	39.3974	3.27421e-05	0.000443
Mir670hg	1.25208	1.96194	54.7644	2.09783e-06	9.50381e-05
Pcsk9	1.25244	3.4133	34.2363	6.29458e-05	0.000692333
Faah	1.25295	3.72613	47.1367	9.84363e-06	0.000211627
Kcnc1	1.25926	7.83603	81.0379	1.60667e-06	8.36415e-05
Chgb	1.25961	7.63795	55.6281	1.77306e-05	0.000299023
Gabra1	1.25964	7.00214	19.6834	0.00168539	0.00791963
Ksr2	1.25968	5.69017	51.8618	2.18662e-05	0.000338351
Pla2g4e	1.26132	2.50286	36.6088	2.13477e-05	0.000333221
Gm27032	1.26141	2.07217	36.1393	2.29091e-05	0.000349481
Olfm1	1.26192	7.38141	50.5144	3.07223e-05	0.000425277
Cend1	1.26223	5.6447	51.8671	2.12983e-05	0.000332743
Phpt1	1.26404	3.53612	19.4669	0.00116776	0.00596461
Drc1	1.26467	0.87682	16.537	0.000995177	0.00527734
Gm12902	1.26542	-0.508199	14.0968	0.00188559	0.00865498
Tmem266	1.2663	4.29735	48.8709	1.29219e-05	0.000245973
Lurap1	1.26643	5.27235	36.1859	0.000118019	0.00106209
Slc22a4	1.26659	4.3345	38.7305	5.60878e-05	0.000638586
Gm37460	1.27043	1.00859	18.6916	0.000590842	0.00351485
Caly	1.27433	3.01092	80.4991	1.89606e-07	3.91771e-05
Catsperg1	1.2747	1.02041	29.6999	6.49471e-05	0.00070873
RP23-22E18.3	1.27582	1.80441	20.6089	0.000433484	0.00276584
Gm42840	1.2768	0.366201	23.5784	0.000204368	0.00156806
Synj2	1.2774	3.66177	38.0663	4.14264e-05	0.000512816
Agbl2	1.27785	1.25908	20.309	0.000408736	0.00264089
Gad2	1.27801	4.52583	26.2742	0.000421752	0.00270341
Mylk2	1.27909	0.258012	19.475	0.000493137	0.00306692
Slc16a5	1.27915	-0.284899	13.5806	0.00217477	0.0097501
Tmem240	1.27932	4.90467	49.5643	1.7559e-05	0.000297784
Cyp46a1	1.28044	3.82573	42.8302	2.18041e-05	0.000338351
Mpp4	1.28158	1.57325	31.2505	4.98536e-05	0.000589919
Pgr	1.28388	2.43954	27.0794	0.000134311	0.00116582
Lrp8os2	1.28782	1.12276	27.4301	9.73573e-05	0.000930255
Nrg2	1.28817	3.75055	73.7869	3.36305e-07	4.55676e-05
Gm37181	1.28875	0.835958	24.7181	0.000162832	0.00133136
Pitpnm1	1.2904	6.30901	29.7503	0.00036804	0.00244116
Adamts18	1.29064	6.0311	65.1359	7.26476e-06	0.000178722
Syt2	1.29255	7.01931	36.5739	0.000155037	0.00128806
Prkce	1.29264	7.04268	61.8795	1.08847e-05	0.000223147
Tm6sf2	1.29294	1.24358	25.0745	0.000151877	0.0012712
Klhl33	1.29546	2.81118	42.2307	1.0264e-05	0.0002173
Gm16894	1.29561	-0.150695	20.8871	0.000359853	0.00239923
Bend6	1.2976	5.35063	39.7517	7.95722e-05	0.000810276
Nptx1	1.30019	7.27875	41.5133	8.73942e-05	0.000864959
Epha6	1.3008	0.0488454	24.4848	0.000170487	0.00137892
Gm42848	1.30134	0.82397	16.8335	0.000924211	0.00499501
A830018L16Rik	1.30172	3.31427	45.8999	9.37023e-06	0.000206944
Zfp941	1.30225	1.43901	40.9347	1.14713e-05	0.000229603
Trank1	1.30377	5.34922	35.0961	0.000147058	0.00124126
Atp1a3	1.30637	9.15265	48.5237	2.78411e-05	0.000397861
Rims1	1.30864	6.59714	79.6176	2.38621e-06	0.000100817
Gm13944	1.3107	1.16437	15.0356	0.00163186	0.00774485
Psg16	1.3121	2.77513	30.2527	9.04716e-05	0.000886247
Prcd	1.31267	0.676323	30.0404	6.12329e-05	0.000677368
Cnfn	1.31376	-0.157916	16.0002	0.00113998	0.00585506
Igsf9b	1.31385	7.58979	64.6806	8.36804e-06	0.00019201
Ndst3	1.31579	6.35193	62.9323	1.05618e-05	0.000219773
Syndig1l	1.31781	4.64097	32.7976	0.00016391	0.00133792
E530001F21Rik	1.31923	0.0387443	14.6882	0.0016066	0.00765676
C1qtnf4	1.32297	5.08182	34.0573	0.000158	0.00130447
Kcnj9	1.32337	4.89259	66.3055	2.71926e-06	0.000107855
Lrrtm3	1.32637	4.85767	82.8706	4.41833e-07	4.99349e-05
Cadps2	1.32898	7.80513	56.5474	1.77659e-05	0.000299203
Prkcg	1.32964	6.44289	20.0388	0.00163576	0.00775577
Gm14342	1.32989	-0.512522	13.6755	0.00211805	0.00951775
Kctd8	1.33042	2.92871	43.4683	1.00904e-05	0.000214793
Csmd2	1.33199	6.47507	54.5488	2.3724e-05	0.000357832
Arhgap26	1.33256	5.83483	38.7416	0.00011462	0.00104032
Dmtn	1.33761	4.5663	73.2275	9.94651e-07	6.64301e-05
Arfgef3	1.33905	6.33736	58.1285	1.70595e-05	0.000293758
Grm1	1.33985	6.76876	39.7148	0.000112684	0.00102625
Gm38383	1.34071	0.162011	15.1439	0.00142351	0.00695996
Nrg3	1.34093	1.94598	38.8326	1.54136e-05	0.000277117
Hcn1	1.34147	5.33705	54.7403	1.45215e-05	0.000265749
Fbxl21	1.34161	0.152971	21.3557	0.000325072	0.00222614
Tfap2b	1.34282	3.20041	41.0429	1.98113e-05	0.000317683
Unc5b	1.34386	6.38908	72.2606	5.01588e-06	0.000147927
Gm37945	1.34577	1.13826	33.6565	3.36616e-05	0.000448398
Slc6a17	1.34588	6.45091	74.0251	4.30514e-06	0.000136493
Dgkg	1.34775	4.02881	29.726	0.000220918	0.00166235
Adap1	1.34821	5.46975	45.0439	4.74527e-05	0.00056999
Speer4b	1.35221	0.0722934	16.1787	0.00108933	0.0056589
Gpr158	1.3534	5.82263	55.0254	1.96832e-05	0.000316412
Gm5148	1.35545	0.955022	23.8652	0.000192882	0.00150609
Colq	1.35561	-0.395995	16.7534	0.000942792	0.00506725
Ppl	1.35651	1.62391	46.1988	5.73895e-06	0.000160656
Gm37899	1.35864	1.26318	27.8784	8.97184e-05	0.00088109
Frzb	1.35881	2.87289	52.1661	2.80735e-06	0.00010956
Snap25	1.3606	8.70214	87.8234	8.08767e-07	6.07606e-05
Caln1	1.36116	6.66208	32.8207	0.000256011	0.00185725
Nefh	1.36178	4.6883	44.2286	3.62436e-05	0.000469596
Spata2l	1.36196	2.55863	49.9842	3.61787e-06	0.000123091
Baiap3	1.36204	1.55302	28.3317	8.26787e-05	0.000830848
Strip2	1.36381	5.29532	23.0749	0.000883415	0.00481199
Gm10118	1.36463	1.73197	35.373	2.57444e-05	0.00037842
Hkdc1	1.36608	1.22007	34.9748	2.73735e-05	0.000393625
Cbln1	1.36687	8.18643	59.022	1.42834e-05	0.000262628
Gm37773	1.36706	1.09126	40.6408	1.19467e-05	0.000234529
Gpr12	1.37566	0.115114	29.4028	6.83975e-05	0.000731996
Tspan17	1.37704	3.51056	58.8429	2.23737e-06	9.73489e-05
Cacna1a	1.37824	8.25345	67.3502	6.67757e-06	0.000172761
Gm37403	1.37898	-0.873485	13.7631	0.00206713	0.00933643
Hipk4	1.37898	1.83017	48.4769	4.33294e-06	0.000136867
Fam184b	1.37929	3.54158	29.7327	0.000187257	0.00147401
Gm12709	1.37986	0.0825524	23.3463	0.00021423	0.00162258
Trhde	1.38192	4.24467	45.3072	2.63185e-05	0.000382167
Gm45486	1.38491	0.807718	32.9146	3.79125e-05	0.000484103
Flt3	1.39001	2.52572	64.7693	7.51038e-07	5.88565e-05
Cacna1e	1.39052	8.47695	106.732	2.26243e-07	4.18766e-05
Cdh18	1.39229	3.67887	34.3959	9.49273e-05	0.000916044
Grin1	1.39436	6.74835	73.5972	4.80088e-06	0.000145705
Lin7a	1.39781	4.89036	45.2602	3.68532e-05	0.000475277
Gm45838	1.40014	1.11365	29.8115	6.37019e-05	0.000698277
Tgm5	1.40153	0.887125	22.5452	0.000252666	0.00184054
6430571L13Rik	1.40216	4.14086	73.0773	7.88331e-07	6.05581e-05
Scg2	1.40315	5.1414	82.6572	8.71018e-07	6.28876e-05
Snca	1.40558	5.23019	48.1345	3.23728e-05	0.000439361
Gm16183	1.40649	2.85175	53.8494	2.32152e-06	9.9162e-05
Scn2a	1.40668	6.71679	48.3286	4.78446e-05	0.000572221
Tspan9	1.40711	6.51843	31.9323	0.00029187	0.00205376
Mirt1	1.4085	3.95633	76.2248	4.76689e-07	5.07474e-05
Il23a	1.41	0.0689908	23.6592	0.000201054	0.0015516
Nrxn3	1.41016	6.16638	47.7082	5.04311e-05	0.000595823
B930025P03Rik	1.41231	2.23654	57.758	1.51988e-06	8.15989e-05
Plch2	1.41315	6.07753	54.3714	2.5629e-05	0.000377634
Car4	1.41533	4.79254	52.9027	1.44171e-05	0.000264585
Kif26b	1.41688	5.23751	31.0707	0.000271818	0.00193721
Sybu	1.41696	5.09967	29.6513	0.000323565	0.00221973
B230206I08Rik	1.41946	0.943009	37.2969	1.92718e-05	0.000312906
Rassf6	1.42092	-0.108326	17.7622	0.000736521	0.00419774
Icam5	1.42353	-0.651563	14.1851	0.00184061	0.00850304
Cnnm1	1.43071	5.28722	42.2936	6.65732e-05	0.000719619
Cited4	1.43318	0.155571	19.2632	0.000517606	0.00318747
Ablim1	1.43501	6.98156	49.631	4.29175e-05	0.000526247
Gm18706	1.43629	0.263008	25.6541	0.000135798	0.0011724
Neurod2	1.43673	6.76772	52.3857	3.38428e-05	0.000450195
Gprc5c	1.43805	3.86396	41.724	3.77553e-05	0.000482746
Faim2	1.43864	5.76985	32.8583	0.000249471	0.00182754
Hapln2	1.43946	2.31643	15.9385	0.00202742	0.00919984
Cdr1	1.44098	3.67714	29.0867	0.000237563	0.00176021
Ralyl	1.44101	3.34424	39.399	3.74215e-05	0.000479972
Aifm3	1.44313	5.27581	48.3215	3.39346e-05	0.000450798
Gm38187	1.44401	0.567983	25.352	0.000143924	0.00122146
Myocd	1.44432	0.00967189	15.8038	0.00119885	0.0060898
Sncb	1.44585	6.31042	60.5008	1.64046e-05	0.000286969
Rnf148	1.44831	0.0014972	17.9717	0.000700422	0.00403827
Gm19582	1.44862	-0.00409158	13.7759	0.00205983	0.00930993
Gabrb2	1.44905	5.67141	26.5418	0.000566007	0.00340042
Tenm1	1.44965	6.01725	40.674	0.000107607	0.000999054
Tmem63c	1.45041	5.11683	57.425	1.16389e-05	0.000230584
Scd3	1.45079	1.98388	31.158	5.53539e-05	0.000634318
Gm37019	1.45181	0.034873	22.3158	0.000265071	0.00190028
Kcnh1	1.45186	4.48693	36.3725	0.000109444	0.0010106
9330121K16Rik	1.4537	1.88432	63.1561	8.78241e-07	6.28927e-05
Rims4	1.45636	6.13757	31.9766	0.000290394	0.00204412
Cyp4x1	1.45681	-0.568761	14.2699	0.0017986	0.00834666
Gas7	1.45882	7.10606	27.4993	0.000543559	0.00329921
Ckmt1	1.46122	5.04036	29.8523	0.00031582	0.00217658
Slc16a11	1.46174	4.10357	49.7471	1.57692e-05	0.000280214
Sh3bgr	1.46181	1.31406	16.251	0.001364	0.00674195
Gm42510	1.46221	0.56863	27.0496	0.000104422	0.000975694
Sptbn4	1.4643	7.0148	80.3407	3.19619e-06	0.000115466
Kcna1	1.46642	5.58359	55.0569	2.01785e-05	0.000321225
Inpp5j	1.46815	4.13631	49.0131	1.78461e-05	0.000299281
Gm44317	1.46923	-1.11648	15.8911	0.00117228	0.00598299
Rph3a	1.47362	7.14348	38.0162	0.00014729	0.0012419
Garnl3	1.4799	5.70726	36.0204	0.000172918	0.00139158
Ackr1	1.48249	5.76595	53.2871	2.75969e-05	0.000395366
Comp	1.48387	-0.467522	15.104	0.00143854	0.00701602
Gm36011	1.48405	-0.35626	16.7931	0.000933521	0.0050286
Camkk2	1.48446	6.65402	53.2916	3.20679e-05	0.000436224
Lgi1	1.48463	4.03615	52.9648	1.03666e-05	0.000217897
Gm42888	1.48785	0.0464262	28.5787	7.91067e-05	0.000806873
Gm3294	1.49059	1.54699	32.9299	3.78192e-05	0.000483246
Pcp2	1.49374	4.00834	21.2735	0.00105613	0.00552959
Alpk2	1.49499	0.354247	25.2136	0.000147828	0.00124536
Syt1	1.49718	7.02824	59.6713	1.84566e-05	0.000306335
Dync1i1	1.50012	4.55049	36.8141	0.00011001	0.00101236
Gm44831	1.50238	1.414	34.4644	2.96352e-05	0.000413725
Scn2b	1.50286	5.80196	32.1266	0.000284773	0.00201403
Mirg	1.50343	2.5555	71.9219	3.89285e-07	4.69923e-05
4833422M21Rik	1.50404	-0.129889	22.5948	0.000250071	0.00183096
Jakmip3	1.5063	3.64633	82.2603	2.43459e-07	4.30147e-05
Clcf1	1.50851	1.48923	28.1885	8.50157e-05	0.000846021
Slc12a5	1.51195	7.16912	34.9189	0.000209964	0.00160025
Meg3	1.51207	8.78578	32.166	0.000269948	0.0019253
Gm13052	1.51389	0.861786	33.033	3.71952e-05	0.000478417
Car15	1.51827	0.83137	36.2237	2.26193e-05	0.000345602
6330419E04Rik	1.52086	-1.22955	14.2171	0.00182462	0.0084357
Tmem59l	1.52443	5.53863	35.7222	0.000177184	0.00141517
Il20rb	1.52443	3.43073	58.7496	3.06513e-06	0.000113038
Rit2	1.52587	4.30304	20.5597	0.00128466	0.00643989
Gm17167	1.52773	-0.913515	13.737	0.00208214	0.00938676
Htr1a	1.52789	-0.253221	21.7369	0.000299573	0.00209276
Tead4	1.52819	1.58277	30.581	5.58206e-05	0.000638109
Runx1t1	1.52991	4.58497	85.6348	5.34002e-07	5.07474e-05
Aloxe3	1.53008	2.19232	21.1164	0.000614492	0.00361789
Tuba4a	1.53168	6.23163	37.5455	0.000160081	0.00131718
Henmt1	1.53238	-0.320503	20.8217	0.000365035	0.00242878
Adam11	1.53249	6.86807	44.2791	7.99153e-05	0.000813013
Gm42583	1.53444	2.36447	33.422	5.2869e-05	0.00061281
3632454L22Rik	1.53511	0.556205	18.0185	0.000692621	0.0040027
Gm16342	1.53756	-0.737033	14.8714	0.00152995	0.00736732
Tmem130	1.53903	4.14024	92.7725	1.69561e-07	3.70608e-05
Syne1	1.54579	8.63806	69.9703	6.05876e-06	0.000164229
Eef1a2	1.54789	7.65645	40.982	0.000109851	0.00101236
Sv2c	1.54969	4.51632	64.8596	4.49721e-06	0.000139673
Nptxr	1.55544	7.59524	47.6075	5.79585e-05	0.000653378
Grin1os	1.55586	2.28918	35.3116	3.69211e-05	0.000475836
Amer3	1.55604	5.3008	47.31	4.43149e-05	0.000539298
Prrt1	1.55666	6.3415	87.6133	2.28233e-06	9.83529e-05
Tnfaip8l3	1.55988	-0.301255	14.8629	0.0015334	0.0073821
Lrrc3b	1.56266	2.57827	31.4115	9.41108e-05	0.000909972
Cpne7	1.56391	-0.386246	13.9869	0.00194328	0.0088698
Tunar	1.5672	4.78089	45.031	4.61803e-05	0.000557116
Ldoc1	1.56782	0.999247	28.2182	8.43804e-05	0.00084272
Map3k5	1.56788	4.81934	76.9511	1.76494e-06	8.64279e-05
Glra2	1.57081	3.79203	30.508	0.000224867	0.00168672
Cplx3	1.57167	-1.09269	14.018	0.00192677	0.00880895
Dnm1	1.57317	8.0478	56.3605	2.49687e-05	0.000370715
A230103L15Rik	1.57321	1.90444	33.8983	3.69907e-05	0.000476102
Ubxn10	1.57498	0.115493	35.3052	2.60139e-05	0.000380707
Pkib	1.57736	4.01758	55.1936	9.54387e-06	0.00020888
C230004F18Rik	1.57887	3.58738	46.0387	2.25203e-05	0.000344361
Gm17116	1.57979	1.22925	66.1931	6.55897e-07	5.54233e-05
Prph	1.58624	-0.122346	17.7905	0.000731516	0.00417656
Kndc1	1.58707	6.1465	36.0713	0.000190791	0.00149457
Rgl3	1.58744	4.1871	44.6529	3.80823e-05	0.000484363
Gm11762	1.58863	-0.625667	19.4044	0.000501147	0.00310363
Atoh8	1.58949	1.77386	29.4171	8.50778e-05	0.000846206
Gm27353	1.59114	0.371227	37.7616	1.79994e-05	0.0003011
Sowahb	1.59375	3.26904	19.0092	0.00146696	0.00711692
Ccdc81	1.59536	-0.263373	18.7354	0.000584841	0.00348769
Cntn6	1.59634	2.87082	20.5645	0.00095619	0.00512013
Il16	1.59681	6.03312	44.9666	7.52334e-05	0.000780236
Gm44680	1.59795	-1.37061	13.8088	0.00204115	0.00924703
Cacna1g	1.59893	7.73256	37.4124	0.000162234	0.00132926
Pld5	1.5991	3.63672	63.602	2.5122e-06	0.000103176
Pkp2	1.59954	0.156639	23.7928	0.000195713	0.00152269
Speg	1.60042	5.35632	74.3803	3.63776e-06	0.000123385
Crhr1	1.60641	4.30137	42.8667	5.28146e-05	0.00061281
Panx2	1.60708	4.46224	95.9358	2.34157e-07	4.20027e-05
Camk4	1.60715	8.15443	47.7587	5.73522e-05	0.000648423
Cpne5	1.60803	-0.0665781	18.757	0.000581899	0.00347655
Gm10037	1.60952	-1.17902	15.8412	0.00118737	0.00604098
Gm38299	1.60957	0.382303	33.431	3.48939e-05	0.000457908
Hs3st1	1.61255	3.82756	28.3453	0.000328306	0.00224118
H2-K2	1.61542	0.0631847	27.4934	9.62359e-05	0.000923171
Hs3st4	1.61673	-0.11764	20.6195	0.000381603	0.00250556
Gm12022	1.61785	2.10733	39.6448	1.63249e-05	0.000286492
Nhsl2	1.62324	5.48975	45.4296	6.15862e-05	0.000680073
Mtus2	1.62738	4.85629	38.8761	0.000105484	0.000984193
Gm15815	1.62792	-0.855564	18.1259	0.000675129	0.00391676
Actrt3	1.62909	-0.370803	24.338	0.000175515	0.00140549
Slc6a7	1.63061	2.95147	42.393	2.23912e-05	0.000342969
Diras2	1.63078	7.59189	46.6707	6.51153e-05	0.000709171
Ramp3	1.63163	1.57541	27.6027	0.000116184	0.00105171
Sptssb	1.63222	1.30997	30.9014	5.28696e-05	0.00061281
Gm26945	1.63229	-0.0385232	29.0677	7.25406e-05	0.00076248
Paqr9	1.63348	4.69749	43.2796	5.93838e-05	0.00066589
Shisa8	1.63385	4.3673	36.7418	0.00011965	0.0010713
Pcnx2	1.63412	4.22112	88.8755	3.6304e-07	4.58161e-05
Gm44810	1.63598	1.12799	54.3329	2.20012e-06	9.6523e-05
Fat2	1.63877	9.09546	66.5239	7.94725e-06	0.000186315
Rps6ka1	1.64099	6.08883	38.7969	0.000141448	0.0012072
Eno2	1.64232	7.32638	41.2008	0.000112519	0.00102568
Rab37	1.64245	1.33265	48.9115	4.11153e-06	0.000133625
Slit3	1.65721	2.99105	62.3047	1.52826e-06	8.17401e-05
RP23-413J12.1	1.66206	0.177372	34.4577	2.96663e-05	0.000413725
Dhrs7c	1.66461	-1.03591	21.3876	0.000322841	0.0022163
Gm9954	1.66705	-0.54484	18.2099	0.000661783	0.00386239
Egr4	1.66865	1.82974	48.3578	4.39592e-06	0.000137576
Sidt1	1.67031	4.13575	48.9779	2.45386e-05	0.000366673
Ankrd34a	1.67453	3.78701	55.129	9.72306e-06	0.000211312
Tmem210	1.67943	0.952207	54.3951	2.18504e-06	9.63339e-05
Ppargc1b	1.68881	3.57222	94.6797	1.12423e-07	3.59641e-05
Gm33320	1.68938	-1.16527	16.6336	0.000971391	0.00518084
Ap1s3	1.68957	0.508719	30.7892	5.38825e-05	0.000621857
Fxyd7	1.68976	2.49386	61.7479	1.00949e-06	6.68071e-05
Arr3	1.69079	-0.574826	17.1165	0.000861783	0.00472328
BC030500	1.69341	-0.839873	16.6363	0.000970728	0.00517873
Chn2	1.69373	6.33558	31.2701	0.000371881	0.00246085
Golga7b	1.69499	4.7736	45.7003	4.88144e-05	0.000580651
Slitrk4	1.69881	3.61637	50.0067	1.65693e-05	0.000288552
Hif3a	1.70054	2.16257	30.5049	0.00010222	0.00096392
Gm42528	1.70379	3.0986	19.1597	0.00143683	0.00701277
Gm45869	1.70504	1.83865	68.8769	5.11381e-07	5.07474e-05
Cfap99	1.70537	0.234161	36.0418	2.32497e-05	0.00035329
5830444B04Rik	1.70664	1.9695	29.0462	0.000120739	0.00107937
Gm20518	1.70677	-0.312779	14.777	0.00156892	0.00750664
Cdkl1	1.7119	1.97278	42.396	1.04806e-05	0.000219731
Ccdc63	1.71385	1.27166	37.5226	1.86416e-05	0.00030725
Kcnh3	1.71842	1.31981	31.4009	5.12701e-05	0.000602439
Gm38032	1.71856	-1.09205	18.6084	0.000602459	0.00356866
Unc13c	1.72055	5.59961	30.9437	0.000351651	0.00235829
Ntf3	1.72233	2.56256	33.9547	7.54359e-05	0.000780599
4930429P21Rik	1.72458	-0.334458	25.247	0.000146876	0.0012411
Lrrc26	1.7246	1.97831	41.0886	1.36762e-05	0.000256563
Fstl4	1.7261	3.00534	20.8582	0.00100869	0.00533586
Gm14344	1.73529	0.14982	33.8503	3.26422e-05	0.000442091
Adcy1	1.7402	9.21135	48.0604	4.90109e-05	0.000582221
Ipcef1	1.74086	4.73377	35.665	0.000163637	0.00133625
Nos1	1.74209	6.04935	31.7787	0.000346026	0.00232619
Gm43373	1.74561	-0.729888	17.4971	0.000785257	0.00440701
Ppfia4	1.74871	7.27642	50.8859	4.79839e-05	0.000573534
St8sia5	1.75025	4.19504	45.54	4.24716e-05	0.000522563
Gm42898	1.7516	0.380954	20.4918	0.00039312	0.00255785
Tesc	1.76315	2.82538	92.3314	7.77202e-08	3.27182e-05
Olfm3	1.76617	5.05598	45.3209	6.12367e-05	0.000677368
Coro2a	1.76737	3.10484	49.6171	1.21828e-05	0.000237485
Kcnk3	1.77398	4.60882	28.1147	0.000442292	0.00280821
D630039A03Rik	1.77694	-0.0901602	14.0085	0.0019979	0.00908499
Rnf112	1.77698	6.37691	28.4521	0.000539539	0.00328816
Cemip	1.7788	5.85011	74.8879	6.66833e-06	0.000172761
Kcnt1	1.77949	6.2122	47.6747	6.39755e-05	0.000700486
Tmod1	1.78174	3.78283	43.7985	4.46383e-05	0.000541877
Phyhip	1.78394	6.93891	35.0868	0.000243122	0.00179252
Gm15520	1.79112	0.172751	21.4969	0.000315351	0.00217484
Ablim3	1.79419	5.65763	52.4616	3.91485e-05	0.000493382
Calb2	1.79624	6.31282	40.4615	0.000138673	0.00118885
Galnt15	1.80023	3.56797	29.6783	0.000283427	0.00200744
Kcnk12	1.80068	3.63935	38.578	8.34132e-05	0.000835637
9630001P10Rik	1.8024	-0.208382	29.328	6.92983e-05	0.00073798
Krt25	1.80509	0.451065	27.888	8.95622e-05	0.000880891
Car9	1.81157	0.205753	33.7557	3.31353e-05	0.000445432
Sstr3	1.81245	2.08842	33.8941	5.97828e-05	0.00066823
Atp2b3	1.81304	6.71902	52.8882	4.24431e-05	0.000522563
Plk5	1.8135	2.57515	28.9905	0.000201327	0.00155208
Crtam	1.81733	2.85645	22.4645	0.000745052	0.00423394
Gm37067	1.81898	-0.883117	16.4016	0.00102963	0.0054171
Cacna1i	1.82863	4.71269	40.7495	9.50595e-05	0.000916303
Mrgprf	1.82989	2.45051	34.5091	7.35765e-05	0.000768602
Syt4	1.83311	6.33821	23.5136	0.00107179	0.00559502
Slc17a7	1.83798	7.28501	44.4118	9.25687e-05	0.000900437
Sebox	1.84458	1.51229	30.7314	7.64266e-05	0.000787567
Gm42656	1.84914	1.22291	42.4777	9.30135e-06	0.000206125
1700023F06Rik	1.84961	0.481085	30.2997	5.85661e-05	0.000659191
Mal2	1.85076	1.26337	37.3799	1.90374e-05	0.000311219
Gabrd	1.8547	5.33857	28.1527	0.000512098	0.00315956
Bhlha9	1.85716	0.68063	38.4467	1.62937e-05	0.000286492
Kcnk9	1.86097	3.29711	24.5914	0.000608168	0.00359481
Gm42447	1.86318	-0.547497	16.784	0.000935634	0.00503713
Grm4	1.869	7.87671	59.6487	2.42767e-05	0.000364057
Gabra6	1.86901	6.79885	29.9788	0.000451093	0.00285105
Scn11a	1.87502	1.039	27.0445	0.00012963	0.00113434
Bcl2l15	1.88037	3.84886	46.7885	3.61051e-05	0.000468426
Epn3	1.88139	3.54106	53.0628	1.41932e-05	0.000261465
Grin2a	1.8852	4.55213	35.9375	0.000168409	0.00136547
Gm12977	1.89675	0.797269	48.6021	4.26779e-06	0.00013553
Gm32444	1.89871	-0.438719	26.6836	0.000111773	0.0010214
Grin2c	1.89872	6.47989	59.5524	2.61812e-05	0.000381148
5330437M03Rik	1.89895	-0.793139	21.3151	0.000327926	0.00223937
Cbln3	1.89978	7.78626	32.4427	0.000342947	0.00231109
Gm9899	1.90298	3.34259	35.1016	0.000126659	0.00111729
4930471C04Rik	1.90489	-0.714044	22.7514	0.000242074	0.00178615
Tmc1	1.90695	-0.665224	29.7247	6.4668e-05	0.000706477
Gm26995	1.90881	-1.14291	17.3661	0.000810702	0.00451339
Vsnl1	1.90971	5.84328	85.1663	3.77969e-06	0.000126434
Gm43230	1.91333	-1.03203	16.7468	0.000944348	0.0050714
B230110C06Rik	1.91513	-0.612712	16.8876	0.000911875	0.00493489
Atoh7	1.91533	1.06979	37.9088	1.76165e-05	0.00029809
Col17a1	1.92514	1.93131	37.2431	3.40638e-05	0.000451589
Csmd2os	1.92956	-0.298477	29.3095	6.95232e-05	0.000739597
Phgdh-ps1	1.93607	-0.241949	21.2869	0.000329932	0.00225148
Gm15527	1.94489	1.02259	20.4541	0.000606464	0.00358692
Mybpc3	1.9481	5.34006	38.8559	0.000140631	0.00120192
Ptpn22	1.9547	3.25483	50.3264	1.72984e-05	0.000294908
9130019P16Rik	1.96986	1.03939	34.0166	3.45052e-05	0.000454745
Gm7068	1.97204	-1.02718	19.1563	0.000530488	0.00324992
Gm23369	1.98937	-1.44575	13.906	0.00198706	0.00903781
Gm14033	1.99461	0.181177	33.2303	3.60333e-05	0.000468167
Gm15337	1.99486	-1.31097	13.86	0.00201244	0.00914255
Gm14061	2.00763	-0.189272	22.8638	0.000236513	0.00175476
Gm5535	2.00948	-0.984693	18.6242	0.000600237	0.00356202
Cabp2	2.03194	0.071107	16.5143	0.00117604	0.0059959
RP24-310D17.4	2.03324	0.256217	49.1251	4.00745e-06	0.000131562
RP23-260J19.5	2.04219	0.531714	29.4222	6.83199e-05	0.000731996
Myo5c	2.06811	1.01614	63.4231	8.55591e-07	6.21647e-05
RP23-366E4.10	2.08413	-0.26361	20.1783	0.000420812	0.00269917
Fam205a1	2.08591	-1.00259	19.2792	0.000515709	0.00317781
Spata20	2.10526	-0.272713	20.5801	0.000384931	0.0025189
Gm11186	2.10772	-1.54932	14.0563	0.00190662	0.00873529
Gm45620	2.11027	-1.30086	18.0083	0.000694313	0.0040101
Rtp1	2.1126	-1.16742	17.7531	0.000738124	0.00420194
Gm42772	2.12654	-1.04106	16.2022	0.00108284	0.00563605
Gm12295	2.13776	0.122844	32.8733	3.81665e-05	0.000484815
Prr15	2.18714	-0.734895	22.8629	0.000236556	0.00175476
Ly6g6d	2.20592	-0.774858	25.2653	0.000146357	0.00123779
1700024B18Rik	2.2245	-1.21419	19.0123	0.000548411	0.0033214
Htr7	2.24665	-1.4532	18.2655	0.000653127	0.0038176
Gm43065	2.25423	-0.145207	38.8631	1.53464e-05	0.000276421
Gata3	2.25753	-1.29465	16.6131	0.00097637	0.00520216
Gm27151	2.27351	-1.06146	15.0791	0.00144802	0.00704614
6530403H02Rik	2.36422	-0.797004	19.9868	0.000439235	0.00279428
2310044K18Rik	2.38731	0.152787	46.1534	5.77184e-06	0.000160656
Gm11985	2.41772	-0.0698643	27.1086	0.00010329	0.000968372
Gm11417	2.46667	-1.39485	15.2866	0.00137114	0.00676943
Gm17087	2.48554	-1.21043	14.9828	0.00148538	0.00718296
Gm37916	2.54663	-1.1823	14.7964	0.00156083	0.00747949
RP24-363B22.1	2.5611	-1.43545	21.173	0.000338158	0.00228913
Gm44675	2.64941	-0.442352	46.0973	5.81269e-06	0.000161173
9530036M11Rik	2.74247	-1.39833	14.7627	0.00157492	0.0075261
Gm15472	2.75089	-0.795244	34.6644	2.87248e-05	0.000405173
Chil5	2.75503	0.191386	25.912	0.000192852	0.00150609
Olfr277-ps1	2.82825	-0.890554	24.5371	0.000168735	0.00136754
1700016P03Rik	3.07868	-1.56388	19.9608	0.0004418	0.00280687
Mov10l1	3.13228	-1.22207	35.2308	2.63132e-05	0.000382167
Gm37668	4.18358	-1.58688	37.6959	1.81735e-05	0.000303438
