# Supplementary material for: Cancer Stem Cells, not Bulk Tumor Cells, Determine Mechanisms of Resistance to SMO Inhibitors
Source: Cancer Res Commun. 2022 Jun 6;2(6):402–16. doi: 10.1158/2767-9764.CRC-22-0124 (PMC9853917; doi:10.1158/2767-9764.CRC-22-0124)
Supplement: Supplementary Table 8 — DEG in LDE vs control in SD-CSC Ptch;p53 tumors [file crc-22-0124-s07.xlsx]

## Sheet: Sheet1
Supplementary Table 8: Differentially expressed genes in SD-CSC tumors
SD-CSC
	logFC	AveExpr	t	P.Value	adj.P.Val	B
Cotl1	1.76296	5.96037	14.109	3.01e-06	0.0459364	-1.91126
Bok	0.978172	7.67436	6.86969	0.000283441	0.7791	-2.18635
Ypel5	0.68619	5.70636	6.05185	0.000598492	0.7791	-2.45484
Prex1	1.6324	7.3017	6.04836	0.000600497	0.7791	-2.32903
Olfml2b	1.34619	5.10006	5.8468	0.000730309	0.7791	-2.76036
Suclg2	-1.16265	5.35247	-5.60064	0.000933644	0.7791	-2.74244
Adrbk2	0.817777	5.66125	5.07784	0.00161375	0.7791	-2.68798
Cntn2	1.3805	8.4687	5.06538	0.00163565	0.7791	-2.60709
Sidt2	0.63321	5.81372	4.91538	0.00192717	0.7791	-2.69138
Adipor2	-0.587432	6.68202	-4.8248	0.00213102	0.7791	-2.6343
Dcc	-0.728275	7.03966	-4.69216	0.00247428	0.7791	-2.67254
Zfml	-0.568886	7.85535	-4.64087	0.00262312	0.7791	-2.70698
Fam212b	-0.7444	7.61331	-4.63443	0.00264252	0.7791	-2.70155
Gsg1l	-0.745929	7.9775	-4.59754	0.00275664	0.7791	-2.72691
Sema4f	1.4915	5.09442	4.57453	0.00283063	0.7791	-3.04968
Sema7a	-0.893501	8.83377	-4.55264	0.00290303	0.7791	-2.78151
Tm7sf3	-0.608918	5.62769	-4.54987	0.00291234	0.7791	-2.86241
Pdzrn4	-0.769605	5.98476	-4.54388	0.00293259	0.7791	-2.80191
Vat1	0.667764	6.35082	4.52669	0.00299155	0.7791	-2.74074
Clip2	0.804912	6.20056	4.5195	0.0030166	0.7791	-2.76038
Nup210	-0.670332	6.95814	-4.51457	0.00303392	0.7791	-2.73215
Irs1	-0.567063	8.17546	-4.49923	0.00308851	0.7791	-2.76779
8430419L09Rik	-0.703472	6.19498	-4.49907	0.00308905	0.7791	-2.78383
Pde5a	-0.668456	5.80353	-4.47368	0.00318184	0.7791	-2.85188
Lmtk3	0.797978	5.85923	4.47342	0.00318278	0.7791	-2.82432
Dopey2	0.8322	5.20906	4.47072	0.00319284	0.7791	-2.98685
Mogs	-0.638012	5.868	-4.46103	0.00322921	0.7791	-2.8421
Fam136a	-0.694726	6.21597	-4.37755	0.00356205	0.7791	-2.82334
Mapk8ip3	0.569816	7.30261	4.36158	0.00362997	0.7791	-2.78567
Trpc4ap	0.564424	7.44126	4.36033	0.00363532	0.7791	-2.78975
Hnrnpf	-0.475574	9.60133	-4.27568	0.00402068	0.7791	-2.91614
Asun	-0.515684	6.39979	-4.27257	0.00403567	0.7791	-2.83825
Chkb	0.511197	5.17274	4.26534	0.00407076	0.7791	-3.04998
Zyx	0.743607	6.77992	4.22578	0.00426883	0.7791	-2.83438
Timp3	1.44864	5.41195	4.22087	0.00429417	0.7791	-3.04826
Mapkbp1	0.489622	5.72385	4.13616	0.0047581	0.7791	-2.96088
Sdc3	1.20588	7.19776	4.12153	0.00484368	0.7791	-2.88087
Cand2	-0.968789	5.67456	-4.04724	0.00530529	0.7791	-3.04563
Igsf3	0.568781	5.91136	4.04384	0.0053276	0.7791	-2.96676
Psat1	-0.522793	9.37587	-4.02955	0.00542223	0.7791	-2.99542
Slfn9	-1.03904	5.62255	-3.97504	0.00580067	0.7791	-3.08913
Mob1a	-0.560905	7.47232	-3.97287	0.00581634	0.7791	-2.94537
KCTD12	-0.914802	5.24127	-3.92561	0.00616908	0.7791	-3.19275
Rusc1	0.635828	5.0992	3.91964	0.00621524	0.7791	-3.19069
Ntrk3	-1.16792	6.30387	-3.89401	0.00641799	0.7791	-3.02467
Ipo8	-0.4127	7.32684	-3.88971	0.00645269	0.7791	-2.97721
Cenpe	-0.421028	7.48552	-3.87608	0.00656408	0.7791	-2.98651
Apoe	1.99801	6.99637	3.87102	0.00660602	0.7791	-3.00445
Mbd4	-0.492616	5.30441	-3.86849	0.00662702	0.7791	-3.16848
Ppfia2	-0.718777	6.35456	-3.82652	0.00698732	0.7791	-3.02921
Gap43	0.920348	7.37009	3.8212	0.00703442	0.7791	-3.00831
Lrrn1	-0.516177	7.23212	-3.81897	0.00705428	0.7791	-3.00746
Ube2w	-0.475969	5.49812	-3.8115	0.0071214	0.7791	-3.14488
Arhgef1	0.390435	6.37945	3.79273	0.00729289	0.7791	-3.02518
Gstm5	-0.627565	6.70126	-3.79121	0.007307	0.7791	-3.02434
Dgke	0.471939	5.22912	3.78466	0.00736802	0.7791	-3.20147
Gigyf1	0.386465	6.32266	3.75176	0.00768325	0.7791	-3.04709
Tacc2	0.67975	6.38231	3.70106	0.00819813	0.7791	-3.06964
Sugt1	-0.396882	6.08981	-3.68286	0.00839206	0.7791	-3.10569
Crtc1	0.404599	5.55996	3.6532	0.00871893	0.7791	-3.18322
Hexb	0.848069	5.15198	3.65002	0.00875479	0.7791	-3.28422
Cldn2	-4.01367	6.55302	-3.63017	0.0089823	0.7791	-3.34536
Map7d1	0.628908	7.06895	3.62683	0.00902129	0.7791	-3.09221
Zxdc	-0.604353	5.0832	-3.616	0.00914875	0.7791	-3.32781
Leng8	0.521151	7.09045	3.6091	0.00923088	0.7791	-3.10058
Luzp1	-0.435412	6.45671	-3.60618	0.0092659	0.7791	-3.11521
Foxj2	-0.47625	5.44247	-3.60242	0.00931131	0.7791	-3.24169
Stx6	-0.528142	7.55124	-3.59298	0.00942618	0.7791	-3.11784
Emg1	-0.503757	7.11537	-3.59078	0.00945314	0.7791	-3.11207
Sepp1	1.35977	5.84276	3.57332	0.00967039	0.7791	-3.20231
Dusp8	0.63272	5.78983	3.57251	0.00968057	0.7791	-3.18547
Gm10231	-0.405904	6.91078	-3.56202	0.0098138	0.7791	-3.12471
Ncs1	0.637833	6.88591	3.55387	0.00991869	0.7791	-3.12681
Fkbp4	-0.530523	9.14089	-3.547	0.0100081	0.7791	-3.19012
Hmgn5	-0.438962	6.32259	-3.54275	0.0100638	0.7791	-3.1532
Ezh2	-0.541355	7.74199	-3.54058	0.0100924	0.7791	-3.14757
Arhgef25	0.474524	5.47277	3.53699	0.0101399	0.7791	-3.2505
Zfp462	-0.557843	7.3801	-3.52064	0.0103593	0.7791	-3.14983
Tdrkh	-0.459889	6.08186	-3.51728	0.0104051	0.7791	-3.18492
Hip1r	0.428314	5.93651	3.4984	0.010666	0.7791	-3.19932
Plekha8	-0.472867	5.89193	-3.48939	0.010793	0.7791	-3.21894
Rnf130	-0.413438	5.38616	-3.486	0.0108413	0.7791	-3.30077
Slc16a2	-0.665175	5.2921	-3.48416	0.0108675	0.7791	-3.33329
Nampt	-0.459153	6.96285	-3.46731	0.0111114	0.7791	-3.17196
Helz	-0.443568	5.77732	-3.46557	0.0111369	0.7791	-3.24427
Fam129b	0.565559	5.5577	3.46325	0.011171	0.7791	-3.26976
Rpn1	-0.509361	7.91795	-3.46113	0.0112024	0.7791	-3.19101
Hid1	0.467965	5.28857	3.44898	0.0113834	0.7791	-3.32545
Lsm5	-0.578264	5.21088	-3.44627	0.0114243	0.7791	-3.36327
Serbp1	-0.480523	9.56883	-3.44356	0.0114653	0.7791	-3.25565
Pbx3	-0.584743	5.59105	-3.43667	0.0115701	0.7791	-3.29137
Igf2r	0.820591	5.11254	3.43209	0.0116405	0.7791	-3.37953
Thumpd3	-0.460129	5.90137	-3.41144	0.0119634	0.7791	-3.25464
Pdzd11	-0.492737	5.03436	-3.40933	0.0119968	0.7791	-3.41714
Ube3a	-0.39709	6.84879	-3.409	0.0120021	0.7791	-3.20152
Cdh20	-0.399714	7.59605	-3.40748	0.0120262	0.7791	-3.20991
Tubb3	0.7823	8.17046	3.40227	0.0121097	0.7791	-3.22692
Dbn1	1.06902	6.23303	3.39445	0.0122362	0.7791	-3.23543
RP23-199B2.4	0.525646	5.692	3.38958	0.0123157	0.7791	-3.2832
Nudcd1	-0.42562	5.6529	-3.38534	0.0123853	0.7791	-3.29986
Isy1	-0.445576	6.00277	-3.37542	0.0125498	0.7791	-3.26112
Kank1	-0.677846	6.55782	-3.36997	0.0126413	0.7791	-3.23277
Gm17322	-1.10785	6.9238	-3.36538	0.0127189	0.7791	-3.23421
Stt3b	-0.405798	7.3704	-3.36321	0.0127558	0.7791	-3.22846
Ankrd26	-0.43098	5.6755	-3.36045	0.0128027	0.7791	-3.30836
Farsb	-0.440677	6.35427	-3.35956	0.0128179	0.7791	-3.24231
Krtcap2	-0.530993	5.6284	-3.34844	0.0130096	0.7791	-3.32461
Tle1	-0.374535	7.19911	-3.34288	0.0131066	0.7791	-3.23655
Atp2b2	-0.748168	6.08237	-3.33896	0.0131754	0.7791	-3.28091
Cnpy2	-0.521458	5.68425	-3.33683	0.0132129	0.7791	-3.32147
Stxbp1	0.7319	7.34479	3.33267	0.0132867	0.7791	-3.24344
Slc1a5	-0.512233	5.94689	-3.32217	0.0134747	0.7791	-3.295
Stmn4	0.894251	5.83896	3.32098	0.0134961	0.7791	-3.30464
Ipo7	-0.491796	7.68397	-3.30817	0.0137299	0.7791	-3.26323
Trib2	-0.567562	6.49476	-3.30616	0.0137669	0.7791	-3.26588
Yae1d1	-0.414488	5.48236	-3.28945	0.0140793	0.7791	-3.37227
Sorl1	-0.859006	5.52929	-3.28243	0.0142127	0.7791	-3.38676
Hint1	-0.442769	7.37043	-3.26541	0.0145422	0.7791	-3.27998
Pml	-0.68419	5.63587	-3.25396	0.0147684	0.7791	-3.3744
Mrps2	-0.380482	5.4659	-3.25131	0.0148211	0.7791	-3.39216
Xrcc5	-0.640228	6.21262	-3.24936	0.0148603	0.7791	-3.31311
Wdr12	-0.409553	5.85477	-3.23779	0.0150942	0.7791	-3.34506
Rprd2	-0.400752	6.01452	-3.23717	0.015107	0.7791	-3.32902
Zfp422	-0.419063	7.44076	-3.23603	0.0151302	0.7791	-3.29673
Ppip5k2	0.382421	6.39191	3.23506	0.01515	0.7791	-3.29882
Ddit4	-1.1297	7.60497	-3.23418	0.0151681	0.7791	-3.30364
Ccdc132	0.422791	6.97649	3.23049	0.0152438	0.7791	-3.29304
Gm26809	0.735053	6.26027	3.23024	0.0152491	0.7791	-3.31115
Hirip3	-0.412011	6.69468	-3.22058	0.0154497	0.7791	-3.303
Nova1	0.479163	6.3447	3.21673	0.0155304	0.7791	-3.31133
Lrp6	-0.462942	6.87308	-3.21205	0.0156292	0.7791	-3.30593
Flrt2	-0.742009	6.15278	-3.20989	0.015675	0.7791	-3.34112
Wdpcp	-0.643455	5.82743	-3.19788	0.0159323	0.7791	-3.37555
Klhl42	-0.50308	5.50099	-3.19422	0.0160116	0.7791	-3.41796
Sec13	-0.414958	7.03175	-3.1833	0.0162508	0.7791	-3.32101
Tia1	-0.520922	8.18828	-3.17911	0.0163434	0.7791	-3.34373
Anln	-0.423238	7.1209	-3.17719	0.0163861	0.7791	-3.32483
0610030E20Rik	-0.406923	5.82712	-3.16359	0.0166921	0.7791	-3.38622
Ppp4r2	-0.384175	7.48346	-3.16078	0.0167563	0.7791	-3.33824
Med13	-0.322242	7.54238	-3.15725	0.0168369	0.7791	-3.34104
Qsox1	0.750735	6.35013	3.15702	0.0168422	0.7791	-3.34625
Dtx3	0.418189	6.07495	3.15203	0.0169571	0.7791	-3.36229
Bscl2	-0.487761	5.43243	-3.1483	0.0170435	0.7791	-3.45086
Plk1	-0.334614	6.64491	-3.13873	0.0172674	0.7791	-3.34793
Map1lc3a	0.465469	5.8621	3.12907	0.0174966	0.7791	-3.39368
Scrt2	0.772531	5.59006	3.1232	0.0176376	0.7791	-3.43356
Etnk1	-0.43859	7.83333	-3.11969	0.0177224	0.7791	-3.36768
Gm3608	-0.402708	5.50884	-3.11861	0.0177487	0.7791	-3.45103
Lrch2	-1.40926	7.34063	-3.11677	0.0177934	0.7791	-3.36785
Zfp704	0.502729	7.87803	3.11499	0.0178366	0.7791	-3.37073
Slco3a1	0.525606	5.48406	3.11394	0.0178622	0.7791	-3.44918
Myo18a	0.371933	6.59229	3.11344	0.0178744	0.7791	-3.35966
Tmem28	-0.409167	5.20421	-3.11092	0.0179364	0.7791	-3.50738
Mmp24	1.14398	6.73088	3.10787	0.0180113	0.7791	-3.36787
Xrcc6	-0.462343	5.85775	-3.09847	0.0182447	0.7791	-3.41865
Vgll4	-0.658743	6.04436	-3.06845	0.0190118	0.7791	-3.4225
Prmt2	0.595053	5.59087	3.06448	0.0191158	0.7791	-3.46053
Unc45a	0.353632	5.40972	3.05875	0.0192669	0.7791	-3.48696
Bcl2l13	-0.455359	8.29478	-3.0583	0.0192788	0.7791	-3.41225
Fam171a2	0.466865	5.44292	3.05598	0.0193406	0.7791	-3.48397
Phgdh	-0.594879	7.97982	-3.04448	0.0196491	0.7791	-3.41301
Etfa	-0.354859	6.1889	-3.04376	0.0196684	0.7791	-3.41931
Scpep1	-0.479756	5.62681	-3.04351	0.0196754	0.7791	-3.47516
Strap	-0.404095	8.4656	-3.04135	0.0197339	0.7791	-3.42576
Ppp2r5b	0.412788	5.92805	3.03362	0.0199453	0.7791	-3.43892
Scd1	-0.857795	6.48216	-3.03207	0.0199878	0.7791	-3.42196
Cep350	-0.434368	6.9637	-3.02871	0.0200808	0.7791	-3.40784
Tspan6	-0.432757	6.22311	-3.02401	0.0202114	0.7791	-3.42982
B4galnt1	0.520212	5.09117	3.02232	0.0202584	0.7791	-3.56152
Amotl1	-0.421809	5.53815	-3.01935	0.0203417	0.7791	-3.49788
Myt1	0.798539	6.08859	3.01705	0.0204064	0.7791	-3.4397
Acsl3	-0.427463	6.29773	-3.01681	0.0204131	0.7791	-3.42978
Ndufa9	-0.435994	6.74664	-3.01475	0.0204713	0.7791	-3.41735
Rad50	-0.444729	5.51221	-3.00617	0.0207154	0.7791	-3.50901
Syt11	0.475129	7.91004	3.00593	0.0207222	0.7791	-3.43261
Aebp2	-0.467222	6.29296	-3.00418	0.0207726	0.7791	-3.43783
Tbata	-0.661001	8.01203	-3.00283	0.0208113	0.7791	-3.43736
Myl12a	1.14123	8.28511	3.00208	0.020833	0.7791	-3.44377
Uqcrc2	-0.343554	7.17305	-2.99634	0.0209988	0.7791	-3.42697
Slc25a15	-0.344304	5.28635	-2.99451	0.021052	0.7791	-3.54719
Jund	0.469018	6.70759	2.99391	0.0210696	0.7791	-3.42667
Cdc123	-0.32827	6.3952	-2.99153	0.021139	0.7791	-3.43819
Ccdc77	-0.4055	5.18014	-2.98872	0.0212215	0.7791	-3.57028
Ccnb2	-0.388288	6.43911	-2.98828	0.0212344	0.7791	-3.43939
Mid1	1.5543	7.74867	2.98451	0.0213455	0.7791	-3.44401
Jun	0.499282	6.18842	2.98365	0.0213708	0.7791	-3.44887
Gng10	-0.47969	6.07475	-2.98273	0.0213983	0.7791	-3.46349
Cep55	-0.40233	5.89084	-2.97517	0.0216235	0.7791	-3.48083
Tex261	-0.383117	6.657	-2.96871	0.0218179	0.7791	-3.44488
Ctsb	0.722866	7.95221	2.96833	0.0218296	0.7791	-3.45518
Reln	1.37138	7.76979	2.96752	0.021854	0.7791	-3.45343
Nt5dc3	0.537437	5.50083	2.96158	0.0220348	0.7791	-3.52586
Ctsd	0.778559	8.3423	2.95899	0.0221143	0.7791	-3.46906
Sec61a1	-0.439053	8.26783	-2.95679	0.0221819	0.7791	-3.46882
Trappc5	-0.370593	5.49517	-2.94977	0.0223992	0.7791	-3.53893
Mrpl51	-0.44839	6.11282	-2.94788	0.022458	0.7791	-3.47992
Rnf165	0.638087	6.54023	2.94331	0.0226011	0.7791	-3.45977
Mef2a	0.403862	6.05929	2.94291	0.0226135	0.7791	-3.47959
Brsk2	0.506511	6.96132	2.93829	0.0227592	0.7791	-3.45865
Arl8b	-0.361641	7.13171	-2.93403	0.0228946	0.7791	-3.46311
Mcu	-0.37745	5.93079	-2.93108	0.0229888	0.7791	-3.50157
Pnrc2	-0.370499	7.21574	-2.92265	0.02326	0.7791	-3.47054
Mthfd1	-0.455219	6.47846	-2.91592	0.0234789	0.7791	-3.48107
Ndufb2	-0.461824	5.6936	-2.91427	0.0235331	0.7791	-3.53587
Prmt3	-0.36104	5.51808	-2.9068	0.0237795	0.7791	-3.55851
43712	0.919297	5.70005	2.9016	0.0239525	0.7791	-3.54112
Npm1	-0.423371	9.78897	-2.89649	0.0241238	0.7791	-3.54372
BC005764	1.07381	5.68958	2.88138	0.0246381	0.7791	-3.55669
Abce1	-0.435308	7.94265	-2.87514	0.024854	0.7791	-3.50954
St3gal2	0.439648	5.5247	2.87475	0.0248677	0.7791	-3.5686
Rab11b	0.404212	7.01511	2.87458	0.0248737	0.7791	-3.49661
Fnbp1	-0.53488	6.0984	-2.87147	0.0249819	0.7791	-3.52633
Rnf219	-0.362625	5.51539	-2.86733	0.025127	0.7791	-3.58023
Nipbl	-0.320767	7.3414	-2.86539	0.0251952	0.7791	-3.50575
Slc20a1	0.340901	6.82937	2.86474	0.0252183	0.7791	-3.50211
Pitrm1	-0.378908	6.91077	-2.86058	0.0253655	0.7791	-3.50632
Ier5	-0.433884	8.18236	-2.85805	0.0254555	0.7791	-3.52432
Knstrn	-0.412423	6.95669	-2.85652	0.0255099	0.7791	-3.50896
Tgfbr1	0.947291	5.46875	2.85646	0.0255123	0.7791	-3.5943
Anks1	0.462714	6.34155	2.84861	0.0257943	0.7791	-3.52052
Abca1	1.14934	5.06121	2.84781	0.0258233	0.7791	-3.66909
Sub1	-0.446504	7.26553	-2.84101	0.0260706	0.7791	-3.51997
Bcl2l11	0.488356	5.01049	2.83776	0.0261896	0.7791	-3.66634
Dusp11	-0.486526	7.82018	-2.82913	0.0265087	0.7791	-3.53475
Aplp1	0.6139	6.23739	2.82197	0.0267763	0.7791	-3.5417
Glod4	-0.521639	5.36512	-2.82092	0.0268157	0.7791	-3.62939
Zfp516	-0.426442	5.9426	-2.8158	0.0270095	0.7791	-3.56746
Zkscan8	-0.538851	5.88377	-2.81403	0.0270766	0.7791	-3.57538
Osbp2	1.05655	6.29065	2.81326	0.0271059	0.7791	-3.55037
Chst15	1.53434	5.24509	2.80355	0.0274783	0.7791	-3.67844
Ahcyl2	0.779348	6.21161	2.80147	0.0275591	0.7791	-3.55689
Lyz2	1.20363	6.90658	2.80111	0.027573	0.7791	-3.54527
Elovl2	-0.644312	5.362	-2.80082	0.0275843	0.7791	-3.64491
Ybx3	-0.467688	7.91648	-2.80008	0.0276127	0.7791	-3.55383
Gm10053	-0.419191	6.70282	-2.79172	0.0279396	0.7791	-3.55006
Arhgap19	-0.359564	6.57717	-2.79113	0.027963	0.7791	-3.55193
Mier2	0.33452	5.41837	2.79072	0.0279791	0.7791	-3.62739
Wdr61	-0.402919	5.1521	-2.78634	0.0281519	0.7791	-3.67671
Prdx3	-0.589136	5.65966	-2.7822	0.0283165	0.7791	-3.61632
Fancd2	-0.467972	6.14328	-2.78176	0.0283343	0.7791	-3.57522
Dnmt3a	-0.451976	7.42208	-2.78164	0.0283392	0.7791	-3.55767
Gdi2	-0.286224	8.59243	-2.77453	0.0286242	0.7791	-3.58214
Plcb4	0.688934	5.28917	2.76971	0.0288197	0.7791	-3.65969
Islr	-1.51764	5.91038	-2.7602	0.0292087	0.7791	-3.63707
Lemd2	0.412481	5.54246	2.75858	0.0292754	0.7791	-3.63091
Bach1	0.354997	5.84976	2.75263	0.0295225	0.7791	-3.60543
Pola1	-0.407161	6.30051	-2.75054	0.0296095	0.7791	-3.58564
Fkbp9	-1.26005	5.91416	-2.74439	0.029868	0.7791	-3.63542
Zbed4	-0.359541	6.21943	-2.73258	0.0303709	0.7791	-3.59932
Bag6	0.44008	8.20854	2.73203	0.0303942	0.7791	-3.59987
Fxr1	-0.382425	6.66606	-2.73104	0.0304369	0.7791	-3.58759
Tmem189	0.367512	5.00335	2.7306	0.030456	0.7791	-3.72058
Ctxn1	0.726175	5.70898	2.72854	0.0305445	0.7791	-3.63446
Cnbp	-0.319395	9.44579	-2.72716	0.0306044	0.7791	-3.63006
Tmem55a	-0.673246	5.08433	-2.72432	0.0307275	0.7791	-3.72879
Arhgap33	0.673995	6.53245	2.71717	0.03104	0.7791	-3.59679
Lsm3	-0.443705	6.02197	-2.71671	0.0310603	0.7791	-3.62092
Igdcc4	-0.671512	6.8102	-2.71647	0.0310708	0.7791	-3.59766
Mdh1	-0.36757	7.96491	-2.71251	0.0312454	0.7791	-3.60781
Ttc9c	-0.416838	6.46134	-2.71248	0.0312467	0.7791	-3.60368
Synj1	0.325785	5.64813	2.71138	0.0312955	0.7791	-3.64695
Plcb1	0.893797	5.45594	2.70436	0.0316081	0.7791	-3.67824
Arpc5	0.477105	7.18157	2.70095	0.0317613	0.7791	-3.60425
Ttc3	0.448298	9.19185	2.69922	0.0318392	0.7791	-3.63999
Atat1	0.776678	5.15124	2.69805	0.0318923	0.7791	-3.7195
Slc25a22	0.372593	5.05265	2.69767	0.0319094	0.7791	-3.72971
D17H6S56E-5	1.32836	8.70809	2.69739	0.0319219	0.7791	-3.63138
Pxdn	0.535756	6.25128	2.69257	0.032141	0.7791	-3.61929
Psma6	-0.303953	7.11563	-2.68753	0.0323715	0.7791	-3.61284
Fh1	-0.338732	6.30979	-2.68614	0.0324355	0.7791	-3.62393
Zfp60	-0.470008	6.10112	-2.68437	0.0325169	0.7791	-3.63626
Sgpl1	-0.358465	7.86015	-2.68169	0.0326408	0.7791	-3.62515
Mrps25	-0.44808	5.96425	-2.67947	0.0327439	0.7791	-3.64702
Gm15429	-0.339862	5.14737	-2.67831	0.0327978	0.7791	-3.73211
Nop2	-0.490106	6.56949	-2.67785	0.0328191	0.7791	-3.62349
Lrba	-0.367908	6.12543	-2.67647	0.0328835	0.7791	-3.63836
Fscn1	0.544425	7.71636	2.67363	0.0330166	0.7791	-3.62776
Slc25a5	-0.419874	8.56983	-2.67198	0.0330937	0.7791	-3.64361
Zadh2	-0.510463	5.32713	-2.67021	0.0331773	0.7791	-3.71579
Cyb5r4	-0.292593	6.32221	-2.66863	0.0332515	0.7791	-3.63378
Pabpc1	-0.33708	8.96905	-2.66773	0.033294	0.7791	-3.65425
Pde4dip	-0.534767	8.49452	-2.6523	0.0340322	0.7791	-3.65436
Cacybp	-0.323777	7.33013	-2.65168	0.0340624	0.7791	-3.63713
C530008M17Rik	0.317597	7.76036	2.65078	0.0341062	0.7791	-3.64262
Rprd1a	-0.383099	6.34119	-2.65028	0.0341305	0.7791	-3.64561
Ddr2	-0.636979	7.361	-2.64962	0.0341625	0.7791	-3.63955
Vdac3	-0.286834	7.50292	-2.6485	0.0342169	0.7791	-3.6409
Tbc1d23	0.540848	5.20324	2.64397	0.0344381	0.7791	-3.73741
Dvl1	0.353473	6.62103	2.6415	0.0345594	0.7791	-3.6416
Ssbp1	-0.297257	5.92924	-2.64097	0.0345853	0.7791	-3.6704
Sptbn1	0.432806	8.56351	2.6403	0.0346182	0.7791	-3.66268
Col11a1	-0.728826	5.71913	-2.63974	0.0346461	0.7791	-3.69561
Stk17b	-0.555961	5.95359	-2.63924	0.0346705	0.7791	-3.67393
Asnsd1	-0.433449	5.58095	-2.63828	0.0347182	0.7791	-3.70296
Rgma	0.880082	5.56382	2.63814	0.0347249	0.7791	-3.70334
Anp32a	-0.325615	8.58705	-2.63391	0.0349348	0.7791	-3.66723
Mlec	-0.380226	7.9278	-2.63338	0.034961	0.7791	-3.65635
Saal1	-0.309553	5.63379	-2.63282	0.0349891	0.7791	-3.69882
Atp9a	0.487261	7.05738	2.62057	0.035605	0.7791	-3.6543
Hax1	-0.374954	6.06257	-2.61614	0.0358305	0.7791	-3.67874
Grn	0.669327	5.83275	2.61424	0.0359277	0.7791	-3.69156
Pkig	0.500886	5.20693	2.61346	0.0359675	0.7791	-3.75337
Gnpat	-0.328631	6.95358	-2.61315	0.0359831	0.7791	-3.65957
Sfxn1	-0.502349	6.68156	-2.61227	0.0360283	0.7791	-3.66303
B4galt5	0.388048	5.06683	2.60872	0.0362115	0.7791	-3.77462
Cpsf1	0.332217	7.22163	2.60445	0.0364323	0.7791	-3.66556
Arhgef9	-0.360266	5.32649	-2.60386	0.0364633	0.7791	-3.74909
Cbx3	-0.349782	9.19499	-2.59881	0.0367271	0.7791	-3.70091
Ruvbl1	-0.417251	6.682	-2.59839	0.036749	0.7791	-3.67114
Cdh22	-1.01291	5.07542	-2.59582	0.0368841	0.7791	-3.81008
Tyw1	-0.385022	5.30261	-2.59391	0.0369848	0.7791	-3.75817
Obscn	2.70691	6.49862	2.59386	0.036987	0.7791	-3.71861
Smc2	-0.489782	9.02823	-2.59128	0.0371236	0.7791	-3.7022
Zkscan3	-0.593496	7.1522	-2.58999	0.0371924	0.7791	-3.67598
Aldh5a1	-0.418035	5.3951	-2.58806	0.0372948	0.7791	-3.75132
Prps1l3	-0.534048	5.08043	-2.58789	0.0373038	0.7791	-3.79525
Itm2b	0.415212	7.96804	2.58544	0.0374347	0.7791	-3.68685
Ankhd1	-0.270547	7.19472	-2.5838	0.0375224	0.7791	-3.67914
Btbd9	0.336044	5.64066	2.57869	0.0377975	0.7791	-3.72601
Neurod1	1.18988	7.85287	2.57799	0.037835	0.7791	-3.6906
Tmem256	-0.557642	5.47633	-2.57372	0.0380668	0.7791	-3.75399
Cabin1	0.28787	6.42829	2.57088	0.0382214	0.7791	-3.68981
Gria3	-0.530348	5.15615	-2.56674	0.0384483	0.7791	-3.79595
S100pbp	-0.557789	5.68341	-2.56646	0.0384638	0.7791	-3.73828
Dnaja3	-0.503581	5.36659	-2.56431	0.0385823	0.7791	-3.76989
Stip1	-0.288735	7.79875	-2.56361	0.038621	0.7791	-3.69854
Cycs	-0.443317	6.59612	-2.55567	0.0390622	0.7791	-3.69995
Ube2d3	-0.284325	8.2279	-2.55353	0.039182	0.7791	-3.71124
Rab5a	0.44489	6.01755	2.55208	0.0392633	0.7791	-3.71717
Tom1l1	0.566734	6.42833	2.54931	0.039419	0.7791	-3.70448
Eif3e	-0.336093	7.79393	-2.54775	0.0395074	0.7791	-3.70865
Dcp2	-0.275417	6.93863	-2.54722	0.0395372	0.7791	-3.7018
Fkbp3	-0.435429	6.99826	-2.54544	0.0396379	0.7791	-3.70362
Zfp637	-0.478556	5.56639	-2.53997	0.0399498	0.7791	-3.76267
Golt1b	-0.270218	6.00564	-2.53816	0.0400533	0.7791	-3.72905
M6pr	-0.342353	6.70719	-2.53787	0.0400698	0.7791	-3.70921
2700060E02Rik	-0.271152	7.06745	-2.53471	0.0402516	0.7791	-3.71017
Tmod2	-0.262731	7.77546	-2.52997	0.0405261	0.7791	-3.71977
Cul1	-0.314097	7.8087	-2.52714	0.0406909	0.7791	-3.72206
Zfp322a	-0.56409	5.4248	-2.52676	0.0407128	0.7791	-3.7864
Bms1	-0.317969	7.12472	-2.52534	0.0407961	0.7791	-3.71663
Sema4g	0.554295	5.01469	2.5243	0.040857	0.7791	-3.82863
Bcl2l1	0.461141	6.40587	2.5238	0.040886	0.7791	-3.72101
Pdk3	-0.32633	5.20673	-2.51857	0.0411939	0.7791	-3.81101
Dcun1d1	-0.353938	5.90993	-2.51813	0.0412199	0.7791	-3.74794
Ptcd3	-0.27887	6.78651	-2.51793	0.0412315	0.7791	-3.72124
Chtf8	-0.309224	7.46151	-2.51399	0.041465	0.7791	-3.72655
Ttbk1	0.408905	6.09946	2.51296	0.0415265	0.7791	-3.73796
Ube2q2	-0.307498	5.94523	-2.51056	0.0416698	0.7791	-3.75012
H2afy2	-0.347857	6.58792	-2.50547	0.0419748	0.7791	-3.73177
Immt	-0.311131	7.97207	-2.50049	0.0422762	0.7791	-3.7414
Otx1	-0.34642	7.51882	-2.49861	0.0423902	0.7791	-3.73718
Map3k13	1.00047	5.1538	2.49538	0.0425874	0.7791	-3.83304
Syt12	-1.05358	5.36571	-2.49258	0.0427589	0.7791	-3.82778
1110004F10Rik	-0.269176	7.26091	-2.48755	0.043069	0.7791	-3.74203
Bora	-0.315186	5.62589	-2.48631	0.0431455	0.7791	-3.78708
Psma4	-0.406784	7.71178	-2.48548	0.0431968	0.7791	-3.74788
Brwd3	-0.306453	6.28455	-2.4784	0.0436384	0.7791	-3.75594
Rbm4	-0.353973	5.41028	-2.47337	0.0439555	0.7791	-3.81486
Crim1	-0.341823	5.51485	-2.47325	0.043963	0.7791	-3.80474
Prrc2a	0.310575	9.2677	2.47202	0.0440404	0.7791	-3.78027
Cul9	0.456753	5.45827	2.47118	0.0440937	0.7791	-3.80688
Plxna2	0.656325	5.4382	2.46996	0.044171	0.7791	-3.8113
Xylt2	-0.385208	6.45704	-2.468	0.0442956	0.7791	-3.75891
Shf	0.621134	6.21662	2.46789	0.0443025	0.7791	-3.76342
Plxna1	-0.78232	5.85639	-2.46551	0.0444544	0.7791	-3.79122
Cops7a	-0.475174	6.12976	-2.46544	0.0444592	0.7791	-3.77172
Sri	-0.376666	5.21316	-2.46245	0.0446509	0.7791	-3.84274
Zbtb22	0.437672	5.49022	2.45801	0.0449367	0.7791	-3.81175
Ddx47	-0.337098	6.40328	-2.4481	0.0455822	0.7791	-3.77262
Kif3b	0.34164	6.30171	2.44309	0.0459118	0.7791	-3.77591
Adh5	-0.272822	7.23875	-2.43962	0.0461419	0.7791	-3.77342
Srp14	0.297262	5.95354	2.43569	0.0464034	0.7791	-3.79397
En2	-0.264264	5.48764	-2.43507	0.046445	0.7791	-3.82897
Vps16	0.288464	6.45909	2.43392	0.0465219	0.7791	-3.77838
Uba3	-0.394214	6.86994	-2.43194	0.0466546	0.7791	-3.77798
Rmnd5b	0.418748	5.07528	2.4292	0.0468391	0.7791	-3.87192
Fam126a	-0.376629	6.09387	-2.42771	0.0469398	0.7791	-3.79633
Med15	0.320345	6.03276	2.4272	0.0469746	0.7791	-3.79566
Kctd6	-0.330891	5.11869	-2.42523	0.047108	0.7791	-3.87409
Pramef8	0.331042	5.08921	2.42517	0.0471122	0.7791	-3.87221
Zfyve27	0.36303	5.3704	2.42499	0.0471244	0.7791	-3.84218
Trmt1	0.324103	5.81941	2.42112	0.0473878	0.7791	-3.81055
Suclg1	-0.48853	6.53014	-2.41865	0.0475566	0.7791	-3.79079
Pgls	-0.303904	6.11523	-2.41742	0.0476411	0.7791	-3.80142
Fdps	-0.324407	7.21893	-2.41336	0.0479204	0.7791	-3.79079
Bzrap1	1.55854	6.03121	2.41315	0.0479351	0.7791	-3.82036
Adck5	1.83858	5.13872	2.41312	0.0479369	0.7791	-3.91154
Ssb	-0.309095	7.82612	-2.4126	0.047973	0.7791	-3.79678
Hat1	-0.410192	6.19837	-2.40701	0.048361	0.7791	-3.80615
Csrp1	0.455574	7.54353	2.40466	0.0485253	0.7791	-3.79882
Nrde2	0.401211	5.08081	2.40399	0.048572	0.7791	-3.88534
Calcoco1	0.47045	5.63313	2.40307	0.0486371	0.7791	-3.83434
Cerk	-0.328436	7.61914	-2.40303	0.0486395	0.7791	-3.80087
Mrpl42	-0.355645	5.71955	-2.40157	0.0487417	0.7791	-3.83285
Cdca2	-0.371651	6.45296	-2.40157	0.0487422	0.7791	-3.80251
Gpcpd1	0.416473	5.31192	2.40133	0.0487592	0.7791	-3.862
Dynll1	-0.331873	7.9471	-2.39971	0.0488728	0.7791	-3.8067
Naa10	-0.303563	6.2006	-2.39954	0.048885	0.7791	-3.80989
Ppa1	-0.321743	6.72807	-2.39806	0.0489897	0.7791	-3.80083
Thoc5	-0.269506	5.70527	-2.39501	0.0492057	0.7791	-3.8368
Bbx	-0.305034	6.55827	-2.394	0.0492771	0.7791	-3.80524
Gtf2i	-0.306674	8.09152	-2.39328	0.0493285	0.7791	-3.81267
Actl6a	-0.261209	6.79675	-2.39298	0.0493496	0.7791	-3.80358
Itm2c	0.30726	6.21095	2.3915	0.0494553	0.7791	-3.81229
Cirbp	0.412427	6.7831	2.39004	0.0495597	0.7791	-3.80472
Cops4	-0.294864	6.46019	-2.38919	0.0496204	0.7791	-3.80999
Pkn2	-0.499015	6.56568	-2.38696	0.0497803	0.7791	-3.8113
Gm9531	-0.455522	6.08339	-2.38244	0.0501062	0.7791	-3.82692
Chgb	0.786331	5.10599	2.37904	0.0503524	0.7791	-3.90033
Gbf1	-0.289993	6.63327	-2.3787	0.0503771	0.7791	-3.81445
Rbm7	-0.302135	5.72771	-2.37812	0.0504193	0.7791	-3.84624
Snx6	-0.283654	6.66448	-2.37586	0.0505839	0.7791	-3.81599
Commd3	-0.258335	6.08701	-2.37027	0.050994	0.7791	-3.83269
Zfp518b	-0.328411	6.17561	-2.37009	0.0510075	0.7791	-3.8302
Rad18	-0.3842	6.20235	-2.36342	0.0515014	0.7791	-3.83419
Asphd2	0.331053	5.91543	2.35423	0.0521891	0.7791	-3.84834
Ide	-0.282074	7.15028	-2.35406	0.0522019	0.7791	-3.82998
Mrps35	-0.438474	5.54238	-2.35262	0.0523111	0.7791	-3.877
Lgmn	0.538053	6.80689	2.35082	0.0524473	0.7791	-3.83122
Brd2	0.325121	8.41165	2.34767	0.0526867	0.7791	-3.84654
Mgat5b	1.32013	6.04588	2.34627	0.052793	0.7791	-3.85737
Tnrc6b	-0.245608	7.41881	-2.34295	0.053047	0.7791	-3.83906
Mrpl35	-0.416333	5.24065	-2.3429	0.0530506	0.7791	-3.90922
Ccndbp1	0.304263	5.01463	2.34149	0.0531589	0.7791	-3.9279
Mb21d2	-0.731986	6.79232	-2.34142	0.0531642	0.7791	-3.84087
C1qa	1.43979	5.31969	2.34083	0.0532097	0.7791	-3.91477
Cecr2	-0.430124	7.35562	-2.33799	0.053429	0.7791	-3.8422
Polr1a	-0.394819	7.09179	-2.336	0.0535831	0.7791	-3.84215
Rbms1	0.359106	6.69184	2.33233	0.0538676	0.7791	-3.84383
Gm15459	-0.456344	10.0955	-2.33229	0.0538708	0.7791	-3.88416
Ephb2	-0.443754	8.10875	-2.33147	0.0539348	0.7791	-3.85373
Lpin2	0.561393	8.2606	2.32473	0.0544628	0.7791	-3.85978
Cdca7	-0.473178	7.07412	-2.3231	0.0545917	0.7791	-3.85105
Wdr75	-0.336809	6.14342	-2.32264	0.0546281	0.7791	-3.86264
Aarsd1	-0.290969	5.42585	-2.32191	0.0546856	0.7791	-3.903
Gsdmd	0.46358	5.33474	2.32086	0.0547688	0.7791	-3.90805
Yes1	-0.409567	5.47955	-2.32082	0.0547719	0.7791	-3.901
Sap30	-0.408163	5.00326	-2.32035	0.0548093	0.7791	-3.94761
Mid1ip1	-0.469358	5.12632	-2.31964	0.0548655	0.7791	-3.93519
Gm4735	-0.571118	8.10165	-2.31708	0.0550693	0.7791	-3.86331
Idh3a	-0.27646	6.71874	-2.31609	0.0551485	0.7791	-3.85571
Wdr13	0.403831	5.7379	2.31599	0.0551565	0.7791	-3.88231
Rnd3	-0.484237	8.52719	-2.31378	0.0553329	0.7791	-3.87053
Rnf213	-1.4869	6.54619	-2.31336	0.0553661	0.7791	-3.87305
43715	-0.255148	7.76784	-2.31328	0.0553732	0.7791	-3.86206
Dhx36	-0.22923	6.99258	-2.3106	0.0555881	0.7791	-3.8587
Smc4	-0.334493	8.41986	-2.31044	0.0556006	0.7791	-3.87129
Foxp4	0.530318	5.4343	2.31008	0.0556302	0.7791	-3.9068
Ttc28	0.58544	6.8015	2.3089	0.0557249	0.7791	-3.85969
Zfp282	-0.389627	5.80697	-2.30871	0.0557406	0.7791	-3.8866
Mcm2	-0.342311	8.43307	-2.30821	0.0557803	0.7791	-3.87293
Pten	-0.291345	7.26877	-2.30786	0.055809	0.7791	-3.86175
Adamts1	0.648195	6.02738	2.30762	0.0558286	0.7791	-3.87501
Trim3	0.361035	5.29489	2.30672	0.0559011	0.7791	-3.91973
Ints6	-0.357424	5.24809	-2.30668	0.055904	0.7791	-3.92876
Nusap1	-0.344341	7.29154	-2.30555	0.0559955	0.7791	-3.86352
Tmem259	0.255841	6.46017	2.30543	0.0560054	0.7791	-3.86417
Sfswap	0.275263	6.24347	2.30505	0.0560364	0.7791	-3.86876
Higd1a	-0.409001	5.74328	-2.304	0.0561218	0.7791	-3.89354
Spg20	-0.430983	6.19611	-2.3032	0.0561867	0.7791	-3.87463
Morn4	0.715507	5.23107	2.30125	0.0563457	0.7791	-3.93112
Abca7	0.722278	5.56002	2.30001	0.0564468	0.7791	-3.90532
Xiap	-0.292986	6.57121	-2.29935	0.0565003	0.7791	-3.86844
Plrg1	-0.253897	6.04563	-2.29888	0.0565391	0.7791	-3.88102
Ubn2	-0.382436	7.30525	-2.29818	0.0565965	0.7791	-3.86865
Gpc2	0.327028	6.30019	2.29674	0.0567144	0.7791	-3.87303
Arhgap5	-0.314717	6.93316	-2.29399	0.0569405	0.7791	-3.87014
Rbm27	-0.287318	6.33094	-2.28838	0.0574055	0.7791	-3.87982
Ect2	-0.37915	7.44985	-2.28615	0.0575906	0.7791	-3.87771
Zfp191	-0.267396	6.45937	-2.28508	0.0576806	0.7791	-3.87949
Etv6	-0.47307	5.32536	-2.28501	0.0576858	0.7791	-3.93631
Zfp335	0.427807	5.5023	2.28359	0.0578047	0.7791	-3.91768
Zfp113	-0.306194	5.47072	-2.28169	0.0579637	0.7791	-3.92416
Plxnb2	-0.300552	9.44736	-2.28107	0.0580164	0.7791	-3.90484
Sord	-0.429189	5.22827	-2.27799	0.0582756	0.7791	-3.94875
Mthfd2	-0.717402	6.81144	-2.27771	0.0582994	0.7791	-3.88355
Cntnap1	-0.918328	6.75534	-2.27716	0.0583457	0.7791	-3.886
2810474O19Rik	-0.425947	6.26723	-2.27645	0.0584058	0.7791	-3.89042
Abhd17b	-0.300756	5.63157	-2.27464	0.0585595	0.7791	-3.91762
Cbfb	-0.392935	7.77573	-2.27122	0.0588503	0.7791	-3.89048
Pds5a	-0.298127	7.43156	-2.27117	0.0588539	0.7791	-3.88764
A930011O12Rik	0.397488	6.0406	2.26916	0.0590263	0.7791	-3.89903
Hspd1	-0.302873	8.82249	-2.26896	0.0590434	0.7791	-3.90372
Fut9	-0.376379	6.33702	-2.2669	0.0592191	0.7791	-3.89478
Clcc1	-0.362432	5.26054	-2.26615	0.0592834	0.7791	-3.95163
Aup1	-0.46827	5.81489	-2.26317	0.0595402	0.7791	-3.91635
Zfp330	-0.249245	5.55237	-2.26173	0.0596648	0.7791	-3.9303
Slitrk5	-0.482635	5.93942	-2.26132	0.0597002	0.7791	-3.91198
Rps6ka2	0.364603	5.98622	2.26077	0.0597478	0.7791	-3.90653
Tmsb4x	0.760567	10.6247	2.2582	0.0599711	0.7791	-3.94023
Ept1	-0.303945	5.79861	-2.25597	0.0601653	0.7791	-3.9202
Magi1	-0.495716	6.56877	-2.25551	0.0602051	0.7791	-3.89943
Lars	-0.364611	7.26217	-2.25464	0.0602808	0.7791	-3.89793
Ctsa	0.629304	6.45908	2.25422	0.0603182	0.7791	-3.89968
Rsf1	-0.275061	6.87535	-2.2495	0.0607319	0.7791	-3.90038
BC068157	0.398857	5.81646	2.24814	0.0608514	0.7791	-3.92206
Odf2	-0.273202	7.32495	-2.24806	0.0608587	0.7791	-3.90265
Zdhhc6	-0.445671	5.54825	-2.24767	0.0608929	0.7791	-3.94169
Fem1b	-0.362117	7.30622	-2.24031	0.0615468	0.7791	-3.90795
Fam120a	-0.556654	8.08749	-2.23988	0.0615851	0.7791	-3.91474
Canx	-0.308633	8.77007	-2.23981	0.0615913	0.7791	-3.92227
Vim	0.701291	7.38532	2.23743	0.0618043	0.7791	-3.91022
Pdrg1	0.406539	5.54735	2.23649	0.0618887	0.7791	-3.94415
Rrm1	-0.345252	8.33128	-2.23424	0.0620904	0.7791	-3.92091
5830417I10Rik	-0.272284	6.44523	-2.23173	0.0623175	0.7791	-3.91587
Celsr2	0.453076	8.01257	2.23143	0.0623445	0.7791	-3.91938
Hmgn3	-0.423558	5.48973	-2.23123	0.0623623	0.7791	-3.9557
Spc24	-0.324731	5.7224	-2.22977	0.0624946	0.7791	-3.9412
Grcc10	-0.596876	6.20512	-2.2297	0.0625008	0.7791	-3.92495
Fbrs	0.304021	5.24908	2.22686	0.0627585	0.7791	-3.97158
Rdx	-0.331912	8.24501	-2.22521	0.062909	0.7791	-3.92605
Nup35	-0.319612	5.38434	-2.22394	0.0630255	0.7791	-3.96635
Tprkb	-0.481747	5.88839	-2.22146	0.0632522	0.7791	-3.94018
C2cd5	-0.505013	6.63072	-2.22072	0.06332	0.7791	-3.92242
Fanci	-0.36173	5.11864	-2.22019	0.0633692	0.7791	-3.99163
Uchl5	-0.331359	5.12246	-2.21877	0.0634993	0.7791	-3.99164
Snrnp27	-0.484967	5.56158	-2.2183	0.0635426	0.7791	-3.95967
Gm26880	1.63208	9.94206	2.21824	0.0635487	0.7791	-3.95386
Aifm1	-0.426391	5.4296	-2.21821	0.0635515	0.7791	-3.96796
Cxadr	0.693517	6.03312	2.21526	0.0638243	0.7791	-3.93627
Irak1	-0.36354	6.4086	-2.21511	0.0638373	0.7791	-3.92828
Dcps	-0.30749	5.39263	-2.21495	0.0638523	0.7791	-3.97116
Ankrd13a	0.320411	7.01083	2.21349	0.0639881	0.7791	-3.92462
Draxin	-0.38167	8.79951	-2.21317	0.064018	0.7791	-3.94029
Seh1l	-0.2438	7.26603	-2.21065	0.064252	0.7791	-3.92787
Lyar	-0.350601	5.83739	-2.2093	0.0643785	0.7791	-3.9491
Ints8	-0.331781	6.28323	-2.20899	0.0644074	0.7791	-3.93471
Fbl	-0.248721	7.2815	-2.20658	0.0646331	0.7791	-3.93075
Rpl39-ps	-0.383504	5.67184	-2.20645	0.0646447	0.7791	-3.95952
Setd7	-0.3167	7.04438	-2.20455	0.0648234	0.7791	-3.93137
Cdc23	-0.295417	6.9311	-2.20445	0.0648327	0.7791	-3.93129
B3galnt2	-0.416989	5.25372	-2.20232	0.0650332	0.7791	-3.99103
Tmem147	-0.475967	5.46451	-2.19996	0.0652566	0.7791	-3.97748
Stoml2	-0.279731	6.53265	-2.19876	0.0653708	0.7791	-3.93725
Btg1	0.465543	6.30218	2.19871	0.0653753	0.7791	-3.93952
Cblb	0.247404	5.54581	2.1987	0.0653764	0.7791	-3.96802
Lrig3	-0.330438	6.97126	-2.19661	0.0655749	0.7791	-3.93678
Ankrd17	-0.235556	7.57049	-2.19619	0.0656148	0.7791	-3.93964
Ccna2	-0.375562	8.48933	-2.19575	0.0656567	0.7791	-3.94839
Pkd1	0.454914	7.32769	2.19515	0.065714	0.7791	-3.93862
Tpgs2	-0.292609	5.0126	-2.19324	0.0658965	0.7791	-4.01632
Iars2	-0.343597	6.15709	-2.19135	0.0660775	0.7791	-3.94975
Ralgps1	0.424581	5.76122	2.18821	0.0663794	0.7791	-3.96384
Hiat1	-0.33275	5.79178	-2.18818	0.0663821	0.7791	-3.96483
Bcat1	-0.454976	7.76437	-2.18779	0.0664192	0.7791	-3.947
Kcmf1	-0.322061	6.64169	-2.18523	0.0666667	0.7791	-3.94571
Zgpat	0.264086	5.63899	2.18437	0.0667501	0.7791	-3.97203
2700029M09Rik	-0.253771	5.93446	-2.18373	0.0668125	0.7791	-3.96126
Timm8a1	-0.342965	5.81884	-2.1829	0.0668929	0.7791	-3.96715
Brsk1	0.582492	6.52088	2.18209	0.0669716	0.7791	-3.94806
Tmem43	-0.276584	5.79152	-2.18193	0.0669873	0.7791	-3.96841
Rpf1	-0.256756	5.06654	-2.18169	0.0670108	0.7791	-4.01734
Dstn	0.376418	8.46363	2.17951	0.0672231	0.7791	-3.95889
Cul2	-0.243718	5.85317	-2.17939	0.067234	0.7791	-3.9672
Uspl1	0.244727	5.78814	2.17936	0.0672379	0.7791	-3.96823
Amer2	-0.679705	5.91301	-2.17619	0.0675476	0.7791	-3.97114
Ccdc43	-0.310842	5.46794	-2.17529	0.067636	0.7791	-3.99058
Txnip	0.548169	6.14412	2.17424	0.0677394	0.7791	-3.95992
Eri2	-0.354074	5.77805	-2.17389	0.0677733	0.7791	-3.97497
Ep300	-0.287039	6.87907	-2.17359	0.0678025	0.7791	-3.95255
Brd4	0.277035	7.29336	2.17074	0.0680837	0.7791	-3.95518
Adamts14	-0.527702	6.08838	-2.16802	0.068354	0.7791	-3.9689
Syp	0.312016	6.23726	2.16564	0.0685899	0.7791	-3.96314
Clip1	-0.497333	5.08262	-2.16559	0.0685957	0.7791	-4.0287
Nfe2l1	-0.482475	7.3847	-2.16527	0.0686276	0.7791	-3.95996
Wnt4	-1.00895	5.88754	-2.1629	0.0688639	0.7791	-3.98597
Zswim8	0.300463	7.15985	2.15879	0.0692759	0.7791	-3.96282
Bmi1	-0.378381	7.58956	-2.15729	0.0694269	0.7791	-3.96654
Acap3	0.306755	5.85707	2.15561	0.069597	0.7791	-3.98108
Tmem70	-0.267345	5.13563	-2.1551	0.0696485	0.7791	-4.02697
Grb2	0.254059	6.17965	2.15507	0.0696508	0.7791	-3.97159
Psmd6	-0.271449	6.74506	-2.15433	0.0697259	0.7791	-3.96618
Nsf	-0.257639	5.93855	-2.1537	0.0697902	0.7791	-3.98109
Smurf1	0.365183	5.53915	2.15286	0.0698756	0.7791	-3.99771
Ddr1	0.42281	6.49796	2.15268	0.0698933	0.7791	-3.96818
Gdi1	0.302656	7.46603	2.15254	0.0699078	0.7791	-3.96875
Ncapg	-0.368617	6.95769	-2.15248	0.0699138	0.7791	-3.96732
Commd1	-0.24287	5.57919	-2.15141	0.0700229	0.7791	-3.99847
Sephs2	-0.360949	5.1611	-2.1507	0.0700945	0.7791	-4.02858
Larp4	-0.301771	6.99278	-2.15068	0.0700962	0.7791	-3.96844
Stag2	-0.299471	7.80986	-2.14992	0.0701736	0.7791	-3.97314
Atp6v1f	0.63784	6.10044	2.14714	0.0704585	0.7791	-3.97976
Cct5	-0.250608	8.72873	-2.14665	0.070508	0.7791	-3.98377
Prr3	0.372998	5.16161	2.14641	0.0705326	0.7791	-4.02709
Eif3c	-0.241003	8.39833	-2.14603	0.0705717	0.7791	-3.98088
Tbl2	-0.288902	5.84608	-2.14562	0.0706132	0.7791	-3.99005
Rap1a	-0.269837	5.92588	-2.14386	0.0707945	0.7791	-3.98816
Ppp1r18	0.372999	6.17978	2.14373	0.0708083	0.7791	-3.97937
Appl2	0.423683	6.01251	2.14275	0.0709091	0.7791	-3.98453
Spcs2	-0.334118	6.70385	-2.14244	0.070941	0.7791	-3.97482
Mkl1	0.347564	5.01776	2.14234	0.0709509	0.7791	-4.04156
Prmt7	-0.263133	5.87143	-2.1416	0.0710268	0.7791	-3.99157
Bmpr2	-0.314992	5.58235	-2.14158	0.0710291	0.7791	-4.0052
Rab14	-0.223825	7.1151	-2.13943	0.0712511	0.7791	-3.97635
Trap1	-0.254105	6.23181	-2.13937	0.0712575	0.7791	-3.98258
Rps27l	-0.398791	5.81812	-2.13879	0.0713176	0.7791	-3.99661
Pygb	0.410344	6.02039	2.13647	0.0715589	0.7791	-3.98851
Nr1h2	0.288687	5.9646	2.13646	0.0715593	0.7791	-3.99012
Cse1l	-0.307023	7.99406	-2.13555	0.071654	0.7791	-3.98444
Lman1	-0.334384	6.83958	-2.13219	0.0720044	0.7791	-3.98142
Ermp1	-0.309783	5.33052	-2.13148	0.0720794	0.7791	-4.02684
Soga1	0.472823	8.06782	2.13006	0.0722276	0.7791	-3.98868
Tmem63b	0.286123	6.52063	2.1298	0.072255	0.7791	-3.98364
Nell2	-0.557129	7.49324	-2.12825	0.0724183	0.7791	-3.98613
Krr1	-0.242579	6.13716	-2.12333	0.0729375	0.7791	-3.99557
Zfp866	-0.324381	5.66601	-2.12261	0.0730139	0.7791	-4.01319
Max	-0.293538	6.19389	-2.12229	0.0730482	0.7791	-3.99525
Gabbr1	0.401147	6.57638	2.1218	0.0730996	0.7791	-3.98883
Usp39	-0.285835	6.82171	-2.12085	0.0732003	0.7791	-3.98918
Atp8b2	0.345998	5.53385	2.12016	0.073274	0.7791	-4.0189
Kif5a	0.558074	6.74972	2.1199	0.0733022	0.7791	-3.98961
Blmh	-0.253735	7.15329	-2.11982	0.07331	0.7791	-3.99009
Poldip3	-0.224925	6.90138	-2.11956	0.0733379	0.7791	-3.98984
Lgals1	0.688627	5.7824	2.11768	0.0735384	0.7791	-4.01035
Lamp2	-0.296658	6.93798	-2.11764	0.0735425	0.7791	-3.9913
Rbm18	0.254256	6.45234	2.11746	0.0735618	0.7791	-3.99285
Rnf115	-0.232489	5.74343	-2.11711	0.0735996	0.7791	-4.01262
Cdca3	-0.446443	7.32885	-2.1155	0.0737723	0.7791	-3.994
Agap3	0.476318	6.7304	2.1143	0.0739011	0.7791	-3.99341
Prpf38a	-0.277091	6.08321	-2.11248	0.0740959	0.7791	-4.00448
Ppp1r16a	0.294794	5.02726	2.11213	0.074134	0.7791	-4.05828
Hspa8	-0.326685	10.1427	-2.1112	0.0742338	0.7791	-4.02472
Apex2	-0.908454	5.25796	-2.10983	0.0743823	0.7791	-4.05559
Rnf44	0.677198	6.70338	2.10831	0.0745471	0.7791	-3.99808
Drg1	-0.268923	6.52825	-2.10805	0.0745752	0.7791	-3.9997
Aatf	-0.289163	5.63896	-2.10801	0.0745796	0.7791	-4.02367
Vasp	0.559191	5.89865	2.10388	0.0750275	0.7791	-4.0146
Cttnbp2	0.649382	5.73061	2.10252	0.0751768	0.7791	-4.02218
Snx27	-0.246726	7.00678	-2.10214	0.0752174	0.7791	-4.00203
Nop58	-0.24748	7.63452	-2.10104	0.0753378	0.7791	-4.00549
Tspyl2	0.753487	7.32253	2.09975	0.0754791	0.7791	-4.0047
Gpr89	-0.293944	5.04651	-2.09934	0.0755251	0.7791	-4.06755
Ccne2	-0.420935	5.54565	-2.09927	0.0755325	0.7791	-4.03526
Src	0.335025	5.801	2.0989	0.0755725	0.7791	-4.02089
Tinf2	-0.271399	5.20635	-2.09731	0.0757474	0.7791	-4.05601
Set	-0.256372	8.85157	-2.09717	0.0757636	0.7791	-4.0182
Rbm10	-0.258176	6.83144	-2.0952	0.0759801	0.7791	-4.00692
Setd1a	0.25659	6.688	2.09495	0.0760072	0.7791	-4.00682
Trnt1	-0.330331	6.37185	-2.09311	0.0762112	0.7791	-4.01216
C1qc	1.43003	5.31442	2.09258	0.0762695	0.7791	-4.06151
Rpl14-ps1	-0.434794	6.07785	-2.09257	0.0762706	0.7791	-4.01912
Lpgat1	-0.244312	6.90319	-2.09138	0.0764027	0.7791	-4.00948
Wnk1	-0.366976	8.62445	-2.09029	0.0765245	0.7791	-4.02071
2810004N23Rik	-0.293708	5.27997	-2.08941	0.0766218	0.7791	-4.05591
Orc5	-0.31469	5.10219	-2.08827	0.0767494	0.7791	-4.06973
Ano8	0.323499	5.60363	2.08825	0.0767513	0.7791	-4.03606
Rsrc2	-0.245952	6.94364	-2.08804	0.0767745	0.7791	-4.01181
Sclt1	-0.343853	5.19294	-2.08682	0.076911	0.7791	-4.06403
Elovl5	-0.40583	6.75968	-2.08479	0.0771378	0.7791	-4.01479
Lta4h	-0.416804	6.94213	-2.08307	0.0773315	0.7791	-4.01561
Pde1c	0.595055	7.49553	2.08255	0.0773895	0.7791	-4.01741
Mr1	-1.80094	5.03215	-2.08177	0.0774772	0.7791	-4.11851
Gm7292	0.328686	5.48608	2.08114	0.0775486	0.7791	-4.04635
Manbal	0.317382	5.19592	2.08017	0.0776576	0.7791	-4.0645
Sema6c	0.633379	5.51437	2.07965	0.0777168	0.7791	-4.04689
Cacul1	-0.33447	6.17804	-2.07846	0.0778505	0.7791	-4.0257
Srp72	-0.228332	7.0969	-2.07842	0.0778551	0.7791	-4.0187
Ldhb	-0.775012	6.25022	-2.0772	0.0779934	0.7791	-4.02843
Fosl2	-0.927414	6.75454	-2.07502	0.0782412	0.7791	-4.02417
Ppp6r2	-0.263126	5.62227	-2.07497	0.078247	0.7791	-4.04569
Map2k1	-0.235428	5.87179	-2.07409	0.0783472	0.7791	-4.0363
Top1	-0.232878	7.79906	-2.07383	0.078376	0.7791	-4.02534
Nol8	-0.280762	5.73626	-2.07329	0.0784384	0.7791	-4.04203
Spp1	1.28268	5.49172	2.0731	0.07846	0.7791	-4.05862
Pea15a	0.39796	6.70635	2.0727	0.0785056	0.7791	-4.02237
Trak1	0.416203	7.13279	2.07096	0.0787041	0.7791	-4.02377
Zfx	-0.457343	5.94264	-2.07018	0.0787928	0.7791	-4.03811
Iars	-0.482003	7.35019	-2.06987	0.078829	0.7791	-4.02579
Prim2	-0.359017	5.59447	-2.06985	0.0788306	0.7791	-4.05111
Rpl21-ps15	-0.649608	6.47704	-2.06871	0.0789614	0.7791	-4.02952
Zfp260	-0.395647	6.79432	-2.06859	0.0789752	0.7791	-4.02592
Tmem29	-1.075	5.35613	-2.06776	0.0790704	0.7791	-4.07736
Fam219a	0.463966	5.23859	2.06768	0.0790802	0.7791	-4.06953
Madd	0.298881	5.82813	2.06741	0.079111	0.7791	-4.04086
Ubqln2	-0.898868	8.6521	-2.06578	0.079299	0.7791	-4.03782
Kif21a	-0.219379	6.95542	-2.0624	0.0796888	0.7791	-4.02966
Mgll	0.424947	5.36326	2.06169	0.0797716	0.7791	-4.06549
Dgkd	0.54429	7.37888	2.06151	0.079792	0.7791	-4.0314
Rgl2	0.422672	6.37217	2.06114	0.0798353	0.7791	-4.03293
Ppid	-0.237533	6.84801	-2.06096	0.0798561	0.7791	-4.03072
Cpxm2	0.431279	5.16469	2.06068	0.0798888	0.7791	-4.0787
Amotl2	0.701024	5.85895	2.05996	0.0799724	0.7791	-4.04593
Chfr	-0.288208	5.6691	-2.05778	0.0802257	0.7791	-4.05496
Tdp1	-0.224897	5.57028	-2.05759	0.0802484	0.7791	-4.05905
Psma2	-0.335675	6.84793	-2.05722	0.0802914	0.7791	-4.03357
Tro	-0.875649	8.4734	-2.05661	0.0803624	0.7791	-4.04251
Edc4	0.222507	6.55045	2.05547	0.0804957	0.7791	-4.03509
Plxnb1	0.228587	6.54737	2.05526	0.0805204	0.7791	-4.03526
Ncoa7	0.466239	5.1066	2.05306	0.080778	0.7791	-4.08756
Cops3	-0.254969	6.62481	-2.05301	0.0807834	0.7791	-4.03713
Sez6l	0.777212	6.17502	2.05203	0.0808989	0.7791	-4.04349
Wdr62	0.293775	5.48253	2.05116	0.0810012	0.7791	-4.06569
0610007P14Rik	-0.528575	5.56501	-2.05106	0.0810134	0.7791	-4.06624
Ipo5	-0.323053	8.88587	-2.05098	0.081022	0.7791	-4.0496
Rtel1	0.300041	6.49266	2.05085	0.0810381	0.7791	-4.03875
Kif20a	-0.247028	7.48979	-2.05075	0.0810498	0.7791	-4.03952
Cog4	-0.31054	5.30424	-2.04932	0.0812174	0.7791	-4.07912
Klc2	0.360209	5.1025	2.04626	0.0815798	0.7791	-4.09158
Hip1	-0.421623	6.6306	-2.04547	0.0816739	0.7791	-4.04293
Fam102b	0.3826	5.80462	2.04472	0.0817629	0.7791	-4.05688
Setd5	-0.289159	8.40284	-2.04335	0.0819261	0.7791	-4.05069
Acat1	-0.257459	7.61591	-2.04018	0.0823034	0.7791	-4.04753
Prnp	0.493553	6.61209	2.03756	0.0826181	0.7791	-4.04743
Msl2	-0.238496	6.18861	-2.03725	0.0826544	0.7791	-4.05323
Ncapd3	-0.250204	6.55418	-2.0368	0.0827094	0.7791	-4.0489
Erdr1	1.15234	8.69657	2.03487	0.0829415	0.7791	-4.05896
Mtdh	-0.253483	7.24682	-2.03478	0.0829517	0.7791	-4.04963
Psme3	-0.273082	7.18897	-2.03278	0.0831938	0.7791	-4.05086
Eya3	-0.306184	5.78318	-2.03196	0.0832929	0.7791	-4.06776
Kif1a	0.680613	8.26215	2.03189	0.0833016	0.7791	-4.05744
Bin1	0.415778	6.90512	2.03184	0.0833066	0.7791	-4.05074
Tmx1	-0.260543	6.44125	-2.03166	0.0833292	0.7791	-4.05353
Cdc25c	-0.273814	5.25842	-2.03145	0.0833544	0.7791	-4.0927
Ccar1	-0.234995	7.52883	-2.03131	0.0833709	0.7791	-4.05323
Atrnl1	-0.45581	5.06359	-2.03003	0.083527	0.7791	-4.10878
Hsd17b4	-0.212075	6.5413	-2.02781	0.0837967	0.7791	-4.05515
Gm3764	0.296059	5.59605	2.02644	0.0839634	0.7791	-4.07658
Med24	0.225179	6.72685	2.02585	0.0840348	0.7791	-4.05503
Recql	-0.321968	5.3945	-2.02369	0.084299	0.7791	-4.09015
Paxbp1	0.402654	6.45883	2.02369	0.0842999	0.7791	-4.05807
Gm5641	-0.432309	8.13544	-2.02267	0.0844244	0.7791	-4.06297
Atp5c1	-0.259537	7.64871	-2.02191	0.0845181	0.7791	-4.06041
Senp6	-0.218224	6.88127	-2.02181	0.0845297	0.7791	-4.05806
Kif20b	-0.326101	6.29947	-2.02158	0.0845578	0.7791	-4.0626
Strc	0.659246	5.15609	2.0213	0.0845925	0.7791	-4.10428
Rexo1	0.22801	6.30487	2.021	0.0846293	0.7791	-4.06154
Stk25	0.579531	7.39636	2.02052	0.0846891	0.7791	-4.06008
Zfyve9	-0.239397	6.01974	-2.02042	0.0847003	0.7791	-4.0683
Ppp6c	-0.247271	6.42954	-2.01983	0.0847736	0.7791	-4.06183
Me1	0.553909	5.55632	2.01925	0.0848453	0.7791	-4.08344
Emc3	-0.305424	6.30221	-2.01875	0.0849063	0.7791	-4.06441
Abcf2	-0.257152	7.11267	-2.01822	0.0849725	0.7791	-4.06084
Sdhb	-0.211147	6.60834	-2.01799	0.0850006	0.7791	-4.06156
Lsm14a	-0.291532	7.18335	-2.01692	0.0851322	0.7791	-4.06196
Rtn4	0.252652	7.67341	2.01449	0.0854341	0.7791	-4.06561
Ddhd1	-0.256191	5.71103	-2.01267	0.0856595	0.7791	-4.08273
Tcea1	-0.286445	7.58263	-2.01264	0.085664	0.7791	-4.06653
Atp5h	-0.318523	6.96885	-2.01193	0.0857519	0.7791	-4.06514
Akap8l	0.313742	5.07159	2.01078	0.0858953	0.7791	-4.11486
Atg7	-0.409958	5.34704	-2.00893	0.0861268	0.7791	-4.10271
Thoc7	-0.275399	6.32209	-2.00893	0.086127	0.7791	-4.07079
Narf	-0.37733	5.83885	-2.00819	0.0862195	0.7791	-4.08217
Tada1	-0.250734	5.3707	-2.0071	0.0863555	0.7791	-4.10127
Snrpd3	-0.297924	6.53926	-2.00572	0.0865288	0.7791	-4.07084
Gm7488	-0.316761	6.02104	-2.00542	0.0865666	0.7791	-4.07885
2810417H13Rik	-0.360774	7.58867	-2.00475	0.0866514	0.7791	-4.07209
Ptplad1	-0.314339	7.27578	-2.00306	0.0868643	0.7791	-4.07196
Etf1	-0.274699	7.9106	-2.00131	0.0870852	0.7791	-4.07621
Vdac1	-0.230159	7.82563	-2.00109	0.0871127	0.7791	-4.07585
Tnk2	0.340613	6.67199	1.99898	0.0873797	0.7791	-4.07406
Actb	0.297702	11.0526	1.99887	0.0873944	0.7791	-4.10816
Casp2	-0.291641	7.23572	-1.99826	0.0874713	0.7791	-4.07517
Erp44	-0.235566	5.39054	-1.99791	0.0875162	0.7791	-4.10593
Baz1a	-0.406563	6.7278	-1.99686	0.0876496	0.7791	-4.0763
Map3k10	0.327879	5.93324	1.99684	0.0876525	0.7791	-4.08532
Hsdl1	0.315219	5.83587	1.99661	0.0876821	0.7791	-4.08807
Prr14l	-0.228685	6.60809	-1.99609	0.0877479	0.7791	-4.07692
Nudcd2	-0.310389	6.31103	-1.99606	0.0877516	0.7791	-4.08001
Gm8186	-0.430127	6.36313	-1.99566	0.0878023	0.7791	-4.08014
Fads2	-0.293774	6.57142	-1.99507	0.0878782	0.7791	-4.07804
Sh3glb2	0.283777	5.64375	1.99363	0.0880622	0.7791	-4.09625
Abcb7	-0.308505	6.0179	-1.99342	0.0880882	0.7791	-4.08703
Wbp2	0.316383	6.31293	1.99283	0.0881647	0.7791	-4.08103
Mrpl19	-0.327427	5.46236	-1.99059	0.0884515	0.7791	-4.10777
Mapk6	0.247262	7.75642	1.99053	0.0884587	0.7791	-4.08273
Dpy19l4	-0.32429	5.27333	-1.98875	0.0886877	0.7791	-4.11852
Ccnl2	0.295819	7.2508	1.98869	0.0886955	0.7791	-4.0817
Kctd10	0.24846	6.09559	1.98828	0.0887491	0.7791	-4.08755
Tsc2	0.36965	6.56099	1.98769	0.0888242	0.7791	-4.08246
Szt2	0.30523	6.14977	1.98758	0.0888394	0.7791	-4.08707
Cdk11b	0.222772	6.54905	1.98745	0.0888559	0.7791	-4.08268
Ppig	-0.230714	6.7019	-1.9869	0.0889267	0.7791	-4.08293
Gtf2h3	-0.269887	5.15391	-1.98669	0.0889538	0.7791	-4.1264
Usp9x	-0.204088	8.44729	-1.98458	0.0892272	0.7791	-4.09118
Dynlt1c	0.400846	5.22835	1.98325	0.0893996	0.7791	-4.12205
Robo1	-0.598589	6.85265	-1.981	0.0896915	0.7791	-4.08756
Dchs1	0.299841	6.97138	1.97967	0.0898652	0.7791	-4.0874
Nek7	-0.413188	5.34132	-1.97741	0.0901601	0.7791	-4.12259
Tax1bp3	0.256975	5.45962	1.97704	0.0902098	0.7791	-4.11434
Wasf3	0.618146	7.02608	1.97629	0.0903073	0.7791	-4.09
Tmem200c	0.750632	5.75627	1.976	0.090345	0.7791	-4.10546
Aurkaip1	-0.250982	5.15813	-1.97481	0.0905012	0.7791	-4.13315
Zbtb33	-0.282401	5.87401	-1.97345	0.0906806	0.7791	-4.10392
Vash1	0.355895	6.27282	1.97232	0.0908299	0.7791	-4.09583
Smcr8	-0.232229	6.07145	-1.97103	0.0910002	0.7791	-4.10085
Pa2g4	-0.259059	8.09894	-1.97042	0.0910807	0.7791	-4.0987
Ostc	-0.351598	6.34918	-1.97039	0.0910841	0.7791	-4.09748
Shisa2	-0.931194	5.26141	-1.97018	0.0911127	0.7791	-4.13847
Antxr2	0.410945	5.42962	1.96963	0.0911846	0.7791	-4.12058
Gm10123	-0.297568	10.1224	-1.969	0.0912688	0.7791	-4.11637
Tet3	-0.41532	8.19519	-1.96863	0.0913176	0.7791	-4.10057
Cbx1	-0.28233	7.41958	-1.96857	0.0913255	0.7791	-4.09659
Acd	0.390085	5.5624	1.96821	0.091373	0.7791	-4.11603
Tprgl	0.267101	5.99399	1.96711	0.091519	0.7791	-4.10411
Txnl1	-0.275052	6.86946	-1.96662	0.0915846	0.7791	-4.09689
Map2k4	-0.206068	6.33035	-1.96505	0.0917929	0.7791	-4.10087
Myo5a	-0.263749	7.96847	-1.96413	0.0919162	0.7791	-4.1023
Polr3e	-0.310028	5.72051	-1.9635	0.092	0.7791	-4.11521
43713	0.533023	6.43184	1.96291	0.092079	0.7791	-4.10093
Gapdh	-0.396458	10.7041	-1.96231	0.0921585	0.7791	-4.12712
Bcorl1	-0.304923	5.09471	-1.96171	0.0922387	0.7791	-4.14538
BC026590	-0.257551	5.54236	-1.96096	0.0923399	0.7791	-4.12293
Psmc6	-0.253456	7.22375	-1.95952	0.092533	0.7791	-4.10228
Trafd1	0.292161	5.60532	1.95802	0.0927342	0.7791	-4.12104
Glyr1	-0.210003	7.86496	-1.95503	0.093138	0.7791	-4.10804
Gm9747	-0.43586	6.02205	-1.95412	0.0932607	0.7791	-4.11436
Fbxo28	-0.258509	5.96297	-1.9538	0.0933045	0.7791	-4.11494
Piga	-0.676072	5.43448	-1.9535	0.0933445	0.7791	-4.13613
Gm14494	-0.285115	5.38811	-1.95318	0.0933888	0.7791	-4.1347
Celf3	0.787538	5.24744	1.95253	0.0934771	0.7791	-4.14198
Zfp275	-0.442276	6.30874	-1.95187	0.0935659	0.7791	-4.11121
Ndor1	0.259287	5.59344	1.95089	0.0936993	0.7791	-4.12611
Prr11	-0.22962	6.20219	-1.94969	0.0938634	0.7791	-4.1133
Ndufc2	-0.33382	6.07355	-1.94958	0.0938783	0.7791	-4.11592
Nabp2	-0.201003	6.31326	-1.94922	0.0939263	0.7791	-4.11205
E2f3	-0.341375	6.03522	-1.94801	0.0940912	0.7791	-4.11774
Gm14680	-1.18927	7.0164	-1.94674	0.094266	0.7791	-4.11317
Ash1l	-0.274256	7.65431	-1.94508	0.0944921	0.7791	-4.11397
Efr3a	-0.255437	6.42009	-1.94404	0.094636	0.7791	-4.11475
Asxl1	0.29696	7.3592	1.94308	0.0947673	0.7791	-4.11408
Pkd2	-0.319751	6.26359	-1.94144	0.0949937	0.7791	-4.11848
Pld1	0.783598	6.13332	1.94137	0.0950027	0.7791	-4.12018
Plekho2	-0.667034	8.11456	-1.94085	0.0950752	0.7791	-4.11939
Furin	0.354617	5.00618	1.94076	0.0950864	0.7791	-4.16081
Rps6ka3	-0.54177	7.81476	-1.93851	0.095398	0.7791	-4.1194
Micall1	0.458179	5.68018	1.93828	0.0954294	0.7791	-4.13182
Tnfrsf21	0.288057	5.37923	1.93754	0.0955322	0.7791	-4.14311
Dixdc1	0.372662	6.23212	1.93753	0.0955342	0.7791	-4.12051
C1qb	1.34797	5.1373	1.93679	0.0956361	0.7791	-4.16445
Tmem18	-0.344913	5.00849	-1.93667	0.0956529	0.7791	-4.16605
Atg16l1	0.549288	5.69479	1.93541	0.0958274	0.7791	-4.13354
Mis12	-0.275451	5.85105	-1.93376	0.0960582	0.7791	-4.13117
Astn1	-0.338466	5.98655	-1.93308	0.0961531	0.7791	-4.12887
Mtap	-0.244877	5.9588	-1.93259	0.0962214	0.7791	-4.1294
Itsn1	0.395105	7.42082	1.93175	0.0963383	0.7791	-4.12227
Stam	-0.241247	6.25541	-1.93152	0.0963699	0.7791	-4.12518
Dennd6a	-0.380239	5.52386	-1.93142	0.0963839	0.7791	-4.14352
Ddah2	0.633953	8.20657	1.93131	0.0963994	0.7791	-4.12631
Ubl3	0.367329	6.00028	1.93119	0.0964164	0.7791	-4.12858
Lrrc45	0.266577	5.41822	1.92815	0.0968425	0.7791	-4.14746
Psmd14	-0.26674	6.85246	-1.92753	0.0969304	0.7791	-4.1244
Ablim2	0.474831	5.41553	1.92716	0.0969823	0.7791	-4.14843
Ppp1r14c	0.772372	5.65696	1.9267	0.0970468	0.7791	-4.14142
Rfwd3	-0.267556	7.34384	-1.9256	0.0972014	0.7791	-4.12645
Gtf2ird1	0.243142	6.22974	1.92555	0.0972089	0.7791	-4.12884
Atp5f1	-0.265199	7.68597	-1.9247	0.0973278	0.7791	-4.12834
Sema4c	0.322955	5.26346	1.92435	0.0973773	0.7791	-4.1567
Pdha1	-0.687168	8.53217	-1.92353	0.0974934	0.7791	-4.1337
Nova2	0.367271	5.90757	1.92256	0.0976307	0.7791	-4.13637
Snw1	-0.282539	6.57285	-1.9223	0.0976683	0.7791	-4.12897
Gm21897	0.26758	5.68474	1.92144	0.0977895	0.7791	-4.14267
Pdcd10	-0.270791	5.41437	-1.92078	0.0978832	0.7791	-4.15402
Slc38a1	-0.278766	8.27756	-1.92011	0.0979791	0.7791	-4.13447
Tars	-0.380322	7.2476	-1.9186	0.0981929	0.7791	-4.13118
Mrpl53	-0.336929	5.10605	-1.91779	0.0983092	0.7791	-4.17132
Ndufa12	-0.309396	6.09238	-1.91765	0.0983294	0.7791	-4.13739
Stmn2	0.903412	7.81044	1.91747	0.0983537	0.7791	-4.13398
Sacs	-0.499988	9.19465	-1.9154	0.0986505	0.7791	-4.14357
Znrf1	0.28848	6.18798	1.91434	0.0988013	0.7791	-4.13714
Yy2	-0.907104	5.28871	-1.91425	0.0988145	0.7791	-4.17095
Ube2e1	-0.251214	6.27093	-1.91419	0.0988231	0.7791	-4.13705
Neurl4	0.25092	6.84885	1.91295	0.0990005	0.7791	-4.13433
Adsl	-0.25216	6.14159	-1.9121	0.0991235	0.7791	-4.1402
Zfand3	0.365598	6.2201	1.91194	0.0991461	0.7791	-4.13843
Tbc1d9	0.349504	5.72673	1.9118	0.0991666	0.7791	-4.14797
Psmb5	-0.237265	6.6056	-1.91172	0.0991783	0.7791	-4.13614
Pcyox1	-0.275108	7.10792	-1.91171	0.0991787	0.7791	-4.13566
Pwp1	-0.269783	5.90571	-1.91162	0.0991917	0.7791	-4.14484
Mnt	0.364832	5.36473	1.91135	0.0992312	0.7791	-4.16041
Cadm1	-0.342879	7.61781	-1.90847	0.0996461	0.7791	-4.13943
Snapc4	0.259638	5.67964	1.90805	0.0997075	0.7791	-4.15172
Gm26905	0.230327	8.17528	1.90714	0.0998386	0.7791	-4.14281
Zc3hav1	-0.644747	6.22516	-1.90622	0.0999726	0.7791	-4.14479
