# Supplementary material for: Cancer Stem Cells, not Bulk Tumor Cells, Determine Mechanisms of Resistance to SMO Inhibitors
Source: Cancer Res Commun. 2022 Jun 6;2(6):402–16. doi: 10.1158/2767-9764.CRC-22-0124 (PMC9853917; doi:10.1158/2767-9764.CRC-22-0124)
Supplement: Supplementary Table 9 — Differentially expressed proteins in LDE vs. control treated Ptch;p53 SI-CSC and SD-CSC tumors [file crc-22-0124-s08.xlsx]

## Sheet: Sheet1
Supplementary Table 9. The relative amount of recovered Gene Protein Products from label free global proteome profiling
		iFOT
		Control					LDE
GeneID	GeneSymbol	LPP7	LPP8	LPP12	LPP13	LPP14	LPP9	LPP10	LPP15	LPP16
14264	Fmod	5e-05	5e-05	5e-05	5e-05	5e-05	1.8	3.5	9.5	5.3
18295	Ogn	5e-05	5e-05	5e-05	5e-05	5e-05	0.89	2.8	8.9	0.98
11595	Acan	5e-05	5e-05	5e-05	5e-05	5e-05	0.74	0.1	0.54	2.1
57778	Fmnl1	5e-05	5e-05	5e-05	5e-05	5e-05	1.1	0.09	0.13	1.5
13830	Stom	5e-05	5e-05	5e-05	5e-05	5e-05	0.25	0.08	1.5	0.26
19703	Renbp	5e-05	5e-05	5e-05	5e-05	5e-05	0.18	0.05	0.22	0.28
63913	Fam129a	5e-05	5e-05	5e-05	5e-05	5e-05	0.03	0.02	0.25	0.29
71355	Col24a1	5e-05	5e-05	5e-05	5e-05	5e-05	0.17	0.14	0.02	0.004
13527	Dtna	5e-05	5e-05	5e-05	5e-05	5e-05	0.1	0.02	0.12	0.06
19309	Pygm	5e-05	5e-05	0.03	5e-05	5e-05	12.9	0.21	6	0.02
17884	Myh4	0.04	5e-05	0.21	5e-05	0.03	42.9	0.04	130	0.75
17879	Myh1	0.04	5e-05	5e-05	0.55	0.03	250	0.04	110	0.76
68794	Flnc	0.007	0.02	5e-05	0.003	5e-05	6.1	0.02	6.9	0.009
224794	Enpp4	5e-05	5e-05	5e-05	5e-05	5e-05	0.008	0.009	0.04	0.02
238011	Enpp7	5e-05	5e-05	5e-05	5e-05	5e-05	0.008	0.009	0.04	0.02
116847	Prelp	0.2	5e-05	5e-05	0.05	0.07	3.9	3	79.4	7.6
18452	P4ha2	5e-05	5e-05	5e-05	0.007	5e-05	0.16	0.52	0.25	0.24
17183	Matn4	5e-05	5e-05	5e-05	5e-05	0.04	0.55	0.35	2.7	2.7
66695	Aspn	5e-05	0.1	5e-05	0.08	0.03	2.3	0.55	24.4	1.4
107581	Col16a1	5e-05	5e-05	0.009	5e-05	5e-05	1	0.01	0.03	0.03
15951	Ifi204	5e-05	5e-05	5e-05	0.003	5e-05	0.004	0.009	0.18	0.16
56174	Nagk	5e-05	5e-05	5e-05	5e-05	0.02	0.03	0.13	1.2	0.81
68588	Cthrc1	5e-05	5e-05	5e-05	5e-05	0.05	0.36	0.57	0.17	3.4
67399	Pdlim7	5e-05	5e-05	0.02	5e-05	5e-05	0.08	0.008	1.6	0.06
21810	Tgfbi	5e-05	5e-05	0.03	0.01	0.06	0.37	0.88	5.5	1.6
94180	Acsbg1	0.03	5e-05	5e-05	5e-05	5e-05	0.12	0.1	1.2	0.97
12496	Entpd2	5e-05	5e-05	5e-05	0.03	0.04	0.26	0.37	1.2	3.7
20198	S100a4	5e-05	5e-05	0.08	0.17	0.61	2.1	7	35.2	21.9
12824	Col2a1	0.11	0.03	5e-05	5e-05	5e-05	2.2	0.68	3.1	4.5
11717	Ampd3	5e-05	5e-05	5e-05	5e-05	0.03	0.18	0.15	0.58	0.72
216616	Efemp1	5e-05	5e-05	0.02	0.06	0.09	0.33	0.4	6.8	0.82
17913	Myo1c	0.01	0.02	0.03	5e-05	0.04	0.13	0.17	3.7	0.61
80898	Erap1	0.01	5e-05	5e-05	5e-05	0.004	0.02	0.09	0.29	0.23
19659	Rbp1	0.33	5e-05	5e-05	5e-05	5e-05	0.81	1.5	10	1.6
14469	Gbp2	5e-05	5e-05	0.03	0.05	5e-05	0.11	0.15	1.3	1.6
259300	Ehd2	5e-05	5e-05	0.05	0.05	0.09	0.08	0.24	5.5	0.87
66447	Mgst3	0.04	5e-05	5e-05	5e-05	5e-05	0.39	0.36	0.26	0.37
74145	F13a1	0.09	0.22	5e-05	0.25	5e-05	1.6	0.98	15.5	0.67
108075	Ltbp4	5e-05	5e-05	5e-05	0.01	0.01	0.09	0.13	0.42	0.006
216188	Aldh1l2	0.01	0.02	0.01	0.03	0.1	3.5	0.24	0.69	0.95
12819	Col15a1	5e-05	5e-05	0.05	5e-05	0.02	0.29	0.005	1.6	0.26
78688	Nol3	5e-05	5e-05	0.09	0.03	0.05	1.2	0.47	1.5	2
13003	Vcan	0.004	5e-05	0.005	5e-05	0.13	1	0.21	1.7	1.3
100041194	Ahnak2	0.01	5e-05	0.11	0.11	0.13	0.96	1.2	7.7	0.88
433375	Creg1	0.04	5e-05	5e-05	5e-05	5e-05	0.08	0.07	0.8	0.19
13132	Dab2	5e-05	5e-05	0.03	0.05	0.08	0.08	0.48	2.9	0.86
223650	Eppk1	5e-05	5e-05	5e-05	0.02	5e-05	0.05	0.01	0.36	0.12
320119	Rps6kc1	0.2	0.07	5e-05	0.02	5e-05	2	1.6	2.2	1.7
243834	Zfp324	5e-05	5e-05	5e-05	5e-05	0.05	0.93	0.07	0.22	0.07
93695	Gpnmb	0.07	5e-05	5e-05	5e-05	0.12	0.56	0.61	1.3	2.3
13040	Ctss	5e-05	5e-05	0.14	5e-05	0.27	0.53	1.7	5.3	2.7
16779	Lamb2	5e-05	5e-05	0.06	5e-05	5e-05	0.23	0.03	1.1	0.13
110058	Syt17	5e-05	5e-05	0.04	5e-05	0.02	0.15	0.23	0.93	0.17
52055	Rab11fip5	0.01	5e-05	5e-05	0.005	0.006	0.03	0.06	0.35	0.07
21960	Tnr	5e-05	5e-05	5e-05	5e-05	0.43	2.3	0.13	4.4	3.4
16854	Lgals3	0.13	0.18	0.27	0.2	0.17	0.69	6.3	13.7	1.6
57344	As3mt	0.04	5e-05	5e-05	5e-05	5e-05	0.16	0.04	0.26	0.48
14118	Fbn1	0.02	0.004	0.05	0.02	0.11	0.51	0.21	3.8	0.23
23876	Fbln5	0.08	0.04	5e-05	5e-05	0.51	1.1	0.91	10.6	1.9
235505	Cd109	0.009	0.01	0.01	0.03	0.01	0.24	0.21	0.45	0.61
269823	Pon3	5e-05	5e-05	5e-05	0.07	0.05	0.03	0.23	1.9	0.46
320563	Islr2	5e-05	0.04	5e-05	5e-05	0.05	0.13	0.84	0.23	0.63
70911	Phyhipl	5e-05	5e-05	5e-05	5e-05	0.19	0.41	0.49	1.3	1.5
11636	Ak1	0.04	5e-05	5e-05	0.61	0.98	10	2.7	15.5	1.8
12554	Cdh13	0.01	5e-05	0.05	5e-05	0.07	0.03	0.21	1.8	0.28
16426	Itih3	0.53	0.73	0.36	0.38	0.96	16.7	5.2	20.7	6.8
98932	Myl9	5e-05	5e-05	5e-05	0.26	0.49	2.4	4.2	5.1	0.23
77559	Agl	0.01	0.02	0.003	5e-05	0.003	0.14	0.02	0.25	0.15
12111	Bgn	2.9	0.59	1.5	3	5.1	22.1	24.8	128	21.1
64294	Itm2c	5e-05	5e-05	5e-05	5e-05	0.1	0.19	0.23	0.47	0.6
246228	Vwa1	5e-05	5e-05	0.02	5e-05	0.08	0.18	0.42	0.75	0.13
17436	Me1	0.14	0.11	0.07	0.21	0.23	1.1	1.7	3.4	4.9
330908	Opcml	5e-05	5e-05	5e-05	5e-05	0.23	0.83	0.37	0.26	1.9
17304	Mfge8	5e-05	0.03	5e-05	5e-05	5e-05	0.05	0.08	0.12	0.19
12816	Col12a1	0.98	0.28	0.56	0.22	2.2	7	11.6	37.1	4.6
12380	Cast	5e-05	5e-05	0.06	5e-05	0.01	0.04	0.3	0.46	0.09
15212	Hexb	0.49	0.29	0.08	0.03	0.77	0.45	8.7	7.5	3.6
12834	Col6a2	1.9	0.45	0.61	0.22	1.8	10.1	5.4	33.6	8.1
240064	Zfp799	5e-05	5e-05	0.01	5e-05	0.02	0.02	0.02	0.22	0.08
18542	Pcolce	5e-05	5e-05	5e-05	0.04	0.02	0.03	0.25	0.06	0.33
23945	Mgll	0.08	5e-05	5e-05	5e-05	0.23	0.72	0.45	1.4	0.85
67454	Ikbip	5e-05	5e-05	0.05	0.03	5e-05	0.16	0.21	0.4	0.1
12842	Col1a1	4.4	2.1	3.3	1.8	5.8	26	19.4	116	9.9
30937	Lmcd1	0.11	0.12	0.07	0.13	0.08	0.79	0.2	1.4	2.6
210126	Lpp	0.03	0.02	0.03	0.04	0.07	0.17	0.39	1.1	0.17
50706	Postn	2.2	0.54	0.78	0.86	4.3	11.9	8.9	48.6	13.4
66251	Arfgap3	5e-05	5e-05	0.009	5e-05	0.03	0.02	0.03	0.05	0.26
19878	Rock2	0.14	0.04	0.12	0.23	0.11	0.72	0.59	0.45	4.1
16424	Itih1	0.78	1.2	0.33	0.83	1	9.4	3.6	13.7	11.2
13717	Eln	0.41	0.06	0.38	0.04	0.54	1.8	0.96	8.5	1.7
56376	Pdlim5	0.28	0.12	0.19	0.18	0.24	1.7	0.54	5.4	1.4
15530	Hspg2	0.14	0.13	0.26	0.05	0.26	1.1	0.62	4.3	1.3
21345	Tagln	1.2	0.61	1.2	2.4	2	8.7	14.4	30.1	7.1
21817	Tgm2	0.16	0.09	0.18	0.36	0.17	2	1	3.5	0.78
239857	Cadm2	5e-05	5e-05	5e-05	0.06	0.15	0.26	0.15	0.54	0.64
226250	Afap1l2	5e-05	0.01	5e-05	5e-05	0.03	0.009	0.03	0.09	0.17
209683	Ttc28	5e-05	0.007	5e-05	5e-05	0.007	0.006	0.02	0.07	0.005
12306	Anxa2	3.9	1.5	4.7	4.8	8.6	21.3	18.2	98.5	28.6
21923	Tnc	0.14	0.01	0.77	0.29	0.65	1.4	3.5	6.6	1.6
100038882	Isg15	0.84	0.41	1.1	0.22	0.54	2	2.2	6	11.7
16432	Itm2b	5e-05	5e-05	5e-05	0.18	5e-05	0.06	0.38	0.46	0.33
12332	Capg	0.79	0.24	1.1	1.2	1.3	2.6	3.6	16.4	8.7
12835	Col6a3	3.8	2.3	1.8	0.85	3.6	13.1	14.4	40.2	12.2
192289	Tmlhe	0.05	5e-05	5e-05	5e-05	0.1	0.55	0.16	0.12	0.13
11669	Aldh2	1.1	0.57	1.1	2.1	2.8	11.9	3.1	17.3	16.7
69675	Pxdn	0.04	0.03	0.01	0.01	0.008	0.36	0.07	0.14	0.04
20719	Serpinb6a	0.98	0.64	0.3	0.69	0.73	5.1	3.3	9.5	2.4
116848	Baz2a	0.16	5e-05	0.007	5e-05	5e-05	0.22	0.07	0.005	0.72
228960	Stx16	5e-05	5e-05	0.01	5e-05	0.04	0.03	0.05	0.11	0.11
104444	Rexo2	0.52	0.49	0.32	0.28	0.26	0.81	1.9	2.6	5.7
27357	Gyg	0.15	0.09	0.12	0.11	0.1	1.1	0.57	0.85	0.71
67092	Gatm	1	0.64	0.18	0.23	1.1	2.9	4	6	4.5
110006	Gusb	0.24	0.18	0.14	0.07	0.39	0.44	1.3	2.1	1.6
12751	Tpp1	0.67	0.16	0.09	0.05	0.46	1.4	1.5	2.8	1.7
13010	Cst3	0.1	0.49	0.53	0.63	0.68	1.4	0.76	5.4	4.5
50527	Ero1l	0.51	0.35	0.03	0.36	0.95	2.1	5.1	2.1	1.5
20130	Rras	0.26	0.2	0.12	0.07	0.12	0.37	0.39	2.3	0.7
18826	Lcp1	1.5	0.55	0.85	3	1.3	3	9.7	14.7	7.1
11750	Anxa7	0.17	0.2	0.35	0.45	0.43	1.6	0.62	3.5	1.7
226519	Lamc1	0.14	0.1	0.48	0.35	0.54	2.1	0.91	3.4	0.89
19132	Prph	6.6	3.9	7.2	6.6	9.6	24.4	14.5	67.7	39.1
11745	Anxa3	0.38	0.1	0.72	0.81	1.2	2	0.86	8.4	2.5
14862	Gstm1	8.3	4.8	2	6.1	7.3	18	10.5	61.7	28.4
16905	Lmna	2.3	1.5	5.5	3.1	9.4	11.8	5.5	53.5	18.2
210376	Mtmr9	0.008	5e-05	5e-05	5e-05	0.07	0.005	0.09	0.05	0.17
20847	Stat2	0.007	5e-05	0.04	5e-05	5e-05	0.01	0.04	0.1	0.04
380684	Nefh	4.8	3.2	3.1	3.4	4.1	18.7	9.5	22.4	20.2
17880	Myh11	0.87	0.49	0.68	0.61	0.44	2	1.4	6.5	1.4
12630	Cfi	0.07	0.25	0.18	0.06	0.3	0.19	0.62	0.78	1.4
76192	Abhd12	0.4	0.45	0.1	0.1	0.59	0.79	0.63	2.3	1.9
52377	Rcn3	1.3	0.35	1.6	0.85	2	4.9	2.1	7.9	5.7
69219	Ddah1	2	1.7	0.08	0.38	1.5	2	4	6.3	6.7
13030	Ctsb	0.82	0.95	0.47	0.84	1.1	1.5	2.5	6.3	3.7
105245	Txndc5	1.3	0.65	1.1	0.54	1.7	2.4	2.2	6.6	6.5
14268	Fn1	8.2	8.6	7	3.1	5.3	21.4	28	40.5	16.2
18642	Pfkm	1.5	1.5	0.52	1	1.6	7.3	2.5	7.1	3.2
233489	Picalm	0.83	0.64	0.94	0.89	1.2	0.97	4.3	5.3	4.2
66395	Ahnak	5	4.1	0.61	1.5	1.8	9.6	8.8	19.5	4.4
72349	Dusp3	0.49	0.4	0.3	0.41	0.62	1.4	1	3.5	1.3
20846	Stat1	1.1	0.31	0.73	0.8	0.62	1.2	1.9	3.3	5.1
56494	Gosr2	0.25	0.25	0.02	0.32	0.19	0.51	0.32	1.5	0.97
11363	Acadl	2.5	1.7	2.2	1.7	2.4	7.3	9.7	9.6	7
27632	Nelfe	2.1	1.5	0.5	1.5	0.44	0.19	0.33	0.25	0.42
12607	Cebpz	0.07	0.28	0.21	0.09	0.18	0.07	0.01	0.01	0.07
51869	Rif1	0.2	0.39	0.48	0.39	0.17	0.13	0.11	0.04	0.03
18563	Pcx	8.3	12.9	7.2	9.2	5.9	1.8	1	2.3	3.1
68964	Ctc1	0.14	0.16	0.12	0.09	0.09	0.02	0.03	0.03	0.03
19726	Rfx3	0.6	0.99	0.32	0.64	0.76	0.15	0.15	0.16	0.14
77683	Ehmt1	0.36	0.51	0.53	0.39	0.37	0.17	0.09	0.03	0.1
209737	Kif15	0.12	0.16	0.44	0.37	0.18	0.05	0.08	0.04	0.05
60532	Wtap	0.98	1.8	2.2	1.9	1.7	0.4	0.37	0.28	0.39
67241	Smc6	0.08	0.2	0.17	0.14	0.27	0.01	0.09	0.03	0.01
69890	Zfp219	0.44	0.46	0.53	1.1	0.99	0.04	0.05	0.24	0.24
68151	Wls	0.15	0.65	0.4	0.07	0.53	0.04	0.07	0.16	0.02
22661	Zfp148	0.55	0.38	0.36	0.19	0.46	0.03	0.18	0.08	0.02
53883	Celsr2	0.05	0.06	0.01	0.02	0.04	0.01	0.007	0.005	0.006
218973	Wdhd1	0.47	3.4	0.64	1	0.55	0.22	0.56	0.1	0.05
18181	Nrf1	11.3	1.9	12.2	1.6	10.8	1.7	2.4	0.86	0.79
16367	Irs1	0.77	1.1	0.63	0.88	0.71	0.29	0.23	0.04	0.06
240174	Thada	0.15	0.07	0.08	0.02	0.05	0.005	0.02	0.01	0.02
68743	Anln	0.09	0.14	0.34	0.33	0.11	0.04	0.02	0.03	0.06
20591	Kdm5c	0.08	0.13	0.04	0.04	0.08	0.02	0.02	0.005	0.009
404710	Iqgap3	0.01	0.08	0.04	0.03	0.07	0.01	0.005	0.008	0.01
50720	Sacs	0.27	0.21	1.6	0.96	0.28	0.03	0.05	0.15	0.23
18007	Neo1	0.72	0.29	0.17	0.42	0.37	0.08	0.11	0.06	0.02
15201	Hells	1	1.4	1.2	1.4	1.1	0.24	0.33	0.15	0.08
13619	Phc1	0.05	0.03	0.05	0.09	0.09	0.04	5e-05	5e-05	5e-05
217578	Baz1a	0.16	0.39	0.5	0.34	0.22	0.04	0.07	0.07	0.02
69731	Gemin7	0.09	0.08	0.07	0.12	0.14	5e-05	0.06	5e-05	5e-05
258370	Olfr1253	0.14	0.17	0.07	0.04	0.08	5e-05	5e-05	5e-05	0.06
259145	Olfr1251	0.14	0.17	0.07	0.04	0.08	5e-05	5e-05	5e-05	0.06
16568	Kif3a	0.14	0.05	0.18	0.09	0.15	5e-05	5e-05	0.07	5e-05
230594	Zcchc11	0.008	0.05	0.07	0.15	0.16	0.004	0.02	0.006	0.02
22682	Zfand5	0.24	0.12	0.54	0.3	0.66	5e-05	0.2	5e-05	5e-05
16551	Kif11	0.35	0.79	1.2	1.3	0.43	0.12	0.15	0.04	0.12
58249	Fibp	0.15	0.17	0.05	0.04	0.18	5e-05	5e-05	5e-05	0.06
107035	Fbxo38	0.06	0.004	0.03	0.08	0.03	5e-05	5e-05	5e-05	0.02
107999	Gtpbp6	1.7	1.9	1.5	0.45	0.2	5e-05	5e-05	0.55	5e-05
104570	Smek2	0.02	0.03	0.08	0.06	0.24	5e-05	5e-05	5e-05	0.04
30951	Cbx8	0.04	0.05	0.08	0.16	0.12	5e-05	5e-05	5e-05	0.04
66442	Spc25	0.22	0.38	0.36	0.24	0.17	0.12	5e-05	5e-05	5e-05
19130	Prox1	0.13	0.06	0.07	0.04	0.07	0.03	5e-05	5e-05	5e-05
235134	Nfrkb	0.008	0.01	0.02	0.01	0.03	5e-05	0.006	5e-05	5e-05
70422	Ints2	0.06	0.07	0.11	0.05	0.25	5e-05	5e-05	5e-05	0.04
93742	Pard3	0.007	0.02	0.05	0.03	0.02	0.009	5e-05	5e-05	0.0002
74112	Usp16	0.13	0.09	0.01	0.01	0.07	5e-05	5e-05	5e-05	0.02
66053	Ppil2	0.09	0.02	0.05	0.14	0.19	5e-05	5e-05	0.03	5e-05
17847	Usp34	0.008	0.01	0.009	0.01	0.02	5e-05	0.003	5e-05	5e-05
268902	Robo2	0.03	0.04	0.06	0.03	0.02	0.009	5e-05	5e-05	5e-05
109113	Uhrf2	0.04	0.06	0.2	0.04	0.07	5e-05	0.02	5e-05	5e-05
52231	Ankzf1	0.02	0.08	0.03	0.04	0.06	5e-05	5e-05	5e-05	0.01
56196	Tdp2	0.25	4	0.31	0.83	0.32	5e-05	0.24	5e-05	5e-05
75292	Prkd3	0.1	0.17	0.13	0.08	0.12	5e-05	5e-05	0.005	0.02
19268	Ptprf	0.04	0.07	0.006	0.08	0.05	5e-05	5e-05	0.01	5e-05
320799	Zhx3	0.08	0.01	0.18	0.16	0.07	5e-05	5e-05	5e-05	0.02
18392	Orc1	0.02	0.02	0.09	0.02	0.05	5e-05	5e-05	5e-05	0.007
81601	Kat5	0.16	0.14	0.14	0.06	0.07	5e-05	5e-05	0.02	5e-05
75410	Kmt2b	0.02	0.02	0.01	0.01	0.01	0.002	5e-05	5e-05	5e-05
665563	Mthfd2l	0.03	0.15	0.04	0.03	0.1	5e-05	5e-05	5e-05	0.01
99003	Qser1	0.02	0.08	0.73	0.1	0.23	5e-05	0.02	0.01	5e-05
108689	Obfc1	0.18	0.18	0.11	0.13	0.18	0.02	5e-05	5e-05	5e-05
98170	Tmem132a	0.02	0.13	0.12	0.12	0.03	5e-05	5e-05	5e-05	0.01
21885	Tle1	0.63	0.57	0.14	0.2	0.21	5e-05	5e-05	0.04	5e-05
17475	Mpdz	5e-05	0.06	0.03	0.02	0.04	5e-05	0.003	5e-05	5e-05
192285	Phf21a	0.22	0.05	0.06	0.01	0.19	5e-05	0.01	5e-05	5e-05
236511	Ago1	0.02	0.05	0.04	0.05	0.12	5e-05	5e-05	5e-05	0.005
227099	Pms1	0.09	0.05	0.16	0.07	0.02	5e-05	5e-05	5e-05	0.007
270893	Tmem132e	0.1	0.14	0.56	0.26	0.04	5e-05	5e-05	0.02	5e-05
20664	Sox1	0.47	0.38	0.87	0.39	0.04	0.03	5e-05	5e-05	5e-05
330409	Cecr2	1.5	0.05	1.1	0.09	0.88	0.02	0.002	0.01	5e-05
18968	Pola1	0.23	0.25	7.2	5.4	11.7	0.007	0.09	0.04	0.04
67788	Sfr1	0.44	0.38	7.1	7.6	7.5	5e-05	0.02	0.07	0.06
18845	Plxna2	0.003	0.005	0.005	5e-05	0.02	5e-05	5e-05	5e-05	5e-05
66231	Thoc7	0.13	0.08	0.44	0.28	0.28	5e-05	5e-05	5e-05	0.005
101471	Phrf1	0.01	0.005	0.01	0.03	0.01	5e-05	5e-05	5e-05	5e-05
216825	Usp22	5e-05	0.005	0.01	0.01	0.04	5e-05	5e-05	5e-05	5e-05
101565	Ccp110	2.8	5e-05	0.09	0.06	0.06	0.008	5e-05	5e-05	5e-05
116837	Rims1	0.03	5e-05	0.008	0.02	0.02	5e-05	5e-05	5e-05	5e-05
12638	Cftr	0.02	5e-05	0.02	0.02	0.02	5e-05	5e-05	5e-05	5e-05
24105	Rbck1	0.01	0.04	5e-05	0.01	0.03	5e-05	5e-05	5e-05	5e-05
12589	Ift81	0.02	0.04	5e-05	0.03	0.006	5e-05	5e-05	5e-05	5e-05
327987	Med13	0.06	5e-05	0.006	0.02	0.01	5e-05	5e-05	5e-05	5e-05
22666	Zbtb14	0.01	0.02	0.03	0.04	5e-05	5e-05	5e-05	5e-05	5e-05
106794	Dhx57	0.08	0.01	5e-05	0.004	0.01	5e-05	5e-05	5e-05	5e-05
14633	Gli2	0.02	0.02	0.05	5e-05	0.02	5e-05	5e-05	5e-05	5e-05
54614	Prpf40b	0.03	5e-05	0.06	0.02	0.01	5e-05	5e-05	5e-05	5e-05
270627	Taf1	5e-05	0.05	0.005	0.04	0.03	5e-05	5e-05	5e-05	5e-05
74388	Dpp8	0.02	0.03	0.01	0.06	0.01	5e-05	5e-05	5e-05	5e-05
77733	Rnf170	0.04	0.05	0.01	0.03	5e-05	5e-05	5e-05	5e-05	5e-05
19211	Pten	0.04	0.06	5e-05	0.01	0.02	5e-05	5e-05	5e-05	5e-05
218397	Rasa1	0.02	0.008	5e-05	0.05	0.06	5e-05	5e-05	5e-05	5e-05
117586	A1bg	0.42	0.01	1.6	0.08	1.5	5e-05	0.005	5e-05	5e-05
213760	Prepl	0.008	0.02	0.08	0.04	5e-05	5e-05	5e-05	5e-05	5e-05
51813	Ccnc	0.03	5e-05	0.03	0.05	0.04	5e-05	5e-05	5e-05	5e-05
56790	Supt20	0.02	0.03	0.06	0.01	0.04	5e-05	5e-05	5e-05	5e-05
215051	Bud13	0.02	5e-05	0.08	0.03	0.03	5e-05	5e-05	5e-05	5e-05
270906	Prr11	0.02	0.02	0.06	0.06	5e-05	5e-05	5e-05	5e-05	5e-05
57908	Zfp318	0.02	0.009	0.07	0.02	0.05	5e-05	5e-05	5e-05	5e-05
223922	Atf7	0.01	5e-05	0.09	0.06	0.02	5e-05	5e-05	5e-05	5e-05
11863	Arnt	5e-05	0.05	0.04	0.05	0.05	5e-05	5e-05	5e-05	5e-05
213575	Dync2li1	5e-05	0.06	0.04	0.08	0.02	5e-05	5e-05	5e-05	5e-05
83922	Cep41	5e-05	0.04	0.02	0.05	0.09	5e-05	5e-05	5e-05	5e-05
319675	Cep295	0.02	0.13	0.01	0.04	0.002	5e-05	5e-05	5e-05	5e-05
72344	Usp36	0.01	0.02	0.09	0.004	0.08	5e-05	5e-05	5e-05	5e-05
117599	Helb	5e-05	0.02	0.05	0.08	0.07	5e-05	5e-05	5e-05	5e-05
66421	2410004B18Rik	5e-05	0.11	0.06	0.01	0.04	5e-05	5e-05	5e-05	5e-05
66667	Hspbap1	0.02	5e-05	0.04	0.11	0.07	5e-05	5e-05	5e-05	5e-05
11569	Aebp2	0.1	0.1	0.03	5e-05	0.02	5e-05	5e-05	5e-05	5e-05
29808	Mga	5e-05	0.11	0.01	0.0006	0.13	5e-05	5e-05	5e-05	5e-05
72290	Lsm11	0.06	5e-05	0.07	0.08	0.08	5e-05	5e-05	5e-05	5e-05
319944	Taf2	0.01	0.27	5e-05	0.02	0.007	5e-05	5e-05	5e-05	5e-05
66701	Spryd4	0.1	0.17	5e-05	0.03	0.04	5e-05	5e-05	5e-05	5e-05
12593	Cdyl	5e-05	0.02	0.11	0.13	0.09	5e-05	5e-05	5e-05	5e-05
230484	Usp1	0.07	0.26	0.04	5e-05	0.01	5e-05	5e-05	5e-05	5e-05
194401	Mical3	0.09	0.03	0.01	5e-05	0.27	5e-05	5e-05	5e-05	5e-05
72462	Rrp1b	0.1	0.06	0.11	0.13	0.02	5e-05	5e-05	5e-05	5e-05
21427	Vps72	0.11	0.14	0.05	5e-05	0.14	5e-05	5e-05	5e-05	5e-05
66464	Taf12	0.05	0.05	0.17	0.17	5e-05	5e-05	5e-05	5e-05	5e-05
76915	Mnd1	0.04	0.05	0.3	5e-05	0.05	5e-05	5e-05	5e-05	5e-05
18020	Nfatc2ip	5e-05	0.08	0.16	0.15	0.13	5e-05	5e-05	5e-05	5e-05
109241	Mbd5	0.12	0.11	0.28	0.01	5e-05	5e-05	5e-05	5e-05	5e-05
101867	Rrp8	0.07	0.06	0.36	0.04	0.03	5e-05	5e-05	5e-05	5e-05
16416	Itgb3	0.07	0.09	0.23	5e-05	0.18	5e-05	5e-05	5e-05	5e-05
18029	Nfic	0.15	0.24	0.12	5e-05	0.08	5e-05	5e-05	5e-05	5e-05
52443	Mrpl48	5e-05	0.14	0.18	0.15	0.13	5e-05	5e-05	5e-05	5e-05
59057	Zfp191	0.19	0.17	0.14	5e-05	0.11	5e-05	5e-05	5e-05	5e-05
240832	Tor1aip2	0.15	0.22	0.21	5e-05	0.06	5e-05	5e-05	5e-05	5e-05
20775	Sqle	0.03	0.17	0.18	0.25	0.03	5e-05	5e-05	5e-05	5e-05
22278	Usf1	0.1	5e-05	0.25	0.21	0.17	5e-05	5e-05	5e-05	5e-05
68911	Pygo2	0.18	0.17	0.11	0.28	0.07	5e-05	5e-05	5e-05	5e-05
234356	Csgalnact1	0.12	0.12	0.33	0.27	0.03	5e-05	5e-05	5e-05	5e-05
223664	Lrrc14	0.09	0.37	5e-05	0.4	0.13	5e-05	5e-05	5e-05	5e-05
66192	Lage3	0.13	0.12	0.24	0.25	0.27	5e-05	5e-05	5e-05	5e-05
217517	Stxbp6	0.04	0.39	0.1	0.49	5e-05	5e-05	5e-05	5e-05	5e-05
213539	Bag2	0.08	5e-05	0.51	0.33	0.27	5e-05	5e-05	5e-05	5e-05
212733	Ccdc64b	0.34	0.05	0.46	5e-05	0.34	5e-05	5e-05	5e-05	5e-05
107071	Wdr74	0.09	0.11	0.82	0.17	0.14	5e-05	5e-05	5e-05	5e-05
28010	Miip	0.33	5e-05	0.38	0.29	0.35	5e-05	5e-05	5e-05	5e-05
207592	Tbc1d16	0.09	0.05	0.05	0.22	0.97	5e-05	5e-05	5e-05	5e-05
97961	Nol12	0.22	0.8	0.26	0.13	0.06	5e-05	5e-05	5e-05	5e-05
117171	1110038F14Rik	0.25	0.27	0.52	0.2	0.25	5e-05	5e-05	5e-05	5e-05
209195	Clic6	0.42	0.2	5e-05	0.12	0.8	5e-05	5e-05	5e-05	5e-05
12649	Chek1	0.53	0.04	0.08	0.95	0.12	5e-05	5e-05	5e-05	5e-05
67116	Cuedc2	0.46	0.27	0.39	0.17	0.44	5e-05	5e-05	5e-05	5e-05
225518	Prdm6	0.52	5e-05	0.31	0.72	0.36	5e-05	5e-05	5e-05	5e-05
20686	Spa17	0.26	5e-05	0.46	0.64	0.86	5e-05	5e-05	5e-05	5e-05
71091	Cdkl1	1.2	0.52	0.75	0.35	5e-05	5e-05	5e-05	5e-05	5e-05
16477	Junb	0.23	0.26	5e-05	1.3	1.1	5e-05	5e-05	5e-05	5e-05
269023	Zfp608	0.009	2.9	0.02	0.02	0.01	5e-05	5e-05	5e-05	5e-05
11886	Asah1	2.1	2.3	1.1	1.7	1.8	4.4	7.9	8.6	7.3
227753	Gsn	5.9	8.3	2.2	5.3	10.7	11.4	20.3	31.8	38
20525	Slc2a1	0.51	0.6	0.4	0.32	0.33	1.5	2.6	1.4	1.2
20280	Scp2	0.79	0.91	0.25	0.43	1.2	2.2	1.3	4.5	3.1
15944	Irgm1	0.39	0.13	1.5	0.07	0.45	1	0.74	2.6	3.4
20742	Sptbn1	2.4	2	1.9	1.8	2.8	5.8	2.9	14.4	10
74237	Tubgcp2	3	2.2	1.9	0.35	0.29	7.1	4	2.3	10.1
109624	Cald1	2.6	1.8	4.8	3.9	5.2	6.8	8.9	26.6	12.7
67861	Akr1b10	1.1	1.1	0.32	0.32	0.46	2.4	2	1.7	3.8
77219	Ptgr2	0.28	0.15	0.02	0.1	0.15	0.19	0.31	0.94	0.64
69080	Gmppa	0.3	0.18	0.12	0.02	0.21	0.23	0.72	0.63	0.84
22330	Vcl	2.2	0.91	2.1	1.9	1.9	5.3	4	13.1	3.8
77006	Ddrgk1	0.09	0.33	0.34	0.34	0.44	0.67	0.63	1	2.1
20848	Stat3	0.4	0.23	0.95	0.48	0.81	1.1	1.1	2.2	3.8
20617	Snca	1.9	1.4	1.4	0.75	2.8	4.3	10.3	2.6	6.1
11671	Aldh3a2	0.39	0.4	0.12	0.29	0.33	0.7	0.52	1.1	2
56421	Pfkp	0.6	0.56	0.41	0.33	0.45	1.1	2.4	1.4	1.6
53322	Nucb2	0.45	0.05	0.23	0.24	0.53	0.42	1.2	1.3	1.2
64383	Sirt2	0.3	0.83	0.17	0.34	0.63	1.1	0.8	1.6	2.6
12010	B2m	1.5	1.8	0.36	1.2	0.86	2.6	5.9	4.3	2.3
17035	Lxn	2.5	0.97	0.68	1.1	3	4.2	2.5	8.3	6.6
81910	Rrbp1	1.1	1	1.8	1.5	2.9	3.3	2.3	8.7	7.1
11430	Acox1	3.1	2.5	1.2	1.5	3.9	7	2.9	10.8	10.7
64652	Nisch	0.03	0.05	0.06	0.02	0.005	0.16	0.07	0.05	0.14
21803	Tgfb1	5e-05	5e-05	5e-05	5e-05	1.1	0.89	1.2	0.07	0.64
18611	Pea15a	4.4	3	0.51	1.3	2.9	6.3	8	8.7	7.6
216238	Eea1	0.16	0.13	0.59	0.39	0.21	1.1	1.6	0.45	0.46
27053	Asns	1.2	1.8	1.7	1.6	0.96	4	5.1	2.8	5.7
11867	Arpc1b	2.2	1.2	2.1	3.2	3	4.4	5.5	10.8	7.1
109754	Cyb5r3	7.7	9	5	4.7	10.4	16.4	10	33.8	26.7
110078	Pygb	2.4	2.4	1.1	2.4	2.8	5	4.6	7.8	8.7
53331	Stx7	0.95	0.8	0.69	1.1	1.5	1.6	2.2	4.5	3.4
73024	Emc7	0.35	0.67	0.39	0.51	0.36	0.84	0.92	1.7	1.8
22235	Ugdh	2.2	2.7	0.66	1.2	4.8	7.7	3.1	5.1	10.7
12268	C4b	1.3	1.6	0.51	1.1	2.1	1.8	4.2	3.8	5.3
20409	Ostf1	2.6	1.3	0.29	1.7	2.6	3.6	3.1	5.8	6.4
20716	Serpina3n	2.7	3.1	0.95	1.3	3.9	4.4	11.3	3.5	6.9
15275	Hk1	1	1.1	0.18	0.51	1	2.4	1.3	2.6	1.8
17904	Myl6	36.2	28.1	25.7	34.3	42.6	85	71.9	138	52.2
12870	Cp	3.6	5.4	1.4	2.4	4.1	5	11.7	8.7	9.6
73710	Tubb2b	58.2	37.5	34	48.1	64.5	86.1	108	171	134
216551	Lgalsl	0.55	1.1	0.2	0.36	0.32	0.89	1.6	1	1.7
68724	Arl8a	2.6	4.7	0.51	0.64	2.9	5.3	4.2	6.2	7.5
94175	Hrg	1.7	3.5	0.8	0.99	1.5	2.9	7.6	3	3.8
15369	Hmox2	0.83	0.7	0.41	0.94	0.8	1	1.4	3	2
68682	Slc44a2	0.1	0.1	0.04	0.03	0.12	0.17	0.09	0.34	0.17
22388	Wdr1	7.4	6.1	5.4	8.5	9.4	11.1	14.6	21.2	25.2
22240	Dpysl3	10.8	8.6	2.6	11.4	11.7	18.1	21.1	22.4	26.4
16784	Lamp2	1.6	1.5	1.8	0.84	0.89	1.8	3.1	4.1	3.7
20779	Src	0.27	0.34	0.11	0.52	0.39	0.56	0.8	1.3	0.46
11758	Prdx6	28.8	23.6	21.9	28.8	25.2	42.5	55.3	74.2	73.5
64833	Acot10	0.15	0.5	0.08	0.08	0.14	0.31	0.61	0.54	0.35
55988	Snx12	3.4	3	1.8	3	2.4	3.8	5.4	4.6	12.1
76960	Bcas1	1.1	0.94	1.2	0.61	3.7	4.5	3	3.4	3.4
60595	Actn4	10.2	9.7	9.9	8.9	8.3	25.1	14.6	29.2	19.5
26433	Plod3	0.35	0.22	0.5	0.45	0.49	0.94	0.62	0.92	1.3
216558	Ugp2	1.3	1.1	1.2	1.4	1.6	3.1	1.5	4.1	3.7
76448	Ppp1r18	0.4	0.22	0.44	0.39	0.44	0.97	1.1	0.68	0.79
12757	Clta	4.1	1.3	7.3	3.4	5.1	7.6	10.8	12.4	8.7
19290	Pura	4.3	4.1	1.7	3.8	4.9	6.1	4.7	11.6	12.5
14208	Ppm1g	4.7	4.7	4.3	5.7	7.2	13.1	12.8	11.9	11.1
72042	Cotl1	7.9	4.2	6.3	10.2	13.3	13.4	11.8	28.2	23.6
17912	Myo1b	0.31	0.56	0.42	0.33	0.22	0.65	1.3	0.89	0.54
245638	Tbc1d8b	0.26	0.17	0.31	0.05	0.11	0.38	0.47	0.42	0.37
11746	Anxa4	1.9	1.4	4	2.6	0.99	4	4.5	7.9	3.1
269713	Clip2	0.35	0.33	0.25	0.32	0.53	0.36	0.75	0.97	1.1
22378	Wbp2	0.25	0.17	0.46	0.2	0.58	0.49	0.8	0.67	1
54683	Prdx5	11	9	4.2	8.3	11.6	12.3	16.8	26.1	23.1
58180	Hic2	3.2	6.1	1.3	3.5	3	7.2	4.5	5.7	12.9
13822	Epb41l2	2.3	2.5	1.4	2.9	3.2	3.2	3.6	8.1	6.2
67247	Marc2	0.34	0.33	0.34	0.27	0.54	0.73	0.37	1.1	0.92
667034	Pnp2	1.3	0.71	0.29	0.6	1.1	1	1.4	1.6	2.8
29875	Iqgap1	2.6	2.8	2.2	3	3.2	3.4	5.5	8.2	6.1
18483	Palm	1.6	0.86	0.35	0.71	0.95	1.5	1.9	2.2	1.8
14756	Gpld1	0.24	0.31	0.25	0.13	0.16	0.32	0.57	0.39	0.52
18537	Pcmt1	2	1.7	0.55	1.3	1.4	3.4	2.8	2.2	3
103967	Dnm3	0.29	0.34	0.17	0.47	0.47	0.4	0.58	0.85	1
14828	Hspa5	78.5	62.8	79.8	95.4	83.8	161	92.8	153	233
55943	Stx8	0.19	0.12	0.31	0.26	0.46	0.46	0.49	0.65	0.53
105148	Iars	2	1.5	1.4	1.5	2.4	2.6	3.6	3.1	4.6
21968	Tom1	0.36	0.28	0.32	0.17	0.46	0.39	0.52	0.74	0.86
11814	Apoc3	10.9	13.4	6.9	8.1	14.6	12	23	24.5	25.5
16412	Itgb1	1.4	1.4	2.2	1.6	1.5	2.3	2.4	4.7	3.3
100226	Stx12	2.4	4.5	2.8	4	4.3	4.6	5.6	8.4	9.4
218952	Fermt2	1.7	1.7	0.88	0.94	1.1	2.3	2	2.6	2.9
16644	Kng1	8.5	13.3	4.1	7.3	8.8	11.5	25.2	12.4	15.9
68585	Rtn4	6.6	6.7	8.1	9.6	9.1	11.2	13	23	14.8
54198	Snx3	6.8	6.6	6.8	5.1	10.7	10	8.4	17.2	19.9
21991	Tpi1	53.1	33	28.7	47.1	49.3	90.5	74.4	79.6	75.4
192662	Arhgdia	99.6	83.6	112	112	120	150	201	205	242
18453	P4hb	29.9	24.4	28.4	31.5	36.8	45	47.9	66.8	68.4
269437	Plch1	0.22	0.18	0.29	0.22	0.46	0.63	0.35	0.51	0.57
74551	Pck2	0.42	0.5	0.26	0.33	0.68	0.74	0.73	0.7	1.1
67830	Rer1	1.6	2	0.95	1.7	3.9	3.2	2.6	4.3	5
329908	Usp24	0.1	0.11	0.04	0.05	0.07	0.09	0.12	0.13	0.21
223601	Fam49b	3.5	3.3	3.1	4.3	4.3	5.9	6.1	6.9	8.5
76709	Arpc2	7.4	7.9	4.2	5.5	5.4	9.9	13.8	12.6	8.7
22041	Trf	95.8	139	62	101	118	135	233	171	224
68576	Lamtor5	3.2	2	2.5	1.8	2.4	3.3	6.2	4	4.1
67437	Ssr3	4.8	4.7	2.2	4.4	3.3	8.8	4.8	5.3	9.2
66314	Tpd52l2	6.8	4.5	4.1	3.6	3.3	8.3	10.6	7.7	5.4
12321	Calu	18	18.8	10.3	10.5	11.3	28.5	27.2	23.6	19.5
94184	Pdxdc1	0.38	0.36	0.21	0.38	0.39	0.38	0.7	0.63	0.74
19344	Rab5b	6	5.4	2.7	3	6	5.3	7.4	10.2	9.3
20163	Rsu1	3.9	3.4	2.2	3.6	3.7	4.2	5	8	6.2
67938	Myl12b	31.9	25.1	28.1	29.8	30.9	46.1	52.9	66.4	37.6
68365	Rab14	14	16.1	12.8	15	16.5	24.3	23.7	27.4	27.4
17758	Map4	7.1	4.7	6.4	7.7	6.4	8	10.7	13.1	12.8
11764	Ap1b1	2.3	1.3	1.2	1	1.2	2.3	1.7	2.6	3
13430	Dnm2	1.8	1.9	1.3	1.9	2.4	2.9	2.8	3.6	3.4
271457	Rab5a	9.7	12.3	6.1	7.5	10.1	15.3	18.4	14.3	13.8
11461	Actb	1585	1409	1431	1933	1884	3200	2214	3095	2485
59021	Rab2a	23	24	11.3	20.7	20.1	34.1	33.1	25.9	38.7
66713	Actr2	10.3	7.8	9	11.2	9.4	13.3	15	19.7	15.2
16430	Stt3a	1.4	1.5	1.1	1.2	1.3	1.6	2	2.6	2.4
19353	Rac1	19.8	19.6	11.9	19.1	25.1	24.6	30.9	30.6	38.5
78830	Slc25a12	2.1	2.1	1.3	1.2	2.4	3.2	3.1	3	2.4
27965	Spg21	0.18	0.23	0.1	0.19	0.16	0.19	0.25	0.32	0.34
231086	Hadhb	7.7	9.9	6.9	7	8.8	11.5	8.6	15.7	15.6
217124	Ppp1r9b	0.7	0.55	0.32	0.49	0.6	0.95	0.57	0.86	1
14489	Mtpn	45.2	49.1	24.4	46.7	49.1	60.3	70.8	47.7	92.1
55951	Mpc1	0.63	0.65	0.29	0.39	0.45	0.9	0.52	0.73	0.89
19349	Rab7	28.6	32.6	22.2	35	31.4	45.3	46.8	45	51.2
213350	Pddc1	0.94	0.93	0.59	0.79	1.4	1.3	1.1	1.9	1.5
27054	Sec23b	0.91	0.91	0.77	0.93	0.98	1.1	1.1	1.5	1.9
22334	Vdac2	11.7	14.9	14.1	10.9	14.7	20	16.9	21.2	24.4
56418	Ykt6	3.2	3.9	2.8	4.9	4.6	6.5	5.3	4.8	7.4
74117	Actr3	9.2	8.1	8.5	13.7	13.6	13.5	14.6	20.9	16.2
11739	Slc25a4	42.9	47.5	30.3	38.6	46.4	67.8	53.7	65.8	61.9
68917	Hint2	0.88	0.93	0.81	0.77	1.5	1.1	1.6	1.8	1.4
73137	Prrc1	1	1.1	0.59	0.63	0.67	1.3	1.3	0.89	1.3
54161	Copg1	4.1	4.9	2.4	3.6	2.7	5.2	4.7	6.4	4.8
67300	Cltc	20.4	22.9	17.1	20.7	22.8	25.9	30.8	35.5	31.3
18242	Oat	7.7	11.4	8.6	10.7	8.3	12	12.2	16.9	13.8
66508	Lamtor1	2.2	3.1	1.3	2.4	1.9	3.2	3.6	3.1	2.9
22333	Vdac1	55.5	59.7	37.1	45.1	53.3	84.6	74	74.3	58.6
232664	Ccdc136	5e-05	1.3	5e-05	5e-05	5e-05	0.56	0.07	0.52	0.36
67804	Snx2	6.1	6	5.2	5.8	4.9	7.1	8.4	8.2	8.6
30960	Vapa	13.5	13.1	9.6	13.9	12.6	20.7	15.7	15.3	20.4
56433	Vps29	3.3	3.3	3.8	4.3	4	4.7	5	5.7	6
19326	Rab11b	18	15.9	12.5	20.1	20.8	19.1	25.2	29.7	25.8
19155	Npepps	4.7	4.1	4.1	4.1	4.3	5.3	6.8	4.9	7.3
227613	Tubb4b	197	212	126	159	205	238	220	315	234
67458	Ergic1	3.2	4.2	2.2	3.2	3.7	4.1	5	4.9	4.3
15488	Hsd17b4	5.8	7	5.3	5.9	7.7	8.7	8.8	8.7	8.3
55980	Impa1	4.7	3.4	4.4	5.9	4.6	5.5	6.6	6	6.4
59287	Ncstn	1.1	1.4	1.1	0.86	1.3	1.4	1.7	1.6	1.4
14719	Got2	21.1	20.8	14.9	20.3	24	24	33.7	23.2	25.8
229877	Rap1gds1	2.7	3.1	3.4	3.4	3.5	3.9	3.4	4.7	4.7
110826	Etfb	16.4	15.1	11.4	11.8	13.6	15.9	15.1	21.6	18.1
28080	Atp5o	22.3	28.8	20	18.7	24.4	33.3	23.7	29.1	31.7
53381	Prdx4	33.3	35.9	30.7	40	26.4	40.1	49	37.7	41.5
54401	Ywhab	58.4	49.8	44.9	69.1	57.6	70.3	69	66.7	75.5
74098	0610037L13Rik	2.6	1.9	2.1	2	1.8	2.7	2.7	2.5	2.2
15387	Hnrnpk	80.3	88.9	88.2	108	106	88.4	74	75.8	78.7
225027	Srsf7	62.3	77.9	65.5	76.6	67.8	63.6	53.4	56.3	56.4
20823	Ssb	21.2	23.1	25	26.5	26.9	17.1	21.6	19.1	22.7
71514	Sfpq	44.2	41.7	43.1	48.7	53.8	41.7	36.9	33.5	38.9
19383	Raly	10.4	12.4	12.9	13.1	14.6	10.7	9.7	11.3	9.3
54127	Rps28	158	139	182	169	129	139	113	118	124
19941	Rpl26	73.3	86	89.5	101	84.6	61.4	69.1	68.3	71.6
13209	Ddx6	9.1	11.5	9.5	10.8	9.6	7.2	9	6.9	8.3
101706	Numa1	4.5	5.3	5.5	4.2	6.1	3.9	3.2	4.6	4.2
20016	Polr1c	1	0.77	0.93	0.69	0.75	0.63	0.77	0.55	0.62
56194	Prpf40a	2	2.3	2.5	2.3	2.2	1.9	2	1.4	1.7
53610	Nono	46.5	51.8	46.9	45.5	52.3	43.8	37.6	32.6	35.5
56258	Hnrnph2	16.8	19.3	19.4	24.8	19.6	13.1	13.1	18.4	16.4
20462	Tra2b	12.3	12.9	15.9	15.8	19.9	12.3	11.5	11.7	11.3
27979	Eif3b	7.2	8.6	10.7	11.5	9.3	5.8	7.4	7.2	8.4
19921	Rpl19	63.8	73.8	71.4	105	88	68.1	63.7	51.6	61.1
27367	Rpl3	38.6	47	46.8	54.9	44.8	36.9	35.1	38.2	30.6
70470	Rprd1b	3.9	3.8	3.5	4.4	4.3	2.8	3.1	2.9	3.2
20102	Rps4x	56.2	67.2	63	93.6	76.1	55.6	55.4	53.2	47.7
18432	Mybbp1a	10.9	14.9	14.7	12.7	13.3	12.5	8.1	8.4	10.5
94213	Ddx50	0.39	0.55	0.48	0.54	0.55	0.34	0.41	0.27	0.44
19655	Rbmx	21.6	22.2	26.4	26.1	29.4	20.2	16.1	17.1	19.4
19821	Rnf2	3.1	2.7	3.4	2.9	3.1	2.2	2	2.1	2.5
50709	Hist1h1e	560	598	749	498	794	543	531	401	376
81898	Sf3b1	8.6	10.1	8.6	8.6	7.9	7.3	7.6	5	5.4
56444	Actr10	0.77	0.63	0.56	0.76	0.76	0.43	0.65	0.44	0.49
14359	Fxr1	3.4	4.5	4.7	5.1	3.6	2.8	3.4	2.4	3.7
319322	Sf3b2	9.1	8.2	10.5	7.9	7.8	6.6	7.5	4.8	6.2
19899	Rpl18	103	94.4	175	133	134	93.9	85.3	88	96.8
64934	Pes1	1.7	2.2	2.2	1.3	1.3	1.3	1.2	1.1	1.3
19943	Rpl28	27	30.8	40.9	44.9	39	24.4	25.9	27.8	24.4
228410	Cstf3	3.4	3.7	2.1	2.6	3.2	1.7	2.5	1.8	2.4
223691	Eif3l	10.4	11.6	11.1	12.6	10.4	8.6	8.6	6.3	7.9
60365	Rbm8a	19.6	19.3	22.4	26.7	17.3	14.8	17.9	13.9	12.3
107260	Otub1	13.2	11.4	9.6	12.2	11.5	9.2	9.6	6.5	7
67040	Ddx17	30.4	27.8	26.1	28.5	33.2	21.9	23	15.6	20.6
73830	Eif3k	5.4	6.4	5.7	8	5.4	5	5.1	3.5	3.5
15382	Hnrnpa1	144	158	138	152	147	125	85.3	109	88.9
78303	Hist3h2ba	7790	7506	7665	7741	6572	5691	3785	5331	5770
100043813	Rps27rt	30.3	37.6	30.8	45.2	37.7	28	24.4	20.4	26.9
232989	Hnrnpul1	4.1	4.7	3.1	5.2	4.2	2.6	3	3.1	2.9
225058	Gm4832	6.5	7.1	4.9	6.5	5.2	4.2	5.5	3.2	3.4
98221	Eif3m	11.6	8.9	8.2	6.6	6.1	5.9	5.3	5.8	5.3
15193	Hdgfrp2	0.97	1.2	1.3	0.89	1.2	0.69	0.7	0.73	0.87
14083	Ptk2	0.8	0.63	0.65	0.55	0.46	0.3	0.55	0.4	0.4
17999	Nedd4	10.4	11.5	8.8	11.5	12.3	7.3	6.2	6.1	9.3
110460	Acat2	14	11.8	13.8	16.3	15.4	10.2	12.9	7.8	6.8
20586	Smarca4	3.8	4.4	2.9	2.9	4.2	3.2	2.2	1.9	2.3
107932	Chd4	5.6	7.2	5	4.3	4.9	4.9	3.6	2.5	3.2
66055	Sf3b6	4.4	5.7	7.8	8.4	6.2	3.1	3.8	4.5	5.6
69719	Cad	5.3	6.6	7.2	6.9	5.9	3.9	5.5	3	4.2
72567	Bclaf1	3	3.1	3.4	2.1	3.4	2.1	1.5	2	2.2
140570	Plxnb2	2	1.7	1.4	1.8	1.8	0.92	1.3	1.3	1
69276	Sec62	0.63	0.65	1.2	0.78	0.88	0.38	0.55	0.71	0.51
232536	Mrps35	0.22	0.34	0.5	0.34	0.3	0.28	0.23	0.19	0.18
269587	Epb41	3.1	3.2	3.9	3	4.1	2.9	2.2	1.9	1.9
20926	Supt6	0.6	0.8	0.94	0.67	0.66	0.4	0.66	0.41	0.41
104112	Acly	12.2	12.9	14.6	13	11.4	7.8	12	6.1	6.9
21453	Tcof1	0.82	1.2	1.4	1.2	1.4	0.94	0.63	0.7	0.81
66988	Lap3	26.7	34.3	29.2	28.1	24	19.5	15.1	14.7	23.4
74355	Smchd1	1.4	2.1	1.2	1.2	1.8	1.2	1.1	1	0.63
56357	Ivd	0.96	1.3	1.2	1.4	1.4	0.86	0.6	0.79	0.94
114741	Supt16	8.7	11	9.8	9.7	8.2	7.4	7.6	4.9	4.2
68598	Dnajc8	6.7	4.9	7.9	8.3	6.4	4.5	5.4	4.6	2.8
100710	Pds5b	3.2	3.9	2.4	2.1	2.7	2.2	2	1.4	1.6
14911	Thumpd3	1.1	1.4	1.1	1.3	1.2	0.69	0.93	0.6	0.85
70099	Smc4	5.5	4.3	5.3	6.1	3.9	2.1	3.6	4.3	2.5
13669	Eif3a	10.8	11.8	12.5	11.1	11.1	7.2	7.3	6	8
67039	Rbm25	2.5	3	2.8	2.9	3.3	1.8	1.6	1.7	2.1
20021	Polr2c	1.5	1.7	1.9	2.4	2.2	1	0.88	1.5	1.4
230753	Thrap3	5.3	6.5	7.5	6.3	8.4	4.2	3.8	4.1	4.6
67996	Srsf6	16.5	17.4	20.3	24.8	24.8	16.3	12.2	11.6	10.6
67337	Cstf1	1.8	1.7	1.4	0.92	1.3	0.9	0.81	0.76	1
76246	Rtf1	0.93	0.83	0.84	0.97	0.9	0.56	0.68	0.35	0.58
329506	Ctdspl2	0.79	1.4	0.81	0.66	1.1	0.49	0.6	0.73	0.48
57261	Brd4	0.66	0.68	0.76	0.66	0.97	0.45	0.37	0.51	0.47
55944	Eif3d	8.1	9.5	11	11.7	9.4	7	6.2	5.5	5.1
69617	Pitrm1	2	2.1	2.3	2.6	2.1	1.1	1.5	1.2	1.5
18949	Pnn	1.3	2.6	2.9	2.4	3.4	1.9	1.7	1.1	1.3
68981	Snrpa1	14.5	17.3	31.2	17.7	27.9	10.9	11.8	18.2	10.8
14886	Gtf2i	6.8	8.7	7.1	7.6	9.1	6.6	3.1	3.6	5.4
112419	Ifit1bl2	0.71	0.7	1.6	1.1	1.4	0.68	0.73	0.6	0.6
22668	Sf1	7.2	5.4	8.9	6.7	6.6	3.8	4	3.6	5
108671	Dnajc9	9.4	8.3	12.7	12.6	10.3	6.7	8.1	5.2	5.1
23808	Ash2l	0.77	0.75	0.75	0.93	0.92	0.65	0.41	0.31	0.57
108155	Ogt	2.7	2.6	2.5	2.5	3.1	1.7	1.9	1.2	1.5
19386	Ranbp2	0.62	0.8	1.1	0.98	0.98	0.56	0.46	0.61	0.46
246221	Mpst	10.7	12.2	6.4	9.8	9.5	6.9	5.9	4.6	5.2
57317	Srsf4	4.9	4.8	9.4	7.7	10.5	2.9	4.1	4.7	5.6
83945	Dnaja3	0.47	0.56	0.47	0.79	0.65	0.24	0.44	0.41	0.27
20924	Supt5	2.2	2.1	2	2.9	1.8	1.3	1.5	1.3	0.97
104383	Rcor2	1.5	1.4	1.2	1.2	1.9	0.96	1.2	0.53	0.62
382090	Cep162	0.54	0.84	0.94	1.5	1.1	0.42	0.75	0.63	0.46
57312	Mrps31	0.57	0.81	0.76	0.99	0.77	0.42	0.42	0.44	0.51
243272	Sbno1	0.1	0.09	0.18	0.11	0.11	0.05	0.07	0.06	0.09
13800	Enah	1.6	1.4	2.3	3.1	3.4	1.2	1.3	1	1.9
93686	Rbfox2	1.5	1.5	1.8	1.3	1.8	0.54	1.2	0.86	1
67684	Luc7l3	2.8	3.2	4.6	5.3	5.4	2.5	2	2.8	2.4
14904	Gtpbp1	1.8	2	1.5	1.7	1.9	0.6	1.4	0.85	1.2
68275	Rpa1	4.5	5.5	5.5	6.7	5.3	3.6	4.3	2.1	2.5
78798	Eml4	0.74	0.99	0.76	1.2	0.65	0.67	0.49	0.49	0.32
56350	Arl3	12.2	11.1	8.8	10.6	11.3	4.7	4.3	6.6	8.9
73139	Cenpv	8.5	11.5	9.4	6.9	10.9	6.3	4.2	6.3	4.4
72831	Dhx30	1	1.4	1	1.1	1.2	0.45	1	0.58	0.53
67255	Zfp422	6.8	5.3	5.5	4.1	5.8	3.4	2.2	2.8	3.9
12537	Cdk11b	0.88	1.3	1.5	0.58	1.6	0.61	0.79	0.48	0.72
68183	Bcas2	6.6	4.4	3.5	3.6	2.7	2	3.2	1.8	2.2
67873	Mri1	2.4	2.2	2.9	3.6	3.4	1.5	2.1	1.6	1.2
331401	Thoc2	0.3	0.53	0.65	0.63	0.52	0.29	0.29	0.28	0.3
116870	Mta1	3.4	4.2	3.9	3.6	4.2	2.6	2.8	1.5	1.6
433759	Hdac1	4	6.1	3.9	3.3	3.6	3.2	2.7	1.9	1.4
67070	Lsm14a	0.84	0.81	0.99	0.75	0.93	0.35	0.4	0.43	0.72
20917	Suclg2	2.2	4	2.4	3.4	2.8	1.4	1.3	1.4	2.4
229584	Pogz	0.6	0.54	0.4	0.28	0.8	0.34	0.35	0.21	0.25
228880	Zmynd8	0.33	0.43	0.27	0.21	0.47	0.15	0.15	0.19	0.26
18194	Nsdhl	2.3	3.4	3	3.1	2.6	1.5	1.9	1.6	1.3
229700	Rbm15	0.49	0.48	0.63	0.25	0.65	0.25	0.18	0.33	0.33
20020	Polr2a	1.5	1.4	1.2	1.2	1.2	0.69	0.96	0.51	0.67
23942	Mta2	3.1	3.5	2.8	2.8	3.7	1.5	2.2	1.3	1.9
28000	Prpf19	29.6	33.6	24.2	31.9	32.8	16	15.5	14.4	20.1
107272	Psat1	37.2	48.1	34.3	30.9	32.3	23.7	18	17.9	19.3
18139	Zfp638	0.92	0.82	0.55	0.79	0.9	0.55	0.48	0.3	0.38
68011	Snrpg	23.6	24.3	23.2	36.3	32.5	10.9	20.5	18.5	10
68209	Rnaseh2c	2.4	1.9	3.1	2.6	1.7	1.5	1.5	0.9	1.1
52874	D19Bwg1357e	0.69	1.1	0.5	0.4	0.47	0.28	0.38	0.41	0.28
12039	Bckdha	1.5	2.2	0.98	2	1.8	0.51	1.2	0.71	1.2
66483	Rpl36al	15.7	16.2	20.6	27.5	16.8	9.8	9.7	8.9	12.9
56150	Mad2l1	2.5	2.9	3.2	4.5	2.4	1.6	1.7	1.1	2.2
229542	Gatad2b	3.8	4.3	3.9	3.8	4.2	2.8	2	1.6	2.1
12419	Cbx5	17	12.2	17.3	12.7	15.8	11.3	8.2	6.7	5.5
229663	Csde1	3.4	3.7	4.5	4.6	4.4	1.6	2.3	2.1	2.7
26965	Cul1	1.1	1.3	1	1	0.53	0.4	0.59	0.42	0.67
68134	Upf3b	0.15	0.14	0.27	0.32	0.26	0.14	0.14	0.13	0.07
68693	Hnrnpul2	8.8	10	4.9	5.1	7.9	4.5	3.7	4.1	2.9
14874	Gstz1	0.66	0.93	0.45	0.64	0.58	0.18	0.26	0.49	0.42
234023	Arglu1	3.9	3.2	6.8	5.9	6.3	2.2	3.9	2.7	2
71521	Pds5a	1.9	1.9	1.6	1.5	1.5	1.1	1.1	0.74	0.52
68147	Gar1	0.88	2.4	1.7	1.4	1.9	1.1	1.1	0.64	0.56
233876	Hirip3	1.3	1.2	1.5	1.1	1.6	0.71	0.76	0.43	0.85
18575	Pde1c	1.1	0.76	0.66	1.5	1.1	0.48	0.48	0.28	0.86
53861	Zranb2	0.42	0.38	0.59	0.8	0.33	0.27	0.22	0.19	0.35
22247	Umps	1.1	1	1.3	1.7	0.95	0.59	0.83	0.48	0.57
12400	Cbfb	10.1	11.7	8	9.7	8	4.9	6.5	3.5	4.4
74148	Cluh	0.23	0.2	0.25	0.25	0.18	0.13	0.16	0.06	0.1
17089	Lyar	1.8	1.8	3.6	2.9	1.2	1.8	0.85	1	0.91
68879	Prpf6	2	2.1	2.2	2	3.3	0.96	1.8	0.99	0.9
68463	Mrpl14	0.8	0.53	0.43	0.46	0.5	0.17	0.25	0.32	0.35
236732	Rbm10	0.8	0.7	1.3	0.8	0.98	0.79	0.25	0.41	0.38
66317	Wdr61	1.4	1.9	2.8	3.8	2.1	1.1	1	0.89	1.8
67459	Nvl	0.7	1	1	0.8	0.93	0.51	0.52	0.24	0.48
14156	Fen1	7.5	6.9	7.1	8	8.8	3.4	3.8	3.8	4.1
215193	Diexf	0.18	0.22	0.18	0.14	0.27	0.09	0.15	0.08	0.07
14375	Xrcc6	2.5	2.7	2.5	1.9	1.8	0.83	1.5	1.3	0.86
67088	Cand2	0.59	0.86	1.1	1.1	0.49	0.42	0.4	0.49	0.32
66446	Exosc7	0.64	0.7	1	1.3	1.1	0.49	0.65	0.36	0.36
11632	Aip	0.51	0.47	0.49	0.55	0.87	0.28	0.22	0.24	0.39
93760	Arid1a	0.49	0.5	0.76	0.6	0.72	0.4	0.15	0.31	0.34
19687	Rfc1	0.61	0.82	0.59	0.65	0.71	0.42	0.48	0.21	0.21
21981	Ppp1r13b	0.45	0.76	0.63	0.81	1.5	0.43	0.43	0.5	0.26
227331	Gigyf2	0.28	0.45	0.36	0.72	0.33	0.13	0.17	0.23	0.3
215387	Ncaph	1.4	1.6	2.9	2.9	1.5	1.1	1.4	0.49	1
19718	Rfc2	3.2	3.5	3	5.4	2.6	2	1.8	1.4	1.6
54392	Ncapg	2.1	3.1	4.2	3.4	3.3	2	2.1	0.94	1.1
216156	Wdr18	1.1	1.4	1.4	1.3	1.4	0.44	0.86	0.66	0.54
13844	Ephb2	0.85	0.67	0.5	0.87	0.78	0.58	0.21	0.29	0.31
77781	Epm2aip1	2.2	2.3	1.3	1	1.9	0.53	1.6	0.49	0.65
13361	Dhfr	5.5	7.5	5.1	7.8	4.7	3.8	3.5	1.9	2.2
21413	Tcf4	0.49	0.49	0.6	0.7	1	0.32	0.2	0.33	0.37
240087	Mdc1	0.98	0.96	1.2	1.2	1	0.46	0.7	0.46	0.36
72151	Rfc5	2	2.7	2	1.4	2.1	1.1	1	0.7	0.97
229096	Ythdf3	2.4	2.3	3.1	3.5	1.5	1.5	0.91	1.6	0.72
58523	Elp2	1.7	1	0.81	1	0.77	0.41	0.84	0.36	0.34
108888	Atad3a	2.7	3	2.2	2.2	3.2	1	1.3	0.81	1.8
224111	Ubxn7	2	1.9	1.9	2.4	1.9	0.71	1.7	0.59	0.71
68816	Ppil1	5.6	5.2	2.6	5.1	2.2	2.4	2.8	1.1	1.3
68925	Rpap1	0.08	0.05	0.07	0.07	0.03	0.03	0.03	0.02	0.03
22275	Urod	6.1	6.6	5.6	2.6	7	2.8	3	3.1	1.3
15277	Hk2	6.7	11.3	3.7	7.9	7.4	4.5	3.2	2.9	2.8
217995	Heatr1	0.18	0.42	0.38	0.4	0.25	0.18	0.11	0.16	0.14
28126	Nop16	0.87	0.64	0.51	0.4	0.62	0.14	0.36	0.2	0.4
106344	Rfc4	3.4	4.3	3.9	5.2	4.1	2.1	2.5	1.1	1.8
66246	Osgep	0.7	1.1	1.2	0.6	1	0.36	0.52	0.33	0.41
19134	Prpf4b	0.63	1.1	0.5	0.39	0.65	0.4	0.18	0.32	0.24
208715	Hmgcs1	2	1.8	2.1	2.9	1.3	0.78	1.7	0.59	0.45
22083	Ctr9	0.37	0.52	0.34	0.23	0.32	0.19	0.09	0.16	0.18
241846	Lsm14b	1.2	1.8	1	1	0.99	0.65	0.36	0.49	0.58
24061	Smc1a	5.4	5.7	5.1	5.4	5.8	2.8	2.3	2.5	1.9
57315	Wdr46	0.37	0.36	0.7	0.4	0.46	0.31	0.14	0.25	0.09
105372	Utp15	0.74	1	1	0.25	0.49	0.31	0.33	0.28	0.28
24127	Xrn1	0.03	0.05	0.07	0.04	0.1	0.02	0.02	0.02	0.04
20227	Sart1	2.1	1.4	2.7	2.7	3	1.1	0.87	1	1.1
12293	Cacna2d1	0.78	0.93	0.29	0.64	0.4	0.21	0.36	0.27	0.19
233532	Rsf1	0.56	0.58	0.44	0.32	0.56	0.2	0.29	0.14	0.2
59015	Nup160	0.5	0.77	0.71	0.25	0.56	0.22	0.27	0.35	0.1
140579	Elmo2	0.86	1.1	1.3	2.7	1.9	0.82	0.52	0.97	0.33
80912	Pum1	0.72	0.78	0.67	0.76	0.5	0.18	0.54	0.25	0.18
233904	Setd1a	0.07	0.05	0.06	0.03	0.12	0.02	0.02	0.02	0.05
67302	Zc3h13	0.05	0.09	0.07	0.04	0.05	0.03	0.03	0.01	0.03
76130	Las1l	0.52	0.62	0.42	0.5	0.41	0.2	0.25	0.14	0.23
18027	Nfia	17.4	15.5	12.3	12.6	14.3	6.6	6	5.5	5.8
98956	Nat10	0.82	1.2	0.74	0.61	0.63	0.45	0.49	0.21	0.17
21417	Zeb1	0.9	0.98	1.2	0.91	0.71	0.26	0.55	0.34	0.4
234865	Nup133	0.49	0.73	0.78	0.26	0.53	0.17	0.29	0.25	0.21
70790	Ubr5	0.29	0.13	0.19	0.11	0.16	0.05	0.1	0.06	0.08
66642	Ctnnbl1	1.5	2.1	2.2	1.9	2.6	0.98	0.91	0.54	0.96
70683	Utp20	0.1	0.17	0.15	0.09	0.13	0.09	0.06	0.04	0.02
80913	Pum2	0.47	0.24	0.28	0.26	0.64	0.17	0.22	0.13	0.1
107823	Whsc1	0.6	0.75	0.6	0.47	0.42	0.16	0.47	0.17	0.13
226747	Ahctf1	0.12	0.17	0.24	0.09	0.21	0.07	0.1	0.05	0.05
18971	Pold1	0.94	1.5	1.4	1.5	1.4	0.4	1	0.4	0.39
259279	Tubgcp3	0.12	0.43	0.25	0.35	0.24	0.11	0.15	0.08	0.11
19075	Prim1	0.66	0.75	1	1.2	0.79	0.13	0.43	0.38	0.48
110147	Ehmt2	0.6	0.68	0.45	0.36	0.39	0.34	0.25	0.13	0.08
67707	Mrpl24	0.54	0.77	0.34	1.1	0.73	0.3	0.22	0.22	0.36
108857	Ankhd1	0.11	0.18	0.15	0.08	0.09	0.05	0.08	0.03	0.03
78894	Aacs	2.1	2.4	2.1	1.9	1.2	0.72	1.1	0.51	0.69
171580	Mical1	2.6	4.6	1.1	1.6	1.7	1.3	0.42	1	0.89
67439	Xab2	0.64	0.93	1.1	1.1	0.96	0.29	0.48	0.3	0.39
78523	Mrpl9	0.26	0.3	0.73	0.35	0.38	0.09	0.21	0.16	0.16
53319	Nxf1	2.6	2.9	2.4	2.5	3.1	1.5	0.83	0.71	1.1
11784	Apba2	0.51	0.26	0.2	0.33	0.37	0.13	0.11	0.14	0.13
269061	Cpsf7	1.2	1.3	1.3	1.6	3.9	0.37	0.57	0.9	0.96
98488	Gtf3c3	0.42	0.51	0.31	0.26	0.27	0.1	0.3	0.07	0.06
11775	Ap3b2	0.76	1	0.49	0.67	0.96	0.13	0.37	0.17	0.48
330662	Dock1	0.47	0.66	0.53	0.36	0.47	0.1	0.23	0.2	0.2
23939	Mapk7	0.75	0.45	0.58	0.9	0.75	0.17	0.42	0.08	0.33
56531	Ylpm1	0.64	0.56	0.55	0.43	0.66	0.17	0.2	0.15	0.3
19654	Rbm6	0.28	0.31	0.55	0.39	0.28	0.14	0.19	0.1	0.09
109333	Pkn2	0.12	0.13	0.21	0.31	0.24	0.05	0.07	0.07	0.1
66874	1200014J11Rik	0.48	0.43	0.4	0.24	0.24	0.12	0.21	0.08	0.1
13728	Mark2	0.54	0.63	0.14	0.23	0.5	0.06	0.13	0.2	0.19
109331	Rnf20	0.47	0.64	0.72	1	0.86	0.13	0.44	0.2	0.27
13176	Dcc	0.57	0.6	0.34	0.65	0.96	0.09	0.28	0.26	0.24
277414	Trp53i11	5.4	6.7	5.4	8.8	5.8	1.9	2.7	3.4	0.91
320727	Ipo8	0.57	0.69	1.6	0.48	1.6	0.35	0.62	0.27	0.13
227699	Nup188	0.08	0.17	0.07	0.06	0.09	0.04	0.03	0.03	0.03
101437	Dhx32	0.13	0.21	0.16	0.11	0.08	0.06	0.09	0.02	0.02
66254	Dimt1	0.2	0.22	0.3	0.3	0.07	0.03	0.09	0.08	0.1
67345	Herc4	0.41	0.4	0.32	0.31	0.17	0.08	0.15	0.04	0.17
20743	Sptbn2	0.53	0.85	0.53	0.82	0.83	0.07	0.24	0.41	0.25
101568	Vrk3	0.41	0.23	0.28	0.39	0.46	0.07	0.11	0.1	0.2
66497	Cmss1	0.72	0.67	0.84	0.88	1.4	0.15	0.54	0.2	0.32
67381	Med4	0.54	0.93	0.37	0.32	0.19	0.17	0.17	0.24	0.05
16564	Kif21a	0.2	0.22	0.61	0.33	0.33	0.04	0.09	0.18	0.14
12571	Cdk6	10.7	12.4	8.6	12.7	12.7	6.4	3.7	3	2.1
353242	Mrpl21	0.11	0.15	0.45	0.32	0.11	0.05	0.09	0.08	0.08
22404	Wiz	0.43	0.55	0.64	0.28	0.45	0.21	0.18	0.15	0.07
18572	Pdcd11	0.62	0.95	0.67	0.44	0.5	0.26	0.22	0.19	0.13
70999	Naa40	0.4	0.28	0.69	0.15	0.37	0.07	0.07	0.18	0.15
24116	Nelfa	0.26	0.26	0.37	0.37	0.39	0.03	0.06	0.28	0.04
22594	Xrcc1	0.51	0.39	0.65	0.52	0.42	0.11	0.13	0.05	0.32
229504	Isg20l2	0.3	0.68	0.64	0.16	0.88	0.17	0.16	0.23	0.09
72554	Utp14a	0.59	0.5	0.75	0.38	0.49	0.05	0.15	0.26	0.19
27355	Pald1	1.2	1.9	0.26	1.5	1.7	0.35	0.61	0.37	0.24
216767	Mrpl22	0.86	0.81	0.39	0.45	0.47	0.19	0.06	0.11	0.35
11920	Atm	0.07	0.13	0.09	0.06	0.07	0.02	0.03	0.01	0.04
18082	Nipsnap1	1.4	1.9	2.2	1	2.2	0.39	0.6	0.52	0.56
67153	Rnaseh2b	1.3	0.9	2.5	0.68	2.9	0.18	0.45	0.64	0.7
18854	Pml	0.93	0.62	0.23	0.77	0.31	0.24	0.12	0.25	0.07
66993	Smarcd3	0.4	0.23	0.97	0.62	0.35	0.08	0.17	0.21	0.15
233863	Gtf3c1	0.19	0.22	0.17	0.24	0.15	0.06	0.1	0.05	0.02
209416	Gpkow	1.3	1.2	0.73	0.34	1.2	0.12	0.32	0.19	0.5
76007	Zmym2	0.27	0.27	0.25	0.28	0.3	0.04	0.23	0.03	0.02
53618	Fut8	0.46	0.34	0.43	0.5	0.38	0.06	0.12	0.12	0.19
75974	Dock11	0.43	0.68	0.38	0.53	0.46	0.21	0.2	0.13	0.03
100502766	Kifc1	0.16	0.31	0.66	0.71	0.51	0.04	0.38	0.07	0.05
78783	Brpf1	0.06	0.19	0.07	0.08	0.08	0.04	0.04	0.01	0.02
75137	Rprd2	0.28	0.25	0.25	0.12	0.16	0.13	0.03	0.03	0.05
234374	Ddx49	0.29	0.4	0.29	0.25	0.23	0.09	0.09	0.1	0.05
56321	Aatf	0.48	0.38	0.85	0.16	0.64	0.08	0.09	0.12	0.27
74035	Nol9	0.33	0.42	0.32	0.37	0.22	0.05	0.16	0.06	0.1
27377	Yme1l1	0.27	2.1	0.47	0.62	0.44	0.09	0.12	0.3	0.35
13435	Dnmt3a	0.86	1.5	0.44	0.31	0.5	0.16	0.49	0.06	0.08
20602	Ncor2	0.39	0.59	0.4	0.26	0.33	0.09	0.19	0.04	0.11
68510	Ints1	0.21	0.3	0.13	0.04	0.15	0.03	0.03	0.06	0.06
76267	Fads1	0.09	0.5	0.57	0.88	0.61	0.07	0.29	0.09	0.11
18992	Pou3f2	0.98	1.2	0.63	0.56	0.6	0.44	0.23	0.05	0.1
18569	Pdcd4	3.4	2.7	1.4	1.6	3.1	0.52	1.1	0.31	0.57
269252	Gtf3c4	0.54	0.63	0.75	0.61	0.74	0.17	0.23	0.13	0.14
208628	Kntc1	0.12	0.14	0.12	0.09	0.07	0.02	0.01	0.03	0.05
68631	Cryl1	0.25	0.36	5e-05	0.04	4.8	14.8	3.6	7.4	55.6
16571	Kif4	0.2	0.35	1.4	0.96	0.75	0.21	0.16	0.22	0.34
19777	Uri1	0.25	0.24	0.59	0.26	0.85	0.03	0.31	0.1	0.07
100019	Mdn1	0.07	0.1	0.13	0.06	0.09	0.01	0.06	0.04	0.02
101966	D8Ertd738e	0.4	0.28	0.7	0.73	0.57	5e-05	5e-05	5e-05	0.35
218885	Oxnad1	0.17	0.12	0.05	0.03	0.02	5e-05	5e-05	0.05	5e-05
83814	Nedd4l	2.1	2.3	1.1	2.5	2.1	1.6	1.4	1	0.76
22631	Ywhaz	208	189	198	260	229	227	251	305	283
20194	S100a10	1.3	5e-05	5e-05	0.4	2	10.5	7.8	61.5	10.5
68493	Ndufaf4	5e-05	0.05	0.03	5e-05	5e-05	0.06	0.05	0.06	0.09
68276	Toe1	0.34	0.42	0.64	0.6	0.72	0.25	0.44	0.29	0.39
13191	Dctn1	3.4	2.4	2.6	3	3.2	1.4	1.9	2	2.7
26896	Med14	0.1	0.14	0.11	0.07	0.02	5e-05	0.002	0.03	5e-05
229906	Gtf2b	1.7	1.8	1.3	1.8	1.3	0.3	0.94	0.55	0.1
75956	Srrm2	3.2	2.8	2.4	2.4	2.4	2.5	1.8	1.3	1.4
78891	Scyl1	0.12	0.12	0.07	0.09	0.09	0.03	0.06	0.07	0.02
67981	Hormad1	0.28	0.23	0.06	0.28	0.08	5e-05	0.13	5e-05	5e-05
53317	Plrg1	2.2	1.7	1.5	0.99	1.8	0.92	0.62	0.77	1.5
14115	Fbln2	5e-05	0.06	0.02	0.09	0.09	0.14	1.2	3.1	0.38
20637	Snrnp70	16.6	16.7	18.2	15.6	18.5	13	15	9.5	8
286940	Flnb	0.79	0.94	2.1	1.1	1.1	2.4	1.3	4.8	2.6
15353	Hmg20b	0.27	0.3	0.39	0.05	0.24	5e-05	5e-05	5e-05	0.18
225745	Haus1	1.7	5e-05	0.36	0.3	0.26	5e-05	0.03	5e-05	5e-05
71885	Faap100	0.78	0.4	0.41	0.18	0.79	1.4	1.1	0.65	0.84
269470	Wdr3	0.31	0.51	0.52	0.32	0.56	0.31	0.29	0.13	0.27
19241	Tmsb4x	974	508	952	1196	1406	1188	1754	1560	1676
20928	Abcc9	0.02	0.02	0.04	0.02	0.02	5e-05	5e-05	5e-05	0.02
66307	Isoc1	6.2	6.9	5	7	5.5	2.8	5.4	4.1	4.4
19340	Rab3d	0.05	5e-05	5e-05	5e-05	13.5	10.7	2.4	0.45	2.1
20200	S100a6	5.2	6.4	4.2	10.7	24.2	13.7	18.4	122	86.7
268936	Brpf3	0.009	0.01	0.02	0.006	0.18	0.02	5e-05	5e-05	5e-05
216987	Utp6	0.27	0.68	0.45	0.45	0.3	0.19	0.18	0.15	0.03
20068	Rps17	53.7	74.6	76.6	84.3	70.5	56.8	40.9	62.6	56.4
14972	H2-K1	0.2	5e-05	0.34	0.04	0.37	1.4	1.7	8.2	5.1
54130	Actr1a	8.5	9.6	8.5	9.8	12.8	5.5	5.3	6.3	9.7
72199	Mms19	0.09	0.13	0.09	0.08	0.08	0.06	0.03	0.01	0.04
227723	Prrc2b	0.11	0.14	0.17	0.1	0.16	0.06	0.03	0.12	0.05
19291	Purb	9.7	8.5	15.7	12.9	15.2	8.2	7.2	7.6	11.1
67264	Ndufb8	4.5	5.2	2.7	3.5	4.4	0.93	2.5	1	3
22003	Tpm1	14.3	11.3	7.9	32	10.7	126	34.3	223	20.8
68089	Arpc4	25.6	24.1	11.5	16.8	12.1	30.6	20.6	27.6	29.8
18645	Pfn2	11.7	8.1	4.4	5.8	8.6	11.5	12.1	9	19.1
52575	Trmt10c	0.33	0.86	0.21	2.9	0.26	0.11	0.37	0.11	0.07
108062	Cstf2	3.7	4.1	3.2	2.4	4	2.6	3	1.6	2.2
17997	Nedd1	0.2	0.24	0.46	0.36	0.33	0.25	0.11	0.06	0.16
56215	Acin1	3.4	3.1	4	2.4	3.6	2.6	2.7	2.4	1.6
77604	Rbm12b2	0.005	0.05	0.01	0.06	0.02	0.003	0.006	5e-05	5e-05
103733	Tubg1	2.6	3.9	2	1.7	2	1.1	1.8	1.3	1.9
114863	Prosc	1.6	1.7	1.4	1.4	2.2	1.6	3.6	3.5	3.4
72475	Ssbp3	0.3	0.37	0.52	0.36	0.55	0.26	0.05	0.07	0.23
70612	Tmem230	0.21	0.21	0.26	0.27	0.81	5e-05	5e-05	0.29	5e-05
245877	Map7d1	0.57	0.48	0.42	0.67	0.39	0.6	0.88	0.57	0.73
56424	Stub1	0.83	1	1	1.1	0.8	0.5	0.87	0.51	0.73
17120	Mad1l1	0.12	0.13	0.33	0.34	0.27	0.13	0.13	0.13	0.09
17159	Man2b1	0.03	0.04	0.02	0.09	0.22	0.05	0.79	0.93	0.81
59069	Tpm3	49.9	38.5	87.2	78.6	91.2	86.4	88.9	155	113
15161	Hcfc1	3.2	3.3	3.5	2.6	4.4	2.2	2.5	2.5	3.2
29812	Ndrg3	3.1	2.6	1.9	2.4	1.9	1.3	2.3	1.6	1.4
69748	Aldh16a1	0.25	0.47	0.67	0.72	0.51	0.12	0.18	0.45	0.24
28071	Twistnb	0.03	0.1	0.04	0.11	0.11	5e-05	5e-05	0.07	5e-05
216344	Rab21	0.81	0.87	0.68	0.51	1.1	1	1	2.4	2
64655	Mrps22	0.38	0.3	0.54	0.27	0.47	0.17	0.18	0.09	0.34
12389	Cav1	0.12	5e-05	0.37	0.21	0.1	2.1	1.1	11.5	1.5
12727	Clcn4-2	5e-05	5e-05	5e-05	5e-05	5e-05	0.01	5e-05	0.009	0.009
57869	Adck2	5e-05	5e-05	5e-05	5e-05	5e-05	0.07	0.05	0.06	5e-05
69574	Cmbl	5e-05	5e-05	5e-05	5e-05	5e-05	0.08	5e-05	0.11	0.11
22151	Tubb2a	6.3	4.6	0.11	8.1	7.3	11.8	11.8	121	33.6
329679	Fnip2	5e-05	5e-05	5e-05	5e-05	5e-05	0.56	0.38	0.7	5e-05
69908	Rab3b	5e-05	5e-05	5e-05	5e-05	5e-05	11.4	25.9	5e-05	9.6
100101807	1700047I17Rik2	5e-05	5e-05	5e-05	5e-05	5e-05	5e-05	0.35	0.17	0.21
71279	Slc29a3	5e-05	5e-05	5e-05	5e-05	5e-05	5e-05	0.04	0.07	0.07
22380	Wbp4	0.7	0.42	0.84	0.59	0.47	0.26	0.57	0.17	0.27
54357	Epb41l4b	5e-05	5e-05	5e-05	5e-05	5e-05	0.008	5e-05	0.007	0.005
12721	Coro1a	0.8	0.1	0.58	2.3	1.4	1.1	2.4	7.4	5.8
224617	Tbc1d24	0.41	0.37	0.14	0.33	0.66	0.14	0.26	0.16	0.06
270084	Lpcat2	5e-05	5e-05	5e-05	5e-05	5e-05	5e-05	0.11	0.24	0.23
58859	Efemp2	5e-05	5e-05	5e-05	5e-05	5e-05	5e-05	0.13	0.11	0.06
29817	Igfbp7	5e-05	0.01	0.05	5e-05	0.08	0.09	0.07	0.47	0.33
66120	Fkbp11	5e-05	5e-05	5e-05	5e-05	5e-05	5e-05	0.21	0.68	0.38
380730	Gm884	5e-05	5e-05	5e-05	5e-05	5e-05	0.07	0.17	5e-05	0.18
57230	Sap30bp	0.26	0.42	0.89	0.22	0.48	5e-05	5e-05	0.44	5e-05
18081	Ninj1	5e-05	5e-05	5e-05	5e-05	5e-05	0.26	0.08	0.11	5e-05
11668	Aldh1a1	5e-05	5e-05	5e-05	5e-05	5e-05	0.45	5e-05	2.2	1.4
236573	Gbp9	5e-05	5e-05	5e-05	5e-05	5e-05	0.04	5e-05	0.11	0.04
226527	BC026585	5e-05	5e-05	5e-05	5e-05	5e-05	0.08	5e-05	0.3	0.2
22329	Vcam1	5e-05	5e-05	5e-05	5e-05	5e-05	5e-05	0.06	0.22	0.12
217847	Serpina10	5e-05	5e-05	5e-05	5e-05	5e-05	0.03	0.08	5e-05	0.03
30935	Tor3a	5e-05	5e-05	5e-05	5e-05	5e-05	0.04	0.03	0.1	5e-05
22596	Xrcc5	2.1	2.5	1.7	1.9	1.5	1.2	1.6	0.5	0.74
244810	AW551984	0.03	0.06	0.03	0.007	0.03	0.03	0.08	0.24	0.23
23972	Papss2	5e-05	5e-05	5e-05	5e-05	5e-05	0.18	5e-05	0.25	0.99
56448	Cyp2d22	5e-05	5e-05	5e-05	5e-05	5e-05	0.06	5e-05	0.25	0.26
18951	Sept5	0.35	0.09	0.53	0.14	0.78	0.49	0.59	1.6	3.3
233900	Rnf40	0.37	0.56	0.57	0.68	0.82	0.28	0.59	0.26	0.21
106869	Tnfaip8	1.5	0.97	0.27	0.8	1.3	5e-05	1	5e-05	5e-05
76184	Abca6	5e-05	5e-05	5e-05	5e-05	5e-05	5e-05	0.01	0.02	0.006
105670	Rcbtb2	0.12	0.17	0.14	0.18	0.12	5e-05	0.16	5e-05	5e-05
17306	Sypl2	5e-05	5e-05	5e-05	5e-05	5e-05	0.21	5e-05	0.46	0.07
64685	Nmi	5e-05	0.34	0.04	5e-05	5e-05	0.11	0.25	0.14	0.19
19285	Ptrf	0.1	5e-05	0.38	0.3	0.86	3.9	2.9	18	4.1
105855	Nckap1l	5e-05	5e-05	5e-05	5e-05	5e-05	0.1	5e-05	0.08	0.02
98386	Lbr	7.4	5	9.2	11.1	11.6	7.6	5.3	5.2	3.8
209630	Frmd4a	0.23	0.16	0.1	0.26	0.59	0.12	0.17	0.04	0.05
13004	Ncan	0.05	0.04	5e-05	0.02	0.22	0.25	0.21	1.4	1.3
53311	Mybph	5e-05	5e-05	5e-05	5e-05	5e-05	0.24	1.6	0.18	5e-05
216516	Ccdc157	5e-05	5e-05	5e-05	0.75	5e-05	0.07	0.33	0.23	0.002
20333	Sec22b	6.9	6.7	9.6	5	7.4	9.5	7.6	11.3	15
59012	Moxd1	5e-05	5e-05	5e-05	5e-05	5e-05	0.53	0.18	0.06	5e-05
13018	Ctcf	0.73	0.68	1.8	1.2	1.2	0.35	0.65	0.93	0.47
17207	Mcf2l	5e-05	5e-05	5e-05	5e-05	5e-05	5e-05	0.19	0.34	0.04
20088	Rps24	41.3	48.7	55.7	57.3	47.9	42.1	42.3	34.6	46.5
18034	Nfkb2	5e-05	5e-05	5e-05	5e-05	5e-05	5e-05	0.02	0.03	0.13
27886	Dgcr14	0.04	5e-05	0.03	0.02	0.03	5e-05	0.006	5e-05	5e-05
12874	Cpd	0.03	0.19	0.07	0.06	0.02	5e-05	5e-05	0.01	0.01
407800	Ecm2	5e-05	5e-05	5e-05	5e-05	5e-05	0.15	5e-05	0.1	0.02
12334	Capn2	0.42	0.39	0.39	0.65	0.71	0.9	0.56	2	2.1
67451	Pkp2	5e-05	5e-05	5e-05	5e-05	5e-05	0.04	5e-05	0.31	0.36
56520	Nme4	0.35	0.38	0.63	0.21	0.02	5e-05	0.3	5e-05	5e-05
17357	Marcksl1	35.8	27.2	49.6	49.9	55.2	32.2	33.1	27.7	16.9
19951	Rpl32	17	17	18.8	13.8	20.2	19.3	19.6	20	23.2
16468	Jarid2	5e-05	5e-05	5e-05	5e-05	5e-05	5e-05	0.24	0.03	0.04
17155	Man1a	0.2	0.24	0.16	0.07	0.16	0.18	0.25	0.42	0.38
18477	Prdx1	137	137	121	161	131	177	161	138	182
19079	Prkab1	0.26	0.3	5e-05	5e-05	5e-05	0.42	0.27	0.37	0.38
55983	Pdzrn3	5e-05	5e-05	5e-05	5e-05	5e-05	5e-05	0.02	0.004	0.007
11772	Ap2a2	2.1	1.9	1.1	2.7	1.6	2.7	2.7	3.8	2.1
11429	Aco2	24.1	25.4	13	18.5	22.7	34.9	27.8	23.7	26.8
19230	Twf1	3.6	3.8	3.1	5.5	4.5	5.1	4.5	6.8	8.6
100340	Smpdl3b	5e-05	5e-05	5e-05	5e-05	5e-05	0.008	5e-05	0.06	0.02
16467	Atcay	5e-05	5e-05	5e-05	5e-05	5e-05	0.009	5e-05	0.007	0.04
217431	Nol10	0.25	0.42	0.26	0.16	0.1	0.18	0.08	0.04	0.02
21356	Tapbp	5e-05	5e-05	5e-05	5e-05	5e-05	5e-05	0.05	0.67	0.56
56741	Igdcc4	0.02	0.11	0.03	0.02	0.02	5e-05	5e-05	5e-05	0.04
78394	Ddx52	0.37	0.45	0.35	0.12	0.32	0.04	0.03	5e-05	5e-05
18045	Nfyb	1.6	1.2	1.2	0.53	1.3	5e-05	1.5	5e-05	5e-05
54403	Slc4a4	5e-05	5e-05	5e-05	5e-05	5e-05	0.03	5e-05	0.41	0.08
209378	Itih5	5e-05	5e-05	5e-05	5e-05	5e-05	0.004	5e-05	0.02	0.005
66384	Srp19	0.63	0.93	1.1	1.1	0.95	0.13	0.3	0.89	0.15
50917	Galns	5e-05	5e-05	5e-05	5e-05	5e-05	0.06	0.06	0.71	5e-05
71177	Asun	0.16	0.35	0.12	0.95	0.94	0.22	0.06	0.16	0.07
98758	Hnrnpf	70.3	81.5	119	113	141	74.8	63.9	66.4	88.8
229285	Spg20	0.13	0.37	0.94	0.92	0.22	0.007	0.03	0.09	0.26
66624	Spcs2	3.4	4.2	2.1	2.4	2.8	3.8	3.3	4.4	4.6
21816	Tgm1	5e-05	5e-05	5e-05	5e-05	5e-05	5e-05	0.11	2.6	0.19
246703	Apoa1bp	2.5	2.7	1.5	1.4	2.5	3.8	2.6	3.2	2.5
72560	Naalad2	5e-05	5e-05	5e-05	5e-05	5e-05	5e-05	11.5	0.44	0.37
67134	Nop56	10.4	11.6	9.4	9.6	11	10.3	7.7	6	6.6
83704	Slc12a9	0.1	0.19	5e-05	5e-05	0.02	0.29	0.1	0.95	0.75
59092	Pcbp4	1.6	1.5	1.6	2.1	2.6	1.2	1.4	1.2	0.54
104174	Gldc	0.04	0.04	0.62	0.09	0.01	5e-05	5e-05	5e-05	0.1
237943	Gpatch8	0.07	0.03	0.1	0.07	0.04	0.007	0.04	0.006	0.03
70893	Glb1l3	5e-05	5e-05	5e-05	5e-05	5e-05	0.03	5e-05	0.1	0.63
14569	Gdi2	49.4	49.6	38.7	42.8	40.9	58.7	65.9	45.3	52.1
218914	Wapl	0.31	0.29	0.41	0.32	3.1	0.18	0.13	0.13	0.25
21804	Tgfb1i1	5e-05	5e-05	5e-05	5e-05	5e-05	0.005	0.02	0.05	5e-05
27681	Snf8	0.31	0.59	0.31	0.15	0.12	0.72	0.43	0.59	0.4
54380	Smarcal1	0.08	0.07	0.13	0.16	0.04	5e-05	0.12	5e-05	5e-05
78751	Zc3h6	0.22	0.17	0.29	0.47	0.45	5e-05	5e-05	0.43	5e-05
218811	Sec24c	0.92	0.85	0.76	0.81	0.95	1.1	1.1	0.91	1.5
15958	Ifit2	5e-05	5e-05	5e-05	5e-05	5e-05	5e-05	0.02	0.3	0.36
71943	Tom1l1	0.68	0.52	0.23	0.13	0.27	5e-05	5e-05	0.05	0.03
382044	Ces1b	21.3	36.7	13.1	20.2	27.3	28.6	54	31.7	35.3
18424	Otx2	0.56	0.41	0.28	0.45	0.27	0.32	0.26	0.23	0.26
11818	Apoh	0.63	0.75	5e-05	5e-05	5e-05	0.85	1.3	0.97	0.36
65114	Vps35	6.2	6.9	3.6	4.9	5.4	5.9	10.1	6.5	8.9
20832	Ssr4	5.2	6.3	5.1	5.3	6.6	9	6.4	17.7	10.5
66050	0610009B22Rik	5e-05	5e-05	5e-05	5e-05	5e-05	0.08	0.1	5e-05	2.1
240505	Cdc42bpg	5e-05	5e-05	5e-05	5e-05	5e-05	0.02	0.13	0.55	5e-05
12361	Cask	0.39	0.22	0.09	0.25	0.2	0.22	0.47	0.75	0.52
67871	Mrrf	0.89	1.1	1.5	1	1	0.86	0.74	0.37	0.26
627872	Dnah7a	5e-05	5e-05	5e-05	5e-05	5e-05	0.01	0.003	5e-05	0.03
70918	Nsun7	0.14	0.18	0.09	0.11	0.1	0.06	5e-05	5e-05	0.004
22436	Xdh	5e-05	5e-05	5e-05	5e-05	5e-05	5e-05	0.02	0.44	0.04
212880	Ddx46	1.8	2.2	1.4	1.3	1.4	0.95	1.6	0.71	0.94
15978	Ifng	0.24	0.36	0.62	0.47	0.75	5e-05	5e-05	0.72	5e-05
73945	Otud4	0.08	0.17	0.21	0.11	0.31	0.02	0.17	0.04	0.02
18117	Emc8	2.1	3.1	1.8	3.1	4.3	2.1	2.2	1.7	1.2
72754	Arhgef10l	5e-05	5e-05	5e-05	5e-05	5e-05	5e-05	0.24	0.08	0.01
58916	Myot	5e-05	5e-05	5e-05	5e-05	5e-05	2	5e-05	0.97	0.04
224805	Aars2	0.02	0.02	0.02	0.01	0.05	5e-05	0.03	5e-05	5e-05
14957	Hist1h1d	386	385	474	358	650	398	340	194	231
59001	Pole3	3.3	3.4	3.6	3.3	2.6	1.9	2.8	1.2	0.77
11966	Atp6v1b2	8.2	5.5	4.1	6	7	7.2	12.1	7	9.9
68705	Gtf2f2	0.4	0.35	1.6	1.3	1.4	0.34	0.28	0.41	0.48
229534	Pbxip1	5e-05	5e-05	5e-05	5e-05	5e-05	0.35	5e-05	0.86	0.02
18072	Nhlh2	0.55	0.32	0.16	0.37	0.39	5e-05	0.55	5e-05	5e-05
20650	Sntb2	5e-05	5e-05	5e-05	5e-05	5e-05	5e-05	0.01	0.28	0.05
20538	Slc6a2	0.13	0.24	0.12	0.2	0.05	5e-05	0.21	5e-05	5e-05
67980	Gnpda2	0.94	0.86	0.25	0.18	0.56	0.77	1.3	1.2	0.96
66583	Exosc1	0.33	0.33	0.08	0.11	0.06	0.24	5e-05	5e-05	5e-05
65973	Asph	3.2	2.9	2.3	2.5	2.7	4.7	3.9	13.4	4.7
234214	Sorbs2	5e-05	5e-05	5e-05	5e-05	5e-05	5e-05	0.01	0.31	0.05
15354	Hmgb3	76.7	73	99.9	75.8	79.1	63.3	60.7	27.7	50.1
56692	Lamtor3	2.2	2.2	0.93	0.06	0.15	3.6	4.8	1.8	3.2
13476	Reep5	1.5	1.3	1.8	1.4	2.6	2.2	2.7	10.6	7.8
107976	Bre	0.26	0.3	1	0.76	1.1	0.16	0.44	0.3	0.21
69710	Arap1	5e-05	5e-05	5e-05	5e-05	5e-05	5e-05	0.009	0.22	0.02
16332	Inppl1	0.03	0.05	0.21	0.08	0.05	5e-05	5e-05	5e-05	0.11
26399	Map2k6	5.5	3.9	0.56	2.2	2.1	0.66	0.97	0.17	1.3
20639	Snrpb2	4.7	4.8	6.3	6.6	5.1	2	3.4	3.9	4.7
67207	Lsm1	0.77	0.51	0.32	0.12	0.11	0.8	1.6	0.38	0.79
71702	Cdc5l	5.8	6.9	7.7	6.9	11.7	3.1	2.3	3.4	8
18807	Pld3	0.17	0.17	0.17	0.44	0.4	0.36	1.2	0.87	0.32
51812	Mcrs1	5e-05	5e-05	0.02	0.02	0.02	5e-05	5e-05	5e-05	5e-05
72338	Wdr89	5e-05	5e-05	0.06	0.06	0.06	5e-05	5e-05	5e-05	5e-05
12544	Cdc45	5e-05	0.04	5e-05	0.04	0.04	5e-05	5e-05	5e-05	5e-05
18294	Ogg1	0.03	0.03	5e-05	5e-05	0.03	5e-05	5e-05	5e-05	5e-05
382252	A830080D01Rik	5e-05	5e-05	0.02	0.02	0.02	5e-05	5e-05	5e-05	5e-05
83398	Ndst3	5e-05	0.28	0.27	0.29	5e-05	5e-05	5e-05	5e-05	5e-05
20439	Siah2	5e-05	3.2	5e-05	3.1	2.8	5e-05	5e-05	5e-05	5e-05
13605	Ect2	5e-05	0.06	0.05	5e-05	0.06	5e-05	5e-05	5e-05	5e-05
72026	Trmu	5e-05	5e-05	0.05	0.06	0.05	5e-05	5e-05	5e-05	5e-05
17190	Mbd1	5e-05	5e-05	0.05	0.04	0.04	5e-05	5e-05	5e-05	5e-05
109115	Supt3	5e-05	5e-05	0.09	0.12	0.11	5e-05	5e-05	5e-05	5e-05
20529	Slc31a1	0.49	0.71	0.6	5e-05	5e-05	5e-05	5e-05	5e-05	5e-05
20319	Sfrp2	0.08	0.11	5e-05	0.1	5e-05	5e-05	5e-05	5e-05	5e-05
68564	Nufip2	0.24	0.28	0.73	0.4	0.56	0.3	0.22	0.09	0.24
24030	Mrps12	5e-05	5e-05	0.07	0.09	0.1	5e-05	5e-05	5e-05	5e-05
51960	Kctd18	0.03	0.03	5e-05	5e-05	0.04	5e-05	5e-05	5e-05	5e-05
241490	Rbm45	0.07	5e-05	0.09	0.06	5e-05	5e-05	5e-05	5e-05	5e-05
69752	Zfp511	5e-05	0.04	0.06	0.05	5e-05	5e-05	5e-05	5e-05	5e-05
18213	Ntrk3	0.28	0.35	5e-05	0.2	5e-05	5e-05	5e-05	5e-05	5e-05
18600	Padi2	0.04	0.03	5e-05	0.02	0.02	0.55	0.01	1.8	31.4
103677	Smg6	5e-05	5e-05	0.007	0.009	0.01	5e-05	5e-05	5e-05	5e-05
231238	Sel1l3	5e-05	5e-05	0.03	0.02	0.03	5e-05	5e-05	5e-05	5e-05
29806	Limd1	0.02	5e-05	0.03	5e-05	0.02	5e-05	5e-05	5e-05	5e-05
329934	Foxo6	0.05	0.03	5e-05	5e-05	0.04	5e-05	5e-05	5e-05	5e-05
72844	Kctd17	0.04	0.05	5e-05	5e-05	0.03	5e-05	5e-05	5e-05	5e-05
114565	Zbtb21	5e-05	5e-05	0.007	0.01	0.01	5e-05	5e-05	5e-05	5e-05
216527	Ccm2	0.05	0.05	5e-05	5e-05	0.03	5e-05	5e-05	5e-05	5e-05
13857	Epor	0.14	0.08	5e-05	5e-05	0.07	5e-05	5e-05	5e-05	5e-05
69726	Smyd3	0.04	0.08	0.06	5e-05	5e-05	5e-05	5e-05	5e-05	5e-05
69535	Ten1	5e-05	5e-05	0.1	0.17	0.08	5e-05	5e-05	5e-05	5e-05
11448	Chrne	5e-05	0.18	5e-05	0.4	0.38	5e-05	5e-05	5e-05	5e-05
20666	Sox11	5e-05	5e-05	0.03	0.06	0.05	5e-05	5e-05	5e-05	5e-05
20682	Sox9	5e-05	0.23	0.13	5e-05	0.1	5e-05	5e-05	5e-05	5e-05
20663	Sos2	0.02	0.03	5e-05	0.04	5e-05	5e-05	5e-05	5e-05	5e-05
237898	Usp32	5e-05	0.02	0.03	0.04	5e-05	5e-05	5e-05	5e-05	5e-05
93884	Pcdhb13	5e-05	5e-05	0.04	0.03	0.02	5e-05	5e-05	5e-05	5e-05
99730	Taf13	5e-05	0.04	0.02	0.03	5e-05	5e-05	5e-05	5e-05	5e-05
56364	Zmym3	5e-05	5e-05	0.03	0.04	0.02	5e-05	5e-05	5e-05	5e-05
57441	Gmnn	5e-05	5e-05	5e-05	5e-05	5e-05	19.7	0.08	4	5e-05
69399	1700025G04Rik	5e-05	5e-05	0.11	0.06	0.05	5e-05	5e-05	5e-05	5e-05
244579	Tox3	5e-05	5e-05	0.17	0.41	0.4	5e-05	5e-05	5e-05	5e-05
23836	Cdh20	5e-05	5e-05	0.04	0.09	0.07	5e-05	5e-05	5e-05	5e-05
227333	Dgkd	5e-05	0.12	0.05	0.08	5e-05	5e-05	5e-05	5e-05	5e-05
208869	Dock3	0.02	0.03	0.006	0.004	0.02	5e-05	5e-05	0.02	5e-05
12211	Birc6	0.37	0.36	0.36	0.35	0.21	0.27	0.26	0.15	0.23
67276	Eri1	0.39	0.66	0.43	0.52	0.31	5e-05	0.84	5e-05	5e-05
71941	Cars2	0.1	0.14	5e-05	5e-05	0.27	5e-05	5e-05	5e-05	5e-05
22288	Utrn	5e-05	5e-05	0.11	0.01	5e-05	0.01	0.01	0.26	0.08
66213	Med7	5e-05	0.07	5e-05	0.19	0.12	5e-05	5e-05	5e-05	5e-05
72400	Pinx1	5e-05	5e-05	0.3	0.12	0.12	5e-05	5e-05	5e-05	5e-05
218793	Ube2e2	1.7	0.93	1.4	4.7	1	0.37	5e-05	5e-05	0.06
19023	Ppef2	0.09	0.1	5e-05	0.04	5e-05	5e-05	5e-05	5e-05	5e-05
56335	Mettl3	5e-05	0.02	0.02	0.01	5e-05	5e-05	5e-05	5e-05	5e-05
20937	Suv39h1	5e-05	5e-05	0.07	0.03	0.03	5e-05	5e-05	5e-05	5e-05
20517	Slc22a1	0.36	0.29	0.11	5e-05	5e-05	5e-05	5e-05	5e-05	5e-05
18571	Pdcd6ip	1.3	1	1.1	2.2	2.1	1.7	2.4	2.9	2.1
229603	Otud7b	0.008	5e-05	0.005	5e-05	0.004	5e-05	5e-05	5e-05	5e-05
50876	Tmod2	1.9	0.72	0.79	1.3	1.5	1.9	1.3	2.2	3.3
76438	Rftn1	1.1	1.1	0.74	0.85	1	0.55	1	0.56	0.54
78243	9230112D13Rik	5e-05	5e-05	0.6	2.8	2	5e-05	5e-05	5e-05	5e-05
71793	Ints12	5e-05	5e-05	0.05	0.12	0.16	5e-05	5e-05	5e-05	5e-05
66067	Gtpbp8	0.11	0.24	5e-05	5e-05	0.07	5e-05	5e-05	5e-05	5e-05
50767	Pnpla6	0.02	0.009	5e-05	0.02	5e-05	5e-05	5e-05	5e-05	5e-05
226098	Hectd2	5e-05	0.009	0.02	0.02	5e-05	5e-05	5e-05	5e-05	5e-05
17127	Smad3	5e-05	5e-05	0.09	0.33	0.22	5e-05	5e-05	5e-05	5e-05
68121	Cep70	0.27	5e-05	0.84	0.21	5e-05	5e-05	5e-05	5e-05	5e-05
244745	Dpy19l1	0.02	5e-05	5e-05	0.06	0.04	5e-05	5e-05	5e-05	5e-05
26429	Orc5	0.04	0.06	5e-05	5e-05	0.02	5e-05	5e-05	5e-05	5e-05
12153	Bmp1	0.11	5e-05	0.45	5e-05	0.16	5e-05	5e-05	5e-05	5e-05
83815	Cenpq	5e-05	0.1	0.08	0.03	5e-05	5e-05	5e-05	5e-05	5e-05
23955	Nek4	5e-05	0.008	0.009	0.02	5e-05	5e-05	5e-05	5e-05	5e-05
26462	Txnrd2	5e-05	5e-05	5e-05	5e-05	0.001	0.15	5e-05	0.05	0.26
74570	Zkscan1	5e-05	5e-05	0.008	0.02	0.02	5e-05	5e-05	5e-05	5e-05
232933	Ccdc61	5e-05	0.02	0.03	0.01	5e-05	5e-05	5e-05	5e-05	5e-05
75991	Slain2	0.09	0.11	0.02	0.08	0.02	5e-05	0.09	5e-05	5e-05
84113	Ptov1	5e-05	0.02	5e-05	0.03	0.07	5e-05	5e-05	5e-05	5e-05
78908	Igsf3	5e-05	0.01	0.05	0.05	0.04	5e-05	0.008	5e-05	5e-05
66660	Sltm	1	0.92	0.77	0.78	1.1	0.63	0.79	0.37	0.27
57432	Zc3h8	5e-05	0.02	0.007	5e-05	0.01	5e-05	5e-05	5e-05	5e-05
93840	Vangl2	0.08	0.08	0.008	0.02	0.04	5e-05	0.06	5e-05	5e-05
241589	D430041D05Rik	0.11	0.18	0.22	0.14	0.08	5e-05	0.05	5e-05	0.01
66439	Borcs7	5e-05	5e-05	0.54	0.11	0.14	5e-05	5e-05	5e-05	5e-05
80751	Rnf34	5e-05	0.02	5e-05	0.08	0.04	5e-05	5e-05	5e-05	5e-05
50794	Klf13	5e-05	5e-05	0.42	0.09	0.11	5e-05	5e-05	5e-05	5e-05
16403	Itga6	5e-05	5e-05	5e-05	5e-05	5e-05	0.01	5e-05	0.61	0.3
67661	Ift172	5e-05	5e-05	0.008	0.005	0.003	5e-05	5e-05	5e-05	5e-05
170760	Acbd3	0.65	0.44	0.23	0.53	0.84	0.6	0.77	1.5	2.2
66942	Ddx18	1.6	2.1	2.3	1.9	1.6	1.5	1.8	1.5	1.2
170643	Kirrel	5e-05	5e-05	0.006	0.01	0.02	5e-05	5e-05	5e-05	5e-05
233913	BC017158	0.02	5e-05	5e-05	0.07	0.02	5e-05	5e-05	5e-05	5e-05
242466	Zfp462	0.009	0.07	0.02	0.11	0.16	5e-05	5e-05	0.02	0.006
67840	Mrpl57	0.34	5e-05	0.13	5e-05	1	5e-05	5e-05	5e-05	5e-05
101320	Dyrk4	5e-05	0.04	0.02	5e-05	0.01	5e-05	5e-05	5e-05	5e-05
237823	Pfas	3.4	2.6	2.4	2.7	2.9	2.2	2.2	1.3	2.3
12950	Hapln1	5e-05	5e-05	5e-05	5e-05	5e-05	0.17	5e-05	0.009	0.62
268301	Sowahc	5e-05	5e-05	0.03	0.04	0.01	5e-05	5e-05	5e-05	5e-05
208836	Fanci	0.009	0.05	0.03	0.01	0.11	5e-05	5e-05	5e-05	0.05
71914	Antxr2	5e-05	0.4	5e-05	0.06	0.11	5e-05	5e-05	5e-05	5e-05
19141	Lgmn	0.79	0.59	5e-05	5e-05	5e-05	1.6	2.2	0.27	0.15
72167	Thumpd2	5e-05	0.009	0.009	0.03	5e-05	5e-05	5e-05	5e-05	5e-05
319939	Tns3	0.04	5e-05	5e-05	0.006	0.13	0.1	0.04	0.11	0.6
21825	Thbs1	5e-05	5e-05	5e-05	5e-05	5e-05	5e-05	0.45	0.62	0.01
14246	Flg	5e-05	0.006	0.004	5e-05	0.002	5e-05	5e-05	5e-05	5e-05
329015	Atg2a	0.03	5e-05	0.02	0.007	5e-05	5e-05	5e-05	5e-05	5e-05
12633	Cflar	0.66	0.15	5e-05	0.08	5e-05	5e-05	5e-05	5e-05	5e-05
22771	Zic1	0.17	0.12	0.11	5e-05	0.2	5e-05	5e-05	0.03	5e-05
12283	Cab39	2.2	1.6	1.2	2.3	1.9	2.2	2.5	2.1	3.1
72739	Zkscan3	0.13	0.2	5e-05	5e-05	0.03	5e-05	5e-05	5e-05	5e-05
195018	Zzef1	5e-05	0.01	0.008	0.03	0.01	5e-05	5e-05	0.004	5e-05
106633	Ift140	0.04	0.02	5e-05	0.03	0.008	0.006	5e-05	5e-05	5e-05
67878	Tmem33	1.7	2.2	0.59	0.74	0.75	1.6	2.2	1.6	2.6
73692	2410089E03Rik	5e-05	5e-05	0.007	0.01	0.03	5e-05	5e-05	5e-05	5e-05
18616	Peg3	5e-05	5e-05	0.01	0.03	0.007	5e-05	5e-05	5e-05	5e-05
319945	Flad1	0.11	0.1	0.15	0.02	0.01	0.15	0.09	0.34	0.29
78246	Phf23	5e-05	5e-05	0.14	0.23	0.03	5e-05	5e-05	5e-05	5e-05
235587	Parp3	5e-05	5e-05	5e-05	5e-05	5e-05	0.01	5e-05	0.26	0.01
74360	Cep57	5e-05	5e-05	0.09	0.14	0.02	5e-05	5e-05	5e-05	5e-05
104401	Pcnxl3	5e-05	5e-05	0.007	0.002	0.004	5e-05	5e-05	5e-05	5e-05
217011	Nle1	0.55	0.49	1.2	0.84	0.67	0.41	0.13	0.41	0.49
240442	Adnp2	5e-05	0.006	0.02	5e-05	0.03	5e-05	5e-05	5e-05	5e-05
118451	Mrps2	0.4	0.64	0.82	0.55	0.63	0.4	0.44	0.43	0.52
17138	Magea2	5e-05	5e-05	0.02	5e-05	5e-05	8.8	60.1	5e-05	13.3
17141	Magea5	5e-05	5e-05	0.02	5e-05	5e-05	8.8	60.1	5e-05	13.3
17144	Magea8	5e-05	5e-05	0.02	5e-05	5e-05	8.8	60.1	5e-05	13.3
108797	Mex3b	0.03	5e-05	0.19	0.03	5e-05	5e-05	5e-05	5e-05	5e-05
77582	Mboat7	5e-05	5e-05	0.0006	5e-05	5e-05	0.05	0.02	0.19	5e-05
224807	Tmem63b	0.01	0.05	5e-05	5e-05	0.06	5e-05	5e-05	5e-05	5e-05
12847	Copa	4.3	4	3	3.4	3.8	4.2	3.8	4.9	5
109905	Rap1a	8.4	9.2	2.4	3.4	6.4	9.5	10	12.6	7.9
11546	Parp2	5e-05	0.02	0.02	0.05	0.12	5e-05	5e-05	0.01	5e-05
244216	Zfp771	5e-05	0.02	0.02	0.05	0.12	0.01	5e-05	5e-05	5e-05
233833	Tnrc6a	0.002	0.002	5e-05	0.006	5e-05	5e-05	5e-05	5e-05	5e-05
226412	R3hdm1	5e-05	5e-05	0.01	0.05	0.01	5e-05	5e-05	5e-05	5e-05
207182	Ggt7	0.2	0.29	0.06	0.19	0.22	0.06	0.09	0.07	0.14
17308	Mgat1	0.07	5e-05	0.01	5e-05	0.02	5e-05	5e-05	5e-05	5e-05
107995	Cdc20	5e-05	5e-05	0.06	0.05	0.009	5e-05	5e-05	5e-05	5e-05
56551	Txn2	0.37	0.14	5e-05	5e-05	5e-05	0.31	0.47	0.19	0.06
100929	Tyw1	5e-05	0.04	0.007	5e-05	0.04	5e-05	5e-05	5e-05	5e-05
69131	Cdk12	0.02	0.01	0.92	0.04	0.01	5e-05	5e-05	0.01	0.01
170716	Cyp4f13	0.03	0.27	5e-05	0.04	5e-05	5e-05	5e-05	5e-05	5e-05
218506	Mrps27	0.53	0.68	0.86	0.52	0.58	0.33	0.61	0.44	0.27
56737	Alg2	1.7	2.3	0.46	0.46	0.74	2.1	1.7	1.5	3.2
52397	Zfp644	0.02	0.01	5e-05	5e-05	0.08	5e-05	5e-05	5e-05	5e-05
66645	Pspc1	6.1	7.1	3.6	4.5	7.9	5.3	3.3	3.5	3.5
69823	Fyttd1	2	1.9	1.4	1.6	2.3	1.3	1.1	0.34	0.95
68988	Prpf31	2.3	2.4	2.4	2.1	2.7	2.1	1.6	0.85	1.5
64213	St7	5e-05	0.01	0.04	5e-05	0.006	5e-05	5e-05	5e-05	5e-05
53895	Clpp	4.5	5.4	3.5	5.1	5	4	4.3	2.6	3
269113	Nup54	1.3	1.5	1.2	1	1.5	0.96	1	1.1	1.2
67713	Dnajc19	0.28	0.04	0.18	0.04	0.14	0.22	5e-05	5e-05	5e-05
225348	Wdr36	0.69	1	0.59	0.48	0.63	0.52	0.47	0.21	0.43
245841	Polr2h	2.2	2.9	1.2	1.9	1.4	0.79	1.8	0.99	1.1
76894	Mettl15	5e-05	0.06	0.03	0.04	0.02	5e-05	5e-05	0.01	5e-05
244349	Kat6a	5e-05	0.02	0.003	5e-05	0.009	5e-05	5e-05	5e-05	5e-05
207607	Ccdc40	5e-05	5e-05	0.38	0.03	0.47	5e-05	5e-05	5e-05	5e-05
77578	Bcl9	0.02	0.003	5e-05	5e-05	0.008	5e-05	5e-05	5e-05	5e-05
226976	Kansl3	0.07	5e-05	0.03	0.007	5e-05	5e-05	5e-05	5e-05	5e-05
18824	Plp2	0.8	0.73	2.1	2.9	2.7	5e-05	5e-05	4.2	5e-05
67161	Sclt1	5e-05	0.03	5e-05	0.23	0.02	5e-05	5e-05	5e-05	5e-05
231506	Lin54	5e-05	0.004	0.02	0.004	5e-05	5e-05	5e-05	5e-05	5e-05
23877	Fiz1	0.27	0.31	0.1	0.23	0.37	5e-05	0.04	0.04	5e-05
51796	Srrm1	2.6	2.9	2	1.8	1.7	2.1	1.6	1.3	1.1
18754	Prkce	5e-05	0.004	0.03	0.02	5e-05	5e-05	5e-05	5e-05	5e-05
229681	St7l	5e-05	0.01	0.04	5e-05	0.005	5e-05	5e-05	5e-05	5e-05
217827	Nrde2	0.009	0.01	0.007	0.67	5e-05	5e-05	0.004	5e-05	5e-05
268697	Ccnb1	5e-05	0.01	0.12	0.08	5e-05	5e-05	5e-05	5e-05	5e-05
66614	Gpatch4	0.02	5e-05	0.04	0.04	0.04	5e-05	5e-05	5e-05	0.01
226604	Gm4847	0.1	0.11	0.21	0.21	0.23	0.09	0.07	0.1	0.15
12258	Serping1	0.79	1.5	0.42	0.38	1.3	1.2	6.7	1.1	3.5
212483	Fam193b	5e-05	5e-05	0.04	0.006	0.06	5e-05	5e-05	5e-05	5e-05
100434	Slc44a1	0.05	0.03	5e-05	5e-05	0.05	0.08	0.07	0.28	0.25
11878	Arx	0.09	0.11	0.06	0.05	0.1	5e-05	0.16	5e-05	5e-05
74026	Msl1	0.06	5e-05	0.07	1.2	5e-05	5e-05	5e-05	5e-05	5e-05
11806	Apoa1	132	178	76.1	79.7	140	155	289	134	210
19334	Rab22a	5e-05	0.15	5e-05	0.01	0.11	5e-05	5e-05	5e-05	5e-05
68032	Emc4	1.9	2.8	1.9	1.8	2.5	0.93	2	1.1	0.46
237459	Cdk17	0.05	0.14	2	0.19	5e-05	5e-05	5e-05	5e-05	0.04
214987	Chtf8	0.39	0.81	1.6	0.96	1.5	5e-05	0.14	0.11	5e-05
13194	Ddb1	4.7	5.3	3.8	5.4	3.9	3.5	4.4	2.5	3.4
11464	Actc1	248	218	148	183	176	997	383	982	202
105663	Thtpa	0.25	0.3	0.16	0.17	0.25	5e-05	0.51	5e-05	5e-05
233887	Zfp553	0.04	0.008	0.14	5e-05	5e-05	5e-05	5e-05	5e-05	5e-05
14390	Gabpa	0.74	0.86	0.96	0.79	1.2	0.56	0.67	0.29	0.72
18605	Enpp1	5e-05	5e-05	5e-05	5e-05	5e-05	5e-05	0.003	0.16	0.12
20815	Srpk1	0.39	0.49	0.5	0.52	0.23	0.19	0.29	0.09	0.31
330230	Zfp853	5e-05	0.03	5e-05	0.54	1.1	5e-05	5e-05	5e-05	5e-05
67533	Ppfibp1	0.02	0.01	0.004	0.003	0.06	0.03	0.03	0.22	0.03
14230	Fkbp10	0.17	5e-05	0.46	0.08	0.09	0.6	1.5	2.6	1.8
217588	Mbip	5e-05	5e-05	0.003	0.03	0.02	5e-05	5e-05	5e-05	5e-05
228889	Ddx27	0.27	0.52	0.61	0.24	0.27	0.29	0.05	0.07	0.21
12617	Cenpc1	0.02	5e-05	0.03	0.006	0.03	5e-05	5e-05	5e-05	0.006
14885	Gtf2h4	0.06	0.08	0.02	5e-05	1.3	5e-05	0.02	5e-05	5e-05
108012	Ap1s2	0.42	0.39	0.14	0.12	0.18	5e-05	0.54	5e-05	5e-05
15512	Hspa2	3.6	2.5	3.7	2.5	3.3	2.1	3.1	2.3	1.9
18707	Pik3cd	5e-05	5e-05	0.006	0.09	0.09	5e-05	5e-05	5e-05	5e-05
384569	Nova2	3	1.7	0.59	2.6	2.6	0.68	1.2	0.83	1
67487	Dhx40	0.35	0.35	0.05	5e-05	0.05	5e-05	0.03	5e-05	5e-05
18538	Pcna	54.6	50.2	63.5	71.1	69.7	47.7	56	24.4	28.6
26874	Abcd2	0.01	5e-05	0.2	5e-05	0.02	5e-05	5e-05	5e-05	5e-05
20324	Sdpr	5.6	6.5	4.5	3.3	3.8	4.1	0.22	1.1	0.95
67157	2610301B20Rik	0.21	0.21	0.38	0.56	0.36	0.04	0.3	0.15	0.06
71148	Mier1	0.005	5e-05	5e-05	0.002	0.02	5e-05	5e-05	5e-05	5e-05
12505	Cd44	5e-05	5e-05	0.44	0.17	0.15	0.51	0.5	2.9	1.1
217737	Ahsa1	7.3	6.7	8.4	9.4	8.4	6.8	6.9	3.8	3.4
17196	Mbp	0.21	5e-05	5e-05	0.38	0.13	1.2	1.1	1.9	0.28
224045	Eif2b5	1	0.95	1.4	1.5	1.5	0.71	1.1	0.66	1.1
106572	Rab31	0.97	1.3	0.09	0.18	1.5	1	1.4	3.8	2.7
26401	Map3k1	0.004	0.02	0.04	0.004	0.04	5e-05	5e-05	0.006	0.004
72543	Mvb12b	0.96	0.79	0.41	1	0.68	0.22	0.16	0.09	0.82
268783	Mtmr12	5e-05	0.02	0.02	0.02	3	5e-05	5e-05	5e-05	0.01
20678	Sox5	0.1	0.05	5e-05	0.006	0.05	5e-05	5e-05	5e-05	0.01
109674	Ampd2	0.26	0.28	0.13	0.22	0.16	0.08	0.12	0.08	0.21
27966	Rrp9	1.6	1.2	0.73	0.46	0.5	0.6	0.4	0.53	0.23
14534	Kat2a	0.008	5e-05	0.03	5e-05	0.3	5e-05	5e-05	5e-05	5e-05
23859	Dlg2	5e-05	5e-05	0.04	0.003	0.06	5e-05	5e-05	5e-05	5e-05
224907	Dus3l	0.58	0.59	0.45	0.6	0.56	0.34	0.58	0.37	0.29
11909	Atf2	0.06	0.04	0.12	0.08	0.17	0.02	5e-05	5e-05	0.02
228980	Taf4a	0.12	0.13	0.07	0.05	0.05	5e-05	0.19	5e-05	5e-05
78266	Zfp687	0.08	0.09	0.18	0.1	0.12	5e-05	0.03	0.02	5e-05
20740	Sptan1	4.9	4.2	4	4	5.6	7.5	4.7	17.9	12.8
18140	Uhrf1	1.1	3.1	2.3	1.5	2	1	1.7	0.5	0.27
12445	Ccnd3	5e-05	0.007	0.3	0.04	5e-05	5e-05	5e-05	5e-05	5e-05
75965	Zdhhc20	5e-05	0.08	0.06	0.09	0.04	5e-05	0.02	5e-05	5e-05
11793	Atg5	5e-05	5e-05	0.21	5e-05	0.25	0.12	0.23	0.36	0.08
20133	Rrm1	4.8	4.3	3.9	3.5	2.6	1.5	3.4	0.35	0.88
19708	Dpf2	1.1	1	1.6	1.9	2.6	0.67	0.78	1.3	1.2
19293	Pvalb	5e-05	5e-05	35.4	2.3	5e-05	7.3	4.4	18.3	2.4
64660	Mrps24	5e-05	0.62	0.32	0.36	0.45	5e-05	5e-05	5e-05	0.1
56275	Rbm14	5.7	6.4	6.4	5.8	8.3	6.1	2.2	3.9	4.1
105246	Brd9	0.01	0.2	0.008	5e-05	5e-05	5e-05	5e-05	5e-05	5e-05
56420	Ppp4c	1.4	1.7	2.2	2.7	2.3	0.46	1.2	1.7	1.1
100952	Emilin1	5e-05	0.87	0.04	5e-05	0.05	0.92	0.31	2.5	0.09
18108	Nmt2	0.26	1	0.77	0.81	1.5	0.34	0.67	0.28	0.28
212163	8030462N17Rik	5e-05	0.44	0.09	0.09	0.13	5e-05	5e-05	0.04	5e-05
78283	Map7d2	5e-05	5e-05	0.008	5e-05	5e-05	0.18	0.51	5e-05	0.09
269529	Fbxo10	5e-05	5e-05	0.008	0.01	0.22	5e-05	5e-05	5e-05	5e-05
56706	Ccnl1	5e-05	5e-05	0.1	5e-05	0.09	0.04	0.14	0.07	0.06
66595	Aste1	0.64	0.65	5e-05	5e-05	0.01	5e-05	5e-05	5e-05	5e-05
70675	Vcpip1	0.19	0.2	0.22	0.22	0.26	0.05	0.05	0.16	0.17
12846	Comt	0.13	0.09	0.03	0.33	0.14	0.13	0.28	0.87	0.41
214489	BC003965	0.4	0.45	0.09	0.42	0.02	0.55	5e-05	5e-05	5e-05
50875	Tmod3	1.4	0.85	2.3	1	2.4	2.1	2.3	3.1	2.1
57376	Smarce1	2.4	3.7	1.4	2.9	2.8	2	2.1	0.99	1.4
27207	Rps11	25.3	32.7	41.7	47.4	41.4	25.3	22.5	27.9	35.5
17258	Mef2a	0.02	0.43	5e-05	0.008	5e-05	5e-05	5e-05	5e-05	5e-05
217463	Snx13	5e-05	5e-05	0.006	0.46	0.05	5e-05	5e-05	5e-05	5e-05
67890	Ufm1	7.4	7.5	6.3	5.9	5.5	7.7	8.2	9.5	16.8
68420	Ankrd13a	0.06	0.02	0.1	0.04	0.13	0.07	0.32	0.16	0.12
20853	Stau1	0.67	0.86	0.91	5.5	1.1	0.71	0.74	0.35	0.42
18032	Nfix	5.4	5.4	2.7	3.6	7.2	4.3	2.7	2.5	2.8
269966	Nup98	1.2	1.7	1.5	1	1.2	1.2	0.45	0.97	0.63
547253	Parp14	5e-05	0.17	0.006	5e-05	0.007	5e-05	5e-05	5e-05	5e-05
12343	Capza2	16.6	17.4	19.7	23.5	23.5	21	24.1	39.4	39.2
77286	Nkrf	0.06	0.06	5e-05	0.17	0.13	0.03	5e-05	5e-05	5e-05
109711	Actn1	2.9	2.7	4.7	3	2.7	9.2	3.8	19.5	5
18969	Pola2	0.8	0.62	0.86	1	0.95	5e-05	0.16	5e-05	0.12
13593	Ebf3	4.6	4.6	4.4	3.9	4.1	3.6	3.2	2.2	3.9
20931	Surf2	0.06	0.08	0.12	0.12	5e-05	0.03	5e-05	5e-05	5e-05
79566	Sh3bp5l	0.06	0.04	0.44	0.05	0.06	0.24	5e-05	5e-05	5e-05
20866	Stim1	5e-05	5e-05	0.01	5e-05	5e-05	0.08	5e-05	0.24	0.14
71919	Rpap3	0.63	0.64	0.63	0.93	0.74	0.43	0.69	0.25	0.44
17939	Naga	0.41	5e-05	5e-05	0.1	0.39	0.52	1.1	1.1	1.3
233276	Tubgcp5	5e-05	5e-05	5e-05	0.02	5e-05	0.25	5e-05	1.8	11.5
50878	Stag3	5e-05	5e-05	5e-05	5e-05	5e-05	0.35	0.13	5e-05	0.002
18655	Pgk1	75.2	72.5	59.8	82.6	76.1	108	97.7	88.1	71.8
101489	Ric8	0.12	0.17	0.11	0.02	0.19	0.16	0.18	0.29	0.56
101185	Pot1a	5e-05	0.12	0.18	0.25	0.05	5e-05	5e-05	5e-05	0.04
70998	Phf6	2.8	3.3	2.9	2.9	2.4	1.6	2.6	0.5	0.93
71775	1300017J02Rik	0.68	1.2	0.14	0.21	0.61	0.69	1.5	0.77	1.8
338467	Morc3	0.01	0.02	0.08	0.08	0.03	5e-05	0.09	5e-05	5e-05
67037	Pmf1	0.34	0.44	0.63	0.6	0.44	0.04	0.19	5e-05	5e-05
56752	Aldh9a1	2.3	2.4	1.3	1.8	2.2	2.1	2.9	2.4	3.2
66235	Eif1ax	6.2	6.6	12.2	14	13.7	6.4	8.6	3.7	6.4
11520	Plin2	0.2	0.09	0.13	0.28	0.88	0.23	2.9	1.2	0.7
76577	Faf2	0.61	0.86	0.11	0.14	0.28	0.77	0.55	0.68	0.96
226601	Gm4846	0.11	0.12	0.23	0.23	0.25	0.1	0.08	0.11	0.17
18028	Nfib	14	13	12	12.4	20.8	12.8	12.1	7.4	9.5
76895	Bicd2	0.13	0.006	5e-05	5e-05	0.22	0.19	0.15	0.21	0.27
75605	Kdm5b	0.02	0.007	0.13	0.004	0.03	5e-05	5e-05	5e-05	0.05
83701	Srrt	1.5	1.5	2.4	2.7	3.3	0.86	1.3	1.5	2
17319	Mif	112	111	79.8	78.3	71.1	166	149	94.5	104
69754	Fbxo7	0.03	0.08	5e-05	0.02	5e-05	0.1	0.15	0.07	0.09
11740	Slc25a5	74.5	84.7	75.3	83.3	98.4	87.5	93.3	99.2	125
30877	Gnl3	1	1.6	1	0.78	0.5	0.77	0.66	0.24	0.2
12262	C1qc	5e-05	5e-05	5e-05	0.03	5e-05	5e-05	0.32	0.36	0.64
20014	Rpn2	10.4	13	5.7	6.5	6.4	13.2	9.7	12.1	10.9
72502	Cwf19l1	0.26	0.31	0.36	0.26	0.31	0.03	0.09	0.21	0.18
11905	Serpinc1	6.9	11.1	2.1	7.3	14.4	10.4	18.7	14.2	16.7
227720	Nup214	0.5	0.8	0.67	0.51	0.67	0.65	0.43	0.32	0.38
100705	Acacb	0.009	0.03	0.03	5e-05	0.04	5e-05	5e-05	5e-05	0.01
19771	Rlbp1	0.42	0.15	5e-05	5e-05	2	3.1	1.4	1.3	3.1
381413	Gpr176	5e-05	5e-05	0.55	0.85	0.005	5e-05	5e-05	5e-05	5e-05
11964	Atp6v1a	6.7	6.5	3.7	5.3	5.1	6.9	10.3	5.8	7.1
114142	Foxp2	5e-05	5e-05	0.03	5e-05	5e-05	0.49	5e-05	0.3	0.33
277939	C2cd3	5e-05	0.002	0.13	5e-05	0.09	5e-05	5e-05	5e-05	5e-05
20222	Sf3a2	4.8	5.4	3.1	3.1	3.5	3.6	2.8	1.4	2.3
60525	Acss2	0.4	0.34	0.89	0.96	1.3	0.04	0.25	0.04	0.67
15204	Herc2	5e-05	0.006	0.04	0.28	0.005	5e-05	5e-05	5e-05	0.007
14081	Acsl1	5e-05	0.08	0.09	0.04	0.04	0.16	0.32	2.1	0.13
23937	Mab21l2	2.5	2.2	1.5	1.7	2.5	1.6	1.7	0.53	0.58
17345	Mki67	2.2	2.7	5.7	3.2	2.8	1.5	2	3	2
103784	Wdr92	0.1	0.2	0.41	0.16	0.12	0.02	0.16	0.09	0.02
209550	Rad51ap2	0.05	5e-05	0.02	0.1	0.11	0.12	0.16	1.2	0.6
22004	Tpm2	5e-05	5e-05	1.5	28.5	5e-05	68.7	0.83	122	0.08
237877	Atad5	0.01	0.006	0.05	0.006	0.04	5e-05	5e-05	0.006	0.006
104099	Itga9	0.07	0.15	0.05	0.07	5e-05	0.03	5e-05	5e-05	5e-05
65961	Utp3	0.73	1.2	0.75	0.78	0.68	0.68	0.56	0.36	0.7
14087	Fanca	0.5	5e-05	0.06	0.003	5e-05	5e-05	5e-05	5e-05	5e-05
277250	Kdm3b	0.13	0.2	0.26	0.26	0.36	0.008	0.04	0.09	0.17
18753	Prkcd	0.02	0.07	5e-05	5e-05	0.06	0.1	0.31	0.19	0.03
69736	Nup37	5.2	7	5.1	6.6	5.5	4.7	5.4	2.3	2.5
233651	Dchs1	0.01	0.02	0.04	0.02	0.02	0.01	0.01	0.02	0.008
59047	Pnkp	6.6	7.2	7	0.67	4	0.27	0.39	5.1	0.68
72749	Tonsl	0.03	0.007	0.03	0.1	0.11	5e-05	0.04	5e-05	0.003
66587	Fastk	5e-05	0.06	0.03	0.04	0.07	5e-05	0.02	5e-05	5e-05
21894	Tln1	2.2	2	4.3	2.7	3.1	3.5	3.2	10.2	7.8
76281	Tax1bp3	3.1	3.2	1.1	3.1	4.1	4.6	6.2	7	2.8
218756	Slc4a7	5e-05	5e-05	0.07	0.03	5e-05	0.02	0.004	0.1	0.14
13036	Ctsh	5e-05	5e-05	5e-05	0.07	5e-05	5e-05	0.65	2.7	0.64
223262	Timm8a2	3.6	2.8	3.2	2.4	2.5	4.1	4.2	3.2	3
84004	Mcam	0.07	0.25	0.52	0.05	0.25	0.87	0.24	2.7	0.32
381091	H2-Eb2	0.29	5e-05	0.19	5e-05	5e-05	1.2	0.38	0.02	0.05
20841	Zfp143	0.22	0.04	0.24	0.15	0.47	0.07	0.03	5e-05	5e-05
66923	Pbrm1	0.62	1	0.73	0.63	0.62	0.45	0.67	0.18	0.15
213541	Ythdf2	1.9	2.5	2.6	4.4	3	2.4	2.4	1.5	1.6
69192	Dhx16	0.23	0.41	0.16	0.36	0.29	0.19	0.21	0.22	0.14
218975	Mapk1ip1l	9.8	11.5	11.6	9.9	7.2	8.7	8.3	3.6	4
67166	Arl8b	5.7	7.9	2.9	2.7	4.8	7.4	6.9	6.6	6.7
78388	Mvp	0.02	0.003	0.18	0.27	0.14	0.1	0.24	1.7	0.61
26932	Ppp2r5e	1.6	2.1	0.91	1.3	1.8	2.4	3	1.4	2.8
29810	Bag3	0.16	0.05	0.27	0.14	0.14	0.11	1.1	2.5	0.53
231600	Chfr	5e-05	5e-05	0.02	5e-05	5e-05	0.11	0.82	0.11	5e-05
12815	Col11a2	5e-05	5e-05	5e-05	5e-05	0.01	0.07	5e-05	0.15	0.03
545428	Ccdc141	0.15	0.14	0.07	0.03	0.04	0.39	0.11	0.59	0.09
13200	Ddost	9	10	5.7	7.6	8.3	11.9	7.4	14.9	13.7
56430	Clip1	5e-05	0.008	0.03	0.05	5e-05	0.04	0.03	0.1	0.07
67865	Rgs10	5e-05	5e-05	5e-05	5e-05	0.04	5e-05	0.12	1	0.71
66403	Asf1a	2.4	3.2	3.4	4.3	4.3	2.6	2.9	1	2
230815	Man1c1	0.47	0.35	0.34	0.15	0.31	5e-05	5e-05	0.1	0.06
21343	Taf6	0.05	0.2	0.19	0.05	0.22	5e-05	5e-05	0.02	0.06
68758	Abhd11	0.21	0.26	0.44	0.13	0.08	0.29	0.29	0.37	0.57
69956	Ptcd3	0.74	0.98	0.32	0.21	0.37	0.17	0.45	0.11	0.21
80509	Med8	0.03	0.26	0.15	0.08	0.09	0.02	0.06	0.03	0.07
67993	Nudt12	5e-05	0.27	5e-05	0.02	0.0004	0.36	0.009	0.04	0.09
68703	Rere	0.04	5e-05	0.03	0.04	0.06	5e-05	5e-05	0.02	5e-05
243529	H1fx	29.6	27.3	15.3	19.7	27.8	19.6	16.1	5	11.3
72634	Tdrkh	0.57	0.64	0.76	0.89	1.5	0.18	0.6	0.23	0.73
67456	Ergic2	0.15	0.17	0.11	5e-05	0.13	5e-05	5e-05	0.06	5e-05
18391	Sigmar1	0.37	0.51	0.67	0.8	0.55	0.2	0.46	0.51	0.23
52163	Camk1	1	0.99	0.47	0.97	1.5	0.93	1.4	2.4	3
20539	Slc7a5	2.9	3.1	2.4	2.3	4.7	1.8	2	3.1	1.5
12340	Capza1	12.4	8.9	6.1	12.4	9.3	11.8	13.7	13.1	11.8
252972	Tpcn1	0.11	0.29	0.09	0.11	0.05	5e-05	5e-05	0.04	0.03
11991	Hnrnpd	70.5	69.1	95.5	72.8	97	73.5	72.6	64.9	55.1
67382	Brd3	2	3.7	2.4	1.6	3.1	2.4	1.4	1.1	0.52
72640	Mex3a	0.75	1	0.8	1	0.73	0.48	0.6	0.23	0.74
235469	Zfp280d	5e-05	0.02	0.01	0.02	0.03	5e-05	0.01	5e-05	5e-05
16341	Eif3e	10.2	12.6	9.8	8.8	9.7	9	9.6	5.4	6.5
74522	Morc2a	0.02	0.06	0.02	0.06	0.02	5e-05	5e-05	0.007	0.02
108058	Camk2d	0.6	0.39	0.67	0.97	1	0.8	1	4.5	2.4
75062	Sf3a3	8.7	8.5	8.7	7.3	8.8	7.8	7.7	4.7	5.1
108014	Srsf9	2.9	3.5	13.2	2.9	3.8	3	2.8	1.8	0.59
12995	Csnk2a1	10.2	12	11.9	12.9	10.5	10.8	10.4	8.5	10.5
67897	Rnmt	2.9	3.3	2.6	2.9	4.6	1.2	3.8	1.4	1.5
218343	Ttc37	0.03	0.04	0.03	0.005	0.04	5e-05	5e-05	0.01	0.01
27045	Nit1	0.11	0.09	0.07	0.05	0.06	0.26	0.1	0.1	0.1
114664	Hsd17b11	1.2	1.6	0.13	0.52	0.36	1.5	1.6	1.2	1.3
16882	Lig3	0.55	0.94	0.57	0.64	0.62	0.47	0.62	0.22	0.38
18074	Nid2	0.13	0.11	0.16	5e-05	0.15	0.58	0.19	2.9	1.3
237400	Mex3d	0.12	0.27	0.24	0.13	0.32	5e-05	0.09	5e-05	0.04
21761	Morf4l1	2.3	1.6	2	1.7	1.2	1.2	1.5	0.8	0.37
114886	Cygb	0.06	5e-05	5e-05	5e-05	5e-05	0.17	0.27	0.83	5e-05
52036	Ppp6r3	1.6	1.7	1.2	1.6	1.2	1.1	1.4	0.55	0.83
17885	Myh8	5e-05	0.16	5e-05	5e-05	5e-05	10.8	0.24	22	5e-05
78088	Sowahb	0.48	0.46	0.9	1.6	0.91	0.48	0.33	0.21	0.75
109676	Ank2	0.97	0.87	0.76	0.95	1.3	1.4	0.95	3.5	3.1
227522	Rpp38	0.19	0.39	0.61	0.32	0.34	0.02	0.07	0.04	5e-05
106821	Oard1	0.55	0.61	0.11	0.04	0.03	5e-05	0.78	5e-05	5e-05
110960	Tars	5.1	7.3	5.3	5.7	5.1	3.6	5.6	3.1	4.8
320808	Dcaf5	0.01	0.02	0.008	5e-05	0.02	0.008	5e-05	5e-05	5e-05
13859	Eps15l1	1	1.1	1	0.61	1.1	0.98	2	1.4	1.2
209318	Gps1	2.8	3	3.9	5.9	3.6	2.5	2.2	3.2	3.2
63959	Slc29a1	6.7	6.1	2.2	3.6	8.9	1.7	4.6	2.8	2.4
223722	Mcat	0.15	0.47	0.24	0.3	0.11	0.02	0.16	0.17	0.03
74108	Parn	0.23	0.06	0.12	0.15	0.21	5e-05	0.03	5e-05	0.07
94230	Cpsf1	0.46	0.77	0.5	0.38	0.58	0.31	0.57	0.33	0.29
22066	Trpc4	0.04	0.04	0.007	5e-05	0.003	5e-05	0.007	5e-05	5e-05
104418	Dgkz	0.39	0.21	0.09	0.48	0.26	0.04	0.14	5e-05	5e-05
76219	Arxes1	0.46	0.57	0.49	0.98	0.18	0.19	0.39	0.13	0.32
59008	Anapc5	0.15	0.18	0.26	0.23	0.16	0.07	0.11	0.22	0.08
18718	Pip4k2a	0.72	0.97	0.56	1.1	1.3	0.28	0.43	0.94	0.55
237711	Eml6	5e-05	0.03	0.0005	0.05	5e-05	5e-05	5e-05	5e-05	5e-05
64424	Polr1e	0.04	0.08	0.14	0.23	0.18	0.01	0.03	0.15	0.02
16881	Lig1	3.9	4.6	5.5	5.4	4.9	2.3	5.8	1.5	1.4
109075	Exosc4	0.72	0.95	1.5	1.4	1.1	0.46	0.44	0.71	1.2
15926	Idh1	19.6	14.4	16.9	16.8	18.7	17.5	28.7	19.4	24.4
67391	Fundc2	4	6.6	2.9	3.1	3.6	4.5	1.9	0.94	1.4
105298	Epdr1	1.4	1.5	1.2	0.68	0.74	1.1	2.6	4.3	1.5
264895	Acsf2	0.07	5e-05	0.11	0.05	5e-05	0.11	0.03	2.6	0.13
98828	Cdc123	0.06	0.21	0.14	0.37	0.16	0.17	0.03	0.08	0.04
54195	Gucy1b3	5e-05	5e-05	5e-05	5e-05	0.005	0.01	5e-05	0.01	0.07
53867	Col5a3	5e-05	5e-05	5e-05	5e-05	0.02	0.05	5e-05	0.18	0.04
65098	Zfand6	0.15	0.11	0.41	0.35	0.35	5e-05	0.12	5e-05	0.05
244668	Sipa1l2	0.03	0.07	0.03	0.05	0.04	5e-05	0.03	5e-05	0.009
27993	Imp4	0.2	0.32	0.6	0.36	0.22	0.08	5e-05	0.12	5e-05
229949	Ak5	5e-05	5e-05	5e-05	5e-05	0.02	5e-05	0.08	0.06	0.04
26919	Zfp346	0.05	0.03	0.04	5e-05	0.02	5e-05	5e-05	5e-05	0.02
11639	Ak4	5e-05	0.1	0.52	0.16	5e-05	0.37	0.29	1.2	0.48
270672	Map3k15	0.06	0.73	0.37	0.52	0.55	5e-05	0.43	5e-05	0.02
70579	Zc3h11a	0.48	0.4	0.56	0.42	0.29	0.4	0.26	0.18	0.34
226026	Smc5	0.11	0.18	0.009	0.15	0.19	5e-05	0.04	0.03	5e-05
22793	Zyx	0.38	0.49	0.87	0.76	0.64	0.67	1.1	1.4	0.71
381062	Ermard	5e-05	0.22	1.1	0.09	0.5	0.16	5e-05	5e-05	5e-05
27998	Exosc5	0.22	0.55	0.27	0.56	0.76	0.16	0.25	0.02	0.22
67826	Snap47	0.58	0.23	0.1	0.28	0.51	0.13	0.24	0.15	0.05
67014	Mina	0.25	0.53	0.2	0.31	0.22	0.06	0.28	0.02	0.13
76816	Sdccag8	5e-05	5e-05	0.04	5e-05	5e-05	0.11	5e-05	0.24	0.07
70432	Rufy2	5e-05	0.009	5e-05	5e-05	5e-05	5e-05	0.008	0.1	0.06
12661	Chl1	0.01	5e-05	5e-05	5e-05	5e-05	5e-05	0.009	0.75	0.73
384783	Irs2	5e-05	5e-05	5e-05	0.01	5e-05	5e-05	0.01	0.09	0.04
16319	Incenp	0.16	0.22	0.69	0.2	0.3	0.14	5e-05	5e-05	0.06
72124	Seh1l	0.77	1.6	0.91	0.84	0.77	0.38	0.88	0.79	0.43
12814	Col11a1	0.16	5e-05	0.22	0.007	0.03	1.1	0.02	0.59	1.3
76055	Mgea5	0.79	0.87	0.63	0.81	1.1	0.02	0.43	0.24	0.38
19221	Ptgfrn	5e-05	5e-05	0.08	0.04	0.11	0.03	0.17	0.47	0.2
235441	Usp3	0.02	0.04	0.02	0.06	1.1	5e-05	0.009	0.07	5e-05
19014	Med1	0.12	0.1	0.08	0.05	0.08	0.06	0.08	0.02	0.02
27176	Rpl7a	80.3	87.3	83.4	87.9	81.7	80	74.9	51.5	68.6
74330	Dnajc14	0.52	5e-05	0.26	0.52	1.2	5e-05	0.29	5e-05	5e-05
238024	Fn3krp	0.05	0.43	0.04	5e-05	0.03	5e-05	5e-05	5e-05	0.04
76884	Cyfip2	0.05	0.02	0.16	0.11	0.21	0.25	0.1	0.25	0.27
67862	2310033P09Rik	0.83	0.75	0.16	0.09	0.16	5e-05	0.06	5e-05	0.15
230674	Kdm4a	0.1	1.8	0.03	0.12	0.18	0.02	0.02	5e-05	0.04
69237	Gtpbp4	1.5	2.2	1.7	1.7	1.3	0.94	1.9	0.71	0.94
23806	Arih1	0.04	0.12	0.1	0.27	0.1	5e-05	0.02	0.08	5e-05
12259	C1qa	5e-05	5e-05	5e-05	5e-05	0.05	5e-05	0.04	0.53	0.51
104001	Rtn1	5.7	5.1	1.6	3.7	4.8	4.4	6	6.6	9.4
66978	Luc7l	1.1	1.6	2.1	1.3	1	0.67	0.14	1.3	0.48
74741	C2cd5	5e-05	0.08	0.02	0.06	0.05	5e-05	5e-05	0.03	5e-05
70361	Lman1	3.4	4.2	1.8	2.2	2.3	6.5	5.6	3	3
53378	Sdcbp	0.44	1.1	5e-05	0.12	5e-05	0.22	1.4	1.7	1.6
19076	Prim2	1.1	1.1	0.91	0.81	0.17	0.27	0.71	0.13	0.24
20361	Sema7a	3.3	4.9	2.7	3.6	4.7	2	2.6	1.8	4.1
59042	Cope	2.8	3.1	4	4.5	3.7	3.4	4.7	5.7	7.2
108100	Baiap2	0.23	0.12	0.59	0.01	0.03	5e-05	0.009	0.02	0.02
67898	Pef1	0.53	0.39	0.15	0.36	0.11	0.45	0.34	0.57	1.9
26446	Psmb3	14.7	16.4	11.4	13.6	10.8	14.5	19.1	13.9	17.3
13804	Endog	0.03	5e-05	5e-05	5e-05	5e-05	0.08	5	5e-05	0.07
18797	Plcb3	0.05	0.14	0.19	0.1	0.12	0.03	0.1	0.08	0.02
216197	Ckap4	12.6	12.2	9.5	14.9	18.4	16.3	14.4	24.1	16.6
52897	Rbfox3	0.1	5e-05	0.15	0.09	0.33	5e-05	0.09	5e-05	5e-05
69305	Dcps	6.5	5.5	5	5.9	4.9	6.5	6.9	5.4	8
19264	Ptprc	0.04	5e-05	0.007	0.12	5e-05	0.01	0.06	0.87	0.07
24001	Tiam2	5e-05	5e-05	5e-05	0.01	5e-05	0.14	0.007	0.07	5e-05
231712	Trafd1	0.03	0.03	0.01	0.02	0.02	0.02	0.07	0.06	0.03
207615	Wdr37	0.52	0.33	0.26	0.47	0.44	0.13	0.44	0.24	0.18
71924	Tube1	2.3	1.6	0.31	0.43	0.43	2.4	1.8	1.8	1
70767	Prpf3	0.93	0.79	1.6	1.5	1.5	1.1	1	0.51	0.75
66890	Lman2	0.17	0.17	0.05	0.35	0.24	0.12	0.67	1.4	0.68
67500	Ccar1	3	3.8	2.3	3	3.1	1.7	2.6	1.1	2.7
70952	Poteg	5e-05	5e-05	0.24	5e-05	5e-05	0.85	5e-05	0.64	0.46
66367	2310022A10Rik	0.01	0.02	0.17	2	0.13	5e-05	0.02	5e-05	0.08
380916	Lrch1	0.01	0.01	0.04	0.01	5e-05	5e-05	5e-05	0.01	5e-05
98660	Atp1a2	1.4	2	0.005	0.81	2.2	4.2	1.2	12.3	10.8
18720	Pip5k1a	0.06	0.01	0.007	0.008	0.66	5e-05	0.16	5e-05	5e-05
27407	Abcf2	2	2.8	2.8	2.2	1.8	1.8	2.4	1.3	1.2
665700	Hmcn2	0.008	5e-05	5e-05	5e-05	5e-05	0.04	0.02	5e-05	0.007
56417	Adar	0.03	0.05	0.15	0.06	0.04	5e-05	0.009	0.06	5e-05
16773	Lama2	5e-05	5e-05	0.008	5e-05	5e-05	0.007	0.02	0.09	5e-05
230904	Fbxo2	0.07	0.11	5e-05	0.25	0.26	0.92	0.08	2.6	2.8
219140	Spata13	0.04	5e-05	0.05	0.05	0.07	0.004	5e-05	5e-05	0.004
56085	Ubqln1	7.1	5.9	7	3.6	4.5	8.2	13.6	5.9	6.9
16978	Lrrfip1	0.08	5e-05	0.06	0.1	0.15	0.17	0.95	0.31	0.6
103468	Nup107	0.87	1.2	0.61	0.58	0.96	0.65	0.73	0.31	0.53
110651	Rps6ka3	2	2.2	1	1.8	1.8	1.3	1.6	1	1.2
193796	Kdm4b	0.06	0.04	0.04	0.03	0.05	0.009	5e-05	5e-05	0.04
66580	Esf1	0.08	0.18	0.19	0.17	0.12	0.009	0.03	0.04	5e-05
21452	Tcn2	5e-05	0.07	5e-05	5e-05	5e-05	5e-05	0.16	0.16	0.11
66420	Polr2e	3.9	3.1	3	3.4	2.7	1.6	3.7	1.7	2
72542	Pgam5	2.2	2.3	2.4	3.4	3.9	0.94	1.8	1.9	2.7
57258	Xpo4	0.08	0.16	0.13	0.04	0.15	0.06	0.1	0.03	0.04
433813	Pusl1	0.07	0.08	0.03	5e-05	0.06	5e-05	0.04	5e-05	5e-05
66222	Serpinb1a	5e-05	5e-05	5e-05	0.05	5e-05	0.14	0.04	0.92	5e-05
224902	Safb2	0.5	0.36	0.4	0.33	0.49	0.14	0.46	0.08	0.02
106143	Cggbp1	2.6	3	2.2	1.5	1.8	1.4	1.8	0.93	0.29
11352	Abl2	0.13	0.006	0.03	0.04	0.06	0.01	0.03	5e-05	5e-05
320271	Scai	0.05	0.07	0.02	0.05	0.11	5e-05	5e-05	0.02	0.03
667250	Gm12657	188	116	5e-05	372	444	125	5e-05	5e-05	5e-05
212442	Lactb2	0.007	0.1	0.09	0.31	5e-05	5e-05	5e-05	0.04	5e-05
15078	H3f3a	226	139	5e-05	446	533	150	5e-05	5e-05	5e-05
15081	H3f3b	226	139	5e-05	446	533	150	5e-05	5e-05	5e-05
625328	H3f3c	226	139	5e-05	446	533	150	5e-05	5e-05	5e-05
68617	Mtcl1	5e-05	5e-05	0.005	5e-05	5e-05	5e-05	0.02	0.01	0.004
78255	Ralgps2	0.22	0.22	0.27	0.1	0.04	0.06	0.06	5e-05	5e-05
385643	Kng2	5e-05	0.1	5e-05	5e-05	5e-05	5e-05	0.21	0.14	0.23
12421	Rb1cc1	5e-05	5e-05	5e-05	5e-05	0.02	5e-05	0.18	0.44	0.01
67220	Plekho1	5e-05	5e-05	5e-05	0.03	5e-05	0.43	5e-05	0.02	0.09
56324	Stam2	0.24	0.2	0.21	0.15	5e-05	5e-05	0.14	5e-05	5e-05
50933	Uchl3	7.6	5.9	7.3	9.6	7.8	9.9	13.9	8.1	8.5
107338	Gbf1	0.14	0.25	0.05	0.09	0.07	0.01	0.009	0.07	0.09
70349	Copb1	4.4	5.9	3.1	4.5	4.1	4.5	6	5	6.6
23827	Bpnt1	1.6	1.2	1.2	1.3	2	1.2	2.7	2.7	2.7
72014	Btbd17	5e-05	5e-05	0.27	5e-05	0.41	0.28	0.06	0.1	0.11
17126	Smad2	0.87	0.87	0.82	0.79	1.2	0.61	0.69	0.78	0.9
21406	Tcf12	0.31	0.45	0.33	0.17	0.14	0.22	0.19	0.14	0.11
30056	Timm9	2.1	2.4	1.8	2.8	2.4	1.5	2.2	0.7	0.34
56693	Crtap	5e-05	5e-05	0.09	5e-05	5e-05	5e-05	0.39	0.22	0.07
67899	Cmc1	5e-05	5e-05	0.8	5e-05	5e-05	1.4	2.6	5e-05	1.2
58992	F12	0.13	0.22	0.07	0.1	0.15	0.09	0.5	0.34	0.67
269180	Inpp4a	5e-05	5e-05	5e-05	5e-05	0.01	0.006	5e-05	0.05	0.34
234267	Gpm6a	3.1	1.6	0.35	3.5	3.2	3.1	5.4	4.1	4.7
71881	Apmap	0.99	0.74	0.47	0.54	0.93	0.87	0.97	1.8	0.84
69596	Ap5s1	0.13	0.09	0.06	5e-05	0.1	0.07	5e-05	5e-05	5e-05
234366	Gatad2a	0.64	1	1	0.51	0.93	0.59	0.35	0.71	0.61
13806	Eno1	171	176	143	188	162	247	175	179	294
433182	Eno1b	171	176	143	188	162	247	175	179	294
71853	Pdia6	39.1	34.8	32.2	40.1	25.8	51.4	40.7	32.7	52
100503670	Rpl5	59.2	77.9	67.1	82.3	72.7	69.5	66.3	42.8	43.6
73251	Setd7	0.6	0.1	0.02	0.08	0.04	5e-05	0.69	5e-05	5e-05
69639	Exosc8	0.88	1.2	0.59	0.5	0.65	0.26	1	0.23	0.16
74133	Smg8	0.02	0.04	0.03	0.04	0.09	0.01	0.03	0.02	0.03
238317	Elmsan1	0.05	0.05	0.06	0.009	0.02	5e-05	0.19	5e-05	5e-05
110809	Srsf1	54.1	51.1	65.4	59.4	62.5	56.7	47.9	40.5	54.5
13626	Eed	0.42	0.44	0.22	0.23	0.26	0.06	0.24	5e-05	5e-05
107829	Thoc5	0.58	0.66	0.3	0.18	0.23	0.17	0.32	0.07	0.2
72198	Skiv2l2	1.2	1.4	1.3	2.3	1.4	0.83	1.8	0.5	0.56
73068	Fut11	0.16	5e-05	0.03	0.01	0.06	5e-05	5e-05	0.03	5e-05
17930	Myom2	5e-05	5e-05	5e-05	0.1	5e-05	3.6	0.03	2.2	5e-05
57748	Jmy	0.06	0.09	0.007	0.02	0.06	5e-05	0.07	5e-05	0.003
21973	Top2a	4.6	6.4	8.9	5.7	3.5	6	3.8	2.2	2.7
229900	Gbp7	5e-05	5e-05	0.04	5e-05	5e-05	5e-05	0.02	0.21	0.14
67724	Pop1	0.18	1.7	2.5	0.4	0.53	0.07	0.33	5e-05	0.02
353190	Edc3	0.07	0.13	0.15	0.35	0.26	5e-05	5e-05	0.07	0.08
17762	Mapt	0.73	0.24	5e-05	5e-05	0.95	1.5	1.5	0.65	1.1
228850	Ralgapb	5e-05	0.03	0.007	0.003	0.01	5e-05	5e-05	5e-05	0.007
70294	Rnf126	0.07	0.07	0.21	5e-05	0.1	5e-05	0.08	5e-05	5e-05
75273	Pelp1	0.89	1.3	0.86	0.6	0.74	0.79	0.64	0.46	0.68
13688	Eif4ebp2	1.1	5e-05	1.7	1.6	2.2	5e-05	1.2	5e-05	5e-05
13486	Dr1	2.4	1.6	3.5	3.5	3.4	0.92	1.7	1.1	3.2
22117	Tst	9.4	13	11.6	9.5	7.3	4	3.4	5.3	12.4
12914	Crebbp	0.08	0.07	0.06	0.13	0.16	5e-05	5e-05	0.05	0.04
56041	Uso1	0.85	0.74	0.7	1.2	0.88	0.92	0.99	2	2.7
75695	Rilpl1	0.21	5e-05	5e-05	0.1	5e-05	0.11	0.01	0.05	0.16
56361	Pus1	0.29	0.26	0.45	0.34	0.42	0.22	0.18	0.11	0.38
224705	Vps52	0.03	0.07	0.15	0.1	0.09	0.02	5e-05	0.07	5e-05
74616	Scrn3	0.03	5e-05	5e-05	5e-05	5e-05	0.06	0.08	0.02	5e-05
67808	Tprgl	5e-05	5e-05	5e-05	0.26	5e-05	0.18	0.57	5e-05	0.73
19339	Rab3a	0.96	0.63	0.7	1.5	3.1	1.5	6.8	1.4	3.5
66201	Vta1	3.4	3.6	2.7	5.3	3.8	4	4.2	4.9	5.5
13990	Smarcad1	0.59	1	0.66	0.45	0.39	0.37	0.64	0.21	0.31
71701	Pnpt1	0.33	0.12	0.05	0.15	0.05	0.03	5e-05	5e-05	0.09
15586	Hyal1	5	0.1	14.9	33	13	5e-05	5e-05	5e-05	160
20616	Snap91	0.07	5e-05	5e-05	5e-05	5e-05	0.19	1.1	5e-05	0.03
227800	Rabgap1	0.53	0.84	0.42	0.68	0.73	0.4	0.58	0.36	0.55
381229	Cfap58	5e-05	5e-05	0.13	5e-05	5e-05	0.11	0.61	0.14	5e-05
72333	Palld	0.03	5e-05	0.05	0.02	0.02	0.02	0.1	0.83	0.08
54723	Tfip11	0.36	0.92	0.28	0.23	0.4	0.2	0.45	0.09	0.14
109900	Asl	0.19	0.07	0.03	5e-05	0.32	0.35	0.29	0.81	0.66
68479	Phf5a	2.4	0.7	2.7	3.9	5	1.8	1.3	1.3	0.8
11921	Atoh1	0.11	0.66	0.63	0.32	0.32	0.12	5e-05	0.19	5e-05
69893	Coa7	0.37	0.29	0.68	1	0.61	0.17	0.57	0.27	0.31
66939	Aagab	13.1	5e-05	0.06	0.1	0.06	5e-05	5e-05	0.14	5e-05
240283	Dmxl1	0.02	0.02	0.2	0.15	0.25	5e-05	0.004	0.22	5e-05
72148	Tdrp	5e-05	5e-05	0.24	5e-05	5e-05	0.43	5e-05	0.28	0.29
11676	Aldoc	3.1	2.8	3.3	2.1	7.5	11.7	2.2	23	40
73247	Mrgbp	0.28	5e-05	0.7	0.44	0.21	5e-05	0.31	5e-05	5e-05
15505	Hsph1	7	6.2	10.4	12.2	6.7	7	7.8	4	5
231803	Mepce	0.12	0.27	0.24	0.27	0.27	0.04	0.13	0.08	0.25
56079	Astn2	0.01	0.009	0.02	0.02	0.07	0.006	5e-05	0.02	5e-05
11941	Atp2b2	0.34	0.15	0.34	0.2	0.17	0.03	0.07	0.15	0.22
67673	Tceb2	10.6	10.3	13	14.2	12.3	10.4	12.3	9.1	9.5
19342	Rab4b	5e-05	5e-05	0.24	0.31	0.24	1.3	0.31	0.46	0.25
239985	Arid1b	0.23	0.45	0.2	0.19	0.36	0.02	0.16	0.15	0.16
14302	Frk	0.13	0.19	0.04	0.12	0.05	0.01	0.16	5e-05	5e-05
14376	Ganab	10.2	10.7	8.1	8.9	7.4	7.4	5.2	7	9.1
12041	Bckdk	0.09	0.2	0.1	5e-05	0.06	5e-05	0.09	5e-05	5e-05
76044	Ncapg2	0.24	0.36	0.17	0.24	0.14	0.05	0.34	0.06	0.04
225215	Rsl24d1	5e-05	0.46	0.98	0.75	0.69	5e-05	5e-05	5e-05	0.61
240028	Lnpep	0.08	0.04	0.03	0.02	5e-05	0.08	0.1	0.9	0.05
69163	Mrpl44	0.34	0.44	0.29	0.2	0.29	0.11	0.01	0.07	5e-05
99683	Sec24b	0.62	0.56	0.18	0.23	0.11	0.55	0.49	0.39	0.71
224630	Bnip1	1.1	1.4	1.7	0.39	0.99	0.36	0.85	0.53	0.71
19266	Ptprd	0.79	0.88	0.45	0.8	0.5	1.1	0.16	0.03	0.05
24131	Ldb3	5e-05	5e-05	5e-05	0.63	5e-05	5.8	0.14	4.3	5e-05
12558	Cdh2	1.5	1.3	0.88	1.3	1.2	1.5	1.2	1.7	1.6
13193	Dcx	7	4	2.6	5.3	9.6	3.9	4.3	2.5	2.8
78928	Pigt	0.03	0.7	0.008	5e-05	5e-05	0.36	0.06	0.08	0.1
230376	Haus6	0.05	0.07	0.1	0.11	0.11	0.02	0.09	5e-05	5e-05
56412	Noa1	0.04	0.05	0.01	0.04	0.05	5e-05	0.05	0.006	5e-05
20054	Rps15	25	24	22.6	19.2	14.4	23.5	13.5	10.8	13
83493	Sacm1l	0.41	0.53	0.54	0.41	0.57	0.74	0.42	1.5	1.5
22038	Plscr1	0.1	0.07	0.24	0.49	5e-05	5e-05	0.15	5e-05	5e-05
99237	Tm9sf4	5.7	7.2	3.2	0.38	3.8	0.35	0.27	4.6	0.46
75612	Gns	0.42	0.18	0.32	0.18	0.52	0.22	0.69	1.3	1
100978	Nfxl1	5e-05	0.01	0.04	0.04	0.08	5e-05	5e-05	0.03	5e-05
54624	Paf1	0.88	1.2	0.96	0.71	0.63	0.2	0.94	0.4	0.52
20658	Son	1.7	1.7	1.5	0.9	1.3	1.4	1.1	0.49	0.72
72416	Lrpprc	1.6	1.7	1.2	1	1.4	1.4	1.1	0.66	0.86
83410	Cstf2t	0.13	0.1	0.13	0.26	0.15	5e-05	5e-05	0.07	0.08
68810	Nexn	1.1	0.03	0.29	5e-05	5e-05	0.2	0.42	1.4	0.25
77045	Bcl7a	2.5	2.5	2.1	1.3	0.92	0.17	0.93	1.1	1.2
76561	Snx7	0.03	5e-05	0.05	0.07	0.03	5e-05	5e-05	0.04	5e-05
213435	Mylk3	0.36	0.11	0.06	0.12	5e-05	5e-05	0.12	5e-05	5e-05
12266	C3	9.5	12.8	7.1	11	12.9	8.9	20.1	16.3	25.8
11807	Apoa2	16.2	24.2	18.1	24.7	48.5	26.1	32.3	41.3	52.3
81702	Ankrd17	0.05	0.08	0.15	0.16	0.14	0.02	0.06	0.06	0.1
240255	Ythdc2	0.01	0.01	0.002	5e-05	0.009	5e-05	5e-05	0.006	5e-05
192196	Luc7l2	7.3	10.3	11.9	15.9	14.9	7.3	6.5	7.7	12.6
22324	Vav1	5e-05	5e-05	0.009	5e-05	5e-05	0.003	5e-05	0.15	0.04
68975	Med27	0.14	0.29	0.25	1.3	0.06	0.09	0.17	5e-05	5e-05
19055	Ppp3ca	4.4	3.7	1	2.6	2.9	3.4	4.9	3.9	5.1
65111	Dap3	0.58	1	0.52	0.52	0.46	0.24	0.54	0.08	0.4
320696	Ccdc158	5e-05	5e-05	5e-05	0.22	5e-05	5e-05	0.87	0.12	0.18
108154	Adamts6	5e-05	0.04	0.04	0.04	0.04	5e-05	5e-05	0.04	5e-05
14667	Gm2a	0.74	0.58	0.11	0.09	0.36	1.2	1.2	2.4	0.19
258511	Olfr523	5e-05	0.18	0.27	0.16	0.36	5e-05	5e-05	0.23	5e-05
170719	Oxr1	0.17	0.19	0.13	0.17	0.1	0.15	0.18	0.29	0.44
53602	Hpcal1	4.2	4.3	2	3	3.1	2.8	1.4	3.1	1.6
70381	Tecpr1	0.05	0.19	0.03	0.04	0.06	0.03	0.003	5e-05	0.02
54387	Mcm3ap	0.03	0.01	0.008	0.01	0.007	5e-05	0.006	0.009	5e-05
19270	Ptprg	0.04	0.23	0.07	0.02	0.14	5e-05	5e-05	0.02	0.08
19988	Rpl6	86.3	97.1	92	114	90	94	87.5	72.1	84.5
14583	Gfpt1	1.8	2.9	0.84	1.7	1.5	2.1	4.1	1.7	3.1
21429	Ubtf	7.2	8.3	5.9	5.1	8.2	7.3	5.4	2.6	2.6
117198	Ivns1abp	0.09	0.2	0.18	0.13	0.1	5e-05	0.13	5e-05	0.04
12818	Col14a1	0.77	0.14	0.68	0.79	0.88	0.39	2.1	9.7	2.4
66880	Rsrc1	0.35	0.42	0.47	0.65	0.34	5e-05	0.3	5e-05	0.16
77862	Thyn1	0.62	0.89	0.16	0.3	0.51	0.55	0.07	0.08	0.2
19360	Rad50	0.16	0.24	0.28	0.36	0.26	0.07	0.31	0.15	0.06
15211	Hexa	0.06	0.02	0.04	0.07	0.34	0.03	0.74	1.6	0.59
67760	Slc38a2	5e-05	5e-05	0.21	5e-05	5e-05	0.13	0.38	0.16	5e-05
70315	Hdac8	0.15	0.49	0.04	5e-05	0.1	5e-05	0.13	5e-05	5e-05
70699	Nup205	1.1	1.8	0.86	37.4	43.9	1.2	0.96	0.85	0.93
76303	Osbp	1.2	1.1	0.45	0.49	0.36	0.5	0.37	0.17	0.49
66492	Zmat2	0.38	0.44	0.85	1.1	0.51	5e-05	0.29	0.32	5e-05
23894	Gtf2h2	5e-05	0.02	0.03	0.008	0.03	5e-05	5e-05	0.02	5e-05
64075	Smoc1	0.07	0.39	0.04	0.19	0.18	5e-05	5e-05	0.11	0.05
72194	Fbxl20	5e-05	0.02	0.03	0.05	0.07	5e-05	5e-05	0.04	5e-05
328365	Zmiz1	0.06	0.06	0.09	0.03	0.16	5e-05	5e-05	0.02	0.08
385668	Lca5l	0.03	0.06	5e-05	0.04	0.01	5e-05	0.03	5e-05	5e-05
19299	Abcd3	1.1	2.1	1.1	1.2	1.5	1.5	1.4	2.9	2.6
52513	Ddx56	0.44	0.67	0.44	0.15	0.48	0.29	0.02	0.21	0.16
71147	Oxsm	0.25	0.39	0.17	0.5	0.4	0.23	0.22	0.28	0.16
27395	Mrpl15	0.2	0.21	0.2	0.38	0.37	5e-05	0.12	0.17	5e-05
72330	Klhl40	5e-05	5e-05	5e-05	5e-05	0.7	0.33	5e-05	1.1	0.57
329777	Pigk	0.09	0.12	0.03	0.11	0.1	0.12	0.1	0.21	0.13
109263	Rlf	5e-05	0.09	0.03	0.15	5e-05	5e-05	5e-05	5e-05	0.002
17215	Mcm3	19.2	21.9	18.6	24.8	24	16.4	24.1	9.6	9.1
13877	Erh	7	6.5	15.1	14.7	16.7	5.6	2.1	9.5	8.4
245038	Dclk3	0.02	0.03	0.02	0.01	5e-05	5e-05	5e-05	0.02	5e-05
192160	Casc3	0.11	0.05	0.19	0.04	0.13	0.02	0.13	0.02	0.03
18816	Serpinf2	4.3	4.4	1.1	2.7	3.8	2.9	9.8	4.3	7.3
17966	Nbr1	0.02	0.02	0.01	5e-05	0.009	5e-05	5e-05	0.01	0.0002
11522	Adh1	1.5	1.4	0.31	0.25	0.32	1.3	2.5	0.55	1.5
14166	Fgf11	5e-05	5e-05	5e-05	2.4	5e-05	1.3	5e-05	2	2.2
58520	0610007P14Rik	0.84	1.1	0.5	0.88	0.49	5e-05	0.22	0.64	5e-05
338368	Fam109b	1.4	1.3	1.1	1.3	1.5	0.12	0.39	0.81	1.3
229279	Hnrnpa3	178	232	195	180	229	210	177	151	136
67036	Mrpl45	0.06	0.21	0.67	0.3	0.57	5e-05	0.09	5e-05	0.26
110854	Ppp2r4	6.4	8	3.7	7.7	7.1	8.4	7.8	7.6	9.2
77053	Sun1	0.13	0.19	0.1	0.13	0.28	0.05	0.08	0.2	0.03
319875	Tmprss11b	0.48	0.39	1.4	2.2	0.48	5e-05	0.07	5e-05	1.8
17187	Max	0.35	0.44	0.15	0.38	0.08	5e-05	0.25	5e-05	0.07
229675	Rsbn1	5e-05	0.1	0.04	0.01	0.05	5e-05	5e-05	5e-05	0.04
67711	Nsmce1	5e-05	0.24	0.18	0.15	0.09	5e-05	0.18	5e-05	5e-05
227059	Slc39a10	0.3	0.24	0.29	0.15	0.26	0.12	0.16	5e-05	5e-05
11975	Atp6v0a1	0.63	0.43	0.39	0.33	0.71	0.53	0.53	0.88	1.4
15959	Ifit3	5e-05	5e-05	5e-05	0.007	0.02	5e-05	0.08	2.5	4.2
72145	Wdfy3	0.05	0.05	0.06	0.08	0.07	0.04	0.03	0.04	0.07
67863	Slc25a11	3	4.8	2.2	1.3	3.2	4	2.9	4.4	5.2
83703	Dbr1	0.16	0.13	0.04	0.13	0.12	5e-05	5e-05	0.07	0.06
229317	Eif2a	3.6	3.3	4.4	5.1	3.8	2.7	4.5	2.4	2.9
329165	Abi2	0.21	0.6	5e-05	5e-05	0.43	0.26	0.81	0.81	0.63
110611	Hdlbp	1.8	1.9	2	2.6	2.1	2.8	1.8	4.5	4
67812	Ubxn4	0.65	0.81	0.38	0.83	0.87	0.77	0.74	1.2	1.8
66082	Abhd6	0.04	0.14	5e-05	5e-05	0.18	0.17	0.02	0.37	0.45
20466	Sin3a	0.66	1.1	0.97	0.49	0.93	0.88	0.41	0.26	0.55
74107	Cep55	1	1.1	0.69	3.3	2.3	5e-05	5e-05	0.38	1.4
20692	Sparc	5e-05	5e-05	0.36	0.38	0.84	0.52	0.09	3.3	2.4
13171	Dbt	1.1	1.2	0.46	0.71	0.48	0.62	0.49	0.21	0.54
98193	Dcaf8	0.31	0.35	0.34	0.13	0.12	5e-05	0.04	0.07	0.03
72195	Supt7l	0.11	0.18	0.03	0.06	0.08	0.03	0.08	5e-05	5e-05
107817	Jmjd6	0.2	0.27	0.42	0.73	0.1	5e-05	0.08	5e-05	0.32
20401	Sh3bp1	0.31	0.46	0.04	0.31	0.57	0.4	0.63	0.53	1
18514	Pbx1	1.3	1.4	1.3	1.2	2.7	1.3	0.1	0.25	1.2
210789	Tbc1d4	0.09	0.08	0.98	0.15	0.13	0.05	0.03	5e-05	0.03
219158	Ccar2	5.6	5.5	4.2	4.3	6.2	5	4.7	3.4	3.9
22764	Zfx	0.02	5e-05	0.06	0.04	0.01	5e-05	5e-05	0.03	5e-05
78753	Lipm	0.28	0.34	5e-05	0.23	0.23	5e-05	0.34	5e-05	5e-05
18974	Pole2	0.09	0.11	0.29	0.02	5e-05	5e-05	0.1	5e-05	5e-05
20528	Slc2a4	5e-05	0.34	5e-05	5e-05	5e-05	0.23	5e-05	0.11	0.6
320790	Chd7	0.11	0.18	0.09	0.14	0.17	0.06	0.18	0.04	0.06
208727	Hdac4	0.01	5e-05	0.11	0.004	0.3	5e-05	0.03	5e-05	5e-05
67211	Armc10	1.9	1.7	1.7	2.4	3.1	0.36	0.57	1.6	2.2
12912	Creb1	8.5	5.2	8	5	9.1	5	7.7	4.2	3.6
22210	Ube2b	0.07	5e-05	0.7	0.88	0.74	5e-05	5e-05	0.52	5e-05
208908	Ccdc62	1.3	4.7	0.48	1.1	0.67	0.43	1.4	0.39	0.15
320024	Nceh1	0.21	0.3	0.05	5e-05	0.15	0.35	0.34	0.78	1
234594	Cnot1	1.2	1.3	1.1	1.4	1.1	0.74	1.3	0.45	0.91
66505	Zmynd11	0.36	0.34	0.48	0.37	0.55	0.3	0.29	0.03	0.17
52174	Tmem222	0.14	0.35	0.07	0.14	5e-05	5e-05	0.19	5e-05	5e-05
192176	Flna	15.5	17.9	22.5	16.4	18.1	25.5	17.5	38	21.6
26416	Mapk14	0.46	0.45	1.2	1.6	0.65	0.49	0.52	0.36	0.57
21899	Tlr6	5e-05	0.07	5e-05	5e-05	5e-05	0.03	0.03	5e-05	0.24
17882	Myh2	0.04	0.2	0.11	0.48	0.03	29.5	0.04	44.7	0.77
230917	Tmem201	0.02	0.12	5e-05	5e-05	0.03	0.14	0.02	0.03	0.13
21917	Tmpo	73	79.1	78.5	65.5	96.9	85.9	63.7	46	44.7
13433	Dnmt1	4.2	5.1	4.6	4	4.3	3.5	4.5	2	3.3
74737	Pcf11	0.05	0.05	0.1	0.16	0.19	5e-05	0.03	0.02	0.02
51786	Cpsf2	0.23	0.61	0.32	0.5	0.53	0.11	0.29	0.27	0.38
20220	Sap18	1.3	2.2	3.2	2.8	5.2	1.6	1.3	2.1	2.1
100041953	Gm10094	1.3	2.2	3.2	2.8	5.2	1.6	1.3	2.1	2.1
78428	Wibg	3.7	2.6	4.6	2.8	3.1	1.7	4.1	0.51	1.2
225283	Rprd1a	1.5	0.93	0.83	1.4	2	0.67	1.1	0.68	1.2
12029	Bcl6b	0.74	5e-05	0.43	5e-05	0.67	0.92	1.6	0.94	0.37
223254	Farp1	0.58	0.56	0.55	0.28	0.63	0.59	0.51	0.87	1.2
107815	Scml2	0.03	0.04	0.23	0.22	0.15	0.03	0.007	5e-05	0.05
74691	Tdrd9	5e-05	0.25	0.35	5e-05	0.32	5e-05	0.006	5e-05	5e-05
72590	Ppme1	1.7	1.6	0.76	0.74	1.9	1.9	2.5	1.4	1.7
21822	Tgtp1	5e-05	5e-05	5e-05	5e-05	0.21	5e-05	0.08	0.11	0.27
208263	Tor1aip1	0.64	0.53	0.75	0.49	0.97	0.64	0.79	3.2	2.5
97165	Hmgb2	170	165	233	171	236	160	202	78.1	109
75553	Zc3h14	0.4	0.59	0.7	0.31	0.37	0.24	0.12	0.15	0.61
53325	Banp	5e-05	0.009	0.04	0.05	0.02	5e-05	5e-05	5e-05	0.03
105727	Slc38a1	5e-05	0.05	5e-05	5e-05	5e-05	0.03	0.07	0.02	5e-05
21411	Tcf20	0.01	0.01	0.003	0.007	5e-05	5e-05	5e-05	0.008	5e-05
53323	Ube2k	2.2	1.9	0.57	0.17	1.2	3	4.5	0.9	2
68263	Pdhb	8.7	10.6	8.1	8	9.1	9.1	10.2	9.8	13.8
14718	Got1	2.7	2.4	3.1	3	2.6	3.4	2.5	4	3.7
17256	Mea1	5e-05	5e-05	0.25	0.25	0.16	0.36	0.42	0.3	0.15
50908	C1s1	5e-05	5e-05	0.04	5e-05	5e-05	5e-05	0.008	0.09	0.06
70829	Ccdc93	0.07	0.05	0.01	0.02	0.08	0.02	0.23	0.51	0.15
22138	Ttn	0.04	0.18	0.05	0.01	0.11	1.9	0.11	2.2	0.04
66073	Txndc12	11.3	7.7	6.5	4.9	8.5	9.6	13.8	8.9	8.4
12282	Hyou1	6.2	7.2	4.7	7.2	5.8	8.3	6.3	7	12.5
16552	Kif12	4.2	2.6	2.7	2.4	3.2	0.59	4.6	5e-05	5e-05
21755	Prss39	5e-05	5e-05	5e-05	5e-05	0.7	0.3	0.3	5e-05	0.53
328977	Zfp532	0.01	0.02	0.07	0.02	0.09	5e-05	0.05	5e-05	0.009
59126	Nek6	5e-05	5e-05	0.08	5e-05	5e-05	0.07	5e-05	0.04	0.04
11564	Adsl	7.4	6.2	5.9	6.5	6.4	5.9	6.5	4.2	5.3
18570	Pdcd6	2.1	1.6	1.5	1.1	1.6	1.5	1.8	3.4	2.6
67444	Ilkap	0.99	0.87	1	1.4	1	0.73	1.2	0.29	0.45
97487	Cmtm4	0.8	0.57	0.26	0.97	0.88	5e-05	0.59	5e-05	0.28
16898	Rps2	46.2	59.4	57.5	63.6	57.2	54.2	55.8	38.6	43.5
16835	Ldlr	0.03	0.03	0.14	0.06	0.02	5e-05	0.05	0.02	5e-05
51886	Fubp1	31	26	35.5	30.7	29.3	28	30.7	15.8	19
99696	Ankrd50	0.36	0.33	0.41	0.41	0.6	5e-05	0.33	5e-05	0.23
12540	Cdc42	9.1	9.2	4.4	6.1	6.9	8.6	10.8	10.6	6.9
14107	Fat1	5e-05	5e-05	0.01	5e-05	5e-05	0.15	0.02	0.002	5e-05
108903	Tbcd	0.34	0.48	0.41	0.32	0.34	0.1	0.38	0.2	0.29
23999	Twf2	1.3	0.98	0.66	1.2	0.8	0.91	1.3	2.3	1.4
66481	Rps21	42.9	38	73.8	61.6	51	41.5	44.9	40.1	42.1
66233	Dmap1	0.31	0.22	0.14	0.45	0.42	0.16	0.34	0.12	0.06
67179	Ccdc25	0.27	0.38	0.47	0.74	0.3	0.46	0.26	0.15	0.22
66840	Wdr45b	0.05	0.09	0.08	0.06	5e-05	5e-05	0.1	5e-05	5e-05
207214	Larp4	0.5	0.25	0.89	0.62	0.22	0.1	0.41	0.33	0.18
12177	Bnip3l	0.02	0.02	0.11	5e-05	0.16	5e-05	5e-05	5e-05	0.07
224619	Traf7	1	0.81	0.37	0.5	0.89	5e-05	0.25	5e-05	0.8
72432	Spink5	0.04	0.04	0.08	0.11	5e-05	5e-05	5e-05	5e-05	0.09
100763	Ube3c	0.26	0.47	0.24	0.13	0.17	0.03	0.14	0.09	0.25
68235	Mturn	0.56	0.48	0.1	0.16	0.63	5e-05	0.23	5e-05	0.21
72068	Cnot2	0.96	0.82	0.46	0.48	0.46	0.16	0.64	0.31	0.44
24018	Rngtt	0.11	0.18	0.19	0.11	0.07	0.08	0.38	0.4	0.37
66790	Grtp1	0.07	0.38	0.02	0.04	0.05	0.04	5e-05	5e-05	0.06
108124	Napa	2.8	3.3	1.4	3.9	2.9	2.1	1.7	2.4	1.8
21985	Tpd52	1	0.84	5e-05	0.54	0.45	3	3.4	3	1.8
116838	Rims2	5e-05	0.09	5e-05	5e-05	5e-05	5e-05	0.15	0.02	0.05
98878	Ehd4	0.35	0.56	5e-05	0.09	0.33	0.38	0.59	3.8	1.4
11306	Abcb7	0.29	0.29	0.17	0.24	0.28	0.04	0.25	0.07	0.21
56325	Abcb9	2.9	2.6	0.79	1.4	1.2	2.8	8.3	2	2
22321	Vars	9.2	10.2	13.3	13.6	11.7	9	10.4	6.3	11.1
99571	Fgg	42.3	38	11.1	20.7	23.1	36.2	113	30.5	34
170707	Usp48	0.15	0.18	0.12	0.11	0.23	0.11	0.14	0.05	0.12
22171	Tyms	2.2	2.2	2.9	2.5	1.3	1.6	2.5	0.88	0.89
100169	Phactr4	0.03	0.1	0.14	0.07	0.09	0.05	0.07	5e-05	5e-05
228961	Npepl1	5e-05	5e-05	0.06	5e-05	5e-05	5e-05	0.006	0.52	0.11
399591	Tmsb15l	3.4	5e-05	3.7	3.5	5e-05	5	7	2.6	4.6
68833	Pdcl3	0.47	0.44	0.86	1.4	0.73	0.39	0.52	0.21	0.71
20598	Smpd2	1.2	1.6	0.49	0.41	0.59	0.06	5e-05	0.23	0.17
67228	Dph7	0.07	1.3	0.008	0.03	5e-05	5e-05	5e-05	5e-05	0.08
76952	Nt5c2	0.6	0.77	0.29	0.39	0.39	0.35	0.4	0.1	0.29
102122	Fam192a	1.2	1.2	2	1.2	1.1	0.54	2	0.08	0.21
54451	Cpsf3	1.4	1.6	1.2	0.82	1.1	0.92	1.3	0.7	0.8
27223	Trp53bp1	0.9	1	0.37	0.58	0.97	0.69	0.66	0.19	0.22
19414	Rasa3	0.11	0.1	0.02	0.02	0.08	0.07	0.05	0.37	0.35
76464	Casc5	0.01	0.01	0.01	5e-05	0.003	5e-05	0.01	5e-05	5e-05
22145	Tuba4a	5e-05	5e-05	309	476	529	549	833	459	575
226432	Ipo9	0.92	2	1.2	1.3	1.2	0.83	1.2	0.65	1.2
21426	Tfec	1.1	1.3	0.3	2.3	0.97	0.69	0.76	5e-05	5e-05
16825	Ldb1	0.05	0.06	5e-05	0.07	0.07	5e-05	0.1	5e-05	5e-05
244654	Mtss1l	0.14	0.02	5e-05	5e-05	0.02	0.04	0.03	0.04	0.1
14199	Fhl1	5e-05	0.18	0.5	1.1	0.85	3.5	0.44	8.7	1.8
56278	Gkap1	0.12	0.13	0.07	0.29	0.03	5e-05	5e-05	0.12	0.05
16796	Lasp1	5	4.7	3.8	4.3	9.9	5	6.2	14.9	11.4
68195	Rnaset2b	0.14	5e-05	0.06	0.06	0.07	0.18	0.27	0.51	0.1
100037283	Rnaset2a	0.14	5e-05	0.06	0.06	0.07	0.18	0.27	0.51	0.1
72107	Dscc1	0.04	0.08	0.06	0.12	0.02	5e-05	0.09	5e-05	0.02
69654	Dctn2	14.1	9.3	13.8	14.8	17.9	9	10.9	12.2	12.8
71770	Ap2b1	8	7.8	3.1	5.9	5.1	8.2	8.9	6.9	6.8
432940	Otulin	5e-05	0.11	0.13	0.09	0.16	5e-05	5e-05	5e-05	0.21
320405	Cadps2	5e-05	0.03	0.004	0.04	0.16	5e-05	5e-05	0.04	5e-05
28077	Med10	0.3	0.12	0.22	0.13	0.19	5e-05	0.25	5e-05	0.08
227197	Ndufs1	5.1	5.8	3.9	4.1	6.1	3.2	3.1	5.6	3.7
108707	Fam207a	0.71	0.69	0.72	0.7	0.53	0.13	5e-05	0.13	0.13
225432	Rbm27	0.2	0.33	0.3	0.55	0.32	0.06	0.14	0.04	5e-05
15388	Hnrnpl	81	97.5	77.5	80.1	101	89.7	73.4	53	72.8
228787	Xkr7	0.57	0.4	0.1	0.63	1.1	0.12	0.04	5e-05	0.15
217864	Rcor1	1.6	1.6	1.1	1.3	0.84	0.77	1.6	0.42	0.23
218518	Marveld2	2.4	0.48	1.5	2.7	2.1	2.4	8	2.2	2.3
238988	Erc2	5e-05	6.9	5e-05	5e-05	5e-05	0.78	5.7	5e-05	1.9
216821	Tmem11	1.8	2.1	0.27	0.19	0.35	1.3	1.6	1.2	1.4
224897	Dpp9	0.23	0.02	0.14	0.11	0.05	5e-05	5e-05	0.05	0.09
14265	Fmr1	2.8	3.5	2.4	2.5	2.4	1.8	2.9	1.4	0.53
13601	Ecm1	0.98	0.16	5e-05	0.01	0.98	0.34	1.8	1.5	0.68
30957	Mapk8ip3	0.19	0.25	0.03	0.13	0.15	0.13	0.48	0.17	0.49
98685	Trmt1l	0.16	0.14	0.08	0.2	0.02	0.06	0.1	5e-05	5e-05
12122	Bid	2.5	0.98	1.3	2.4	2.4	1.6	1.5	0.84	0.32
74438	Clvs1	0.14	0.03	5e-05	0.06	0.24	5e-05	0.15	5e-05	5e-05
433864	Nom1	0.07	0.11	0.23	0.14	0.2	0.05	5e-05	0.03	0.03
24136	Zeb2	0.16	0.12	0.22	0.16	0.29	0.06	0.05	0.21	0.14
77305	Wdr82	1.7	1.5	0.76	0.75	0.98	1	0.92	0.67	0.56
17827	Mtx1	0.33	0.33	0.14	0.19	0.22	0.27	0.27	0.37	0.95
67290	3110040N11Rik	0.31	0.17	0.26	0.12	5e-05	0.32	0.5	0.18	13
20932	Surf4	0.68	0.35	0.06	5e-05	0.12	1.6	0.75	0.42	0.48
21780	Tfam	1.4	1.6	1	1.1	1.3	0.95	1.3	0.46	0.91
233813	Vwa3a	0.35	0.2	0.09	0.4	0.28	0.1	0.16	0.18	0.16
13644	Efs	0.09	0.01	0.86	5e-05	0.03	5e-05	0.1	5e-05	5e-05
56462	Mtch1	0.38	0.37	0.25	0.4	0.19	0.41	0.34	0.35	0.56
67212	Mrpl55	0.75	1.2	0.57	0.09	0.71	0.49	5e-05	0.35	5e-05
16648	Kpna3	5.7	5.2	4.6	6.4	4.9	3.6	6.5	2.7	3.2
20744	Strbp	0.4	0.38	0.18	0.39	0.5	0.07	0.1	0.07	5e-05
19246	Ptpn1	0.67	1.1	0.72	0.71	0.66	0.79	0.91	1.1	0.86
18148	Npm1	88.1	75.5	179	174	160	104	102	83.2	84.5
66070	Cwc15	2	1.8	5.8	3.8	4.6	1.6	1.9	2	3.3
329324	Syt14	5e-05	0.09	5e-05	5e-05	5e-05	5e-05	1.1	0.06	0.009
13860	Eps8	5e-05	5e-05	0.14	5e-05	5e-05	0.11	5e-05	0.04	0.04
13850	Ephx2	5e-05	5e-05	5e-05	5e-05	0.57	0.7	5e-05	0.1	0.13
12767	Cxcr4	0.25	0.52	0.15	0.56	0.16	0.1	0.12	5e-05	0.02
72960	Top1mt	0.65	0.47	0.99	1.7	1.1	1.1	0.19	0.56	0.33
56070	Tcerg1	3.1	3.8	3.5	2.8	3.3	1.5	4.3	1.1	2
231329	Polr2b	2.2	2.1	1.7	1.5	2	1.8	1.9	1.2	1.1
16650	Kpna6	1.6	1.8	1	0.81	0.73	0.87	0.83	0.87	0.72
20930	Surf1	0.03	0.12	5e-05	0.03	0.14	5e-05	5e-05	5e-05	0.11
26384	Gnpda1	0.56	0.25	5e-05	0.17	0.2	0.24	1.1	1	2.2
54632	Ftsj1	0.16	0.15	0.11	0.18	0.14	5e-05	0.19	0.08	5e-05
233552	Gdpd5	0.12	0.13	0.18	0.14	0.17	0.13	5e-05	0.12	5e-05
71970	Zbed5	0.27	0.34	5e-05	5e-05	0.52	0.97	2.2	0.22	0.07
14645	Glul	2	3.1	1	2.2	3.1	4.8	1.5	7.1	23.8
74392	Specc1l	0.01	0.06	0.08	0.009	5e-05	5e-05	0.04	5e-05	5e-05
102693	Phldb1	0.04	0.06	0.1	0.35	0.43	0.26	0.16	0.34	0.58
12236	Bub1b	0.02	0.03	0.09	0.08	5e-05	5e-05	0.08	5e-05	5e-05
68014	Zwilch	0.11	0.22	0.17	0.14	0.02	0.02	0.04	0.03	5e-05
75296	Fgfr1op	0.17	0.009	0.19	0.19	0.25	0.01	0.03	5e-05	0.07
56382	Rab9	0.84	0.74	0.34	0.8	0.89	0.46	0.29	0.81	0.15
270058	Map1s	0.17	0.14	0.28	0.3	0.48	0.22	0.37	0.65	0.53
213109	Phf3	0.04	0.007	0.04	0.11	0.05	0.004	0.03	0.007	0.03
12580	Cdkn2c	0.26	0.72	0.77	1	1	0.19	0.39	0.54	0.59
66868	Mfsd1	5e-05	0.05	0.03	0.05	0.05	5e-05	5e-05	0.08	5e-05
233977	Ppfia1	0.35	0.49	0.27	0.71	0.41	0.13	0.45	0.34	0.21
230737	Gnl2	0.12	0.23	0.19	0.04	0.08	0.13	0.3	0.2	0.18
56702	Hist1h1b	523	1004	531	967	903	765	287	699	245
54196	Pabpn1	13	12.8	16.8	13.7	16.7	13.7	14.1	10	12.4
56389	Stx5a	0.58	0.59	0.46	0.43	0.63	0.06	0.12	0.48	0.52
100042503	Gm3873	7.2	6	3.8	9.6	10.8	0.92	1.6	4.7	8.9
18798	Plcb4	5e-05	5e-05	0.04	5e-05	5e-05	5e-05	0.18	0.01	0.01
19038	Ppic	6.4	8.6	9.6	9.5	8.9	9.1	8.3	14.8	12.9
238276	Akap5	0.1	0.06	0.11	0.07	0.15	5e-05	0.16	5e-05	0.04
98366	Smap1	0.83	0.91	1.2	1.9	2	1.2	1.8	2.1	2.7
19231	Ptma	230	234	547	444	784	261	339	203	274
22343	Lin7c	2.3	2	1.6	3.6	2.5	2.8	2.3	4.2	8.5
28064	Yipf3	0.31	0.19	0.2	0.13	0.21	5e-05	0.15	0.21	5e-05
664783	Dux	4.2	5e-05	2.9	0.12	0.2	0.49	1.4	15.4	15.1
66366	Ergic3	0.29	0.28	0.08	0.1	0.38	0.16	5e-05	0.18	5e-05
66921	Prpf38b	0.4	0.14	0.52	0.64	0.41	0.12	0.35	0.17	0.31
72656	Ints8	0.04	0.03	0.07	0.03	0.03	0.01	5e-05	0.02	0.01
52589	Ncald	3.1	3.8	5e-05	5e-05	2.6	4.5	2.6	3.8	2.8
320940	Atp11c	0.008	0.09	0.005	5e-05	0.04	0.03	5e-05	5e-05	5e-05
18103	Nme2	173	167	130	149	140	234	189	139	183
218543	Srek1	1.2	1.4	0.95	0.72	1.3	0.13	1.2	0.5	0.64
29819	Stau2	0.09	0.21	0.01	0.08	0.06	5e-05	0.04	5e-05	0.08
22122	Tsta3	2.2	2.8	1.9	2.7	2.8	1.5	2.4	1.7	2.4
12183	Bpgm	0.31	0.43	0.48	0.1	0.17	0.09	0.28	0.13	0.13
227638	Qsox2	0.009	0.03	0.24	0.24	0.009	0.009	0.01	0.03	0.008
26397	Map2k3	0.03	0.04	0.05	0.02	0.03	0.04	0.005	5e-05	0.005
68796	Tmem214	0.07	0.08	0.13	0.08	0.12	0.1	0.09	0.26	0.23
116873	Stim2	0.008	5e-05	0.01	0.04	0.03	5e-05	5e-05	5e-05	0.03
56459	Sae1	9.5	10.1	6.9	12.1	11.2	6	11.2	6.4	7.4
53626	Insm1	0.03	0.08	0.07	0.1	0.2	5e-05	5e-05	0.11	0.05
13424	Dync1h1	7.8	9.1	5.9	7.4	9.1	9	11	7.6	9.4
54483	Mefv	0.09	0.01	5e-05	5e-05	0.09	5e-05	5e-05	5e-05	0.003
18567	Pdcd2	0.12	0.1	0.17	0.06	0.09	5e-05	0.1	0.09	5e-05
67418	Ppil4	0.44	0.45	1.2	1	1.5	0.43	0.57	0.51	0.64
11947	Atp5b	146	164	117	142	130	195	161	150	139
22318	Vamp2	3.9	3.1	5.6	6.2	7.5	6.8	4.8	11.1	7.2
83946	Phip	0.18	0.16	0.21	0.19	0.21	5e-05	0.11	0.02	0.05
56380	Arid3b	0.2	0.4	5e-05	0.26	0.22	5e-05	5e-05	0.62	5e-05
407788	BC051142	0.91	0.54	2	3.1	0.85	5e-05	0.1	0.02	2.5
78833	Gins3	0.66	0.68	0.76	0.46	0.9	0.15	1.4	0.08	0.15
74022	Glyr1	3.4	2.7	2.1	1.8	3	3	1.5	1.8	1.4
212647	Aldh4a1	0.43	0.28	0.69	0.79	0.3	0.35	0.07	0.29	0.36
52477	Angel2	0.12	0.13	0.44	0.01	0.05	5e-05	0.14	5e-05	0.04
18046	Nfyc	1.5	1.1	0.55	0.93	1.4	0.66	1.4	5e-05	5e-05
68205	Urm1	0.48	0.6	0.42	0.73	1.8	5e-05	0.73	0.58	5e-05
11674	Aldoa	89.4	113	128	131	119	177	99.9	160	154
72125	Amer2	0.3	5e-05	0.09	0.09	0.31	5e-05	0.01	5e-05	0.03
107435	Hat1	5.2	6.1	3.6	2.6	2.1	2.7	3.5	0.62	1.9
319801	Tigar	2.3	1.4	0.07	0.83	0.7	2.7	4.8	0.77	1.5
67471	Gpatch1	5e-05	5e-05	0.05	0.05	5e-05	5e-05	5e-05	5e-05	5e-05
666173	Vps13b	0.02	5e-05	0.02	5e-05	5e-05	5e-05	5e-05	5e-05	5e-05
13828	Epb42	5e-05	0.02	0.02	5e-05	5e-05	5e-05	5e-05	5e-05	5e-05
66844	Ormdl2	5e-05	5e-05	5e-05	0.27	0.27	5e-05	5e-05	5e-05	5e-05
67016	Tbc1d2b	5e-05	5e-05	0.02	0.02	5e-05	5e-05	5e-05	5e-05	5e-05
216578	Papolg	5e-05	5e-05	5e-05	0.02	0.02	5e-05	5e-05	5e-05	5e-05
13385	Dlg4	0.02	5e-05	5e-05	0.02	5e-05	5e-05	5e-05	5e-05	5e-05
77929	Yipf6	5e-05	5e-05	0.02	5e-05	0.02	5e-05	5e-05	5e-05	5e-05
12166	Bmpr1a	5e-05	5e-05	5e-05	0.02	0.02	5e-05	5e-05	5e-05	5e-05
381634	Gm1043	5e-05	0.02	5e-05	5e-05	0.02	5e-05	5e-05	5e-05	5e-05
78618	Acap2	5e-05	5e-05	5e-05	0.02	0.02	5e-05	5e-05	5e-05	5e-05
239759	Liph	0.29	5e-05	5e-05	0.29	5e-05	5e-05	5e-05	5e-05	5e-05
170460	Stard5	5e-05	5e-05	0.02	0.02	5e-05	5e-05	5e-05	5e-05	5e-05
319817	Rc3h2	5e-05	0.01	5e-05	0.01	5e-05	5e-05	5e-05	5e-05	5e-05
620779	Gm12695	5e-05	5e-05	0.01	0.01	5e-05	5e-05	5e-05	5e-05	5e-05
71458	Bcor	5e-05	5e-05	0.003	5e-05	0.003	5e-05	5e-05	5e-05	5e-05
67553	Gstcd	5e-05	5e-05	0.03	5e-05	0.03	5e-05	5e-05	5e-05	5e-05
112403	Dxo	5e-05	5e-05	0.04	5e-05	0.04	5e-05	5e-05	5e-05	5e-05
209003	Rbmx2	5e-05	5e-05	5e-05	0.21	0.21	5e-05	5e-05	5e-05	5e-05
76804	Kdm4c	5e-05	5e-05	0.01	5e-05	0.01	5e-05	5e-05	5e-05	5e-05
230157	Tmeff1	5e-05	5e-05	5e-05	0.43	0.44	5e-05	5e-05	5e-05	5e-05
56807	Scamp5	0.43	5e-05	5e-05	5e-05	0.45	5e-05	5e-05	5e-05	5e-05
76041	Ccdc125	5e-05	0.16	5e-05	0.17	5e-05	5e-05	5e-05	5e-05	5e-05
320502	Lmod3	5e-05	5e-05	5e-05	0.15	0.14	5e-05	5e-05	5e-05	5e-05
69367	Glrx2	0.74	5e-05	0.82	5e-05	5e-05	5e-05	5e-05	5e-05	5e-05
67922	Fam32a	5e-05	5e-05	0.62	5e-05	0.56	5e-05	5e-05	5e-05	5e-05
69860	Eif1ad	5e-05	5e-05	0.2	0.22	5e-05	5e-05	5e-05	5e-05	5e-05
214575	Tdrd5	5e-05	5e-05	0.09	5e-05	0.1	5e-05	5e-05	5e-05	5e-05
320722	A330050F15Rik	5e-05	5e-05	0.69	0.79	5e-05	5e-05	5e-05	5e-05	5e-05
213556	Plekhh2	5e-05	5e-05	5e-05	0.16	0.18	5e-05	5e-05	5e-05	5e-05
212772	Arl14ep	5e-05	5e-05	0.09	0.08	5e-05	5e-05	5e-05	5e-05	5e-05
60425	Doc2g	5e-05	5e-05	5e-05	1.3	1.1	5e-05	5e-05	5e-05	5e-05
69942	Rnf113a1	5e-05	5e-05	0.14	5e-05	0.12	5e-05	5e-05	5e-05	5e-05
56419	Diap3	5e-05	5e-05	0.009	0.01	5e-05	5e-05	5e-05	5e-05	5e-05
264134	Ttc26	5e-05	5e-05	5e-05	0.01	0.009	5e-05	5e-05	5e-05	5e-05
67171	Dram2	28.7	5e-05	5e-05	5e-05	37.9	5e-05	5e-05	5e-05	5e-05
74354	Lrguk	5e-05	5e-05	0.16	5e-05	0.19	5e-05	5e-05	5e-05	5e-05
230234	Fam206a	5e-05	0.07	0.06	5e-05	5e-05	5e-05	5e-05	5e-05	5e-05
225207	Zfp521	0.009	5e-05	5e-05	5e-05	0.008	5e-05	5e-05	5e-05	5e-05
381038	Parl	0.06	0.05	5e-05	5e-05	5e-05	5e-05	5e-05	5e-05	5e-05
319178	Hist1h2bb	5e-05	971	1566	5e-05	5e-05	5e-05	5e-05	5e-05	5e-05
56323	Dnajb5	0.27	5e-05	0.35	5e-05	5e-05	5e-05	5e-05	5e-05	5e-05
12040	Bckdhb	5e-05	5e-05	5e-05	0.08	0.1	5e-05	5e-05	5e-05	5e-05
194231	Cnksr1	0.1	0.08	5e-05	5e-05	5e-05	5e-05	5e-05	5e-05	5e-05
22758	Zscan12	5e-05	5e-05	0.007	0.006	5e-05	5e-05	5e-05	5e-05	5e-05
268451	Rab11fip4	5e-05	0.04	0.05	5e-05	5e-05	5e-05	5e-05	5e-05	5e-05
13446	Doc2a	0.07	0.09	5e-05	5e-05	5e-05	5e-05	5e-05	5e-05	5e-05
52065	Mfhas1	0.03	0.06	0.1	0.08	0.07	0.04	0.09	5e-05	5e-05
14453	Gas2	1.6	5e-05	1.1	5e-05	5e-05	5e-05	5e-05	5e-05	5e-05
67877	Naa20	5e-05	5e-05	0.12	0.09	5e-05	5e-05	5e-05	5e-05	5e-05
68050	Akirin1	0.18	0.25	5e-05	5e-05	5e-05	5e-05	5e-05	5e-05	5e-05
69216	Ccdc23	5e-05	5e-05	0.11	0.15	5e-05	5e-05	5e-05	5e-05	5e-05
213550	Dis3l	5e-05	0.08	5e-05	0.06	5e-05	5e-05	5e-05	5e-05	5e-05
228361	Ambra1	5e-05	5e-05	0.02	5e-05	0.03	0.68	0.41	0.16	5e-05
12561	Cdh4	0.04	0.03	5e-05	5e-05	5e-05	5e-05	5e-05	5e-05	5e-05
18574	Pde1b	0.04	5e-05	5e-05	5e-05	0.03	5e-05	5e-05	5e-05	5e-05
208292	Zfp871	5e-05	0.04	5e-05	5e-05	0.03	5e-05	5e-05	5e-05	5e-05
98985	Clp1	5e-05	0.05	0.07	5e-05	5e-05	5e-05	5e-05	5e-05	5e-05
72098	Tmem68	5e-05	5e-05	5e-05	0.07	0.05	5e-05	5e-05	5e-05	5e-05
252904	Vmn1r69	0.07	0.1	5e-05	5e-05	5e-05	5e-05	5e-05	5e-05	5e-05
71300	Rnf148	5e-05	0.27	5e-05	5e-05	0.18	5e-05	5e-05	5e-05	5e-05
13872	Ercc3	5e-05	0.004	5e-05	5e-05	0.005	5e-05	5e-05	5e-05	5e-05
17909	Myo10	5e-05	5e-05	0.34	5e-05	0.22	5e-05	5e-05	5e-05	5e-05
101613	Nlrp6	0.18	0.12	5e-05	5e-05	5e-05	5e-05	5e-05	5e-05	5e-05
194588	Obox7	0.29	5e-05	5e-05	0.46	5e-05	5e-05	5e-05	5e-05	5e-05
16977	Lrrc23	0.1	5e-05	5e-05	5e-05	0.15	5e-05	5e-05	5e-05	5e-05
100048185	Gm29692	5e-05	5e-05	5e-05	0.17	0.11	5e-05	5e-05	5e-05	5e-05
12043	Bcl2	0.06	0.09	5e-05	5e-05	5e-05	5e-05	5e-05	5e-05	5e-05
72106	Jmjd8	5e-05	5e-05	0.09	5e-05	0.06	5e-05	5e-05	5e-05	5e-05
68501	Nsmce2	0.11	0.09	0.03	0.05	5e-05	5e-05	0.13	5e-05	5e-05
58175	Rgs20	5e-05	0.06	5e-05	0.04	5e-05	5e-05	5e-05	5e-05	5e-05
72415	Sgol1	0.04	0.06	5e-05	5e-05	5e-05	5e-05	5e-05	5e-05	5e-05
320878	Mical2	5e-05	5e-05	0.21	0.13	5e-05	5e-05	5e-05	5e-05	5e-05
225995	D030056L22Rik	5e-05	0.11	5e-05	0.07	5e-05	5e-05	5e-05	5e-05	5e-05
100182	Akna	0.02	5e-05	5e-05	0.03	5e-05	5e-05	5e-05	5e-05	5e-05
22720	Zfp62	0.03	0.02	5e-05	5e-05	5e-05	5e-05	5e-05	5e-05	5e-05
110532	Adarb1	5e-05	0.03	5e-05	5e-05	0.02	5e-05	5e-05	5e-05	5e-05
65079	Rtn4r	5e-05	5e-05	5e-05	0.02	0.03	5e-05	5e-05	5e-05	5e-05
320209	Ddx11	5e-05	5e-05	0.03	0.02	5e-05	5e-05	5e-05	5e-05	5e-05
217310	Hid1	5e-05	0.02	5e-05	5e-05	0.03	5e-05	5e-05	5e-05	5e-05
628580	Vmn1r68	0.05	0.08	5e-05	5e-05	5e-05	5e-05	5e-05	5e-05	5e-05
81500	Sil1	0.08	5e-05	5e-05	0.05	5e-05	5e-05	5e-05	5e-05	5e-05
110173	Manba	5e-05	5e-05	0.004	5e-05	0.003	5e-05	5e-05	5e-05	5e-05
216233	Socs2	0.04	0.04	0.03	0.05	5e-05	5e-05	0.08	5e-05	5e-05
21769	Zfand3	5e-05	5e-05	0.78	5e-05	0.41	5e-05	5e-05	5e-05	5e-05
235623	Scap	5e-05	0.007	5e-05	5e-05	0.005	5e-05	5e-05	5e-05	5e-05
73103	3110009E18Rik	5e-05	5e-05	0.12	0.07	5e-05	5e-05	5e-05	5e-05	5e-05
231655	Oasl1	5e-05	0.09	0.16	5e-05	5e-05	5e-05	5e-05	5e-05	5e-05
73724	Mcee	0.12	0.22	5e-05	5e-05	5e-05	5e-05	5e-05	5e-05	5e-05
72282	1810062G17Rik	0.4	5e-05	5e-05	0.84	5e-05	5e-05	5e-05	5e-05	5e-05
30947	Adat1	5e-05	5e-05	5e-05	0.07	0.04	5e-05	5e-05	5e-05	5e-05
29857	Mapk12	5e-05	5e-05	0.35	0.74	5e-05	5e-05	5e-05	5e-05	5e-05
54151	Cyhr1	0.15	5e-05	5e-05	5e-05	0.08	5e-05	5e-05	5e-05	5e-05
56543	Kcnd3	1.7	0.74	5e-05	5e-05	5e-05	5e-05	5e-05	5e-05	5e-05
13716	Ell	0.18	5e-05	5e-05	5e-05	0.09	5e-05	5e-05	5e-05	5e-05
72431	Ceacam18	1	5e-05	5e-05	2.5	5e-05	5e-05	5e-05	5e-05	5e-05
213895	Bms1	0.45	0.74	0.56	0.42	0.7	0.31	0.32	0.15	0.71
170459	Stard4	5e-05	5e-05	0.1	0.05	5e-05	5e-05	5e-05	5e-05	5e-05
68675	Fam172a	5e-05	5e-05	0.08	5e-05	0.17	5e-05	5e-05	5e-05	5e-05
235180	Fez1	0.08	5e-05	5e-05	0.04	5e-05	5e-05	5e-05	5e-05	5e-05
223870	Senp1	5e-05	5e-05	0.08	5e-05	0.04	5e-05	5e-05	5e-05	5e-05
66720	Klhl10	5e-05	2.1	5e-05	5e-05	0.76	5e-05	5e-05	5e-05	5e-05
70218	Kif18b	0.01	5e-05	0.006	5e-05	5e-05	5e-05	5e-05	5e-05	5e-05
17979	Ncoa3	5e-05	5e-05	5e-05	0.006	0.01	5e-05	5e-05	5e-05	5e-05
231672	Fbxw8	5e-05	5e-05	0.06	0.03	5e-05	5e-05	5e-05	5e-05	5e-05
73681	Trmt11	5e-05	0.11	0.05	5e-05	5e-05	5e-05	5e-05	5e-05	5e-05
20351	Sema4a	5e-05	0.11	5e-05	0.05	5e-05	5e-05	5e-05	5e-05	5e-05
238871	Pde4d	0.05	5e-05	5e-05	5e-05	0.11	5e-05	5e-05	5e-05	5e-05
101206	Tada3	5e-05	5e-05	0.02	5e-05	0.04	5e-05	5e-05	5e-05	5e-05
29815	Bcar3	5e-05	0.02	5e-05	5e-05	0.04	5e-05	5e-05	5e-05	5e-05
22034	Traf6	5e-05	0.04	5e-05	5e-05	0.02	5e-05	5e-05	5e-05	5e-05
72308	Brf1	0.02	0.04	5e-05	5e-05	5e-05	5e-05	5e-05	5e-05	5e-05
94223	Dgcr8	5e-05	0.02	0.04	5e-05	5e-05	5e-05	5e-05	5e-05	5e-05
76265	Tsen54	5e-05	5e-05	0.04	0.02	5e-05	5e-05	5e-05	5e-05	5e-05
52184	Odf2l	0.04	5e-05	0.02	5e-05	5e-05	5e-05	5e-05	5e-05	5e-05
56738	Mocs1	5e-05	5e-05	5e-05	0.14	0.06	5e-05	5e-05	5e-05	5e-05
108079	Prkaa2	5e-05	0.04	5e-05	0.09	5e-05	5e-05	5e-05	5e-05	5e-05
114585	D17H6S53E	5e-05	5e-05	0.09	0.04	5e-05	5e-05	5e-05	5e-05	5e-05
19341	Rab4a	5e-05	5e-05	0.12	5e-05	0.05	5e-05	5e-05	5e-05	5e-05
245607	Gprasp2	5e-05	0.004	0.007	5e-05	5e-05	5e-05	5e-05	5e-05	5e-05
13836	Epha2	5e-05	0.02	5e-05	0.01	5e-05	5e-05	5e-05	5e-05	5e-05
244219	Zfp668	5e-05	5e-05	0.02	5e-05	0.01	5e-05	5e-05	5e-05	5e-05
71799	Ptcd1	5e-05	5e-05	0.01	0.02	5e-05	5e-05	5e-05	5e-05	5e-05
211401	Mtss1	5e-05	5e-05	5e-05	0.01	0.02	5e-05	5e-05	5e-05	5e-05
54651	Usp27x	5e-05	5e-05	0.02	0.01	5e-05	5e-05	5e-05	5e-05	5e-05
224273	Crybg3	5e-05	5e-05	0.02	0.01	5e-05	5e-05	5e-05	5e-05	5e-05
228136	Zdhhc5	5e-05	5e-05	0.02	5e-05	0.01	5e-05	5e-05	5e-05	5e-05
630579	Zfp808	5e-05	5e-05	0.01	0.02	5e-05	5e-05	5e-05	5e-05	5e-05
140577	Ankrd6	5e-05	5e-05	5e-05	0.07	0.03	5e-05	5e-05	5e-05	5e-05
20418	Shc3	0.07	0.2	5e-05	5e-05	5e-05	5e-05	5e-05	5e-05	5e-05
52705	Krr1	0.55	0.72	0.74	0.3	0.42	0.12	5e-05	0.01	0.65
69757	Leng1	5e-05	5e-05	0.17	0.06	5e-05	5e-05	5e-05	5e-05	5e-05
26556	Homer1	0.06	5e-05	0.17	5e-05	5e-05	5e-05	5e-05	5e-05	5e-05
269400	Rtel1	0.05	0.14	5e-05	5e-05	5e-05	5e-05	5e-05	5e-05	5e-05
11499	Adam5	5e-05	5e-05	0.005	0.01	5e-05	5e-05	5e-05	5e-05	5e-05
207175	Cetn4	5e-05	0.07	0.21	5e-05	5e-05	5e-05	5e-05	5e-05	5e-05
109229	Fam118b	5e-05	5e-05	0.02	5e-05	0.05	5e-05	5e-05	5e-05	5e-05
14800	Gria2	5e-05	5e-05	0.02	0.05	5e-05	5e-05	5e-05	5e-05	5e-05
68977	Haghl	5e-05	0.05	5e-05	5e-05	0.02	5e-05	5e-05	5e-05	5e-05
66083	Setd6	5e-05	5e-05	0.05	0.02	5e-05	5e-05	5e-05	5e-05	5e-05
70560	Wars2	5e-05	0.03	5e-05	0.08	5e-05	5e-05	5e-05	5e-05	5e-05
223701	Mkl1	5e-05	0.009	0.02	5e-05	5e-05	5e-05	5e-05	5e-05	5e-05
232947	Ppp1r37	5e-05	5e-05	0.01	0.02	5e-05	0.02	1.4	5e-05	1.8
229512	Smg5	5e-05	5e-05	0.008	5e-05	0.004	5e-05	5e-05	5e-05	5e-05
74201	Cep97	0.14	0.24	0.04	0.09	0.11	5e-05	5e-05	0.07	0.15
629242	Gm6958	0.77	5e-05	5e-05	5e-05	3.9	5e-05	5e-05	5e-05	5e-05
100038995	LOC100038995	0.003	5e-05	5e-05	5e-05	0.006	5e-05	5e-05	5e-05	5e-05
100040885	Gm16427	0.003	5e-05	5e-05	5e-05	0.006	5e-05	5e-05	5e-05	5e-05
100041032	Gm3106	0.003	5e-05	5e-05	5e-05	0.006	5e-05	5e-05	5e-05	5e-05
100041253	Gm16513	0.003	5e-05	5e-05	5e-05	0.006	5e-05	5e-05	5e-05	5e-05
269800	Zfp384	0.02	0.07	0.28	0.15	0.25	5e-05	0.05	5e-05	0.21
67216	Mboat2	5e-05	0.06	0.2	5e-05	5e-05	5e-05	5e-05	5e-05	5e-05
636187	Gm20764	0.24	5e-05	5e-05	5e-05	0.07	5e-05	5e-05	5e-05	5e-05
56013	Srcin1	0.008	5e-05	5e-05	0.006	0.03	0.16	0.008	0.002	0.02
77644	C330007P06Rik	0.24	0.06	0.35	0.26	0.16	0.18	0.18	5e-05	5e-05
94218	Cnnm3	5e-05	0.02	5e-05	5e-05	0.008	5e-05	5e-05	5e-05	5e-05
55982	Paxip1	5e-05	5e-05	0.02	0.06	5e-05	5e-05	5e-05	5e-05	5e-05
208104	Mlxip	5e-05	0.32	5e-05	5e-05	5e-05	0.49	1.1	5e-05	0.01
65103	Arl6ip6	0.43	0.14	0.16	0.37	0.35	5e-05	0.06	0.06	0.09
30050	Fbxw2	0.06	5e-05	0.23	5e-05	5e-05	5e-05	5e-05	5e-05	5e-05
213988	Tnrc6b	0.03	0.05	0.08	0.02	0.05	0.02	0.001	0.03	0.02
15516	Hsp90ab1	331	320	405	578	360	348	364	227	323
71955	Ist1	0.91	0.68	0.99	1.3	1.3	0.96	2	1.1	2.1
[truncated: 5,574 more rows]
